# Supplementary material for: A Novel Processing-Free Method for RNAseq Analysis of Spontaneous Sputum in Chronic Obstructive Pulmonary Disease
Source: Front Pharmacol. 2021 Aug 19;12:704969. doi: 10.3389/fphar.2021.704969 (PMC8417251; doi:10.3389/fphar.2021.704969)
Supplement: Supplementary file 1 [file Table2.XLSX]

## Sheet: S2
Request ID	Sample Type	Number of input reads	Uniquely mapped reads number	Uniquely mapped reads perc	Number of reads mapped to too many loci	Perc of reads mapped to too many loci	Mapping rate	Perc GC Read1	Perc GC Read2	Ribosomal RNA contamination	Duplication rate	Optical Duplication rate	HK coverage
S1842_00106	SS_MTM_plugs	63294759	54118473	85.5	3452209	5.45	90.95	49	50	0.52	19.31	0.67	10.3
S1842_00106	SS_MTM_whole	46664406	40022645	85.77	2107446	4.52	90.29	51	52	0.2	16.21	0.57	8.87
S1842_00107	SS_MTM_plugs	60024114	34782793	57.95	2328375	3.88	61.83	50	50	0.5	20.57	0.66	6.45
S1842_00107	SS_MTM_whole	56188971	44723212	79.59	2033639	3.62	83.21	48	49	0.09	16.56	0.55	6.92
S1842_00108	SS_MTM_plugs	50389238	43784160	86.89	3010488	5.97	92.86	50	51	0.3	23.17	0.55	9.37
S1842_00108	SS_MTM_whole	53636017	47680667	88.9	2975581	5.55	94.45	51	51	0.37	20.07	0.58	8.64
S1842_00110	SS_MTM_plugs	59061883	36919492	62.51	5320645	9.01	71.52	52	53	1.03	29.68	0.59	20.33
S1842_00110	SS_MTM_whole	55472787	42773213	77.11	5311518	9.57	86.68	55	56	0.52	40.85	0.62	16.27
S1842_00111	SS_MTM_plugs	46704429	22146742	47.42	1457444	3.12	50.54	44	45	0.28	16.76	0.53	9.74
S1842_00111	SS_MTM_whole	20209895	6608039	32.7	713869	3.53	36.23	50	53	0.33	57.29	0.61	2.05
S1842_00115	SS_MTM_plugs	96666423	71891973	74.37	7847904	8.12	82.49	51	52	1.18	26.95	0.66	24.05
S1842_00115	SS_MTM_whole	46265104	37181638	80.37	3607943	7.8	88.17	53	54	0.48	21.19	0.65	15.68
S1842_00118	SS_MTM_plugs	42519992	5145532	12.1	397808	0.94	13.04	50	50	0.29	20.5	0.55	2.87
S1842_00118	SS_MTM_whole	36720478	1639832	4.47	216891	0.59	5.06	51	50	0.44	25.21	0.55	0.6
