# Supplementary material for: A Novel Processing-Free Method for RNAseq Analysis of Spontaneous Sputum in Chronic Obstructive Pulmonary Disease
Source: Front Pharmacol. 2021 Aug 19;12:704969. doi: 10.3389/fphar.2021.704969 (PMC8417251; doi:10.3389/fphar.2021.704969)
Supplement: Supplementary file 2 [file Table3.XLSX]

## Sheet: raw_normalised_tpm
ENSEMBL_ID	GENE	S1842_00106_SS_MTM_Plug	S1842_00106_SS_MTM_Whole	S1842_00107_SS_MTM_Plug	S1842_00107_SS_MTM_Whole	S1842_00108_SS_MTM_Plug	S1842_00108_SS_MTM_Whole	S1842_00110_SS_MTM_Plug	S1842_00110_SS_MTM_Whole	S1842_00111_SS_MTM_Plug	S1842_00111_SS_MTM_Whole	S1842_00115_SS_MTM_Plug	S1842_00115_SS_MTM_Whole	S1842_00118_SS_MTM_Plug	S1842_00118_SS_MTM_Whole
ENSG00000207703	MIR7-2	0.1375	0.1375	0.1375	0.1375	0.1375	0.1375	0.1375	0.1375	0.1375	0.1375	0.1375	0.1375	0.1375	0.1375
ENSG00000107796	ACTA2	1.3188	1.1181	1.1332	0.8418	2.7653	2.8563	3.9755	5.0183	2.2022	0.5157	4.1042	4.8063	0.1375	0.1375
ENSG00000238143	AL161631.1	0.1375	0.1375	0.1375	0.1375	0.1375	0.1375	0.1375	0.1375	0.1375	0.1375	0.1375	0.1375	0.1375	0.1375
ENSG00000282994	AC215524.1	0.1375	0.1375	0.1375	0.1375	0.1375	0.1375	0.1375	0.1375	0.1375	0.1375	0.1375	0.1375	0.1375	0.1375
ENSG00000265388	RN7SL391P	0.4358	0.1375	0.8263	0.3666	0.2697	0.1375	0.4806	1.7974	0.6682	3.2582	1.1443	1.5629	0.1375	0.1375
ENSG00000163060	TEKT4	0.456	0.3148	0.1375	0.1375	0.2173	0.1375	1.5916	1.4438	3.5296	3.119	0.197	0.2139	0.1375	0.1375
ENSG00000134287	ARF3	4.8732	4.9629	4.6477	4.5135	5.6369	5.6275	5.2457	5.8863	5.1739	5.8402	5.6182	6.4007	5.422	6.048
ENSG00000178836	AC114812.1	0.1375	0.1375	0.1375	0.1375	0.1375	0.1375	0.1375	0.1375	0.1375	0.1375	0.1375	0.1375	0.1375	0.1375
ENSG00000125337	KIF25	0.1375	0.1375	0.1375	0.1375	0.1375	0.1375	0.1375	0.1375	0.1375	0.1375	0.1375	0.1375	0.1375	0.1375
ENSG00000206932	RNU6-4P	1.0056	0.8568	1.2793	1.258	1.7084	1.8812	0.7515	0.8544	1.1442	0.1375	1.3743	0.9424	2.383	0.1375
ENSG00000283873	SSU72P4	0.1375	0.1375	0.1375	0.1375	0.1375	0.1375	0.1375	0.1375	0.1375	0.1375	0.1375	0.1375	0.1375	0.1375
ENSG00000280307	AP000676.4	0.1375	0.1375	0.1375	0.1375	0.1375	0.1375	0.1375	0.1375	0.1375	0.1375	0.1488	0.1375	0.1375	0.1375
ENSG00000215840	AL592295.1	2.6782	3.2435	3.1486	3.0527	3.0114	3.3459	3.2058	3.6847	2.1731	3.1819	2.7754	3.34	2.0681	4.0798
ENSG00000169550	MUC15	0.1622	0.1817	0.1749	0.1375	0.166	0.1375	3.8612	2.4031	4.5992	2.8324	0.1794	0.1375	0.1375	0.7676
ENSG00000207127	Y_RNA	0.1375	0.1375	0.1375	0.1375	0.1375	0.1375	0.1375	0.1375	0.1375	0.1375	0.1375	0.1375	0.1375	0.1375
ENSG00000284071	AC012005.2	0.1375	0.1375	0.1375	0.1375	0.1375	0.1375	0.1375	0.1375	0.1375	0.1375	0.1375	0.1375	0.1375	0.1375
ENSG00000163466	ARPC2	7.1263	7.4775	7.39	7.7988	8.424	8.4648	7.2461	7.5772	7.773	7.7193	7.6132	7.9397	7.8668	8.3098
ENSG00000264110	MIR4300	0.1375	0.1375	0.1375	0.1375	0.1375	0.1375	0.1375	0.1375	0.1375	0.1375	0.1375	0.1375	0.1375	0.1375
ENSG00000223662	SAMSN1-AS1	1.2174	1.5157	0.934	1.2069	0.1375	0.685	0.5594	0.9977	0.1375	0.1375	0.8015	0.9018	1.527	0.1375
ENSG00000100097	LGALS1	6.717	7.0541	6.1091	6.117	6.7878	6.728	7.5418	7.8103	5.6874	8.1269	8.4757	8.4973	8.2402	5.2611
ENSG00000273111	LYPD4	0.1946	0.3337	0.2494	0.1375	0.1375	0.1375	0.1375	0.1375	0.1375	0.1375	0.1375	0.1375	0.1375	0.1375
ENSG00000252255	RNU2-35P	0.1375	0.8391	0.1375	0.1375	0.1375	0.1375	0.3823	0.1375	0.1375	0.1375	0.823	0.1375	0.1375	0.1375
ENSG00000123201	GUCY1B2	0.1548	0.168	0.2229	0.1741	0.1375	0.1375	0.1375	0.1657	0.163	0.1375	0.2006	0.2786	0.1375	0.1375
ENSG00000156298	TSPAN7	0.1444	0.1375	0.1375	0.1375	0.1375	0.1375	0.1375	0.2639	0.2099	0.1375	0.1375	0.1375	0.1375	0.1375
ENSG00000150244	TRIM48	0.1375	0.1375	0.1375	0.1375	0.1375	0.1375	0.1375	0.1375	0.1375	0.1375	0.1375	0.1375	0.1375	0.1375
ENSG00000236267	AP006216.2	0.1375	0.1375	0.1375	0.1375	0.1375	0.1375	0.1375	0.1375	0.1375	0.1375	0.1375	0.1375	0.1375	0.1375
ENSG00000237154	MCFD2P1	0.1375	0.1375	0.1375	0.1375	0.1375	0.1375	0.1375	0.1375	0.1375	0.1375	0.1375	0.1375	0.1375	0.1375
ENSG00000252413	RNU7-121P	0.1375	0.1375	0.1375	0.1375	0.1375	0.1375	0.1375	0.1375	0.1375	0.1375	0.1375	0.1375	0.1375	0.1375
ENSG00000274253	AC138649.1	0.1375	0.1375	0.1375	0.1721	0.1375	0.1375	0.1375	0.1375	0.2573	0.1375	0.1375	0.1375	0.1375	0.1375
ENSG00000117868	ESYT2	4.0259	4.5696	3.8988	3.9609	3.1574	3.3237	4.8631	5.2237	5.5444	6.0272	6.0299	6.6622	5.5155	3.0546
ENSG00000253321	AC099554.1	0.1375	0.1375	0.1375	0.1375	0.1375	0.1375	0.1375	0.1375	0.1375	0.1375	0.1375	0.1375	0.1375	0.1375
ENSG00000085982	USP40	1.159	0.7446	0.8141	0.6779	1.3247	0.6919	2.8882	2.708	4.153	2.9259	1.8764	1.85	3.4082	1.7667
ENSG00000198406	BZW1P2	0.7841	0.8167	0.6779	0.8189	0.3388	0.1375	0.76	0.1375	0.5553	0.7029	0.5127	0.4694	1.3233	0.1375
ENSG00000244425	RN7SL268P	0.1375	0.1375	0.1375	0.1375	0.1375	0.1375	0.1375	0.1375	0.1375	0.1375	0.1375	0.1375	0.1375	0.1375
ENSG00000258657	AL136018.1	0.1375	0.1375	0.1375	0.1375	0.1375	0.1375	0.4015	0.1375	0.1375	0.1375	0.1375	0.1375	0.1375	0.1375
ENSG00000130477	UNC13A	0.1454	0.1664	0.1375	0.1375	0.1375	0.1375	0.1562	0.1375	0.1375	0.1375	0.1375	0.1375	0.2106	0.1375
ENSG00000229759	MRPS18AP1	0.1375	0.1375	0.1375	0.1375	0.1375	0.1375	0.1375	0.1375	0.1375	0.1375	0.197	0.1375	0.1375	2.0481
ENSG00000173727	AP000769.1	3.2236	3.4905	3.0044	3.7871	3.196	3.1266	2.9725	3.2226	3.8421	4.8261	4.1136	4.1799	2.8407	4.6673
ENSG00000199231	snoU2_19	0.1375	0.1375	0.1375	0.1375	0.1375	0.1375	0.1375	0.1375	0.1375	0.1375	0.1375	0.1375	0.1375	0.1375
ENSG00000280244	AL512356.3	0.1754	0.1375	0.1375	0.1375	0.1375	0.1375	0.1375	0.1375	0.1375	0.1375	0.1375	0.1375	0.1375	0.1375
ENSG00000276872	AC171558.4	0.1375	0.1375	0.1375	0.1375	0.1375	0.1375	0.1375	0.1375	0.1375	0.1375	0.1375	0.1375	0.1375	0.1375
ENSG00000179674	ARL14	0.2533	0.1375	0.1375	0.1375	0.1375	0.2099	1.5598	0.9393	0.5995	0.1375	0.1375	0.2649	0.1375	0.1375
ENSG00000275174	U6	0.1375	0.1375	0.1375	0.1375	0.1375	0.1375	0.1375	0.1375	0.1375	0.1375	0.1375	0.1375	0.1375	0.1375
ENSG00000223893	GNL2P1	0.1375	0.1375	0.1375	0.1375	0.1375	0.1375	0.1375	0.1375	0.1375	0.1375	0.1375	0.1375	0.1375	0.1375
ENSG00000255843	AP000593.3	0.1375	0.1375	0.1375	0.1375	0.1375	0.1375	0.1375	0.1375	0.1375	0.1375	0.1375	0.5505	0.1375	0.1375
ENSG00000278367	AL356652.1	0.7559	0.6666	0.8607	0.5448	1.0149	0.9461	0.6171	0.7736	0.5159	0.1375	0.1375	0.7505	0.1375	0.1375
ENSG00000259457	AC100826.1	0.1375	0.1375	0.1375	0.1375	0.1375	0.1375	0.1375	0.1375	0.1375	0.1375	0.1375	0.1375	0.1375	0.1375
ENSG00000236045	AL031283.3	0.1375	0.1375	0.1375	0.1375	0.1375	0.1375	0.1375	0.1375	0.1375	0.1375	0.1375	0.1375	0.1375	0.1375
ENSG00000241562	RPL7P5	0.1375	0.1375	0.1375	0.1375	0.1375	0.1375	0.1375	0.1375	0.1375	0.1375	0.2249	0.1375	0.1375	0.1375
ENSG00000128159	TUBGCP6	2.0446	3.0476	2.1617	2.0758	2.5137	2.8671	3.4474	3.778	4.2885	2.9444	2.9578	3.8893	2.8529	3.13
ENSG00000137252	HCRTR2	0.1375	0.1375	0.1375	0.1375	0.1375	0.1375	0.1375	0.1375	0.1375	0.1375	0.1375	0.1375	0.1375	0.1375
ENSG00000238317	SNORD11	0.9562	1.5332	1.2185	0.5318	0.5429	0.4916	2.3799	0.2055	0.5342	0.1375	1.7338	2.2876	0.1375	0.1375
ENSG00000250376	AC093720.1	0.1375	0.1375	0.1375	0.1375	0.1375	0.1375	0.1375	0.1375	0.1375	0.1375	0.1375	0.1375	0.1375	0.1375
ENSG00000109062	SLC9A3R1	3.9363	5.4501	4.5231	4.837	3.7864	4.4417	5.684	6.8459	5.4288	5.2308	4.9672	5.4091	3.961	6.2531
ENSG00000228168	HNRNPA1P21	0.3278	0.7797	0.3655	0.3645	0.1375	0.1631	0.4786	0.3778	0.1375	0.1375	0.1375	0.1375	0.1375	0.1375
ENSG00000274128	AC027807.2	0.1375	0.1375	0.1375	0.1375	0.1375	0.1375	0.1375	0.1375	0.1375	0.1375	0.1375	0.1375	0.1375	0.1375
ENSG00000236915	AL356270.1	0.1375	0.1375	0.1375	0.1375	0.6635	0.7273	0.3053	0.1375	0.3022	0.1375	0.1375	0.1375	0.1375	0.1375
ENSG00000152229	PSTPIP2	6.5269	6.6831	7.2241	6.9291	6.5756	6.5958	5.2757	5.7598	5.0901	5.461	6.3739	6.5022	5.5719	4.5131
ENSG00000112297	CRYBG1	3.0591	3.4689	2.8012	3.1157	3.0799	3.1065	4.6306	4.9236	4.5498	4.5721	5.128	5.4032	4.8531	4.014
ENSG00000049618	ARID1B	3.88	4.0833	3.4533	3.5231	3.6752	3.61	4.365	4.856	4.1223	4.4405	4.4101	4.9073	4.5189	4.55
ENSG00000259939	AC022167.1	0.4558	0.1375	0.8069	1.0741	0.5199	0.1375	0.7863	1.0053	0.1375	0.1375	0.4125	1.3506	0.1375	0.1375
ENSG00000204365	C10orf126	0.1375	0.1375	0.1375	0.1375	0.1375	0.1375	0.1375	0.1375	0.1375	0.1375	0.1375	0.1375	0.1375	0.1375
ENSG00000068971	PPP2R5B	1.6725	1.7949	1.3742	1.2538	2.5392	2.5336	3.2636	3.6698	2.6127	2.6039	2.4519	3.0553	1.103	2.9027
ENSG00000226949	OR6K5P	0.1375	0.1375	0.1375	0.1375	0.1375	0.1375	0.1375	0.2651	0.1375	0.1375	0.1375	0.1375	0.1375	0.1375
ENSG00000258812	TRAV33	0.1375	0.1375	0.1375	0.1375	0.1375	0.1375	0.1375	0.1375	0.1375	0.1375	0.1375	0.1375	0.1375	0.1375
ENSG00000236138	DUX4L26	0.1375	0.1375	0.1375	0.2194	0.1375	0.1375	0.1981	0.1375	0.1375	0.1375	0.1375	0.2351	0.1375	0.1375
ENSG00000247213	LINC01498	0.1636	0.2469	0.1375	0.1375	0.1375	0.1375	0.1677	0.1375	0.1375	0.1375	0.1375	0.1375	0.1375	0.1375
ENSG00000208892	SNORA49	7.2276	5.9539	6.7081	7.8505	6.3057	6.4659	4.5747	2.1375	6.7002	4.3623	4.877	4.4673	6.9579	0.1375
ENSG00000139874	SSTR1	0.1375	0.1375	0.1375	0.1375	0.1375	0.1375	0.1375	0.1375	0.1375	0.1375	0.1375	0.1375	0.1375	0.1375
ENSG00000181915	ADO	1.5734	1.9946	0.8873	0.9385	1.4743	1.5937	2.7913	3.4332	2.8876	3.0411	2.4004	2.8752	2.6746	1.9602
ENSG00000185379	RAD51D	0.5307	0.8397	0.2129	0.327	0.7917	0.3847	2.0253	2.3438	0.6745	1.1399	1.3891	0.9423	0.5773	0.8964
ENSG00000243073	PRAMEF4	0.1375	0.1375	0.1375	0.1375	0.1375	0.1375	0.1375	0.1375	0.1375	0.1375	0.1375	0.1375	0.1375	0.1375
ENSG00000240875	LINC00886	0.1662	0.159	0.1375	0.1533	0.2511	0.1891	0.6057	0.367	2.2596	2.3132	0.2121	0.2138	0.1375	0.1375
ENSG00000010671	BTK	4.2564	4.9389	4.3515	3.6616	4.2827	4.2611	3.6879	4.4031	3.1798	4.5291	4.1398	4.6551	5.4728	4.9801
ENSG00000271971	AC120053.1	0.2004	0.1375	0.1375	0.2754	0.4602	0.376	0.4894	0.3754	1.1228	1.7995	0.2917	0.1667	0.1375	0.1375
ENSG00000152217	SETBP1	1.0937	1.372	0.6972	1.083	0.5567	0.9748	1.765	1.4979	2.7881	2.1032	1.0622	0.8449	0.4065	0.9017
ENSG00000228928	KPNA2P2	0.1375	0.1375	0.1375	0.1375	0.1375	0.1375	0.1375	0.1375	0.1375	0.1375	0.1375	0.1375	0.1375	0.1375
ENSG00000234264	DEPDC1-AS1	0.1375	0.1375	0.1375	0.1375	0.1375	0.1375	0.1375	0.1375	0.1375	0.1375	0.1375	0.1375	0.1375	0.1375
ENSG00000238105	GOLGA2P5	0.3514	0.7627	0.2431	0.2637	0.4505	0.2132	1.2831	1.8828	1.4019	1.708	0.6269	0.9181	0.3678	0.7733
ENSG00000274605	AL355338.1	0.5557	0.588	0.2372	0.1375	0.1375	0.1375	0.983	0.8357	2.6499	2.241	0.2953	0.1375	0.1375	0.1375
ENSG00000252272	RNA5SP470	0.1375	0.1375	0.1375	0.1375	0.1375	0.1375	0.1375	0.1375	0.1375	0.1375	0.1375	0.1375	0.1375	0.1375
ENSG00000224016	AC092681.1	0.1375	0.1375	0.1375	0.1375	0.1375	0.1375	0.1375	0.1375	0.1375	0.1375	0.1375	0.1375	0.1375	0.1375
ENSG00000104872	PIH1D1	2.671	3.4708	2.6159	2.0034	2.9379	2.8924	4.2228	4.9206	3.7445	4.7569	3.4737	4.1331	3.8363	4.4471
ENSG00000207475	SNORA80E	2.5281	2.0221	3.2356	2.8974	2.0091	2.4577	1.0657	0.1375	1.7171	0.1375	1.8543	1.9238	0.1375	0.1375
ENSG00000253795	MTND1P5	2.8752	2.807	2.0257	2.4808	0.1375	0.1375	0.9433	0.7598	1.2381	0.1375	1.8879	0.6512	1.4364	0.1375
ENSG00000261786	AC006058.1	0.1375	0.1375	0.1609	0.1375	0.1375	0.1375	0.1375	0.1622	0.1375	0.1375	0.1375	0.1375	0.402	0.1375
ENSG00000186146	DEFB131A	0.1375	0.1375	0.1375	0.1375	0.1375	0.1375	0.1375	0.1375	0.1375	0.1375	0.1375	0.1375	0.1375	0.1375
ENSG00000224560	AC108043.1	0.1375	0.1375	0.1375	0.1375	0.1375	0.1375	0.1375	0.1375	0.1375	0.1375	0.1375	0.1375	0.1375	0.1375
ENSG00000123472	ATPAF1	1.2592	0.9405	0.8985	0.5921	1.3841	1.3096	2.2369	2.3592	3.1796	1.7994	1.6869	1.8421	1.5355	2.1131
ENSG00000258206	AC137768.1	0.1375	0.1375	0.1375	0.1375	0.1375	0.1375	0.1375	0.1375	0.1375	0.1375	0.1375	0.1375	0.1375	0.1375
ENSG00000230445	LRRC37A6P	0.185	0.1595	0.1375	0.1375	0.1375	0.1375	0.4168	0.5713	1.6719	1.04	0.2329	0.1995	0.1375	0.1375
ENSG00000240919	AC022034.3	0.1375	0.1375	0.1375	0.1375	0.1375	0.1375	0.1375	0.1375	0.1375	0.1375	0.1375	0.1375	0.1375	0.1375
ENSG00000153064	BANK1	0.8124	1.0527	0.7019	0.6381	0.5475	0.614	1.1316	1.2149	1.3476	1.206	1.4122	1.9459	1.2946	1.3821
ENSG00000283591	MIR4430	0.1375	0.1375	0.1375	0.1375	0.1375	0.1375	0.1375	0.1375	0.1375	0.1375	0.1375	0.1375	0.1375	0.1375
ENSG00000156931	VPS8	6.3154	6.6414	5.7314	6.2102	7.0418	7.5781	4.4602	4.986	7.0082	5.1432	3.7887	4.44	6.6603	5.0852
ENSG00000228341	AC002381.1	0.1375	0.1375	0.1375	0.1375	0.1375	0.1375	0.1375	0.1375	0.1375	0.1375	0.1375	0.1375	0.1375	0.1375
ENSG00000277597	AC130343.2	0.1533	0.1375	0.1375	0.1375	0.1375	0.3483	0.1375	0.4067	0.7841	0.1375	0.2871	0.1375	0.1375	0.1375
ENSG00000275776	RN7SL185P	0.1375	0.3134	0.1375	0.1375	0.1375	0.1375	0.1375	0.1375	0.1375	0.1375	0.1375	0.1375	0.1375	0.1375
ENSG00000095066	HOOK2	3.7296	4.4369	4.2045	3.9658	4.5351	4.3716	4.7271	5.8683	4.5096	5.1708	4.3338	5.4207	4.3013	7.5648
ENSG00000101349	PAK5	0.1375	0.1375	0.1375	0.1375	0.1375	0.1375	0.1375	0.1375	0.1375	0.1375	0.1375	0.1375	0.1375	0.1375
ENSG00000236920	AL590727.1	0.1375	0.1375	0.1375	0.1375	0.1375	0.1375	0.1375	0.1375	0.1375	0.1375	0.1375	0.1375	0.1375	0.1375
ENSG00000235152	AL353052.1	0.1375	0.1375	0.1375	0.1375	0.1375	0.1375	0.1375	0.1375	0.1375	0.1375	0.1375	0.1375	0.1375	0.1375
ENSG00000142230	SAE1	2.5126	3.1153	2.4514	2.5233	2.6884	2.7036	4.3806	4.6481	3.2024	3.6835	3.7696	4.2865	3.6048	3.5971
ENSG00000084110	HAL	3.7538	3.9496	4.614	4.425	5.3631	5.5164	2.8351	4.3249	4.7793	3.6914	1.1757	1.8578	4.0682	5.9604
ENSG00000205923	CEMP1	0.7945	1.4094	0.6185	0.4804	0.3247	0.3333	0.3257	0.8361	0.6722	0.4021	0.4074	0.7927	0.9382	0.1375
ENSG00000254231	AC103760.1	0.1375	0.1375	0.1375	0.1375	0.1375	0.1375	0.3074	0.2019	0.9052	0.1375	0.2501	0.1375	0.1375	0.1375
ENSG00000223876	RPS27P1	0.1375	0.1375	0.1375	0.1375	0.1375	0.1375	0.1375	0.1375	0.1375	0.1375	0.1375	0.1375	0.1375	0.1375
ENSG00000252988	RNU6-111P	0.1375	0.1375	0.1375	0.1375	0.1375	0.1375	0.1375	0.1375	0.1375	0.1375	0.1375	0.1375	0.1375	0.1375
ENSG00000256811	AC079360.1	0.8197	1.0647	0.1375	0.1375	0.4112	0.1375	0.5842	0.1375	0.1375	0.1375	0.1375	0.1375	0.1375	0.1375
ENSG00000146386	ABRACL	3.6362	4.0702	3.1269	3.3863	3.8874	3.8849	4.033	3.2397	4.2121	3.8086	3.9021	4.1938	4.4645	4.5588
ENSG00000216687	AL390237.1	0.1375	0.1375	0.1375	0.1375	0.1375	0.1375	0.1375	0.1375	0.1375	0.1375	0.1375	0.1375	0.1375	0.1375
ENSG00000233977	AC099681.3	0.1375	0.1375	0.2594	0.1375	0.1375	0.1375	0.1375	0.1375	0.1375	0.1375	0.2073	0.1375	0.1375	0.1375
ENSG00000248673	LINC01331	0.1375	0.1375	0.1375	0.1375	0.1375	0.1375	0.1375	0.1375	0.1375	0.1375	0.1375	0.1375	0.1375	0.1375
ENSG00000270911	AC114878.2	0.1375	0.2472	0.1375	0.1375	0.1375	0.1801	0.1375	0.1375	0.1375	0.1375	0.1375	0.1375	0.1375	0.1375
ENSG00000241064	RN7SL110P	0.1375	0.1375	0.1375	0.1375	0.1375	0.1375	0.5449	0.2833	0.6402	0.1375	0.2061	0.1375	0.1375	0.1375
ENSG00000235070	AC062015.1	0.1375	0.1375	0.1375	0.1375	0.2127	0.1375	0.1375	0.1375	0.1375	0.1375	0.1375	0.1375	0.1375	0.1375
ENSG00000199803	RNU6-1159P	0.1375	0.1375	0.1375	0.1375	0.1375	0.1375	0.1375	0.1375	0.1375	0.1375	0.1375	0.1375	0.1375	0.1375
ENSG00000107829	FBXW4	2.1567	2.6648	1.8728	1.7958	2.3501	2.9148	4.4108	5.3696	3.4028	3.3555	4.027	4.9136	3.0526	4.2756
ENSG00000188580	NKAIN2	0.1375	0.1375	0.1375	0.1375	0.1375	0.1375	0.1375	0.1375	0.7808	0.3125	0.1375	0.1375	0.1375	0.1375
ENSG00000171823	FBXL14	2.1255	2.7032	2.7651	3.0354	1.5659	1.039	2.9845	3.295	4.0587	2.5833	2.775	3.1872	1.8576	2.5592
ENSG00000259278	AC087878.1	0.1375	0.1375	0.1375	0.1375	0.1375	0.1375	0.1375	0.1375	0.1375	0.1375	0.1375	0.1375	0.1375	0.1375
ENSG00000278793	U6	0.1375	0.1375	0.1375	0.1375	0.1375	0.1375	0.1375	0.1375	0.1375	0.1375	0.1375	0.1375	0.1375	0.1375
ENSG00000111596	CNOT2	5.674	6.5145	5.5465	5.4936	4.4161	4.542	4.5187	4.2938	4.8201	4.6985	4.3749	4.7223	5.6206	4.5572
ENSG00000188389	PDCD1	1.0327	1.4994	1.1917	0.8827	1.6533	0.9516	4.4263	4.3788	0.2835	0.1375	3.7233	4.3207	1.5644	0.1375
ENSG00000127314	RAP1B	5.7111	6.7303	6.0124	6.4684	5.9681	5.9827	6.4306	7.8463	5.7973	6.7847	6.4144	7.2927	6.4636	5.6883
ENSG00000265725	MIR3144	0.1375	0.1375	0.1375	0.1375	0.1375	0.1375	0.1375	0.1375	0.1375	0.1375	0.1375	0.1375	0.1375	0.1375
ENSG00000246375	AC107067.1	0.177	0.1375	0.1375	0.1375	0.1375	0.1375	1.186	1.1238	0.4321	0.1375	0.8117	1.0937	0.1375	0.1375
ENSG00000226721	EEF1DP2	0.7374	0.4377	0.4271	0.371	0.7285	0.6946	0.6927	1.6987	0.5155	0.1375	0.8963	1.521	0.5197	0.1375
ENSG00000171487	NLRP5	0.1375	0.1375	0.1375	0.1375	0.1375	0.1375	0.1375	0.1375	0.1375	0.1375	0.1375	0.1375	0.1375	0.1375
ENSG00000184923	NUTM2A	0.1569	0.2648	0.1375	0.1903	0.1375	0.1375	0.1375	0.1375	0.2627	0.1375	0.2192	0.4238	0.1375	0.1375
ENSG00000084731	KIF3C	0.9361	0.9555	1.3411	1.1313	2.4607	2.1083	1.3059	1.151	1.4385	1.3781	0.8488	1.3515	0.9526	0.1375
ENSG00000226218	AC079163.1	0.1375	0.1375	0.1375	0.1375	0.1375	0.1375	0.1375	0.1375	0.1375	0.1375	0.1375	0.1375	0.1375	0.1375
ENSG00000235146	AC114498.1	0.1375	0.1375	0.1375	0.1375	0.1375	0.1375	0.1375	0.1375	0.1375	0.1375	0.1375	0.1375	0.1375	0.1375
ENSG00000220392	FCF1P5	0.2172	1.0577	0.6519	0.1375	0.1375	0.1375	0.1375	0.1375	0.3151	0.1375	0.1375	0.1375	0.1375	0.1375
ENSG00000163072	NOSTRIN	0.1375	0.3481	0.191	0.1375	0.1375	0.1375	0.6506	0.1375	0.1375	0.1375	0.4443	0.3365	0.4024	3.0246
ENSG00000274576	IGHV2-70	0.1375	0.4724	0.1375	0.1375	0.1375	0.1375	0.1375	0.1375	0.1375	0.1375	0.3139	0.1375	0.1375	0.1375
ENSG00000279147	AC112504.1	0.1746	0.2425	0.2484	0.3003	0.1375	0.1499	0.3059	0.3027	0.1375	0.1375	0.8034	0.6948	0.1375	0.1375
ENSG00000133704	IPO8	2.02	2.5385	2.2672	1.957	2.5325	2.4341	3.295	3.809	3.5116	2.2707	3.3243	3.4561	3.8352	1.6907
ENSG00000263485	AC004147.1	0.1375	0.1375	0.1375	0.1375	0.1375	0.2734	0.4151	0.1652	0.2456	0.1375	0.2208	0.1375	0.1375	0.1375
ENSG00000236603	RANP1	0.2235	0.1375	0.1375	0.2063	0.1375	0.1375	0.1375	0.3834	0.1375	0.1375	0.2327	0.3821	0.9613	0.1375
ENSG00000211677	IGLC2	1.7735	2.0947	1.0057	1.0477	0.1375	0.3317	2.923	2.673	0.1375	0.1375	4.5215	4.9534	2.5681	0.1375
ENSG00000248915	ACTR6P1	0.1375	0.1375	0.1375	0.1375	0.1375	0.1375	0.1375	0.1375	0.1375	0.1375	0.1375	0.1375	0.1375	0.1375
ENSG00000187325	TAF9B	0.4011	0.7316	0.4666	0.3914	0.3364	0.4502	1.0204	0.5569	2.1066	1.3846	0.278	0.3158	1.0208	0.1375
ENSG00000200120	Y_RNA	0.7002	0.4085	0.5091	0.6645	0.352	0.3079	0.1375	0.2703	0.4716	0.1375	0.5427	0.1375	0.1375	0.1375
ENSG00000172602	RND1	1.8491	1.9699	2.2944	1.9401	0.4073	0.9461	2.6298	2.5911	3.8392	3.3842	1.4624	1.6154	0.9185	2.0983
ENSG00000108700	CCL8	0.6695	0.8748	0.2293	0.4706	1.5637	1.1304	7.6092	6.3856	3.9604	6.7983	9.2191	9.2237	0.1375	0.1375
ENSG00000200903	RNU1-42P	0.1375	0.1375	0.1375	0.1375	0.1375	0.1375	0.1375	0.5242	0.1375	0.1375	0.1375	0.1375	0.1375	0.1375
ENSG00000204183	GDF5OS	0.1375	0.1375	0.1375	0.1375	0.1375	0.1375	0.1375	0.1375	0.1375	0.1375	0.1375	0.1375	0.1375	0.1375
ENSG00000223162	RNA5SP280	0.1375	0.1375	0.1375	0.1375	0.1375	0.1375	0.1375	0.1375	0.1375	0.1375	0.1375	0.1375	0.1375	0.1375
ENSG00000250568	AC098591.2	1.2333	1.1905	0.6206	0.9623	0.4581	0.3957	1.4069	0.2174	1.0769	0.1375	1.7967	1.9509	2.067	0.1375
ENSG00000229839	AC018462.1	0.1375	0.1375	0.1375	0.1375	0.1375	0.1375	0.1375	0.1375	0.2418	0.1375	0.1404	0.2056	0.1375	0.1375
ENSG00000124570	SERPINB6	3.2219	3.8849	3.5363	3.6114	3.5351	3.5471	4.9947	5.2365	5.2085	5.6068	4.8124	5.1828	4.3721	4.1293
ENSG00000263978	MIR4499	0.1375	0.3185	0.1375	1.1671	0.1375	0.1375	0.5101	0.9488	0.669	0.8306	0.3065	0.5518	0.1375	0.1375
ENSG00000004799	PDK4	0.707	1.2691	0.6877	0.3053	0.6557	0.585	2.5234	3.8488	3.5053	3.1788	1.285	2.5233	5.3291	2.0627
ENSG00000207330	RNU6-73P	0.1375	0.1375	0.1375	0.1375	0.1375	0.1375	0.1375	0.1375	0.1375	0.1375	0.1375	0.1375	0.1375	0.1375
ENSG00000234474	MIR3663HG	0.1375	0.1375	0.1375	0.1375	0.1375	0.1375	0.1375	0.1375	0.1375	0.1375	0.1375	0.1375	0.1375	0.1375
ENSG00000254118	MTCYBP20	0.1375	0.2593	0.1375	0.1375	0.1375	0.1375	0.1375	0.1375	0.1375	0.1375	0.1375	0.1375	0.1375	0.1375
ENSG00000252115	Y_RNA	0.1375	0.1375	0.1375	0.1375	0.1375	0.1375	0.1375	0.1375	0.1375	0.1375	0.1375	0.1375	0.1375	0.1375
ENSG00000233223	AC016876.1	0.9844	1.5728	0.5196	0.6899	0.8644	0.6162	2.0318	2.3657	2.786	3.6785	1.3088	1.1995	3.1246	0.1375
ENSG00000279516	FAM230C	0.1375	0.1375	0.1375	0.1375	0.1375	0.1375	0.1375	0.1375	0.1375	0.1375	0.1375	0.1375	0.1375	0.1375
ENSG00000276160	GGTLC5P	0.1375	0.1375	0.1375	0.1375	0.1375	0.1375	0.1375	0.1375	0.1375	0.1375	0.1375	0.1375	0.1375	0.1375
ENSG00000254724	OR7E10P	0.2926	0.1375	0.2511	0.2412	0.1375	0.1375	0.1375	0.2602	0.1375	0.62	0.4898	0.7054	0.6375	0.1375
ENSG00000223819	PPIAP89	0.1375	0.1375	0.1375	0.1375	0.1375	0.1375	0.1375	0.1375	0.6156	0.9177	0.1375	0.1375	0.1375	0.1375
ENSG00000271507	AC025884.3	0.1375	0.1375	0.1375	0.1375	0.1375	0.1375	0.1375	0.1375	0.1375	0.1375	0.1375	0.1375	0.1375	0.1375
ENSG00000254423	AC087203.1	0.1375	0.2534	0.1375	0.1375	0.1375	0.1375	0.1375	0.1375	0.1375	0.1375	0.1375	0.1375	0.1375	0.1375
ENSG00000163993	S100P	6.6567	6.994	7.4105	7.6594	7.6359	7.5469	7.4011	6.1508	8.0321	6.3834	3.227	3.0731	6.3456	7.3864
ENSG00000197324	LRP10	6.0147	6.0225	5.389	5.6027	7.0941	7.748	5.6906	6.6057	5.6401	5.5962	6.0332	6.3048	5.4785	7.129
ENSG00000250625	AL031073.1	0.1375	0.1375	0.1375	0.1375	0.1375	0.1375	0.1375	0.1375	0.1375	0.1375	0.1375	0.1375	0.1375	0.1375
ENSG00000218617	AL121949.3	0.1375	0.1375	0.1375	0.1375	0.1375	0.1375	0.1375	0.1375	0.1375	0.1375	0.1375	0.1375	0.1375	0.1375
ENSG00000257622	AL512356.1	0.1375	0.2097	0.1375	0.1375	0.1375	0.1375	0.1375	0.1375	0.1375	0.1375	0.1375	0.1375	0.1375	0.1375
ENSG00000111445	RFC5	0.5098	0.8829	0.3832	0.644	0.5148	0.4826	1.705	1.7993	2.3049	2.212	0.9866	0.9809	0.1375	0.1375
ENSG00000272755	AC245297.2	0.2516	0.7493	0.7513	0.4744	0.1375	0.1375	0.2913	0.1375	0.1375	0.1375	0.1957	0.1375	0.1375	0.1375
ENSG00000237612	AP002856.4	0.1375	0.1375	0.1375	0.1375	0.1375	0.1375	0.1375	0.1375	0.1375	0.1375	0.1375	0.1375	0.1375	0.1375
ENSG00000200379	RN7SKP45	0.1375	0.1375	0.1375	0.1375	0.1375	0.1375	0.1375	0.1375	0.1375	0.1375	0.1375	0.1375	0.1375	0.1375
ENSG00000229375	USP24P1	0.1375	0.1375	0.1375	0.1375	0.1375	0.1375	0.1375	0.1375	0.1375	0.1375	0.1375	0.1375	0.1375	0.1375
ENSG00000264663	KRT8P34	0.281	0.2688	0.1614	0.1964	0.1375	0.2679	0.9876	0.6598	0.1375	0.1375	0.7572	0.6977	0.1375	0.1375
ENSG00000188372	ZP3	0.337	0.3078	0.6494	0.771	0.1375	0.2845	1.5433	1.1758	0.9064	1.3262	0.1375	0.3544	0.1375	0.1375
ENSG00000133624	ZNF767P	1.3183	1.7516	1.0074	0.6638	1.27	1.7355	2.6439	3.5617	1.5477	2.4348	2.7325	3.0252	3.3975	0.7138
ENSG00000222095	SNORD113	0.1375	0.1375	0.1375	0.1375	0.1375	0.1375	0.1375	0.1375	0.1375	0.1375	0.1375	0.1375	0.1375	0.1375
ENSG00000243347	LINC02045	0.1375	0.1375	0.1375	0.1375	0.1375	0.1375	0.1375	0.1375	0.1375	0.1375	0.1375	0.1375	0.1375	0.1375
ENSG00000144468	RHBDD1	1.9673	1.65	1.7146	0.9955	1.6139	1.3415	3.1403	3.4354	3.9774	2.5402	3.0731	2.8048	2.0269	2.8851
ENSG00000279529	AC008764.8	1.9201	2.3731	2.1253	2.9066	0.595	0.7954	1.3581	2.152	1.8502	1.2583	1.1967	1.6404	0.7592	1.6736
ENSG00000249270	KATNBL1P4	0.1375	0.1375	0.1375	0.1375	0.1375	0.1375	0.1375	0.1375	0.1375	0.1375	0.1375	0.1375	0.1375	0.1375
ENSG00000226587	AC006455.1	0.1375	0.1375	0.1375	0.1375	0.1375	0.1375	0.1375	0.1375	0.1375	0.1375	0.1375	0.1375	0.1375	0.1375
ENSG00000145936	KCNMB1	0.8205	0.7953	1.1229	1.5978	0.6894	0.8028	1.1072	1.5754	0.851	2.8561	3.6829	4.6506	1.0689	0.1375
ENSG00000235602	POU5F1P3	0.2086	0.2648	0.2443	0.1375	0.2044	0.3061	0.2886	0.4534	0.1375	0.1375	0.3089	0.1375	0.1375	1.2609
ENSG00000222607	RNU6-628P	0.1375	0.1375	0.1375	0.1375	0.1375	0.1375	0.1375	0.1375	0.1375	0.1375	0.1375	0.1375	0.1375	0.1375
ENSG00000215187	FAM166B	0.2501	0.7511	0.1375	0.1375	0.3115	0.5618	2.9088	3.0339	6.0765	5.7343	0.7469	0.9323	0.1375	0.1375
ENSG00000260773	AC055855.2	0.1375	0.1375	0.1375	0.1375	0.1375	0.1375	0.1375	0.1375	0.5135	0.1375	0.1375	0.1375	0.1375	0.1375
ENSG00000111775	COX6A1	5.386	5.7824	5.0536	5.0358	6.0025	5.9503	6.5967	6.059	7.9607	7.816	6.3588	6.2663	6.5484	6.6481
ENSG00000233058	LINC00884	3.4453	3.9751	4.2121	4.5081	3.7772	4.1084	2.2435	2.0696	1.8464	2.5469	2.6079	2.8113	2.7545	2.6008
ENSG00000158528	PPP1R9A	0.4378	0.2009	0.1587	0.1482	0.1678	0.175	1.4828	1.659	2.475	1.4411	0.1864	0.2181	0.8203	1.3723
ENSG00000173705	SUSD5	0.1531	0.1375	0.1375	0.1375	0.1557	0.1375	0.1559	0.1375	0.8415	0.8881	0.1375	0.1375	0.276	0.1375
ENSG00000236437	LINC02151	0.1375	0.1375	0.1375	0.1375	0.1375	0.1375	0.1375	0.1375	0.1375	0.1375	0.1375	0.1375	0.1375	0.1375
ENSG00000225831	RPS18P1	0.1723	0.1375	0.256	0.1978	0.1375	0.1375	0.1375	0.1999	0.1375	0.1375	0.1699	0.4155	0.1375	0.1375
ENSG00000176244	ACBD7	0.1375	0.1375	0.1375	0.2156	0.1375	0.1375	0.8005	0.6718	3.8258	2.4341	0.3538	0.1375	0.6093	0.1375
ENSG00000264924	AC090772.1	0.1375	0.6177	0.1375	0.1375	0.1375	0.1375	0.1375	0.1375	0.1375	0.1375	0.2634	0.1375	0.1375	0.1375
ENSG00000227181	LINC01688	0.1375	0.1375	0.1375	0.1375	0.1375	0.1375	0.1375	0.1375	0.1375	0.1375	0.1375	0.1375	0.1375	0.1375
ENSG00000204655	MOG	0.1375	0.1375	0.1375	0.1375	0.1375	0.1375	0.1375	0.1375	0.1375	0.1375	0.1375	0.1375	0.1375	0.1375
ENSG00000258869	LINC02312	0.1375	0.1375	0.1375	0.1375	0.1375	0.1375	0.1375	0.1375	0.1375	0.1375	0.1375	0.1375	0.1375	0.1375
ENSG00000242889	RN7SL449P	0.6996	0.5632	0.1375	0.4688	0.4277	0.4412	0.8367	1.2855	0.1375	0.1375	0.1467	1.016	1.041	0.1375
ENSG00000236028	AL354766.2	0.1375	0.1375	0.1375	0.1375	0.1375	0.1375	1.015	0.1375	3.9866	3.2326	0.1375	0.1375	0.1375	0.1375
ENSG00000251376	AC034238.3	0.1375	0.1375	0.1375	0.1375	0.1375	0.1375	0.1375	0.1375	0.1375	0.1375	0.1375	0.1375	0.1375	0.1375
ENSG00000085644	ZNF213	1.7223	1.6166	1.2905	1.2906	2.4266	1.9136	2.7808	3.2707	2.6554	1.9017	2.0414	2.6841	1.8047	2.3047
ENSG00000254987	AP002989.1	0.1375	0.1375	0.1375	0.1375	0.1375	0.1375	0.1375	0.1375	0.1375	0.1375	0.1375	0.1375	0.1375	0.1375
ENSG00000264554	RN7SL793P	0.1375	0.1375	0.1375	0.1375	0.1375	0.1375	0.1375	0.1375	0.1375	0.1375	0.1375	0.1375	0.1375	0.1375
ENSG00000168769	TET2	6.3658	6.5528	6.4435	6.4265	6.7313	6.9278	5.5212	5.6908	5.9525	5.7563	6.4122	6.9763	6.3268	6.3674
ENSG00000177191	B3GNT8	3.9776	4.6784	4.1333	3.3547	4.7741	4.8816	3.9527	4.8716	5.6585	2.7908	2.7992	3.4702	3.6609	4.8144
ENSG00000162368	CMPK1	2.5524	2.6071	2.0614	1.9849	2.4784	1.4819	3.8745	3.2602	4.5361	4.5627	2.7267	2.4382	4.241	5.1614
ENSG00000279930	AL032819.2	0.259	0.2369	0.1645	0.1859	0.2199	0.1375	0.1889	0.1943	0.1375	0.1375	0.1979	0.2151	0.1375	0.1375
ENSG00000251818	SCARNA20	0.1375	0.1375	0.1375	0.1375	0.1375	0.1375	0.1375	0.1375	0.1375	0.1375	0.1375	0.1375	0.1375	0.1375
ENSG00000084112	SSH1	3.4357	4.2068	4.1089	4.3731	4.9398	5.4924	4.5342	5.6601	4.1682	4.3575	4.2279	5.1765	5.2801	2.7243
ENSG00000269475	AC244102.2	0.1375	0.1375	0.1375	0.1375	0.1375	0.1375	0.1375	0.1375	0.1375	0.1375	0.1375	0.1375	0.1375	0.1375
ENSG00000166164	BRD7	2.4919	2.3168	2.3097	2.6104	2.3266	2.4682	3.7687	4.2373	2.9952	3.4	3.6716	4.8807	3.516	2.7796
ENSG00000229127	AC007038.1	0.4757	0.5405	0.4516	0.3667	0.4977	0.5838	0.7893	0.6936	0.4682	1.589	0.9762	0.4993	1.0672	0.9742
ENSG00000100023	PPIL2	2.0529	2.3549	1.8267	1.6644	2.7749	2.587	3.3086	3.6765	3.0617	3.0035	3.1619	3.5022	3.6816	2.5143
ENSG00000248208	WDR45P1	3.1443	3.5636	2.4613	3.5027	1.6533	1.9751	4.7763	6.15	3.0662	4.0652	4.9476	5.7044	3.1279	0.1375
ENSG00000279818	AP002991.2	0.1375	0.1375	0.1375	0.1375	0.1375	0.1375	0.1375	0.1375	0.1375	0.1375	0.1375	0.1974	0.1375	0.1375
ENSG00000283717	MIR6831	0.3022	0.514	0.38	0.3282	0.2079	0.3007	0.3151	0.4051	0.4901	1.0552	0.2534	0.4577	0.1375	1.7789
ENSG00000275772	AC244157.2	0.1375	0.1375	0.1375	0.1375	0.1375	0.1375	0.2655	0.1375	0.1375	0.1375	0.1375	0.1375	0.1375	0.1375
ENSG00000230815	AL807757.1	0.6589	0.4667	0.8915	0.8266	0.7981	0.1375	0.7699	0.1375	1.3224	0.1375	0.9626	0.6452	2.0055	0.1375
ENSG00000160199	PKNOX1	2.5928	2.6375	2.5191	3.0518	2.8405	3.0773	2.364	3.3708	4.228	3.668	2.7453	3.264	3.5176	1.5403
ENSG00000267470	ZNF571-AS1	0.4266	0.1375	0.1799	0.1375	0.1375	0.1375	0.2647	0.1375	0.5263	0.8493	0.2868	0.1375	0.1375	0.1375
ENSG00000273336	OR7M1P	0.1375	0.1375	0.1375	0.1375	0.1375	0.1375	0.1375	0.1375	0.1375	0.1375	0.1375	0.6764	0.1375	0.1375
ENSG00000211991	MIR676	0.1375	0.1375	0.1375	0.1375	0.1375	0.1375	0.1375	0.1375	0.1375	0.1375	0.1375	0.1375	0.1375	0.1375
ENSG00000225076	WWC3-AS1	0.1375	0.1375	0.1375	0.1375	0.1375	0.1375	0.1375	0.1375	0.1375	0.1375	0.1375	0.1375	0.1375	0.1375
ENSG00000271367	AL034374.2	0.2276	0.1375	0.338	0.1375	0.1375	0.1375	0.1375	0.1375	1.2684	0.1375	0.3234	0.4221	0.1375	0.1375
ENSG00000257477	LINC01154	0.1375	0.4901	0.1375	0.1375	0.1375	0.1375	0.757	0.1375	0.6831	0.1375	1.4177	1.1645	0.1375	0.1375
ENSG00000229849	PYHIN5P	0.1375	0.1375	0.1375	0.1375	0.1375	0.1375	0.1375	0.1375	0.1375	0.1375	0.1375	0.1375	0.1375	0.1375
ENSG00000242640	RPS29P11	0.1375	0.1375	0.1375	0.1375	0.1375	0.1375	0.1375	0.1375	1.3312	0.1375	0.1375	0.1375	0.1375	0.1375
ENSG00000273066	AL355987.4	0.2293	0.1877	0.1989	0.3476	0.2966	0.5056	0.57	0.6754	0.5447	0.2158	0.2795	0.5796	0.5819	0.1375
ENSG00000256642	LINC00273	0.1375	0.1375	0.1375	0.1375	0.1375	0.1375	0.1375	0.1375	0.1375	0.1375	0.1375	0.1375	0.1375	0.1375
ENSG00000230568	SF3A3P1	0.1375	0.1375	0.1375	0.1375	0.1375	0.1375	0.1375	0.1375	0.1375	0.1375	0.1375	0.1375	0.1375	0.1375
ENSG00000201635	Y_RNA	0.1375	0.1375	0.1375	0.1375	0.1375	0.1375	0.1375	0.1375	0.1375	0.1375	0.1375	0.1375	0.1375	0.1375
ENSG00000268669	AC008687.5	0.1375	0.1375	0.1375	0.1375	0.1375	0.1375	0.2753	0.1375	0.1375	0.1375	2.397	1.2429	0.1375	0.1375
ENSG00000120949	TNFRSF8	4.2139	4.6891	3.5104	3.7469	4.4067	4.2518	3.0539	3.8374	2.9054	1.2424	1.4077	1.2679	1.286	2.0721
ENSG00000278554	Metazoa_SRP	0.1375	0.1375	0.1375	0.1375	0.1375	0.1375	0.1375	0.1375	0.1375	0.1375	0.1375	0.1375	0.1375	0.1375
ENSG00000070047	PHRF1	2.707	3.4793	2.7341	2.7394	3.645	3.7148	4.6306	5.5717	4.0181	4.8123	4.6103	5.5739	3.8788	5.0498
ENSG00000213594	GAPDHP25	0.1375	0.1375	0.1375	0.1375	0.1375	0.1375	0.1375	0.1375	0.1375	0.1375	0.1375	0.1375	0.1375	0.1375
ENSG00000273275	AC017083.2	0.2455	0.1375	0.1375	0.1375	0.1375	0.1375	0.3023	0.1375	0.3768	0.1375	0.1375	0.1375	0.1375	0.1375
ENSG00000144597	EAF1	5.604	6.1393	5.0988	5.5174	3.5847	3.5735	4.7341	5.5686	4.4187	4.8263	5.5498	6.1407	4.6377	3.4098
ENSG00000226750	AL360271.2	0.1375	0.1375	0.1375	0.1375	0.1375	0.1375	0.1375	0.1375	0.1375	0.1375	0.1375	0.1375	0.1375	0.1375
ENSG00000228024	CYP1D1P	0.1375	0.1375	0.1375	0.1375	0.1375	0.1375	0.1375	0.1375	0.1375	0.1375	0.1375	0.1375	0.1375	0.1375
ENSG00000276116	FUT8-AS1	0.375	0.6718	0.1375	0.2059	0.2536	0.1375	1.0371	0.7983	2.7247	0.4186	0.3575	0.5335	0.5485	0.1375
ENSG00000279469	AC109454.4	0.1375	0.1375	0.1375	0.227	0.1375	0.1375	0.1375	0.1375	0.394	0.1375	0.1375	0.1375	0.1375	0.1375
ENSG00000280337	DUX4L25	0.1375	0.1375	0.1375	0.1375	0.1375	0.1375	0.1375	0.1375	0.1375	0.1375	0.1375	0.1375	0.1375	0.1375
ENSG00000258969	LINC02307	0.1375	0.1375	0.1375	0.1375	0.1375	0.1375	0.1375	0.1375	0.1375	0.1375	0.1375	0.1375	0.1375	0.1375
ENSG00000272971	AL365181.4	0.1375	0.1375	0.1375	0.1375	0.1375	0.1375	0.1375	0.1375	0.1375	0.1375	0.1375	0.1375	0.1375	0.1375
ENSG00000157578	LCA5L	0.3065	0.573	0.1375	0.2437	0.1375	0.1375	2.0662	0.9735	5.3904	3.8894	0.2685	0.1375	0.1375	0.1375
ENSG00000144278	GALNT13	0.1375	0.1375	0.1375	0.1375	0.1375	0.1375	0.1375	0.1375	0.17	0.1375	0.1375	0.1375	0.1375	0.1375
ENSG00000125827	TMX4	3.2872	3.9805	2.9246	2.9649	3.4966	3.3084	3.1348	3.79	4.0756	3.4593	3.0321	3.5959	3.8106	4.188
ENSG00000248440	AC091917.1	0.1375	0.321	0.1375	0.1375	0.1375	0.1375	0.1375	0.1375	0.1375	0.1375	0.1375	0.1375	0.1375	0.1375
ENSG00000226181	AL132671.1	0.1375	0.1375	0.1375	0.1375	0.1375	0.1375	0.1375	0.1375	0.1375	0.1375	0.1375	0.1375	0.1375	0.1375
ENSG00000234352	AC009264.1	0.1375	0.1375	0.1375	0.1375	0.1375	0.1375	0.1375	0.1375	0.1375	0.1375	0.1385	0.1375	0.1375	0.1375
ENSG00000253735	AC021736.1	0.1375	0.1375	0.1375	0.1375	0.1375	0.1375	0.1375	0.1375	0.1375	0.1375	0.1375	0.1375	0.1375	0.1375
ENSG00000178722	C5orf64	0.1375	0.1375	0.1375	0.1375	0.1375	0.1375	0.4172	0.1375	0.1375	0.1375	0.1375	0.1944	0.1375	0.1375
ENSG00000254049	NRG1-IT3	0.1375	0.1375	0.1375	0.1375	0.1375	0.1375	0.1375	0.1375	0.1375	0.1375	0.1375	0.1375	0.1375	0.1375
ENSG00000013588	GPRC5A	2.0651	2.2789	0.8872	1.2623	0.5288	0.9827	4.3581	3.5976	3.0903	2.9703	2.4837	2.0502	1.7958	3.8948
ENSG00000251483	LYPLA1P2	0.1375	0.1375	0.1375	0.1375	0.1375	0.1375	0.1375	0.1375	0.1375	0.1375	0.1375	0.1375	0.1375	0.1375
ENSG00000101773	RBBP8	3.1137	3.343	2.5181	2.8554	1.9602	1.5369	3.1488	2.8986	3.0386	2.4086	3.4171	3.3816	3.5991	2.3312
ENSG00000260603	AC133539.1	0.1375	0.1375	0.1375	0.1375	0.1375	0.1375	0.1375	0.1375	0.1375	0.1375	0.1375	0.1375	0.1375	0.1375
ENSG00000249106	AC097537.1	0.1375	0.1375	0.1375	0.1375	0.1375	0.1375	0.1375	0.1375	0.1375	0.1375	0.1375	0.1375	0.1375	0.1375
ENSG00000177807	KCNJ10	0.1375	0.1375	0.1375	0.1568	0.154	0.1375	0.2037	0.3491	0.1375	0.422	0.3758	0.6515	0.1375	0.1375
ENSG00000250241	AC105383.1	0.1375	0.1375	0.1375	0.1375	0.1375	0.1375	0.1375	0.1375	0.1375	0.1375	0.1375	0.1375	0.1375	0.1375
ENSG00000218823	PAPOLB	0.1375	0.1375	0.1375	0.1375	0.1375	0.1375	0.1375	0.1375	0.1375	0.1375	0.1646	0.1375	0.1375	0.1375
ENSG00000259999	AC009054.1	1.2599	0.7778	1.062	1.577	0.9607	0.7352	0.4442	1.731	1.9525	2.2108	1.2865	1.4101	1.2526	0.1375
ENSG00000279786	AC105235.1	0.1804	0.1375	0.1696	0.1375	0.1866	0.1898	0.1375	0.3899	0.2339	0.1375	0.1375	0.2283	0.1375	0.1375
ENSG00000122824	NUDT10	0.2463	0.1375	0.1375	0.1375	0.1375	0.1375	0.1375	0.1375	0.1375	0.1375	0.1375	0.1375	0.1375	0.1375
ENSG00000224686	ELOCP23	0.1375	0.1375	0.1375	0.1375	0.1375	0.1375	0.1375	0.1375	0.1375	0.1375	0.1375	0.1375	0.1375	0.1375
ENSG00000261053	NAMPTP3	0.1375	1.0432	0.1375	0.6268	0.6445	0.3337	0.1375	0.1375	0.1375	0.1375	0.1375	0.1375	0.1375	0.1375
ENSG00000171928	TVP23B	2.0273	2.9501	2.1727	2.3219	2.5014	1.5701	3.3813	3.478	4.3262	3.2717	2.5303	3.1702	2.6067	2.2706
ENSG00000089327	FXYD5	5.5507	5.7523	5.0698	4.8886	5.5032	4.7546	6.1606	7.1058	4.7007	6.0941	6.0696	7.3023	6.0904	3.4105
ENSG00000233236	LINC02573	0.1375	0.1375	0.1375	0.1375	0.1375	0.1375	0.1375	0.1375	0.1375	0.1375	0.1375	0.1375	0.1375	0.1375
ENSG00000259161	AL137779.3	0.1375	0.1375	0.1375	0.1375	0.1375	0.1375	0.1375	0.1375	0.1375	0.1375	0.1375	0.1375	0.1375	0.1375
ENSG00000200151	RN7SKP231	0.1375	0.1375	0.1375	0.1375	0.1375	0.1375	0.1375	0.1375	0.1375	0.1375	0.1375	0.1375	0.1375	0.1375
ENSG00000162461	SLC25A34	2.9608	3.8219	1.6326	2.3814	1.2048	0.9372	1.6729	3.0238	2.0463	1.7591	2.3789	3.1886	2.0803	2.4395
ENSG00000259628	AC007000.3	0.425	0.7068	0.504	0.5014	0.7298	0.8318	0.8176	0.9683	0.4122	0.1375	1.0032	1.166	0.1375	0.1375
ENSG00000227302	SSXP9	0.1375	0.1375	0.1375	0.1375	0.1375	0.1375	0.1375	0.1375	0.1375	0.1375	0.1375	0.1375	0.1375	0.1375
ENSG00000225036	CDK4P1	0.1375	0.1375	0.1375	0.1375	0.1375	0.1375	0.1375	0.1375	0.1375	0.1375	0.1375	0.1375	0.1375	0.1375
ENSG00000217576	AL158066.1	0.1778	0.1375	0.1684	0.2103	0.2216	0.2107	0.7145	0.7801	1.0801	0.4161	0.5035	0.1375	0.3142	0.1375
ENSG00000277423	AC069234.5	0.226	0.4132	0.1375	0.4584	0.1375	0.1375	0.4375	0.1555	0.2904	0.3111	0.8103	0.6457	1.2941	0.1375
ENSG00000229690	MTCO2P1	0.1375	0.1375	0.1375	0.1375	0.1375	0.1375	0.1375	0.1375	0.1375	0.1375	0.1375	0.1375	0.1375	0.1375
ENSG00000171951	SCG2	0.3066	0.1918	0.1375	0.2179	0.1375	0.1375	0.2746	0.3199	0.2716	0.1375	0.2129	0.3114	0.1375	0.1375
ENSG00000178718	RPP25	0.4387	0.7124	0.4188	0.2556	0.3953	0.2872	1.53	2.2639	1.0692	0.6107	0.676	0.2982	2.0738	0.7889
ENSG00000258949	AL049870.3	0.1375	0.1375	0.1375	0.1375	0.1375	0.1375	0.1375	0.1375	0.1375	0.1375	0.1375	0.1375	0.1375	0.1375
ENSG00000100387	RBX1	2.3988	2.5462	2.4454	2.4934	3.273	2.6214	4.2466	3.2516	4.3065	4.4094	4.1905	3.7417	4.1322	2.918
ENSG00000224988	AL158207.1	1.5491	1.969	0.6878	1.1374	0.3648	0.3705	0.658	0.8919	0.7061	0.1375	0.7729	0.8598	0.1375	0.1375
ENSG00000279297	AP000720.1	0.1375	0.1375	0.1375	0.1375	0.1375	0.1375	0.1375	0.1375	0.1375	0.1375	0.1375	0.1375	0.1375	0.1375
ENSG00000249407	IL20RB-AS1	0.1375	0.1375	0.1375	0.1375	0.1375	0.1375	0.1375	0.1375	0.1375	0.1375	0.1375	0.1375	0.1375	0.1375
ENSG00000020129	NCDN	1.5335	2.5722	1.3113	1.1125	1.6454	1.4649	3.7194	3.8463	2.7104	0.9481	2.3792	3.0042	1.3548	2.5839
ENSG00000213741	RPS29	7.2086	7.1857	6.9649	6.9767	6.6871	5.8879	7.6227	5.6983	7.6197	8.1567	7.3335	5.998	8.8401	8.0564
ENSG00000284395	AL032819.3	0.1375	0.4011	0.1375	0.1375	0.1375	0.1375	0.3605	0.3291	0.3221	0.1375	0.1375	0.1375	0.1375	0.1375
ENSG00000250839	AC018710.1	0.1375	0.1375	0.1375	0.1375	0.1375	0.1375	0.1375	0.1375	0.1375	0.1375	0.1375	0.1375	0.1375	0.1375
ENSG00000083457	ITGAE	2.2704	3.164	1.7193	1.737	2.3434	1.6028	2.8551	2.9682	3.3141	3.4162	3.0867	3.5184	5.142	0.1375
ENSG00000200437	RNU6-799P	0.1375	0.1375	0.1375	0.1375	0.1375	0.1375	0.1375	0.1375	0.1375	0.1375	0.1375	0.1375	0.1375	0.1375
ENSG00000236216	PPP1R11P1	0.1375	0.1375	0.1375	0.1375	0.1375	0.1375	0.1375	0.1375	0.1375	0.1375	0.1375	0.1375	0.1375	0.1375
ENSG00000243648	AC109454.1	3.3966	3.3002	2.427	3.1624	1.486	1.1506	1.1099	2.3995	2.6321	0.9949	0.8777	0.9989	1.9503	0.1375
ENSG00000165084	C8orf34	0.1375	0.1375	0.1375	0.1375	0.15	0.1375	1.3961	0.9757	2.1409	1.6455	0.1375	0.1375	0.1375	0.6873
ENSG00000262919	CCNQ	1.3402	2.107	0.8768	0.9364	1.4675	1.3324	2.5742	3.1367	3.1077	3.8713	2.356	2.9193	2.3102	1.3592
ENSG00000028839	TBPL1	1.4734	1.6009	0.8749	1.3819	1.6844	1.2703	2.016	1.5152	3.7247	1.6881	2.2534	1.9454	1.0928	0.1375
ENSG00000203995	ZYG11A	0.1805	0.1375	0.1375	0.1375	0.1375	0.1783	0.1785	0.1375	0.8756	0.1375	0.1375	0.2015	0.1375	0.1375
ENSG00000213880	RPL7AP7	0.1375	0.1375	0.1375	0.1375	0.1375	0.1375	0.1375	0.1375	0.1375	0.1375	0.1375	0.1375	0.1375	0.1375
ENSG00000262888	AC005736.2	0.1375	0.1375	0.1375	0.1375	0.1375	0.1375	0.1375	0.1375	0.1375	0.1375	0.2212	0.1375	0.1375	0.1375
ENSG00000265483	MIR4443	0.1375	0.1375	0.1375	0.1375	0.1375	0.1375	0.1375	0.1375	0.1375	0.1375	0.1375	0.1375	0.1375	0.1375
ENSG00000100038	TOP3B	1.724	1.8173	1.4776	1.8875	1.7595	1.747	2.9698	4.011	2.5131	3.1797	3.1609	3.4939	1.5045	2.4205
ENSG00000261739	GOLGA8S	0.1375	0.1375	0.1375	0.1375	0.1375	0.1375	0.1375	0.1588	0.1375	0.1375	0.1375	0.1375	0.1375	0.1375
ENSG00000225209	AC092637.1	0.1375	0.1375	0.1375	0.1375	0.1375	0.1375	0.1375	0.1375	0.1375	0.1375	0.1375	0.1375	0.1375	0.1375
ENSG00000151640	DPYSL4	0.2217	0.1375	0.1375	0.1375	0.1375	0.1375	0.455	0.2654	0.1375	0.1375	0.2568	0.1375	0.1375	0.1375
ENSG00000121236	TRIM6	0.4124	0.4586	0.2895	0.2267	0.5626	0.6305	1.4145	1.5115	0.5275	0.2995	0.8827	0.7521	0.3383	1.1489
ENSG00000230051	AL020994.2	0.1375	0.1375	0.1375	0.1375	0.1375	0.1375	0.1375	0.1375	0.1375	0.1375	0.1375	0.1375	0.1375	0.1375
ENSG00000254862	AC100771.2	0.1375	0.1375	0.1375	0.1375	0.1375	0.1375	0.1375	0.1375	0.1375	0.1375	0.1375	0.1375	0.1375	0.1375
ENSG00000269588	AC011500.2	0.1375	0.1375	0.1375	0.1375	0.1375	0.1375	0.1375	0.1375	0.1375	0.1375	0.3342	1.114	0.1375	0.1375
ENSG00000157884	CIB4	0.1375	0.1375	0.1375	0.1375	0.1375	0.1375	0.1375	0.1375	0.1375	0.1375	0.1375	0.1375	0.1375	0.1375
ENSG00000244485	RPL18P13	0.1375	0.1375	0.1375	0.1375	0.1375	0.1375	0.1375	0.1375	0.1375	0.1375	0.1375	0.1375	0.1375	0.1375
ENSG00000278287	DLEU2_5	0.1375	0.1375	0.1375	0.1375	0.1375	0.1375	0.1375	0.1375	0.1375	0.1375	0.1375	0.1375	0.1375	0.1375
ENSG00000236539	HNRNPA1P54	0.1375	0.1375	0.1465	0.1375	0.1396	0.1398	0.1375	0.1422	0.1375	0.1375	0.1375	0.1725	0.1375	0.1375
ENSG00000280333	AC090617.10	1.0102	0.5851	0.9024	1.1187	0.1375	0.1934	0.1375	1.1138	1.4809	0.1375	1.2059	1.2109	2.1601	0.1375
ENSG00000258052	AC025263.2	0.1375	0.1375	0.1375	0.1375	0.1375	0.1375	0.1375	0.1375	0.1375	0.1375	0.1375	0.1375	0.1375	0.1375
ENSG00000221676	RNU6ATAC	5.8861	4.3517	5.9629	6.4047	5.5769	5.4893	2.5435	3.8813	4.6255	4.7025	5.0073	5.2949	3.4935	4.6715
ENSG00000226210	AC215219.1	0.9529	1.1514	1.2487	1.1108	1.3829	1.7121	1.9906	2.5548	2.1953	2.1732	2.5774	3.2709	2.5072	2.3698
ENSG00000136367	ZFHX2	1.4435	1.7957	0.6268	0.8118	0.3454	0.3392	1.4676	1.9373	3.7207	2.0893	0.4094	0.5383	0.8715	0.4887
ENSG00000168172	HOOK3	2.2381	2.9921	2.9088	3.3074	2.5884	2.9738	2.9861	2.9759	3.6757	3.0265	3.1605	4.0397	4.0126	3.0005
ENSG00000166407	LMO1	0.1375	0.1375	0.1375	0.1375	0.1375	0.1375	0.2746	0.1375	0.1375	0.1375	0.1375	0.1375	0.1375	0.1375
ENSG00000251035	WBP1LP4	0.1375	0.1375	0.1375	0.1375	0.1375	0.1375	0.1375	0.1375	0.1375	0.1375	0.1375	0.1375	0.1375	0.1375
ENSG00000207739	MIR218-2	0.1375	0.1375	0.2607	0.1375	0.1375	0.1375	0.1375	0.1375	0.1375	0.1375	0.1375	0.1375	0.1375	0.1375
ENSG00000278517	MIR6865	0.9206	0.1948	0.1375	0.9466	1.0609	1.06	0.1375	1.1798	0.1375	0.1375	0.3519	1.1538	0.1375	0.1375
ENSG00000109689	STIM2	2.2386	2.3014	2.5762	2.5838	2.2761	1.9946	3.0776	3.3532	4.6442	3.6653	2.9667	3.5711	2.0071	2.3707
ENSG00000095587	TLL2	0.3227	0.6088	0.2965	0.2449	0.171	0.2378	0.1375	0.1375	0.1375	0.2935	0.3984	0.6757	0.2275	0.1375
ENSG00000225349	AC022080.2	0.1375	0.1375	0.3446	0.1375	0.1375	0.3073	0.1375	0.6763	0.5082	0.1375	0.5667	0.1375	0.9919	0.1375
ENSG00000229824	RPL12P34	0.1375	0.1375	0.1375	0.1375	0.1375	0.1375	0.1375	0.1375	0.1375	0.1375	0.1375	0.1375	0.1375	0.1375
ENSG00000253010	RN7SKP256	0.1375	0.1375	0.1375	0.1375	0.1375	0.1375	0.1375	0.1375	0.1375	0.1375	0.1375	0.1375	0.1375	0.1375
ENSG00000185361	TNFAIP8L1	1.4236	1.892	1.8379	1.6572	1.3873	0.9696	3.4548	3.5987	7.6013	7.2104	2.2835	2.4225	2.2536	1.9764
ENSG00000106211	HSPB1	7.1765	7.4	5.6575	5.5756	4.6601	4.2398	7.0578	7.6068	6.3925	6.623	7.5356	8.0073	6.189	7.4943
ENSG00000186469	GNG2	8.3593	8.5312	8.0564	8.7375	6.9333	7.0062	5.9769	6.0463	5.8631	5.8123	5.6084	5.9737	5.7462	5.9245
ENSG00000232028	AC007391.1	0.2705	0.1375	0.1375	0.1375	0.1375	0.1375	0.1375	0.5026	0.1375	0.1375	0.1375	0.1375	0.1375	0.1375
ENSG00000270175	AC023509.4	2.4427	2.7792	1.0095	1.6523	0.5477	1.1057	1.0335	1.853	1.6695	0.1375	1.5724	2.398	0.1375	0.1375
ENSG00000276520	CR589904.2	0.1375	0.1375	0.1375	0.1375	0.1375	0.1375	0.1375	0.1375	0.1375	0.1375	0.1375	0.1375	0.1375	0.1375
ENSG00000267634	RPL7L1P5	0.1375	0.1375	0.1375	0.1375	0.1375	0.1375	0.2574	0.1375	0.1375	0.1375	0.1375	0.1375	0.1375	0.1375
ENSG00000253105	AP003548.1	0.1375	0.1375	0.1375	0.1375	0.1375	0.1375	0.1375	0.1375	0.1375	0.1375	0.1375	0.1375	0.1375	0.1375
ENSG00000229970	AC007128.1	0.1375	0.1375	0.1375	0.1375	0.1375	0.1375	0.1375	0.1375	0.1375	0.1375	0.1962	0.1375	0.1375	0.1375
ENSG00000163633	C4orf36	1.4634	1.5718	0.5567	0.7288	1.7	1.854	2.8573	3.3309	3.8091	4.0597	4.5491	4.7006	2.3597	2.706
ENSG00000229417	NPM1P25	0.1831	0.2176	0.1375	0.1989	0.1897	0.1589	0.5172	0.2781	0.6749	0.6966	1.0191	1.8428	0.1375	0.1375
ENSG00000187952	HS6ST1P1	0.1375	0.2479	0.1375	0.2213	0.2789	0.1375	0.9247	0.5516	0.6283	0.1375	0.3368	0.7819	0.6377	0.1375
ENSG00000259178	AC023906.2	1.1575	1.3769	0.6984	0.1375	0.1375	0.1375	0.1375	0.1375	0.1375	0.1375	0.1375	0.1375	0.1375	0.1375
ENSG00000239793	AC098818.1	0.2864	0.1375	0.1375	0.1375	0.1375	0.6802	0.1375	0.4168	0.4562	0.1375	0.1375	0.1375	0.1375	0.1375
ENSG00000163661	PTX3	4.1301	4.3472	4.2173	3.6327	1.6949	1.8425	3.3245	4.5523	3.5118	4.492	3.4194	3.689	3.1418	5.129
ENSG00000248375	AC104066.1	0.1375	0.1375	0.1375	0.1375	0.1375	0.1375	0.2562	0.1375	0.1375	0.1375	0.2232	0.1375	0.1375	0.1375
ENSG00000279283	AC131009.4	1.1259	1.4242	1.4313	1.7134	3.2083	3.3673	2.2861	3.0137	1.8468	1.3135	2.119	2.8436	2.5261	2.4072
ENSG00000253731	PCDHGA6	0.1763	0.1628	0.1375	0.1375	0.1697	0.1375	0.186	0.1375	0.2855	0.2366	0.1723	0.2207	0.1375	0.1375
ENSG00000259072	AL161751.1	0.1375	0.1375	0.1375	0.1375	0.1375	0.1375	0.1375	0.1375	0.1375	0.1375	0.1375	0.1375	0.1375	0.1375
ENSG00000252097	RNU6-346P	0.1375	0.1375	0.1375	0.1375	0.1375	0.1375	0.1375	0.1375	0.1375	0.1375	0.1375	0.1375	0.1375	0.1375
ENSG00000268997	DNAJC19P3	0.4075	0.1375	0.1375	0.1375	0.1375	0.1375	0.1375	0.1375	0.1375	0.1375	0.1375	0.1375	0.1375	0.1375
ENSG00000166913	YWHAB	4.394	4.4554	3.9561	4.2133	4.1833	4.1276	3.9294	3.9833	4.1589	5.7744	4.8032	5.588	5.6997	5.3372
ENSG00000257331	RACGAP1P	0.1375	0.1375	0.1375	0.1375	0.1375	0.1375	0.1375	0.1375	0.1375	0.1375	0.1375	0.1375	0.1375	0.1375
ENSG00000126822	PLEKHG3	2.2033	2.8524	2.8567	2.6822	3.6841	3.6279	3.5896	4.7474	3.2637	2.2169	2.4249	3.5072	2.104	5.6007
ENSG00000203434	AL353740.1	0.1375	0.1375	0.1375	0.1375	0.1375	0.1375	0.1375	0.1375	0.1375	0.1375	0.1375	0.1375	0.1375	0.1375
ENSG00000261824	LINC00662	0.7997	1.192	0.6935	0.311	0.7896	0.4986	1.3297	1.1382	2.2808	0.3755	0.8713	1.0563	0.5757	0.1375
ENSG00000177398	UMODL1	0.1715	0.1375	0.1375	0.1375	0.1375	0.1375	0.1648	0.1375	1.1249	0.1375	0.1375	0.1375	0.1375	0.1375
ENSG00000260803	Z84723.1	0.3706	0.4119	0.2522	0.6203	0.2285	0.1375	0.1785	0.1375	1.5765	0.1375	0.1725	0.1375	1.3482	0.1375
ENSG00000238158	AL391422.2	0.1375	0.1375	0.1375	0.1375	0.1375	0.1375	0.1375	0.1375	0.1375	0.1375	0.1375	0.1375	0.1375	0.1375
ENSG00000177842	ZNF620	0.2595	0.2224	0.1375	0.199	0.1652	0.1908	0.9916	0.9676	1.1624	1.3635	0.8427	0.5107	0.1375	0.1375
ENSG00000136488	CSH1	0.1375	0.1375	0.1375	0.1375	0.1375	0.1375	0.1375	0.1375	0.1375	0.1375	0.1375	0.1375	0.1375	0.1375
ENSG00000242140	AC083904.1	0.1375	0.1375	0.1375	0.1375	0.1375	0.1375	0.1375	0.1375	0.1375	0.1375	0.1375	0.1375	0.1375	0.1375
ENSG00000233120	USP9YP15	0.1375	0.1375	0.1375	0.1375	0.1375	0.1375	0.1375	0.1375	0.1375	0.1375	0.1375	0.1375	0.1375	0.1375
ENSG00000270273	AC121334.2	0.3511	0.1375	0.1375	0.1375	0.1375	0.1375	0.1375	0.1375	0.1375	0.1375	0.1375	0.1375	0.1375	0.1375
ENSG00000027697	IFNGR1	6.88	7.3109	6.5213	7.0801	7.4384	7.495	5.327	5.6181	7.443	6.132	5.7203	5.8277	6.5366	5.5759
ENSG00000119986	AVPI1	2.6152	2.5757	2.6223	2.0233	2.4195	2.3952	4.3641	4.8357	2.5166	3.6874	4.8719	5.0412	4.2993	3.422
ENSG00000200742	Y_RNA	0.8873	0.4794	0.1375	0.9998	1.0095	0.3095	1.4747	0.1375	0.1375	0.1375	1.6892	0.7389	0.1375	0.1375
ENSG00000225399	AC121247.1	0.4306	0.5917	0.3195	0.3018	0.3448	0.4049	0.2101	0.1375	0.4033	0.1375	0.1375	0.411	0.1375	0.1375
ENSG00000233115	FAM90A11P	0.1375	0.1375	0.1375	0.1375	0.1375	0.1375	0.1375	0.1375	0.1375	0.1375	0.1375	0.1375	0.1375	0.1375
ENSG00000262609	BTF3P14	0.1375	0.1375	0.1375	0.1375	0.1375	0.1375	0.1375	0.1375	0.1375	0.1375	0.1375	0.1375	0.1375	0.1375
ENSG00000165506	DNAAF2	1.9785	2.53	0.6683	0.5372	0.7044	0.4043	2.8927	3.0805	5.6087	4.7552	1.45	1.9381	0.891	2.1057
ENSG00000257556	LINC02298	0.2172	0.5042	0.1375	0.1375	0.1375	0.1375	0.8577	0.1375	0.3127	0.1375	0.1935	0.1375	0.1375	0.1375
ENSG00000103496	STX4	8.2969	9.3947	7.9682	7.9982	6.7733	7.1975	7.356	8.4242	7.1958	7.3159	7.8178	8.5862	7.951	7.4956
ENSG00000232909	AL157823.2	0.1375	0.1375	0.1375	0.1375	0.1375	0.1375	0.1375	0.1375	0.1375	0.1375	0.1375	0.1375	0.1375	0.1375
ENSG00000174990	CA5A	0.1375	0.1375	0.1375	0.1375	0.1375	0.1627	0.1375	0.1683	0.1612	0.1375	0.1618	0.1375	0.1375	0.1375
ENSG00000213177	PRDX2P4	0.1375	0.1375	0.1375	0.1375	0.1375	0.1375	0.1375	0.1375	0.1375	0.1375	0.1375	0.1375	0.1375	0.1375
ENSG00000256285	OSBPL9P5	0.1375	0.1375	0.1375	0.1375	0.32	0.1375	0.1375	0.1375	0.1375	0.1375	1.1215	0.1375	0.1375	0.1375
ENSG00000279551	AC025263.3	0.1375	0.1375	0.1375	0.1375	0.1375	0.1375	0.1375	0.1375	0.1375	0.1375	0.1375	0.1375	0.1375	0.1375
ENSG00000220517	ASS1P1	0.9715	1.3347	0.4918	0.6411	0.2086	0.3872	1.6238	1.7908	0.913	1.1233	1.2004	1.625	1.0026	0.1375
ENSG00000101782	RIOK3	3.9088	4.446	3.5629	4.0991	4.4363	4.2925	4.6201	3.9395	5.9143	5.1998	4.4109	4.9241	5.0522	6.295
ENSG00000267787	AC027097.2	0.6455	0.7394	0.6476	0.469	0.832	0.5694	1.1388	1.6547	0.388	0.1375	1.2292	1.3977	0.9582	0.1375
ENSG00000118855	MFSD1	6.4144	6.9778	5.2311	5.5564	5.0878	5.1584	5.371	6.1643	6.2024	5.5801	6.0757	6.3114	6.9077	5.441
ENSG00000147100	SLC16A2	0.1563	0.1375	0.1375	0.1375	0.1375	0.1375	0.2545	0.1375	0.2225	0.1375	0.1534	0.1375	0.1375	0.9969
ENSG00000259392	AC090877.1	1.5696	2.2589	0.8412	1.325	1.0888	0.7149	2.3917	2.6379	1.5536	2.4293	3.0761	3.9294	2.6692	0.1375
ENSG00000273142	AC073335.2	2.9717	4.1416	3.2403	3.1329	2.049	2.4044	2.561	2.6093	2.5037	1.5981	1.116	1.1866	3.1566	3.3123
ENSG00000163499	CRYBA2	0.1375	0.1375	0.1375	0.1375	0.2369	0.1375	0.1375	0.1375	0.1375	0.1375	0.1375	0.1375	0.1375	0.1375
ENSG00000137460	FHDC1	3.1267	3.774	2.492	2.4581	1.5498	1.652	1.507	1.8056	4.161	3.7924	0.5294	0.7613	1.8136	2.6427
ENSG00000258121	AC089987.3	0.1375	0.1375	0.1375	0.1375	0.1375	0.1375	0.1375	0.1375	0.3217	0.1375	0.1375	0.1375	0.1375	0.1375
ENSG00000219133	AL592114.1	1.102	1.2616	1.4064	1.7853	0.3262	0.4384	0.6147	0.2632	0.9132	0.7907	0.2054	0.4864	0.1375	0.1375
ENSG00000158639	PAGE5	0.1375	0.1375	0.1375	0.1375	0.1375	0.1375	0.1375	0.1375	0.1375	0.1375	0.1375	0.1375	0.1375	0.1375
ENSG00000138078	PREPL	1.4243	1.8206	1.5026	1.7843	0.9524	1.0636	2.1076	1.9478	4.9906	2.9093	1.6593	1.1293	1.5115	2.7516
ENSG00000240972	MIF	5.2232	5.3534	5.2463	5.1049	4.3058	3.9201	4.8693	4.6595	5.7022	5.655	5.1601	5.3887	5.9171	6.1815
ENSG00000231280	SALL4P6	0.1375	0.1375	0.1375	0.1375	0.1375	0.1375	0.1375	0.1375	0.1375	0.1375	0.1375	0.1375	0.1375	0.1375
ENSG00000257376	AC079601.2	0.1375	0.1375	0.1375	0.1375	0.1375	0.1375	0.1375	0.1375	0.1375	0.1375	0.1375	0.1375	0.1375	0.1375
ENSG00000200917	RNU6-553P	0.1375	0.1375	0.1375	0.1375	0.1375	0.1375	0.1375	0.1375	0.1375	0.1375	0.1375	0.1375	0.1375	0.1375
ENSG00000238622	SNORD97	2.9118	1.5027	3.2105	1.1298	0.8044	2.4969	0.3921	2.483	0.3959	1.3225	1.5312	0.4223	1.7405	0.1375
ENSG00000171462	DLK2	0.1375	0.1375	0.1375	0.1375	0.1375	0.1375	0.3679	0.1375	0.4433	0.1375	0.1375	0.1375	0.1375	0.1375
ENSG00000256039	LINC02446	1.7268	1.7914	1.0239	1.0095	0.5051	0.7142	2.8338	2.738	0.1375	1.0826	3.2788	3.6737	0.7987	0.1375
ENSG00000258754	LINC01579	0.1375	0.1375	0.1375	0.1654	0.1441	0.1375	0.1815	0.1375	0.2979	0.1375	0.1375	0.1375	0.1375	0.1375
ENSG00000152932	RAB3C	0.1375	0.1573	0.1375	0.5227	0.2608	0.1375	0.1478	0.1375	0.1775	0.1375	0.1449	0.1375	0.1375	0.1375
ENSG00000274984	Y_RNA	0.1375	0.1375	0.1375	0.1375	0.1375	0.1375	0.1375	0.1375	0.1375	0.1375	0.1375	0.1375	0.1375	0.1375
ENSG00000254684	AP002803.1	0.1375	0.1375	0.1375	0.1375	0.1375	0.1375	0.1375	0.1375	0.1375	0.1375	0.1375	0.4496	0.1375	0.1375
ENSG00000266594	MIR4766	0.1375	0.1375	0.1375	0.1375	0.1375	0.1375	0.6243	0.1375	0.1375	0.1375	0.1375	0.1375	0.1375	3.6851
ENSG00000249661	TNRC18P1	2.2226	3.5827	0.9723	1.3975	0.9358	0.9423	2.4886	4.312	0.9478	2.4817	3.4623	3.9665	2.8149	1.0988
ENSG00000279659	AL451064.2	0.1375	0.2223	0.1375	0.1375	0.1375	0.1375	0.1375	0.1375	0.1375	0.1375	0.1375	0.1375	0.1375	0.1375
ENSG00000166856	GPR182	0.1375	0.1375	0.1375	0.1375	0.1375	0.1375	0.1375	0.1375	0.1375	0.1375	0.1375	0.1375	0.1375	0.1375
ENSG00000226445	BX322234.1	0.1375	0.1375	0.1375	0.1375	0.1375	0.1375	0.4939	1.4145	0.7347	0.1375	0.5583	0.7451	0.1375	0.1375
ENSG00000251851	RNU6-772P	0.1375	0.1375	0.1375	0.1375	0.1375	0.1375	0.1375	0.1375	0.1375	0.1375	0.1375	0.1375	0.1375	0.1375
ENSG00000284112	MIR195	0.1375	0.1375	0.1375	0.1375	0.1375	0.1375	0.2457	0.1375	0.1375	0.1375	0.1837	0.1375	0.1375	0.1375
ENSG00000257193	LINC02385	0.1375	0.1375	0.1375	0.1375	0.1375	0.1375	0.1375	0.1375	0.1375	0.1375	0.1375	0.1375	0.1375	0.1375
ENSG00000258175	LINC02300	0.1375	0.1375	0.1375	0.1375	0.1375	0.1375	0.8703	0.1375	3.6827	2.0389	0.1375	0.1375	0.1375	0.1375
ENSG00000263450	AC090371.1	0.1375	0.1375	0.1375	0.1375	0.1375	0.1375	1.0452	0.524	3.2344	0.1375	0.1375	0.1375	0.1375	0.1375
ENSG00000237972	TUBG1P	0.2487	0.1375	0.1375	0.1375	0.1375	0.1375	0.1375	0.1375	0.1375	0.1375	0.1375	0.2592	0.1375	0.1375
ENSG00000275068	U6	0.1375	0.1375	0.1375	0.1375	0.1375	0.1375	0.1375	0.1375	0.1375	0.1375	0.1375	0.1375	0.1375	0.1375
ENSG00000277250	Metazoa_SRP	0.1375	0.4585	0.1375	0.1375	0.1375	0.1375	0.1375	1.3655	0.5894	0.1375	0.3187	0.1375	0.1375	0.1375
ENSG00000252993	SNORA25	0.1375	0.1375	0.1375	0.1375	0.1375	0.1375	0.1375	0.1375	0.1375	0.1375	0.1375	0.1375	0.1375	0.1375
ENSG00000224505	AC138150.1	1.4427	0.1375	0.9375	0.7105	1.1138	1.7744	0.9157	0.8173	1.3449	0.8275	1.8807	0.4123	1.3487	0.1375
ENSG00000129159	KCNC1	0.1375	0.1375	0.1375	0.1375	0.1375	0.1375	0.1375	0.1375	0.1375	0.1375	0.1375	0.1375	0.1375	0.1375
ENSG00000273573	Metazoa_SRP	1.6161	2.8721	1.7767	1.3108	1.1729	2.2837	0.827	0.7887	0.1375	0.1375	0.6688	0.6503	0.1375	0.1375
ENSG00000257999	AC016257.1	0.2363	0.1375	0.1375	0.1375	0.1375	0.1375	0.2756	0.1375	0.1375	0.1375	0.2906	0.1375	0.1375	0.1375
ENSG00000226301	PDCL3P1	0.1375	0.1375	0.1375	0.1375	0.1375	0.1375	0.1375	0.1375	0.1375	0.1375	0.1375	0.1375	0.1375	0.1375
ENSG00000185088	RPS27L	1.9631	2.2005	1.1632	1.4352	1.6125	1.8587	3.4074	3.3607	2.8722	3.3936	3.4705	3.6603	3.3172	2.035
ENSG00000259181	AC114546.1	0.1375	0.1375	0.1375	0.1375	0.1375	0.1375	0.1375	0.1375	0.1375	0.1375	0.1375	0.1375	0.1375	0.1375
ENSG00000208023	MIR185	0.8946	0.8465	0.5	0.1375	1.4701	1.7809	0.2928	2.3868	0.6283	0.1375	1.6981	2.3984	0.1375	0.1375
ENSG00000099866	MADCAM1	0.8747	0.881	0.5933	0.5922	1.7092	1.5796	1.1726	1.5985	1.4369	0.1375	0.4599	0.7111	1.0547	0.1375
ENSG00000243403	AC090543.2	0.5301	0.9845	0.5114	0.3483	1.6041	1.2931	0.6108	0.7182	1.0957	0.1375	1.3906	0.7806	1.4361	0.1375
ENSG00000178462	TUBAL3	0.1375	0.1375	0.1375	0.1375	0.1375	0.1375	0.2764	0.1375	0.6396	0.4249	0.1375	0.1375	0.1375	0.1375
ENSG00000253074	RNU6-586P	0.1375	0.1375	0.1375	0.1375	0.1375	0.1375	0.1375	0.1375	0.1375	0.1375	0.1375	0.1375	0.1375	0.1375
ENSG00000235931	LINC01553	0.1375	0.1375	0.1375	0.1375	0.1375	0.1375	0.1375	0.1375	0.1375	0.1375	0.1375	0.1375	0.1375	0.1375
ENSG00000273659	AC108125.1	0.1375	0.1375	0.1375	0.1375	0.1375	0.1375	0.1375	0.1375	0.1375	0.1375	0.1375	0.1375	0.1375	0.1375
ENSG00000039600	SOX30	0.1375	0.1375	0.1375	0.1375	0.1375	0.1375	0.271	0.1759	0.8569	0.1375	0.3482	0.5566	0.1375	0.1375
ENSG00000266315	MIR4668	2.5531	2.7194	0.4311	1.4882	3.542	4.0331	1.3246	1.1673	1.9018	0.1375	0.7297	0.9786	0.8378	0.1375
ENSG00000230969	LINC02090	0.1375	0.1375	0.1375	0.1375	0.1375	0.1375	0.1375	0.1375	0.1375	0.1375	0.1375	0.1375	0.1375	0.1375
ENSG00000254206	NPIPB11	0.257	0.264	0.227	0.2846	0.268	0.2045	0.4789	0.4497	0.2086	0.4251	0.4306	0.5812	0.1375	0.1375
ENSG00000126106	TMEM53	0.2616	0.6069	0.3534	0.3314	0.7769	0.5167	1.8977	2.5159	2.9677	1.2652	1.2935	0.8263	1.6826	0.1375
ENSG00000106133	NSUN5P2	0.2409	0.4503	0.5387	0.3243	0.7246	0.3694	1.3222	1.4921	1.2007	0.1375	0.7979	1.0907	0.9774	2.1082
ENSG00000162747	FCGR3B	7.8018	8.111	7.3215	7.4734	9.1414	9.1512	7.9068	8.459	8.1962	6.4572	6.2679	7.5304	7.3012	8.8476
ENSG00000265465	MIR4768	0.1375	0.1375	0.1375	0.3743	0.1375	0.1375	0.1375	0.1375	0.1375	0.1375	0.1375	0.1375	0.1375	0.1375
ENSG00000071282	LMCD1	0.2721	0.3202	0.1655	0.1753	0.1537	0.1547	1.172	1.6794	0.3829	0.1375	0.1833	0.284	2.0874	4.7312
ENSG00000170537	TMC7	0.1637	0.1375	0.1375	0.1375	0.1375	0.1584	0.3607	0.1375	0.8929	0.3643	0.1617	0.1375	0.4295	0.1375
ENSG00000275469	MIR6130	0.1375	0.1375	0.1375	0.1375	0.1375	0.1375	0.1375	0.1375	0.1375	0.1375	0.1375	0.1375	0.1375	0.1375
ENSG00000114383	TUSC2	2.4746	2.7201	1.9287	2.0226	3.3286	3.3888	3.5691	3.7135	5.2829	4.8874	2.7274	3.0977	3.3202	3.1616
ENSG00000236846	AL359979.2	0.1375	0.1375	0.1375	0.1375	0.3164	0.1375	0.4123	0.1375	0.1375	0.1375	0.1375	0.1375	0.1375	0.1375
ENSG00000243838	PSMC1P7	0.1375	0.1375	0.1375	0.1375	0.1375	0.1375	0.1375	0.1375	0.1375	0.1375	0.1375	0.1375	0.1375	0.1375
ENSG00000237642	HMGB3P5	0.1375	0.1375	0.1375	0.1375	0.1375	0.1375	0.9308	0.5874	0.1375	0.1375	0.1375	0.1375	0.1375	0.1375
ENSG00000229343	CDY22P	0.1375	0.1375	0.1375	0.1375	0.1375	0.1375	0.1375	0.1375	0.1375	0.1375	0.1375	0.1375	0.1375	0.1375
ENSG00000204172	AGAP9	0.3233	0.8841	0.4869	0.4488	0.7189	0.7541	1.8787	2.3664	1.4423	1.3684	1.2378	1.7534	1.0084	0.1375
ENSG00000254141	AC103853.2	0.1375	0.1375	0.1375	0.1375	0.1375	0.1375	0.1375	0.1375	0.1375	0.1375	0.1375	0.1375	0.1375	0.1375
ENSG00000267628	AC104423.1	0.1375	0.1375	0.1375	0.1375	0.1375	0.1375	0.1375	0.1375	0.1375	0.1375	0.1375	0.1375	0.1375	0.1375
ENSG00000264978	RN7SL630P	2.6735	3.59	0.6893	0.452	0.6526	0.8986	2.5834	3.5457	1.3201	0.1375	1.1982	1.314	2.2633	2.2207
ENSG00000234690	AC106869.1	0.1375	0.1375	0.1375	0.1375	0.1375	0.1375	0.1375	0.1375	0.1375	0.1375	0.1375	0.1375	0.1375	0.1375
ENSG00000251476	MTCO1P31	0.1375	0.1375	0.1375	0.1375	0.1375	0.1375	0.1375	0.1661	0.1375	0.1375	0.1375	0.1375	0.1375	0.1375
ENSG00000273388	AC005291.2	0.2684	0.1375	0.1375	0.1375	0.1375	0.1375	0.1375	0.1375	0.1375	0.1375	0.1375	0.1375	0.1375	0.1375
ENSG00000250124	AC016550.3	0.1375	0.1375	0.1375	0.1375	0.1375	0.1375	0.1375	0.1375	0.1375	0.1375	0.1375	0.1375	0.1375	0.1375
ENSG00000231953	AL031432.1	0.1375	0.1375	0.1375	0.1375	0.1375	0.1375	0.1375	0.1375	0.1375	0.1375	0.1375	0.1375	0.1375	0.1375
ENSG00000276048	Six3os1_5	0.1375	0.1375	0.1375	0.1375	0.1375	0.1375	0.1375	0.1375	0.1375	0.1375	0.1375	0.1375	0.1375	0.1375
ENSG00000236257	EI24P2	0.1375	0.1375	0.1375	0.1375	0.1375	0.1375	0.1375	0.1375	0.1375	0.1375	0.1375	0.1375	0.1375	0.1375
ENSG00000041988	THAP3	1.6168	2.299	0.964	1.3396	1.4519	1.602	2.5629	3.3771	2.2387	2.8566	3.3523	3.7957	2.3905	0.1375
ENSG00000189134	NKAPL	0.5832	0.7981	0.401	0.4894	0.4611	0.6293	1.146	1.1843	1.3376	1.2956	1.0552	1.5697	0.5248	1.1812
ENSG00000114124	GRK7	0.277	0.3284	0.2439	0.1935	0.2277	0.3439	0.2996	0.1759	0.3459	0.1375	0.3171	0.5208	0.1375	0.1375
ENSG00000225959	MTND4P3	0.1375	0.1375	0.1375	0.1375	0.1375	0.1375	0.1375	0.1375	0.1375	0.1375	0.1375	0.1375	0.1375	0.1375
ENSG00000237126	AC073254.1	0.1375	0.1375	0.1375	0.1375	0.1375	0.1375	0.1375	0.1375	0.1375	0.1375	0.1375	0.1375	0.1375	0.1375
ENSG00000115942	ORC2	3.2168	3.2377	3.3798	3.4129	3.5576	3.7016	2.2341	2.5353	3.0101	2.4201	1.9188	2.0112	0.897	2.3155
ENSG00000263584	MIR4480	3.6493	4.248	4.2064	4.5042	4.1116	5.1949	3.3037	3.7983	4.7791	4.0126	2.8739	2.3392	5.5327	4.4612
ENSG00000252423	RNU6-229P	0.1375	0.1375	0.1375	0.1375	0.1375	0.1375	0.1375	0.1375	0.1375	0.1375	0.1375	0.1375	0.1375	0.1375
ENSG00000198728	LDB1	3.5117	3.5631	3.6481	3.5504	4.1819	3.9859	4.6873	5.0863	4.628	3.3764	3.7661	4.1713	4.3742	4.74
ENSG00000207261	RNU6-738P	0.1375	0.1375	0.1375	0.1375	0.1375	0.1375	0.1375	0.1375	0.1375	0.1375	0.1375	0.1375	0.1375	0.1375
ENSG00000253454	NDUFA5P2	0.1375	0.1375	0.1375	0.1375	0.1375	0.1375	0.1375	0.1375	0.1375	0.1375	0.1375	0.1375	0.1375	0.1375
ENSG00000176293	ZNF135	0.1375	0.1375	0.1727	0.1375	0.1375	0.1934	0.5468	0.753	1.8476	1.0181	0.1806	0.3928	0.1375	1.1661
ENSG00000267249	AP005482.3	0.3375	0.2782	0.1375	0.1375	0.1375	0.1375	0.1375	0.1375	0.7539	0.1375	0.2244	0.3563	0.1375	0.1375
ENSG00000213661	AC106806.1	0.1375	0.1375	0.1375	0.1375	0.1375	0.1375	0.1375	0.1375	0.1375	0.1375	0.1375	0.1375	0.1375	0.1375
ENSG00000225973	PIGBOS1	1.7306	1.1491	1.4356	1.3815	2.5362	2.2567	2.9067	3.5934	4.0564	3.8429	2.9688	3.2811	2.3131	3.2941
ENSG00000202428	RNU6-108P	0.2939	0.6912	0.1375	0.8983	0.1375	0.1375	0.1375	0.1375	0.1375	0.1375	0.305	0.1375	0.1375	0.1375
ENSG00000188582	PAQR9	0.1375	0.1375	0.1375	0.1375	0.1375	0.1375	0.1375	0.1375	0.1375	0.1375	0.1375	0.2062	0.1375	0.1375
ENSG00000235586	AC011247.2	0.1375	0.1375	0.1375	0.1375	0.1375	0.1375	0.1375	0.1375	0.1375	0.1375	0.7608	1.4113	0.1375	0.1375
ENSG00000156860	FBRS	6.9485	7.6465	7.2016	7.7397	6.4316	6.3869	6.4036	7.5286	6.209	5.9282	6.3347	7.1982	5.7925	6.9085
ENSG00000227073	SDHDP2	0.1375	0.1375	0.1375	0.1375	0.1375	0.1375	0.1375	0.1375	0.1375	0.1375	0.4008	0.1375	0.1375	0.1375
ENSG00000234030	TMEM97P1	1.5734	2.1511	2.0817	2.1411	0.284	0.1375	0.8115	1.668	1.8243	0.1375	1.6373	1.9312	0.5631	0.1375
ENSG00000274818	AC004825.2	1.6956	2.2112	0.4191	1.3698	1.1637	1.5934	1.8932	0.882	1.8457	1.0547	2.7526	2.5127	1.7732	0.1375
ENSG00000261782	AC116553.2	0.1375	0.1375	0.1375	0.1375	0.1375	0.1375	0.1375	0.1375	0.1375	0.1375	0.1375	0.1375	0.1375	0.1375
ENSG00000214908	AL353678.1	0.1375	0.1375	0.1375	0.1375	0.1375	0.1375	0.1375	0.1375	0.1375	0.1375	0.1375	0.1375	0.1375	0.1375
ENSG00000221990	EXOC3-AS1	0.5555	0.8174	0.2758	0.4873	0.4253	0.1962	1.2547	1.1938	2.6491	2.6341	0.5014	0.9369	1.1014	1.7858
ENSG00000251050	AC112184.1	0.1375	0.1375	0.1375	0.1375	0.1375	0.1375	0.1375	0.1375	0.1375	0.1375	0.1375	0.1375	0.1375	0.1375
ENSG00000265432	MIR4308	5.0108	4.9023	5.0808	5.0968	1.3515	2.6243	4.413	4.2997	3.5448	4.5318	5.6078	5.6696	4.5398	0.1375
ENSG00000281720	DUX4L8	0.1375	0.1375	0.1375	0.1375	0.1375	0.1375	0.1375	0.1375	0.1375	0.1375	0.1375	0.1375	0.1375	0.1375
ENSG00000260091	AC093752.3	0.1375	0.2442	0.1375	0.1375	0.2361	0.2404	0.2371	0.271	0.1375	0.1375	0.1375	0.1375	0.1375	0.1375
ENSG00000233724	AL513321.1	0.1375	0.1375	0.1375	0.1375	0.1375	0.1375	0.1375	0.1375	0.1375	0.1375	0.1375	0.1375	0.1375	0.1375
ENSG00000174156	GSTA3	0.1375	0.1375	0.1375	0.1375	0.1375	0.1375	0.5259	0.1375	3.8877	3.624	0.1375	0.1375	0.1375	0.1375
ENSG00000234848	AC008758.2	0.1375	0.1375	0.1375	0.1375	0.1375	0.1375	0.1375	0.1375	0.1375	0.1375	0.1375	0.1375	0.1375	0.1375
ENSG00000233388	AL022334.1	0.1375	0.1375	0.1375	0.1654	0.1375	0.1375	0.1375	0.1375	0.1375	0.1375	0.2309	0.2875	0.1375	0.1375
ENSG00000212418	RNY4P36	1.1009	0.96	0.2999	0.9932	0.6992	0.2764	0.7126	0.1375	0.8129	0.1375	0.447	0.9106	2.5747	0.1375
ENSG00000228489	RPL21P50	0.1375	0.1375	0.1375	0.1375	0.1375	0.1375	0.1375	0.1375	0.1375	0.1375	0.1375	0.1375	0.1375	0.1375
ENSG00000064835	POU1F1	0.1375	0.1375	0.1375	0.1375	0.1375	0.1375	0.1375	0.1375	0.1375	0.1375	0.1375	0.1375	0.1375	0.1375
ENSG00000266826	AC011195.2	0.1894	0.1375	0.1375	0.2074	0.1375	0.1375	0.1375	0.1375	0.1375	0.1375	0.182	0.3527	0.1375	0.1375
ENSG00000206053	JPT2	1.4376	1.2955	1.1575	0.9956	1.0397	1.1458	3.9576	4.2361	5.8817	5.3806	1.4071	1.2566	3.254	4.643
ENSG00000235285	SMIM2-IT1	0.1375	0.1375	0.1375	0.1375	0.1375	0.1375	0.1375	0.1375	0.1375	0.1375	0.1375	0.1375	0.1375	0.1375
ENSG00000238658	RNU6-625P	0.1375	0.9808	0.1375	0.5724	0.4097	0.5169	0.1375	0.1375	0.1375	0.1375	0.2677	0.1375	0.1375	0.1375
ENSG00000228014	ZNF680P1	0.1375	0.1375	0.1375	0.2082	0.1681	0.1375	0.1375	0.1375	0.1375	0.1375	0.1375	0.1375	0.1375	0.1375
ENSG00000182477	OR2B8P	0.1375	0.2673	0.1375	0.2961	0.1375	0.1375	0.1375	0.1375	0.1375	0.1375	0.2074	0.1375	0.1375	0.1375
ENSG00000231901	AL354754.1	0.1375	0.1375	0.1375	0.1375	0.1375	0.1375	1.5161	0.4953	3.2013	3.0325	0.2398	0.1375	0.1375	0.1375
ENSG00000124614	RPS10	6.5422	6.4666	6.1389	6.0321	5.7002	4.9807	6.4135	6.0789	6.9465	7.5667	6.2857	6.5651	7.7481	8.8171
ENSG00000100211	CBY1	0.932	0.9219	0.7087	0.2958	0.7003	0.8284	2.9062	2.848	5.6167	5.097	0.4855	1.1115	1.4256	2.4866
ENSG00000278604	RN7SL429P	0.1375	0.1375	0.1375	0.1375	0.2745	0.1375	0.1375	0.1375	0.1375	0.1375	0.1375	0.1375	0.1375	0.1375
ENSG00000198648	STK39	1.1935	1.4056	1.1294	0.9541	1.2474	1.1343	2.9954	2.4252	3.3039	3.131	1.496	1.8819	2.1616	4.7611
ENSG00000249803	AC112178.1	0.1375	0.1375	0.1375	0.1375	0.1375	0.1375	0.1375	0.1375	0.1375	0.1375	0.1375	0.1375	0.1375	0.1375
ENSG00000119440	LCN1P1	0.1375	0.1375	0.1375	0.1375	0.1375	0.1375	0.1375	0.1375	0.1375	0.1375	0.1375	0.1375	0.1375	0.1375
ENSG00000251635	LINC02278	0.5102	0.1375	0.1375	0.1375	0.1375	0.1375	0.1375	0.1375	0.1375	0.1375	0.1375	0.1375	0.1375	0.1375
ENSG00000257943	AC084879.1	0.1375	0.1375	0.1375	0.1375	0.1375	0.1375	0.1375	0.1375	0.1375	0.1375	0.1375	0.1375	0.1375	0.1375
ENSG00000175467	SART1	3.5981	4.1267	3.4184	3.2688	5.1457	4.9797	4.7348	6.2751	3.4694	4.2956	5.5805	6.4037	4.062	5.6558
ENSG00000246820	AC091013.1	0.1375	0.1375	0.1375	0.1375	0.1375	0.1375	0.1375	0.1375	0.1375	0.1375	0.1375	0.1375	0.1375	0.1375
ENSG00000232130	AC092966.1	0.1375	0.1375	0.1375	0.1375	0.1375	0.1375	0.1375	0.1375	0.1375	0.1375	0.1375	0.1375	0.1375	0.1375
ENSG00000179981	TSHZ1	2.5803	2.8176	1.6889	1.7592	1.8818	1.7046	2.7108	3.5888	2.3975	1.4743	2.1855	2.7144	3.1656	1.57
ENSG00000275894	AL021578.1	2.1134	2.6654	2.4133	1.889	0.7948	1.4994	4.679	4.8033	3.9724	5.0118	5.4629	5.4649	4.807	1.919
ENSG00000096070	BRPF3	3.7927	4.4918	3.7216	4.0412	3.3111	3.4141	3.8821	4.8749	3.8276	2.6782	3.4063	3.7977	4.0247	4.4728
ENSG00000154016	GRAP	0.5446	1.0305	0.4747	0.357	0.5842	0.426	1.8164	1.9106	0.8994	0.6889	1.2212	1.7422	1.1603	0.1375
ENSG00000277918	U1	1.0908	0.1375	2.0911	2.3215	1.9762	0.9843	2.2899	2.0602	0.1375	1.9304	0.9501	2.3526	3.5603	0.1375
ENSG00000236993	GAPDHP21	0.1375	0.1375	0.1375	0.1375	0.1375	0.1375	0.1375	0.1375	0.1375	0.1375	0.1375	0.1375	0.1375	0.1375
ENSG00000215035	FDPSP5	0.1375	0.1375	0.1375	0.1375	0.1375	0.1375	0.1375	0.1375	0.1375	0.1375	0.1375	0.1375	0.1375	0.1375
ENSG00000253805	AC245164.1	0.1375	0.1375	0.1375	0.1375	0.3115	0.1375	0.1375	0.1375	0.1375	0.1375	0.1375	0.1375	0.1375	0.1375
ENSG00000260524	CYP3A52P	0.1375	0.1375	0.1375	0.1375	0.1375	0.1375	0.1375	0.1375	0.1375	0.1375	0.1375	0.1375	0.1375	0.1375
ENSG00000254246	AC011377.1	0.1375	0.1375	0.1375	0.1375	0.1375	0.1375	0.1375	0.1375	0.1375	0.1375	0.1375	0.1375	0.1375	0.1375
ENSG00000256802	AC022613.1	0.1375	0.1375	0.1375	0.1375	0.1375	0.1375	0.1375	0.1375	0.1375	0.1375	0.1375	0.1375	0.1375	0.1375
ENSG00000114656	KIAA1257	2.316	2.7475	2.0805	2.086	1.1828	1.7101	0.8892	1.5347	3.6395	1.7698	0.2522	0.3671	1.6135	1.5404
ENSG00000145839	IL9	0.1375	0.1375	0.1375	0.1375	0.1375	0.1375	0.1375	0.1375	0.1375	0.1375	0.1375	0.1375	0.1375	0.1375
ENSG00000189127	ANKRD34B	0.3063	0.2757	0.3567	0.1776	1.0689	0.7846	0.1609	0.1375	0.2257	0.1375	0.1629	0.2021	0.1375	0.1375
ENSG00000232204	TET1P1	0.1375	0.1375	0.1375	0.1375	0.1375	0.1375	0.1375	0.1375	0.1375	0.1375	0.1375	0.1375	0.1375	0.1375
ENSG00000264272	AC100786.1	0.1375	0.1375	0.1375	0.1375	0.1375	0.1375	0.1375	0.1375	0.1375	0.1375	0.1375	0.1375	0.1375	0.1375
ENSG00000281904	AC233263.6	0.1375	0.1375	0.1375	0.1375	0.1375	0.1375	0.1375	0.1375	0.1375	0.1375	0.1375	0.1375	0.1375	0.1375
ENSG00000260090	AC092435.3	0.1375	0.1375	0.1375	0.1375	0.1375	0.1375	0.1375	0.1375	0.1375	0.1375	0.1375	0.1375	0.1375	0.1375
ENSG00000225407	AC025188.1	0.1375	0.1375	0.1375	0.1375	0.1375	0.1375	0.1375	0.1375	0.1375	0.1375	0.1375	0.1375	0.1375	0.1375
ENSG00000250710	OR7E99P	0.1375	0.1375	0.1375	0.1375	0.1375	0.1375	0.1375	0.1375	0.1375	0.1375	0.1375	0.1375	0.1375	0.1375
ENSG00000251689	AC079140.5	0.1375	0.1375	0.1375	0.1375	0.1375	0.1375	0.1375	0.1375	0.1375	0.1375	0.1375	0.1375	0.1375	0.1375
ENSG00000215302	AC127502.1	1.2694	0.6791	0.6226	0.6072	1.1401	0.5822	0.7761	1.9522	1.2317	0.1375	1.2963	1.5049	1.859	0.1375
ENSG00000188483	IER5L	1.1938	2.1117	1.6614	1.8067	2.1979	2.1072	2.931	2.9582	3.478	4.009	3.4095	3.9448	4.0072	3.0285
ENSG00000252039	RNU6-287P	0.1375	0.1375	0.1375	0.1375	0.1375	0.1375	0.1375	0.1375	0.1375	0.1375	0.1375	0.1375	0.1375	0.1375
ENSG00000212482	RNU6-530P	0.1375	0.1375	0.1375	0.1375	0.1375	0.1375	0.635	0.1375	0.1375	0.1375	0.1375	0.1375	0.1375	0.1375
ENSG00000242291	RPL36AP51	0.1375	0.1375	0.1375	0.1375	0.1375	0.1375	0.1375	0.1375	0.1375	0.1375	0.1375	0.1375	0.1375	0.1375
ENSG00000266279	AC135178.4	0.1375	0.1375	0.1375	0.1375	0.1375	0.1375	0.1375	0.1375	0.1375	0.1375	0.1375	0.1375	0.1375	0.1375
ENSG00000245384	CXXC4-AS1	0.1375	0.1375	0.1375	0.1375	0.1375	0.1375	0.1375	0.1375	0.1375	0.1375	0.1375	0.1375	0.1375	0.1375
ENSG00000135720	DYNC1LI2	3.3558	3.8878	3.1348	3.2862	4.2741	4.873	4.3019	5.0717	4.5818	4.3211	4.1563	4.7321	4.1167	3.9156
ENSG00000273956	AC005632.4	0.1375	0.1375	0.1375	0.1375	0.1375	0.1375	0.1375	0.1375	0.1375	0.1375	0.1375	0.1375	0.1375	0.1375
ENSG00000183654	MARCH11	0.1375	0.1375	0.1375	0.1375	0.1375	0.1375	0.1375	0.1375	0.1375	0.1375	0.1375	0.1375	0.1375	0.1375
ENSG00000237441	RGL2	6.1842	6.8683	5.83	5.8911	7.0538	7.0347	6.1179	6.7438	6.0339	5.7475	6.0255	6.5251	5.3678	6.8215
ENSG00000263680	AC007639.1	0.1375	0.1375	0.1375	0.1375	0.1375	0.1375	0.1375	0.1375	0.1375	0.1375	0.1375	0.1375	0.1375	0.1375
ENSG00000258279	LINC00592	0.2657	0.2514	0.1375	0.2486	0.1375	0.1375	0.1375	0.1375	2.204	0.1375	0.1375	0.1375	0.1375	0.1375
ENSG00000280088	AC126474.2	1.9671	2.2322	1.5576	1.7153	2.0249	1.8145	1.7706	1.91	2.6028	1.7543	1.1675	1.6927	2.7414	2.7092
ENSG00000235837	AC073333.1	0.1375	0.1375	0.1375	0.1375	0.1375	0.1375	0.1375	0.1375	0.1375	0.1375	0.1375	0.1375	0.1375	0.1375
ENSG00000262085	OR1P1	0.1375	0.1375	0.1375	0.1375	0.1375	0.1375	0.2281	0.1375	0.1375	0.1375	0.1375	0.1375	0.1375	0.1375
ENSG00000220522	AL590002.1	0.1375	0.1375	0.1375	0.1375	0.1375	0.1375	0.1375	0.1375	0.1375	0.1375	0.1375	0.1375	0.1375	0.1375
ENSG00000207197	SNORD116-12	0.1375	0.1375	0.5442	0.1375	0.1375	0.1375	0.1375	0.1375	0.1375	0.1375	0.1375	0.1375	0.1375	0.1375
ENSG00000258392	RPA2P1	0.1375	0.1375	0.1375	0.1375	0.1375	0.1375	0.1375	0.1375	0.1375	0.1375	0.1375	0.1375	0.1375	0.1375
ENSG00000235930	HSPE1P12	0.1375	0.1375	0.1375	0.1375	0.1375	0.1375	0.1375	0.1375	0.1375	0.1375	0.1375	0.1375	0.1375	0.1375
ENSG00000256763	LINC02467	0.1375	0.1375	0.1375	0.1375	0.1375	0.1375	0.1375	0.1375	0.1375	0.1375	0.1375	0.1375	0.1375	0.1375
ENSG00000114353	GNAI2	7.2341	7.5316	7.5794	7.6127	8.7498	8.8244	7.3681	8.1574	7.5469	7.5003	8.248	8.8216	7.418	8.196
ENSG00000260670	AC134508.1	0.1375	0.1375	0.1375	0.1728	0.1375	0.1375	0.1375	0.1375	0.1375	0.1375	0.1375	0.1375	0.1375	0.1375
ENSG00000130768	SMPDL3B	2.0616	2.005	1.7886	2.1643	1.3861	1.1489	1.8311	2.0306	0.5839	0.6461	1.2932	1.3693	0.1375	0.1375
ENSG00000211792	TRAV14DV4	0.1375	0.1375	0.1375	0.4735	0.1375	0.1375	1.4583	0.1375	0.1375	0.1375	1.5031	0.1375	0.1375	0.1375
ENSG00000259383	AC012414.3	0.1375	0.1375	0.1375	0.1375	0.1375	0.1375	0.1375	0.1375	0.1375	0.1375	0.1375	0.1375	0.1375	0.1375
ENSG00000177202	SPACA4	0.1375	0.1375	0.1375	0.1375	0.1375	0.1375	0.1375	0.1375	0.1375	0.1375	0.1375	0.1375	0.1375	0.1375
ENSG00000267799	MAN1A2P1	0.1375	0.1375	0.1375	0.1375	0.1375	0.1375	0.1375	0.1375	0.1375	0.1375	0.1375	0.1375	0.1375	0.1375
ENSG00000269807	AC007292.3	0.8578	1.1115	0.9788	1.2907	0.1375	0.1375	0.6059	0.1375	0.7655	0.1375	0.7722	0.1375	0.1375	0.1375
ENSG00000188846	RPL14	3.8371	3.6677	2.9035	2.1822	2.9271	2.3415	4.9096	4.454	4.2158	4.7111	4.2374	3.9944	4.7772	5.0805
ENSG00000227066	Z98257.1	0.1689	0.1943	0.2734	0.1375	0.3928	0.3574	0.3603	0.1375	0.1375	0.1375	0.1375	0.1375	0.1375	0.1375
ENSG00000214756	METTL12	2.3626	3.2688	1.7804	1.3384	1.1504	2.8217	3.7595	1.9284	3.4126	3.5293	2.4872	2.2166	3.2843	1.6264
ENSG00000268043	NBPF12	1.1087	1.2234	0.6303	0.6418	0.4226	0.5998	1.3263	1.6681	0.9486	1.3075	1.4641	2.0671	1.3743	0.4553
ENSG00000235258	NDUFB4P6	0.1375	0.1375	0.1375	0.1375	0.1375	0.1375	0.1375	0.1375	0.1375	0.1375	0.1375	0.1375	0.1375	0.1375
ENSG00000207331	RNU6-1263P	0.1375	0.1375	0.5533	0.1375	0.1375	0.1375	0.1375	0.1375	0.1375	0.1375	0.1375	0.1375	0.1375	0.1375
ENSG00000244115	DNAJC25-GNG10	1.9187	1.7053	1.7893	2.7142	2.3517	2.9887	0.7937	0.3523	2.8077	1.7058	1.4486	1.0989	1.4604	1.8705
ENSG00000199169	MIR367	0.1375	0.1375	0.1375	0.1375	0.1375	0.1375	0.1375	0.1375	0.1375	0.1375	0.1375	0.1375	0.1375	0.1375
ENSG00000171792	RHNO1	1.2562	1.6831	0.9562	1.1614	1.1211	0.8873	3.1898	2.8188	3.7158	2.9594	1.9603	2.5301	2.6856	3.3828
ENSG00000110925	CSRNP2	3.0205	3.239	2.7793	2.4359	2.5509	2.5717	4.3462	4.7362	5.079	4.4825	4.3908	5.2701	3.8667	2.4172
ENSG00000283361	AL160396.2	0.1375	0.2915	0.1375	0.1375	0.1375	0.1375	2.9319	3.0789	5.5765	5.1937	0.3422	0.1375	0.1375	0.1375
ENSG00000231569	AL355334.1	0.1375	0.1375	0.1375	0.1375	0.1375	0.1375	0.1375	0.1375	0.1375	0.1375	0.1375	0.1375	0.1375	0.1375
ENSG00000253227	AC090192.2	0.2886	0.1375	0.1375	0.1375	0.1375	0.1375	0.1375	0.1375	0.1375	0.1375	0.1375	0.1375	0.1375	0.1375
ENSG00000177432	NAP1L5	0.5975	0.6922	0.3737	0.3905	0.2502	0.2947	1.1037	0.8957	1.3022	0.1375	1.0499	1.1017	0.4179	0.9446
ENSG00000230371	KARSP2	0.1375	0.1375	0.1375	0.1375	0.1375	0.1375	0.1375	0.1375	0.1375	0.1375	0.1375	0.1375	0.1375	0.1375
ENSG00000230631	AL353152.1	0.1375	0.1375	0.1375	0.1375	0.1375	0.1375	0.1375	0.1375	0.1375	0.1375	0.1375	0.1375	0.1375	0.1375
ENSG00000255968	AC024145.1	0.1375	0.1375	0.1375	0.1375	0.1375	0.1375	0.1375	0.1375	0.1375	0.1375	0.1375	0.1375	0.1375	0.1375
ENSG00000268069	AC004466.1	0.1375	0.1375	0.2325	0.1375	0.2202	0.3058	0.4433	0.522	0.2195	0.1375	0.3878	0.7109	0.1375	0.1375
ENSG00000135299	ANKRD6	1.2481	2.0835	1.1112	1.2274	1.3578	1.6029	2.066	2.5006	2.5947	1.8446	1.5622	2.2254	1.0999	1.6076
ENSG00000283936	MIR3658	0.3265	0.3748	0.1375	0.1375	0.3094	0.1375	0.2164	1.4712	0.2916	0.1375	0.2246	0.2233	0.1375	2.4405
ENSG00000259994	AL353796.1	0.2084	0.2646	0.1375	0.1375	0.187	0.1954	0.2796	0.1375	0.4808	0.4588	0.2176	0.2395	0.1375	0.1375
ENSG00000237927	AL078604.2	6.9882	7.528	5.9094	5.8764	5.1954	5.3026	3.2184	3.5189	2.5709	2.0842	2.8328	2.9501	3.5269	4.1623
ENSG00000200492	U3	0.1375	0.1375	0.1375	0.1375	0.1375	0.1375	0.1375	0.1375	0.1375	0.1375	0.1375	0.1375	0.1375	0.1375
ENSG00000164128	NPY1R	0.1375	0.1375	0.1375	0.1375	0.1375	0.1375	0.1375	0.1375	0.1375	0.1375	0.1375	0.1375	0.1375	0.1375
ENSG00000226533	BTBD9-AS1	0.1375	0.3734	0.1375	0.1375	0.1375	0.1375	0.1375	0.1375	0.1375	0.1375	0.2248	0.5919	0.1375	0.1375
ENSG00000133997	MED6	2.8391	2.9359	1.9953	2.5438	1.9341	2.1521	2.9142	2.6209	3.3926	3.5643	2.9151	3.2714	3.5416	2.4155
ENSG00000105131	EPHX3	1.0785	1.3847	0.5414	0.793	0.3697	0.3474	1.781	1.2089	0.5633	0.1375	0.3101	0.4619	0.4334	2.8608
ENSG00000249649	MRPS33P2	0.1375	0.1375	0.1375	0.1375	0.1375	0.1649	0.1375	0.2759	0.1375	0.1375	0.1375	0.1375	0.1375	0.1375
ENSG00000199470	SNORA64	0.1375	0.1375	0.1375	0.1375	0.1375	0.1375	0.1375	0.1375	0.1375	0.1375	0.1375	0.1375	0.1375	0.1375
ENSG00000217495	AL136116.2	0.1375	0.1375	0.1375	0.1375	0.1375	0.1375	0.1375	0.1375	0.1375	0.1375	0.1375	0.1375	0.1375	0.1375
ENSG00000243359	RN7SL815P	0.1375	0.1375	0.1375	0.1375	0.1375	0.1375	0.1375	0.1375	0.1375	0.1375	0.1375	0.1375	0.1375	0.1375
ENSG00000272256	AC044849.2	4.4972	5.9833	2.4121	2.8224	1.8754	1.4423	4.0161	5.0735	2.3921	2.774	3.4208	4.1827	0.9516	0.783
ENSG00000228979	PPIAP55	0.1375	0.1375	0.1375	0.1375	0.1375	0.1375	0.1375	0.1375	0.1375	0.1375	0.1375	0.1375	0.1375	0.1375
ENSG00000264850	MIR4310	0.3413	0.1375	0.7649	0.1375	0.1375	0.1375	0.4539	0.1375	0.1375	0.1375	0.1375	0.1375	0.1375	0.1375
ENSG00000223012	RN7SKP264	0.1375	0.5642	0.1375	0.312	0.1375	0.1375	0.1375	0.1375	0.1375	0.1375	0.4274	0.6396	0.1375	0.1375
ENSG00000127831	VIL1	0.1947	0.1804	0.1951	0.2354	0.3093	0.2281	0.2757	0.2316	0.1375	0.1375	0.1474	0.1375	0.3591	0.1375
ENSG00000229878	AL365203.1	0.1375	0.1375	0.1375	0.1375	0.1375	0.1375	0.1375	0.1375	0.1375	0.1375	0.1375	0.1375	0.1375	0.1375
ENSG00000241357	AC092849.2	3.1037	3.3343	2.4608	2.9594	1.599	0.1375	2.4123	2.9354	2.4883	0.1375	2.5355	2.9526	2.8596	0.1375
ENSG00000225828	FAM229A	1.3983	2.0708	0.8205	1.3702	2.1068	2.2637	2.3654	2.8474	1.4598	0.7924	2.1518	2.778	1.691	0.1375
ENSG00000239556	AC004951.2	0.1375	0.5774	0.2572	0.337	0.1375	0.7997	0.5968	0.4329	0.4937	0.1375	0.4846	0.1375	0.1375	0.1375
ENSG00000223395	RBM22P7	0.1375	0.1375	0.1375	0.1375	0.1375	0.1375	0.1375	0.1375	0.1375	0.1375	0.1375	0.1375	0.1375	0.1375
ENSG00000233052	AL513304.1	0.1375	0.1375	0.1375	0.1375	0.1375	0.1375	0.1375	0.1375	0.1375	0.1375	0.1375	0.1375	0.1375	0.1375
ENSG00000231539	AC010132.1	0.1375	0.1375	0.1375	0.1375	0.1375	0.1375	0.1375	0.1375	0.1375	0.1375	0.1375	0.1375	0.1375	0.1375
ENSG00000086102	NFX1	3.4455	4.0726	2.7514	2.897	2.6102	2.8568	4.1838	4.4674	5.2204	4.3356	3.7588	4.452	3.6833	3.3818
ENSG00000233228	LPCAT2BP	0.1375	0.1375	0.1375	0.1375	0.1375	0.1375	0.1375	0.1375	0.1375	0.1375	0.1375	0.1375	0.1375	0.1375
ENSG00000226320	LINC01811	0.1375	0.1375	0.1375	0.1375	0.1375	0.1375	0.1375	0.1375	0.1375	0.1375	0.1375	0.1375	0.1375	0.1375
ENSG00000172987	HPSE2	0.1375	0.1375	0.1375	0.1375	0.1375	0.1375	0.1375	0.1375	0.1375	0.1375	0.1375	0.1375	0.1375	0.1375
ENSG00000165805	C12orf50	0.2229	0.227	0.1375	0.1375	0.1375	0.1375	0.1375	0.1375	0.1375	0.1375	0.1375	0.1375	0.1375	0.1375
ENSG00000229704	EIF2S2P2	0.1375	0.1375	0.1375	0.1375	0.1375	0.1375	0.2425	0.1375	0.3098	0.1375	0.1375	0.3166	0.1375	0.1375
ENSG00000218261	AL591034.2	0.1375	0.1375	0.1375	0.1375	0.1375	0.1375	0.1375	0.1375	0.1375	1.8389	0.1375	0.1375	0.1375	0.1375
ENSG00000085552	IGSF9	0.2164	0.4346	0.1723	0.2101	0.1665	0.1603	0.4308	0.5755	0.7839	0.1375	0.4267	0.5299	0.1375	0.637
ENSG00000092203	TOX4	4.258	4.9676	4.1254	4.3302	4.316	4.4607	4.9092	5.4058	4.2836	4.605	4.6742	5.8269	4.527	4.6536
ENSG00000132376	INPP5K	4.5837	5.2954	4.8858	5.5745	4.5885	4.9049	4.5913	5.4102	5.9493	5.41	4.4216	5.237	4.1831	6.414
ENSG00000249894	AC024581.1	0.1375	0.4708	0.1375	0.1375	0.1375	0.1375	0.1375	0.1375	0.1375	0.1375	0.1375	0.1375	0.1375	0.1375
ENSG00000243274	RN7SL571P	0.1375	0.1375	0.1375	0.1375	0.1375	0.1375	0.1375	0.1375	0.1375	0.1375	0.1375	0.1375	0.1375	0.1375
ENSG00000196591	HDAC2	2.3986	2.7701	2.0965	2.2556	2.0208	2.0798	2.5574	2.7645	2.4682	4.495	2.4328	2.3042	3.3445	1.7684
ENSG00000080561	MID2	0.2161	0.1853	0.1782	0.1375	0.1689	0.1703	1.8875	0.8753	3.4619	2.1656	0.3356	0.253	1.6191	2.5146
ENSG00000200142	Y_RNA	0.1375	0.1375	0.1375	0.1375	0.1375	0.1375	0.1375	0.1375	0.1375	0.1375	0.3854	1.4974	0.1375	0.1375
ENSG00000263382	AC018371.1	0.1375	0.1375	0.1375	0.1375	0.1375	0.1375	0.1375	0.1375	0.1375	0.1375	0.1375	0.1375	0.1375	0.1375
ENSG00000186980	KRTAP23-1	0.1375	0.1375	0.1375	0.1375	0.1375	0.1375	0.1375	0.1375	0.1375	0.1375	0.1375	0.1375	0.1375	0.1375
ENSG00000248319	LINC02275	0.1375	0.1375	0.1375	0.1375	0.1375	0.1375	0.1375	0.1375	0.1375	0.1375	0.1375	0.1375	0.1375	0.1375
ENSG00000262118	MTCO1P28	0.1375	0.1375	0.1375	0.1375	0.1375	0.1375	0.1967	0.1375	0.1929	0.1375	0.1375	0.1375	0.1375	0.1375
ENSG00000250933	GAPDHP66	0.1375	0.1375	0.1375	0.1375	0.1375	0.1375	0.1375	0.2017	0.1375	0.1375	0.1375	0.1375	0.1375	0.1375
ENSG00000066468	FGFR2	0.1375	0.4897	0.1907	0.1375	0.1375	0.1998	1.1581	0.8889	3.5401	2.7734	0.1375	0.1375	0.1375	2.5304
ENSG00000259822	AC140878.1	0.1375	0.1375	0.1375	0.1375	0.1375	0.1375	0.1375	0.1375	0.1375	0.1375	0.1375	0.1375	0.1375	0.1375
ENSG00000260940	AL109741.3	0.2011	0.4637	0.1375	0.4587	0.7972	0.4853	0.1375	0.1375	0.1375	0.1375	0.3476	0.4044	0.1375	0.1375
ENSG00000161904	LEMD2	3.0368	3.7668	2.6842	3.092	4.0621	4.3279	4.5153	5.2203	3.6872	4.6148	4.5802	5.1527	4.3687	4.3476
ENSG00000226572	SNORD57	0.1394	0.1398	1.7388	0.139	1.236	0.1386	0.1381	0.1381	2.727	2.9867	0.1507	0.1383	0.1375	0.1375
ENSG00000242118	RN7SL201P	0.1375	0.1375	0.1375	0.1375	0.1375	0.1375	0.1375	0.1375	0.1375	0.1375	0.1375	0.1375	0.1375	0.1375
ENSG00000156011	PSD3	2.6394	3.4576	1.5572	2.1326	1.7107	2.0438	3.017	3.348	4.273	4.7109	4.3846	5.2584	4.2088	2.7475
ENSG00000228670	NANOGP2	0.1623	0.1375	0.1375	0.1375	0.1375	0.1375	0.1375	0.1375	0.1845	0.1375	0.1375	0.1375	0.1375	0.1375
ENSG00000125755	SYMPK	3.1665	3.9709	3.0045	3.1371	3.4229	3.5514	4.4414	5.7042	4.392	4.5753	4.9034	5.7163	4.1731	4.7846
ENSG00000251417	AC145285.2	0.2705	0.1375	0.1971	0.2338	0.1833	0.1375	0.3873	0.1375	0.3116	0.1375	0.2536	0.7482	0.843	0.1375
ENSG00000237529	AL137847.2	0.1375	0.1375	0.1375	0.1375	0.1375	0.1375	0.1375	0.1375	0.7422	0.1375	0.1375	0.1375	0.1375	0.1375
ENSG00000168918	INPP5D	4.1053	4.3655	4.4667	4.5254	5.6332	5.9399	5.374	6.362	4.5142	3.4637	5.5815	6.4714	4.7262	6.3175
ENSG00000276696	Y_RNA	0.1375	0.1375	0.1375	0.1375	0.1375	0.1375	0.1375	0.1375	0.1375	0.1375	0.1375	0.1375	0.1375	0.1375
ENSG00000231073	AL590133.1	0.1375	0.1375	0.1375	0.1375	0.1375	0.1375	0.1375	0.1375	0.6184	0.1375	0.2635	0.1375	0.1375	0.1375
ENSG00000266707	PSMD7P1	0.1375	0.1375	0.1375	0.1375	0.1375	0.1375	0.1375	0.1375	0.1375	0.1375	0.1375	0.1375	0.1375	0.1375
ENSG00000262358	AC116914.1	0.1375	0.1375	0.1375	0.1375	0.1375	0.1375	0.1375	0.1375	0.1375	0.1375	0.1508	0.1375	0.1375	0.1375
ENSG00000136270	TBRG4	3.0837	3.7551	2.6637	2.5655	3.0734	2.9521	3.7316	4.5415	3.2184	3.6114	2.8103	3.9829	3.8757	2.1081
ENSG00000152795	HNRNPDL	4.0771	4.3581	3.6149	3.5221	3.6583	3.5015	4.6974	4.8789	4.4766	4.4774	4.9846	5.1396	4.5784	4.2666
ENSG00000252784	Y_RNA	0.1375	0.1375	0.1375	0.1375	0.1375	0.1375	0.1375	0.1375	0.1375	0.1375	0.1375	0.1375	0.1375	0.1375
ENSG00000259626	MTND3P12	6.7197	6.3026	7.6096	8.1335	5.6806	4.8129	4.753	4.8473	5.3533	4.3849	5.0825	4.3327	6.5685	5.6996
ENSG00000143632	ACTA1	0.1375	0.1375	0.4034	0.1375	0.1375	0.1375	0.1375	0.1375	0.1375	0.1375	0.1375	0.1375	0.1375	0.1375
ENSG00000250277	AC021146.7	0.1375	0.1375	0.1375	0.1375	0.1375	0.1375	0.1375	0.1375	0.1375	0.1375	0.1375	0.1375	0.1375	0.1375
ENSG00000276729	Metazoa_SRP	0.1375	0.1375	0.1375	0.1375	0.1375	0.1375	0.1375	0.502	0.1375	0.1375	0.2296	0.1375	0.1375	0.1375
ENSG00000249392	AC096588.1	0.1375	0.1375	0.1375	0.1375	0.1375	0.1375	0.1375	0.1375	0.1375	0.1375	0.1375	0.1375	0.1375	0.1375
ENSG00000235480	AC013270.1	0.5384	0.4372	0.1375	0.2966	0.1375	0.1375	0.6774	0.7874	0.1375	0.1375	1.9767	1.9213	0.1375	0.1375
ENSG00000152413	HOMER1	1.9241	2.7399	2.6846	2.0443	1.1212	0.7866	2.3281	2.327	2.5921	1.8677	2.1401	2.672	2.8137	2.9215
ENSG00000270111	AL583859.2	0.1375	0.1375	0.1375	0.1375	0.1375	0.1375	0.1375	0.1375	0.1375	0.1375	0.1375	0.1375	0.1375	0.1375
ENSG00000204498	NFKBIL1	2.0915	2.7354	2.3295	1.8429	3.316	3.6797	3.8936	4.7591	3.4318	3.4295	2.6466	3.6366	3.2286	4.7677
ENSG00000267099	NTF6G	0.1375	0.1375	0.1375	0.1375	0.1375	0.1375	0.1375	0.1375	0.1375	0.1375	2.4351	0.9259	0.1375	0.1375
ENSG00000143256	PFDN2	3.0816	3.564	3.088	2.5544	3.3516	3.2721	4.3396	4.8863	3.5358	3.9609	4.5288	4.5137	4.5377	4.1757
ENSG00000236830	CBR3-AS1	0.4854	0.7533	0.3533	0.5301	0.2503	0.2034	2.1655	1.4147	2.8999	1.3524	1.0379	1.5749	0.4226	0.1375
ENSG00000227940	LINC01696	0.1375	0.1375	0.1375	0.1375	0.1375	0.1375	0.1375	0.1375	0.1375	0.1375	0.1375	0.1375	0.1375	0.1375
ENSG00000214293	APTR	1.4629	1.3386	1.0566	1.217	1.289	1.353	2.5539	1.8664	4.5962	3.9842	1.6124	1.7122	1.7129	0.1375
ENSG00000260386	LINC01225	0.1375	0.3205	0.2381	0.3004	0.1375	0.1375	0.656	0.1375	0.4139	0.1375	0.1375	0.211	0.4271	0.1375
ENSG00000239439	RFKP2	0.1375	0.1375	0.1375	0.1375	0.1375	0.1375	0.1375	0.1375	0.1375	0.1375	0.1375	0.1375	0.1375	0.1375
ENSG00000279021	AC092139.2	0.2908	0.1375	0.2544	0.1375	0.2295	0.2996	0.2089	0.3748	0.1375	0.1375	0.2252	0.4272	0.1375	0.1375
ENSG00000064787	BCAS1	0.3209	0.3831	0.1725	0.1716	0.2178	0.1663	3.134	2.3425	4.0991	3.1481	0.1807	0.2142	0.1375	3.7864
ENSG00000199308	RNU6-222P	0.3827	0.1375	0.1375	0.1375	0.1375	0.1375	0.1375	0.1375	0.1375	0.1375	0.3662	0.1375	0.1375	0.1375
ENSG00000253719	ATXN7L3B	1.5794	1.7606	0.7882	1.0734	1.1958	1.2103	3.3571	3.0304	4.5873	3.6612	2.3247	2.5317	2.4355	2.3256
ENSG00000239205	LINC02023	0.1375	0.1375	0.1375	0.1375	0.1375	0.1375	0.1375	0.1375	0.1375	0.1375	0.1375	0.1375	0.1375	0.1375
ENSG00000224217	BX119904.1	0.1375	0.1375	0.1375	0.1375	0.1375	0.1375	0.1375	0.1375	0.1375	0.1375	0.1375	0.1375	0.1375	0.1375
ENSG00000263529	RN7SL122P	0.1375	0.1375	0.1375	0.1375	0.1375	0.1375	0.1375	0.1375	0.1375	0.1375	0.1375	0.1375	0.1375	0.1375
ENSG00000102401	ARMCX3	4.0211	5.0396	4.6593	4.45	3.6683	4.1506	4.8943	5.1229	4.4859	4.0566	4.5259	5.132	4.3139	4.3309
ENSG00000213212	NCLP1	0.1375	0.1375	0.1375	0.1375	0.1375	0.1375	0.1375	0.1375	0.1375	0.1375	0.1375	0.1375	0.1375	0.1375
ENSG00000212228	SNORA48	0.1375	0.1375	0.1375	0.1375	0.1375	0.1375	0.1375	0.1375	0.1375	0.1375	0.1375	0.1375	0.1375	0.1375
ENSG00000270495	AC008825.2	0.1375	0.1375	0.1375	0.1375	0.1375	0.1375	0.1375	0.1375	0.1375	0.1375	0.1375	0.1375	0.1375	0.1375
ENSG00000253509	AC104393.1	0.1375	0.5681	0.1375	0.1375	0.1375	0.1375	0.1375	0.5577	0.1375	0.1375	0.1375	0.1375	0.1375	0.1375
ENSG00000265579	AC023301.1	0.1375	0.1375	0.1375	0.1375	0.1375	0.1375	0.1375	0.1375	0.1375	0.1375	0.1375	0.1375	0.1375	0.1375
ENSG00000204778	CBWD4P	0.1375	0.1375	0.2332	0.1375	0.1375	0.1375	0.1375	0.3182	0.1375	0.1375	0.1375	0.1375	0.1375	0.1375
ENSG00000125249	RAP2A	1.3232	1.4344	1.0618	0.8708	1.0244	0.7498	1.8897	1.7668	1.3623	1.2004	1.7687	1.6062	3.0081	2.195
ENSG00000284709	KF456110.1	0.1375	0.1375	0.1375	0.1375	0.2508	0.1375	0.1375	0.2936	0.3021	0.1375	0.1375	0.1375	0.1375	0.1375
ENSG00000254403	OR10Y1P	0.7027	0.7237	0.1375	0.1375	0.1375	0.1375	0.3468	0.1375	0.1375	0.1375	0.3108	0.562	0.1375	0.1375
ENSG00000224430	MKRN5P	0.1897	0.1375	0.4869	0.6681	0.4187	0.6684	1.1573	1.9019	0.3833	1.4684	1.0379	1.0917	1.0663	0.1375
ENSG00000249807	AC034229.1	0.1375	0.1375	0.1375	0.1375	0.1375	0.1375	0.1375	0.1375	0.1375	0.1375	0.1375	0.1375	0.1375	0.1375
ENSG00000267095	AC025048.1	0.1375	0.1375	0.1375	0.1375	0.1375	0.1375	0.3562	0.1375	0.3297	0.1375	0.1375	0.1375	0.1375	0.1375
ENSG00000122641	INHBA	5.6838	6.224	4.5275	4.8342	1.1502	1.5362	5.0251	5.9261	3.0032	5.7303	6.2167	5.8948	5.9006	2.2518
ENSG00000236939	BAALC-AS2	0.3854	0.1375	0.1375	0.1375	0.1375	0.1375	0.1375	0.1375	1.0541	0.1375	0.5868	0.6411	0.1375	0.1375
ENSG00000145063	AC062028.1	0.1375	0.1375	0.1375	0.1375	0.1375	0.1375	0.1375	0.1375	0.1375	0.1375	0.1375	0.1375	0.1375	0.1375
ENSG00000197251	LINC00336	0.1375	0.1375	0.1375	0.1375	0.1375	0.1375	0.1773	0.1375	0.1375	0.1375	0.1375	0.1375	0.1375	0.1375
ENSG00000201843	Y_RNA	0.1375	0.1375	0.1375	0.1375	0.1375	0.1375	0.1375	0.1375	0.1375	0.1375	0.1375	0.1375	0.1375	0.1375
ENSG00000248926	AC114801.2	0.1375	0.1375	0.1375	0.1375	0.1375	0.1375	0.1375	0.1375	0.1375	0.1375	0.1375	0.1375	0.1375	0.1375
ENSG00000224387	AL139246.1	0.1375	0.1375	0.1375	0.1375	0.1375	0.3173	0.4886	0.8776	0.1375	0.1375	0.2611	0.1375	0.1375	0.1375
ENSG00000276105	KCNQ1OT1_2	1.6155	2.6709	2.4617	2.3621	2.3918	1.6412	2.4056	3.4042	2.1991	2.3034	3.3487	4.2629	2.4839	3.433
ENSG00000251388	AC079380.1	0.1375	0.1375	0.1375	0.1375	0.1375	0.1375	0.1375	0.1375	0.1375	0.1375	0.1375	0.1375	0.1375	0.1375
ENSG00000122417	ODF2L	1.8524	2.743	2.3433	2.2534	2.8224	2.4325	4.0618	4.0976	5.321	4.5353	4.2806	4.9131	2.3171	2.517
ENSG00000260555	AC092681.2	0.1375	0.1375	0.1375	0.1375	0.1375	0.1375	0.1375	0.1375	0.1375	0.1375	0.1375	0.1375	0.1375	0.1375
ENSG00000207380	Y_RNA	0.5194	0.6955	0.1375	0.1375	0.1375	0.1375	0.4124	0.1375	0.1375	0.1375	0.2394	0.5404	0.1375	0.1375
ENSG00000257476	LINC02459	0.1375	0.1375	0.1375	0.1375	0.1375	0.1375	0.1375	0.1375	0.1375	0.1375	0.1375	0.1375	0.1375	0.1375
ENSG00000254581	AC068587.3	0.1375	0.1375	0.1375	0.1375	0.1375	0.1375	0.1375	0.1375	0.1375	0.1375	0.1375	0.1375	0.1375	0.1375
ENSG00000283551	SNORD98	0.8303	0.1375	0.1375	0.1375	0.617	0.6244	0.8964	0.886	0.1375	0.1375	1.338	0.3421	0.1375	0.1375
ENSG00000283994	AC092652.3	3.1762	3.0826	2.9306	3.1125	3.1283	3.487	1.3987	1.6045	2.6105	1.1819	1.1006	1.2085	2.1533	1.8507
ENSG00000206107	KRTAP27-1	0.1375	0.1375	0.1375	0.1375	0.1375	0.1375	0.1375	0.1375	0.1375	0.1375	0.1375	0.1375	0.1375	0.1375
ENSG00000258999	AL136040.1	0.27	0.5556	0.1634	0.3644	0.1375	0.1375	0.4845	0.2586	0.1375	0.1375	0.1375	0.1375	0.9922	0.1375
ENSG00000231723	AC018880.2	0.1375	0.1375	0.1375	0.1375	0.1375	0.1375	0.1375	0.1375	0.1375	0.1375	0.1375	0.1375	0.1375	0.1375
ENSG00000172288	CDY1	0.1375	0.1375	0.1375	0.1375	0.1375	0.1375	0.1375	0.1375	0.1375	0.1375	0.1375	0.1375	0.1375	0.1375
ENSG00000257604	AC027288.2	0.1375	0.1375	0.1375	0.1375	0.1375	0.1375	0.1375	0.1375	0.1375	0.1375	0.1375	0.1375	0.1375	0.1375
ENSG00000255138	GLTPP1	0.1375	0.3515	0.1375	0.1375	0.1375	0.1375	0.1375	0.1375	0.1375	0.1375	0.1375	0.1375	0.1375	0.1375
ENSG00000135902	CHRND	0.1375	0.1375	0.1375	0.1375	0.1375	0.1375	0.1375	0.1375	0.1375	0.1375	0.1375	0.1375	0.1375	0.1375
ENSG00000266774	AC116003.2	0.1375	0.1375	0.1375	0.1375	0.1375	0.1375	0.1375	0.1375	0.1375	0.1375	0.1375	0.1375	0.1375	0.1375
ENSG00000223702	ZDHHC20P2	0.1375	0.1375	0.1375	0.1375	0.1375	0.1375	0.1375	0.1375	0.1375	0.1375	0.1375	0.1375	0.1375	0.1375
ENSG00000218577	AL035696.2	0.1375	0.1375	0.1375	0.1375	0.1375	0.1375	0.1375	0.1375	0.1375	0.1375	0.1375	0.1375	0.1375	0.1375
ENSG00000183060	LYSMD4	0.5381	0.7622	0.6862	0.9118	0.4456	0.4091	2.0562	2.3446	1.1595	1.1888	1.3918	1.5121	1.6795	1.2457
ENSG00000263435	AC024610.1	0.1375	0.1375	0.1375	0.1375	0.1375	0.1375	0.1375	0.1375	0.1375	0.1375	0.1375	0.1375	0.1375	0.1375
ENSG00000278818	Metazoa_SRP	3.2145	4.3622	4.1963	4.2256	4.5234	4.7177	4.535	5.3986	3.8093	5.118	5.424	6.1635	2.9342	3.3774
ENSG00000116183	PAPPA2	0.1615	0.1812	0.1709	0.1648	0.1602	0.1669	0.1375	0.1633	0.2878	0.1375	0.1442	0.1375	0.1375	0.5726
ENSG00000145743	FBXL17	0.9427	1.3333	1.2661	0.9856	1.4396	1.0547	1.3478	2.4085	2.9523	1.8833	1.3485	1.5957	2.4156	2.7926
ENSG00000201925	RNA5S15	0.1375	0.1375	0.1375	0.1375	0.1375	0.1375	0.1375	0.1375	0.1375	0.1375	0.1375	0.1375	0.1375	0.1375
ENSG00000248008	NRAV	0.4003	0.2806	0.2404	0.4835	0.6019	0.413	3.4557	2.8441	6.3322	5.6577	0.5067	0.4476	0.1375	2.6027
ENSG00000151466	SCLT1	4.4167	4.5133	4.4318	4.7295	3.9125	3.9375	4.436	3.8994	4.6329	4.2637	4.3975	4.7302	3.6683	4.5636
ENSG00000276605	AC027250.1	0.2183	0.2819	0.2579	0.1375	0.2293	0.2351	0.1375	1.2085	0.1375	0.1375	0.1375	0.1375	0.1375	0.1375
ENSG00000234655	OR7E155P	0.1375	0.1375	0.1375	0.1375	0.1375	0.1375	0.1375	0.1375	0.1375	0.1375	0.2014	0.1375	0.1375	0.1375
ENSG00000202078	Y_RNA	1.8751	1.5338	2.5501	2.7647	2.6477	3.1613	1.877	2.5398	2.3306	2.3321	2.7975	2.4346	1.908	0.1375
ENSG00000115946	PNO1	1.389	1.7828	0.7419	1.0413	0.6961	0.5892	2.1918	2.3779	3.2141	2.8193	1.3939	1.5772	1.395	1.8527
ENSG00000260019	LINC01992	0.1375	0.1375	0.1375	0.1375	0.1375	0.1375	0.1375	0.1375	0.1375	0.1375	0.1375	0.1375	0.1375	1.3381
ENSG00000201088	Y_RNA	0.1375	0.1375	0.1375	0.1375	0.1375	0.1375	0.1375	0.1375	0.1375	0.1375	0.1375	0.1375	0.1375	0.1375
ENSG00000134900	TPP2	2.9941	3.5283	2.5706	2.8844	2.4008	2.3949	3.7452	3.7596	4.7781	5.2547	4.4524	4.7326	4.6213	2.3833
ENSG00000186103	ARGFX	0.1375	0.1375	0.1375	0.1375	0.1375	0.1375	0.1375	0.1375	0.1375	0.1375	0.1375	0.1375	0.1375	0.1375
ENSG00000131187	F12	1.4791	2.7925	1.9519	1.7348	0.7612	1.2417	2.1867	2.5733	2.4378	0.5023	1.0379	1.6444	1.1102	2.3521
ENSG00000145863	GABRA6	0.1375	0.1375	0.1375	0.1375	0.1375	0.1375	0.1375	0.1375	0.1375	0.1375	0.1375	0.1375	0.1375	0.1375
ENSG00000223446	AL451065.1	2.9542	3.7695	2.7104	1.427	0.1375	0.1375	1.4966	2.6068	1.9727	0.1375	2.1389	2.9864	0.1375	0.1375
ENSG00000236283	AC019197.1	0.1375	0.1375	0.1375	0.1375	0.1375	0.1375	0.1375	0.1375	0.2086	0.1375	0.1375	0.1375	0.7015	0.1375
ENSG00000057608	GDI2	4.7637	4.5916	4.7824	5.0508	5.23	4.8178	5.2645	4.5798	5.6899	5.8803	5.8401	5.7363	6.1165	6.0809
ENSG00000254201	AC068880.3	0.1375	0.1375	0.1375	0.1375	0.1375	0.1375	0.1375	0.1375	0.1375	0.1375	0.3946	0.1375	0.1375	0.1375
ENSG00000279640	AC138466.5	0.1375	0.1375	0.1375	0.1375	0.1375	0.1375	0.1375	0.1375	0.1375	0.1375	0.1375	0.1375	0.1375	0.1375
ENSG00000222966	SNORA40	0.1375	0.1375	0.1375	0.1375	0.1375	0.1375	0.1375	0.1375	0.1375	0.1375	0.1375	0.1375	0.1375	0.1375
ENSG00000134996	OSTF1	5.3098	5.4279	4.9966	5.4257	6.6413	6.6332	5.6958	5.8337	6.0592	5.7011	5.5062	5.6686	5.3949	5.7917
ENSG00000159885	ZNF222	2.5423	2.4504	1.9997	1.6848	2.6984	2.1176	2.2735	2.8679	2.7996	1.9223	1.0612	1.4169	3.0356	1.7924
ENSG00000255863	AC073610.2	0.1375	0.1375	0.1375	0.1375	0.1375	0.1375	0.1375	0.1375	0.1375	0.1375	0.1375	0.1375	0.1375	0.1375
ENSG00000270937	AL033381.2	0.1375	0.1375	0.1375	0.1375	0.1375	0.1375	0.1375	0.1375	0.1375	0.1375	0.1375	0.1375	0.1375	0.1375
ENSG00000184709	LRRC26	0.8635	0.2523	0.3777	0.1375	0.175	0.1375	1.4444	0.73	0.5292	0.1375	0.1375	0.2735	0.1375	4.0753
ENSG00000262529	AC130650.1	0.1375	0.1375	0.1375	0.1375	0.1375	0.1375	0.1375	0.1375	0.1375	0.1375	0.1375	0.1375	0.1375	0.1375
ENSG00000250103	PANCR	0.1375	0.1375	0.1375	0.1375	0.1375	0.1375	0.1375	0.1375	0.1375	0.1375	0.1375	0.1375	0.1375	0.1375
ENSG00000279298	Z99916.3	0.1375	0.1375	0.1375	0.1375	0.1375	0.1375	0.1375	0.1375	0.1375	0.1375	0.1375	0.1375	0.1375	0.1375
ENSG00000160801	PTH1R	0.1375	0.1375	0.1375	0.1375	0.1375	0.1375	0.1375	0.1375	0.1375	0.1375	0.1375	0.1375	0.1375	0.1375
ENSG00000276479	MIR548AZ	0.1375	0.1375	0.1375	0.1375	0.1375	0.1375	0.1375	0.1375	0.1375	0.1375	0.1375	0.1375	0.1375	0.1375
ENSG00000251985	RNU6-1161P	0.1375	0.1375	0.1375	0.1375	0.1375	0.1375	0.1375	0.1375	0.1375	0.1375	0.1375	0.1375	0.1375	0.1375
ENSG00000262251	AC087388.1	0.9865	0.9112	0.9545	0.552	0.6195	0.6037	1.951	2.2507	1.7687	0.5747	1.2917	2.2934	0.9942	1.4963
ENSG00000276754	AC006111.3	0.1375	0.1375	0.1375	0.1375	0.1375	0.5704	0.1375	0.4358	0.3576	0.1375	0.4799	0.1375	0.1375	2.6003
ENSG00000143603	KCNN3	0.1878	0.3214	0.1375	0.1801	0.1375	0.1375	0.6444	0.4706	0.9269	0.3818	0.1528	0.1506	0.1375	0.1375
ENSG00000203387	AC074019.1	0.1375	0.1375	0.1375	0.1375	0.1375	0.1375	0.1375	0.1375	0.1375	0.1375	0.1375	0.1375	0.1375	0.1375
ENSG00000240720	LRRD1	0.1916	0.1781	1.399	0.1375	0.1441	0.1602	0.1634	0.1375	0.1885	2.7626	0.3538	0.1375	0.3772	1.5389
ENSG00000225493	LINC01107	0.1375	0.1375	0.1375	0.1375	0.1375	0.1375	0.1375	0.1375	0.1375	0.1375	0.1375	0.1375	0.1375	0.1375
ENSG00000270450	IGKV2OR2-7	0.1375	0.1375	0.1375	0.1375	0.1375	0.1375	0.1375	0.1375	0.1375	0.1375	0.1375	0.1375	0.1375	0.1375
ENSG00000226407	RPL23P11	0.1375	0.1375	0.1375	0.1375	0.1375	0.1375	0.1375	0.1375	0.1375	0.1375	0.1375	0.1375	0.1375	0.1375
ENSG00000168743	NPNT	0.1375	0.1375	0.1375	0.1375	0.1375	0.1375	0.2706	0.1375	0.1375	0.1375	0.1375	0.1375	0.1375	0.1375
ENSG00000261176	AC009117.2	0.1375	0.1375	0.1375	0.1375	0.1375	0.1375	0.1375	0.1375	0.1375	0.1375	0.1375	0.1375	0.1375	0.1375
ENSG00000236951	AC007359.1	0.1375	0.1375	0.1375	0.1375	0.1375	0.1375	0.1375	0.1375	0.1375	0.1375	0.1375	0.1375	0.1375	0.1375
ENSG00000104825	NFKBIB	4.7076	5.4415	3.971	4.3328	3.8161	3.5966	4.6087	5.9762	3.5952	3.1499	4.6652	5.1069	4.1831	5.7654
ENSG00000231302	RPL36P2	1.6538	1.9113	0.2617	0.692	0.1375	0.1375	0.1375	1.2712	0.1375	0.1375	1.2183	1.7187	0.1375	0.1375
ENSG00000267293	AC012569.1	1.6473	2.2279	1.2606	0.9305	0.6856	0.716	1.3484	2.0671	0.7899	0.1375	1.2126	1.4983	0.8821	1.2362
ENSG00000265706	SNORD53B	0.1375	0.1375	0.1375	1.7549	0.4686	0.8845	1.3242	0.1375	0.8689	0.1375	0.4655	0.3419	0.1375	0.1375
ENSG00000232474	NCKAP5-IT1	0.1375	0.1375	0.1375	0.1375	0.1375	0.1375	0.1375	0.1375	0.1375	0.1375	0.1375	0.1375	0.1375	0.1375
ENSG00000223197	RNU6-1001P	0.1375	0.1375	0.1375	0.1375	0.1375	0.1375	0.1375	0.1375	0.1375	0.1375	0.1375	0.1375	0.1375	0.1375
ENSG00000104881	PPP1R13L	0.4189	1.1332	0.4722	0.3839	0.7488	0.6923	3.0565	2.829	2.6143	1.7691	1.0775	0.8316	0.9117	5.235
ENSG00000196636	SDHAF3	1.9207	1.1388	1.4277	1.8073	2.2721	2.2816	2.1593	1.0296	2.0669	2.1052	0.664	1.2294	1.117	0.1375
ENSG00000146722	AC211486.1	0.1375	0.1375	0.1375	0.1375	0.1375	0.1375	0.2534	0.1375	1.7389	0.1375	0.1375	0.1375	0.1375	0.1375
ENSG00000262096	PCDHB19P	0.1375	0.1375	0.1375	0.1375	0.1375	0.1375	0.1375	0.1375	0.1375	0.1375	0.1375	0.1375	0.1375	0.1375
ENSG00000273155	AC092587.1	0.1682	0.1375	0.1375	0.1375	0.1375	0.1375	0.1375	0.1375	0.1375	0.1375	0.1375	0.257	0.1375	0.1375
ENSG00000138028	CGREF1	0.2179	0.1375	0.1375	0.1375	0.1375	0.1375	0.5025	0.2633	0.1375	0.1375	0.1375	0.1375	0.1375	3.4596
ENSG00000224880	MTCYBP29	0.1375	0.1375	0.1375	0.1375	0.1375	0.1375	0.1375	0.1375	0.1375	0.1375	0.1375	0.1375	0.1375	0.1375
ENSG00000230955	AL929472.2	1.1658	1.1057	0.4258	0.5967	0.1375	0.1375	0.5609	0.1375	0.4698	0.1375	0.1375	0.1375	1.4174	0.1375
ENSG00000252519	RNU6-783P	0.1375	0.1375	0.1375	0.1375	0.1375	0.1375	0.1375	0.1375	0.1375	0.1375	0.1375	0.1375	0.1375	0.1375
ENSG00000161999	JMJD8	1.4426	2.2906	1.9505	1.3718	1.6215	1.3726	3.1742	3.825	3.9146	3.7142	2.04	2.9636	3.7534	4.0837
ENSG00000228400	AC079154.1	0.1375	0.1375	0.1375	0.1375	0.1375	0.1375	0.1375	0.1375	0.1375	0.1375	0.1375	0.1375	0.1375	0.1375
ENSG00000215029	TCP11X2	0.1375	0.1375	0.1375	0.1375	0.1375	0.1375	0.4173	0.4577	0.7386	0.1375	0.1375	0.1375	0.1375	0.1375
ENSG00000230749	MEIS1-AS2	0.1375	0.1375	0.1375	0.1375	0.1375	0.1375	0.1375	0.1375	0.1375	0.1375	0.1375	0.1375	0.1375	0.1375
ENSG00000112877	CEP72	0.6575	1.063	0.4115	0.3288	0.3112	0.587	2.0095	2.5321	2.0386	0.1375	0.9217	1.5712	1.4816	0.1375
ENSG00000155275	TRMT44	2.5627	3.4419	1.2238	1.6086	0.5197	1.2065	2.8857	3.0776	3.8197	2.329	2.1469	3.0144	2.6691	1.6498
ENSG00000271208	Z99289.3	0.1375	0.1375	0.1375	0.1375	0.1375	0.1375	0.1375	0.1375	0.1375	0.1375	0.1375	0.1375	0.1375	0.1375
ENSG00000237700	PRAMEF33	0.1375	0.1375	0.1375	0.1375	0.1375	0.1375	0.1375	0.1375	0.1375	0.1375	0.1375	0.1375	0.1375	0.1375
ENSG00000239710	RN7SL692P	0.1375	0.1375	0.1375	0.1375	0.1375	0.1375	0.1375	0.1375	0.1375	0.1375	0.1375	0.1375	0.1375	0.1375
ENSG00000213153	AP001979.1	0.1375	0.1375	0.1375	0.1375	0.1375	0.1375	0.1375	0.1375	0.1375	0.1375	0.1375	0.1375	0.1375	0.1375
ENSG00000248498	ASNSP1	0.1375	0.1375	0.1375	0.1375	0.1375	0.1375	0.1375	0.1375	0.1375	0.1375	0.1375	0.1375	0.1375	0.1375
ENSG00000223729	LINC02247	0.1375	0.1375	0.1375	0.1375	0.1375	0.1375	0.1375	0.1375	0.1375	0.1375	0.1375	0.1375	0.1375	0.1375
ENSG00000263218	AC127496.6	0.1375	0.1375	0.1375	0.1375	0.1375	0.3383	0.1375	0.1375	0.1375	0.1375	0.1375	0.1375	0.1375	0.1375
ENSG00000232337	AC009313.2	0.1883	0.5366	0.197	0.2372	0.1375	0.1375	0.1375	0.1375	0.2273	0.1375	0.1375	0.1764	0.1375	0.1375
ENSG00000130402	ACTN4	4.6963	5.3134	4.8116	4.8467	5.7421	5.5889	6.642	6.7264	6.0514	6.277	6.0222	6.4556	5.7723	7.089
ENSG00000261652	C15orf65	0.2414	0.512	0.1375	0.1375	0.1375	0.1375	1.643	0.1375	3.9856	2.4054	0.1375	0.1375	0.1375	0.1375
ENSG00000162664	ZNF326	2.073	2.1818	1.1923	1.8471	1.3901	1.158	2.3585	2.9374	2.6932	2.7227	3.1367	3.2562	2.5109	0.1375
ENSG00000236811	GAPDHP2	0.1375	0.1375	0.1375	0.1375	0.1375	0.1375	0.1375	0.1375	0.1375	0.1375	0.1375	0.1375	0.1375	0.1375
ENSG00000243902	ELFN2	0.1375	0.1375	0.1375	0.1375	0.1375	0.2325	0.1375	0.1375	0.1375	0.1375	0.1375	0.1375	0.1375	0.1375
ENSG00000240024	LINC00888	0.5246	0.8509	0.177	0.2747	0.5649	0.1696	0.9468	1.4548	3.0778	2.1627	0.653	1.8359	0.9982	0.1375
ENSG00000163755	HPS3	1.4943	2.0039	1.5428	1.2996	2.2137	1.6804	2.5881	2.605	3.0575	3.2441	2.2176	2.684	3.8586	1.5159
ENSG00000254630	AP001922.2	0.1375	0.1375	0.1375	0.1375	0.1375	0.1375	0.1375	0.1375	0.3056	0.1375	0.1375	0.1375	0.1375	0.1375
ENSG00000237548	TTLL11-IT1	0.1375	0.1375	0.1375	0.1375	0.1375	0.1375	0.2232	0.1375	0.2404	0.1375	0.1375	0.1375	0.1375	0.1375
ENSG00000171116	HSFX1	0.1375	0.1375	0.1375	0.1375	0.1375	0.1375	0.1375	0.1375	0.1375	0.1375	0.1375	0.1375	0.1375	0.1375
ENSG00000170290	SLN	0.1375	0.1375	0.1375	0.1375	0.1375	0.1375	0.1375	0.1375	0.1375	0.1375	0.1375	0.1375	0.1375	0.1375
ENSG00000237125	HAND2-AS1	0.1375	0.1375	0.1375	0.1375	0.1375	0.1375	0.1375	0.1375	0.1375	0.1375	0.1375	0.1375	0.1375	0.1375
ENSG00000070886	EPHA8	0.1375	0.2155	0.1375	0.1375	0.1375	0.1375	0.1375	0.1375	0.1375	0.1375	0.1375	0.1722	0.1375	0.1375
ENSG00000180592	SKIDA1	0.1493	0.1375	0.1375	0.1537	0.1375	0.1375	1.0691	0.6146	1.3034	0.6487	0.3075	0.3684	0.1375	0.1375
ENSG00000233251	AC007743.1	0.1375	0.1375	0.1375	0.1539	0.1375	0.1375	0.1672	0.1375	0.1375	0.1375	0.1375	0.1375	0.1375	0.1375
ENSG00000213338	ATF4P1	0.1375	0.1375	0.1914	0.1597	0.1375	0.1375	0.1375	0.1375	0.1375	0.1375	0.1375	0.1375	0.1375	0.1375
ENSG00000176953	NFATC2IP	3.4131	4.1143	3.1906	3.051	2.5879	2.9407	4.2859	4.7977	3.2253	3.3633	4.6087	5.244	4.3394	4.0863
ENSG00000242537	MRE11P1	0.1375	0.1375	0.1375	0.1375	0.1375	0.1375	0.1375	0.1375	0.1375	0.1375	0.1375	0.1375	0.1375	0.1375
ENSG00000227615	AP001324.1	1.4313	1.3387	0.5538	0.527	0.5084	0.2538	1.5766	0.1375	0.1375	0.7224	0.2858	0.4775	0.1375	2.7945
ENSG00000274196	FAM197Y4	0.1375	0.1375	0.1375	0.1375	0.1375	0.1375	0.1375	0.1375	0.1375	0.1375	0.1375	0.1375	0.1375	0.1375
ENSG00000244405	ETV5	2.3702	2.6976	2.464	3.0385	1.3739	2.0366	1.322	2.7912	1.5996	2.4662	1.7817	1.5034	3.095	2.3177
ENSG00000215899	AC209007.1	0.1952	0.1375	0.1375	0.1375	0.1375	0.1375	0.1375	0.1375	0.1375	0.1375	0.1864	0.1375	0.1375	0.1375
ENSG00000227401	RPL37P1	0.1375	0.1375	0.1375	0.1375	0.1375	0.1375	0.5715	0.1375	1.7312	0.1375	0.1375	0.1375	0.1375	0.1375
ENSG00000212420	RNU6-1111P	0.1375	0.1375	0.1375	0.6804	1.2692	0.8859	0.3197	0.1375	0.6738	1.7049	0.4484	0.1375	0.1375	0.1375
ENSG00000126215	XRCC3	0.9148	0.8742	0.2494	0.2918	0.3392	0.346	1.5498	1.8653	2.3357	1.9626	1.3311	2.0936	0.8045	1.1264
ENSG00000225832	AL035090.1	0.1375	0.1375	0.1375	0.1375	0.1375	0.1375	0.1375	0.1375	0.1375	0.1375	0.1375	0.1375	0.1375	0.1375
ENSG00000279729	AC092326.2	0.1375	0.1375	0.1375	0.1375	0.1375	0.1375	0.1375	0.1375	0.1375	0.1375	0.1375	0.1375	0.1375	0.1375
ENSG00000283751	MIR452	0.1375	0.1375	0.1375	0.1375	0.1375	0.1375	0.1375	0.1375	0.1375	0.1375	0.1375	0.1375	0.1375	0.1375
ENSG00000160888	IER2	8.2504	8.1679	8.2772	7.9369	6.3434	6.9824	8.2541	8.8972	7.3705	5.7067	8.3579	8.8232	9.618	11.3362
ENSG00000196141	SPATS2L	1.8624	2.2098	1.8769	2.0702	1.6088	1.9616	6.5605	5.7165	6.6246	6.1407	6.0007	6.1578	4.0924	3.4653
ENSG00000261757	AC005592.1	0.1375	0.1375	0.1375	0.1375	0.1375	0.1375	0.1375	0.1375	0.1375	0.1375	0.1375	0.1375	0.1375	0.1375
ENSG00000225811	AL354771.1	0.1375	0.1375	0.1375	0.1375	0.1375	0.1375	0.1375	0.1375	0.1375	0.1375	0.1375	0.1375	0.1375	0.1375
ENSG00000188010	MORN2	0.8517	0.7494	0.5733	0.396	0.5518	0.4855	4.1108	2.5232	6.946	6.3624	1.1596	0.8694	1.9077	0.1375
ENSG00000237419	AL954642.1	0.1375	0.1375	0.1375	0.1375	0.1375	0.1375	0.8596	0.4835	0.7666	0.1375	0.1375	0.1375	0.1375	0.1375
ENSG00000229649	AL133387.2	0.1375	0.1375	0.1375	0.1375	0.1375	0.1375	0.1375	0.1375	0.1375	0.1375	0.1375	0.1375	0.1375	0.1375
ENSG00000253771	TPTE2P1	0.1375	0.1375	0.1375	0.1375	0.1375	0.1375	0.3211	0.1375	0.3512	1.1585	0.1375	0.1375	0.1375	0.1375
ENSG00000231110	FO393408.1	0.1375	0.1375	0.1375	0.1375	0.1375	0.1375	0.1375	0.1375	0.1375	0.1375	0.1375	0.1375	0.1375	0.1375
ENSG00000226499	AL136380.1	0.1375	0.1375	0.1375	0.1375	0.1375	0.1375	0.1375	0.1375	0.1375	0.1375	0.1375	0.1375	0.1375	0.1375
ENSG00000259126	AL161752.1	0.1375	0.1375	0.1375	0.1375	0.1375	0.1375	0.1375	0.1375	0.1375	0.1375	0.1375	0.1375	0.1375	0.1375
ENSG00000186940	CHCHD2P9	0.2588	0.1375	0.1375	0.1375	0.4338	0.2921	0.5212	0.6652	0.1375	0.1375	0.2075	0.1375	0.1375	0.1375
ENSG00000115993	TRAK2	1.7831	2.081	1.4127	1.6748	1.829	1.4173	2.6847	2.9789	2.4427	2.1288	2.6219	2.8569	3.1585	2.1719
ENSG00000088930	XRN2	5.0606	5.0551	4.0127	4.192	5.6304	5.6777	3.998	3.9716	5.2742	4.9605	4.1762	4.5417	4.7105	4.484
ENSG00000271676	AC104771.1	0.1375	0.1375	0.1375	0.1375	0.1375	0.1375	0.1375	0.1375	0.1375	0.1375	0.1375	0.1375	0.1375	0.1375
ENSG00000226296	AC036101.1	0.1375	0.1375	0.1375	0.1375	0.1375	0.1375	0.1375	0.1375	0.1375	0.1375	0.1375	0.1375	0.1375	0.1375
ENSG00000231310	TBL1XR1-AS1	0.1375	0.1375	0.1375	0.1375	0.1375	0.1375	0.1375	0.1375	0.1375	0.1375	0.1375	0.1375	0.1375	0.1375
ENSG00000166049	PASD1	0.1375	0.1375	0.1375	0.1375	0.1375	0.1375	0.1375	0.1375	0.1375	0.1375	0.1375	0.1375	0.1375	0.1375
ENSG00000072657	TRHDE	0.1448	0.1509	0.1486	0.1375	0.1375	0.1375	0.1375	0.1434	0.2028	0.6726	0.1683	0.231	0.2042	0.1375
ENSG00000271614	ATP2B1-AS1	6.6398	7.5403	5.5063	5.9908	2.7183	3.3274	4.459	5.2604	3.8617	3.5188	4.2546	4.7505	4.6602	5.2391
ENSG00000228648	AL353747.2	0.1375	0.1375	0.1375	0.1375	0.1375	0.1375	1.5818	0.1375	2.8104	2.5242	0.1375	0.1375	0.1375	0.1375
ENSG00000205302	SNX2	3.8572	4.0419	3.5188	3.5741	4.2795	3.8818	4.725	5.0586	5.3976	5.7449	5.9929	5.6933	5.5145	4.6417
ENSG00000259288	BUB1B-PAK6	0.1375	0.1375	0.1375	0.1375	0.1375	0.1375	0.1375	0.1375	0.1375	0.8134	0.1375	0.1375	0.1375	0.1375
ENSG00000279263	OR2L8	0.1375	0.1375	0.1375	0.1375	0.1375	0.1375	0.1375	0.1375	0.1375	0.1375	0.2069	0.1375	0.6927	0.1375
ENSG00000272164	AC005972.3	0.1375	0.1375	0.1375	0.1375	0.1375	0.1375	0.1375	0.1375	0.1375	0.1375	0.1375	0.1375	0.1375	0.1375
ENSG00000228293	AL049712.1	0.8286	0.747	0.1375	0.4212	0.1375	0.1375	0.1375	0.3249	0.4772	0.1375	0.2176	0.1375	0.1375	0.1375
ENSG00000256968	SNRPEP2	0.1375	0.1375	0.1375	0.454	0.1375	0.3011	0.1375	0.1375	0.1375	0.1375	0.3244	0.9922	0.1375	0.1375
ENSG00000206927	Y_RNA	0.1375	0.1375	0.1375	0.1375	0.1375	0.1375	0.1375	0.1375	0.1375	0.1375	0.1375	0.1375	0.1375	0.1375
ENSG00000217004	Z97832.1	0.1375	0.1375	0.1375	0.1375	0.1375	0.1375	0.1375	0.1375	0.1375	0.1375	0.1375	0.1375	0.1375	0.1375
ENSG00000240759	RPS27P21	0.1375	0.1375	0.1375	0.1375	0.1375	0.1375	0.1375	0.1375	0.1375	0.1375	0.1375	0.1375	0.1375	0.1375
ENSG00000049883	PTCD2	0.244	0.1755	0.2104	0.1938	0.1375	0.1713	0.3911	0.3562	0.6224	0.8938	0.2413	0.235	0.2323	0.1375
ENSG00000223920	AC099791.1	0.1375	0.1375	0.1375	0.1375	0.1375	0.1375	0.1375	0.1375	0.2126	0.1375	0.1375	0.1375	0.1375	0.1375
ENSG00000267101	AC090376.1	0.1375	0.1375	0.1375	0.1375	0.1375	0.1375	0.1375	0.1375	0.1375	0.1375	0.1375	0.1375	0.1375	0.1375
ENSG00000136144	RCBTB1	3.2545	3.4364	2.788	2.8948	2.8119	3.1971	2.8576	2.7868	4.3525	3.0972	2.915	2.9846	3.1786	3.6929
ENSG00000145428	RNF175	0.2437	0.4096	0.3432	0.4051	0.2821	0.3857	0.3364	0.3621	0.2782	1.9405	0.429	0.971	0.1375	0.1375
ENSG00000010610	CD4	3.6056	3.7502	4.4627	4.3565	3.7086	3.3265	5.7707	6.1647	5.761	5.6546	5.4044	6.2111	4.9768	4.086
ENSG00000271074	AC012491.1	0.1375	0.1375	0.1375	0.1375	0.1375	0.1375	0.1375	0.1375	0.1375	0.1375	0.1375	0.1375	0.1375	0.1375
ENSG00000242689	CNTF	1.468	0.4913	0.4577	1.2768	0.4991	0.6468	1.5538	0.5287	4.3078	3.8895	0.986	1.3555	0.818	0.1375
ENSG00000254455	HIGD1AP10	0.1375	0.1375	0.1375	0.1375	0.1375	0.1375	0.1375	0.1375	0.1375	0.1375	0.1375	0.1375	0.1375	0.1375
ENSG00000259076	AL049869.2	0.1375	0.1375	0.1375	0.1375	0.1375	0.1375	0.1375	0.1375	0.1375	0.1375	0.1375	0.1375	0.1375	0.1375
ENSG00000254274	TDGF1P5	0.1375	0.1375	0.1375	0.1375	0.299	0.1375	0.1375	0.1375	0.1375	0.1375	0.2089	0.1375	0.1375	0.1375
ENSG00000260963	AC026462.3	0.1375	0.1375	0.1375	0.1375	0.1375	0.1375	0.1375	0.1375	0.1375	0.1375	0.1375	0.1375	0.1375	0.1375
ENSG00000262855	AC012146.4	0.1375	0.1375	0.1375	0.1375	0.1375	0.1375	0.1375	0.1375	0.1375	0.1375	0.1375	0.1375	0.1375	0.1375
ENSG00000160293	VAV2	2.4334	3.2894	2.1424	2.2622	0.9899	0.8343	3.5933	5.0126	2.0094	2.1368	3.5901	4.4725	3.6126	2.2011
ENSG00000185053	SGCZ	0.1375	0.1375	0.1375	0.1375	0.1375	0.1375	0.1375	0.1375	0.1375	0.1375	0.1375	0.1375	0.1375	0.1375
ENSG00000201573	Y_RNA	0.1375	0.1375	0.1375	0.1375	0.1375	0.4603	0.3796	0.1375	0.2827	0.1375	0.1375	0.1375	0.1375	0.1375
ENSG00000011021	CLCN6	5.0195	5.7285	3.1219	3.4281	4.0492	3.8723	4.382	5.4627	4.3456	3.0879	4.5321	5.4709	4.353	2.587
ENSG00000266203	MIR5585	0.5288	0.9524	0.1375	0.1375	0.1375	0.1375	0.1375	0.1375	0.1375	0.1375	0.7652	0.9786	0.1375	0.1375
ENSG00000163348	PYGO2	1.4091	1.7111	1.2857	0.7707	2.0669	1.6459	3.1284	3.3777	2.944	2.2174	2.2738	2.4827	1.6835	3.5722
ENSG00000250295	RDH10-AS1	0.1375	0.1375	0.1375	0.2018	0.1375	0.1375	0.1375	0.2133	1.7055	0.1375	0.1375	0.1375	0.1375	0.1375
ENSG00000186026	ZNF284	0.2192	0.5508	0.2528	0.1375	0.6436	0.1717	0.5188	0.7477	1.4216	1.0508	0.284	0.3418	0.1375	0.1375
ENSG00000281780	snoZ196	0.1375	0.1375	0.1375	0.1375	0.4655	0.5141	0.1375	0.1375	0.1375	0.1375	0.2639	0.1375	0.1375	0.1375
ENSG00000251892	RNU7-84P	0.1375	0.1375	0.1375	0.1375	0.1375	0.1375	0.1375	0.1375	0.1375	0.1375	0.1375	0.1375	0.1375	0.1375
ENSG00000241923	RPL14P3	0.1375	0.1375	0.1375	0.1375	0.1375	0.1375	0.1375	0.1375	0.1375	0.1375	0.1375	0.1375	0.1375	0.1375
ENSG00000256671	LIMS4	0.1375	0.1375	0.1375	0.1375	0.1375	0.1375	0.1375	0.1375	0.1375	0.1375	0.1678	0.1375	0.1375	0.1375
ENSG00000115486	GGCX	2.4674	2.7023	2.184	1.7076	2.7362	2.1641	3.7571	3.8292	3.0221	2.0846	3.4551	3.7192	3.053	2.6629
ENSG00000140945	CDH13	0.1423	0.1463	0.1375	0.1375	0.1375	0.1375	0.1712	0.1513	0.4833	0.1375	0.1375	0.1589	0.1375	0.1375
ENSG00000259550	HNRNPA1P74	0.1375	0.1375	0.1375	0.1375	0.1375	0.1375	0.1375	0.1375	0.1375	0.1375	0.1375	0.1375	0.1375	0.1375
ENSG00000261763	AC110716.2	0.1375	0.1375	0.1375	0.1375	0.1375	0.1375	0.1375	0.1375	0.1375	0.1375	0.1375	0.1375	0.1375	0.1375
ENSG00000234003	MTATP6P27	0.1375	0.1375	0.1375	0.1375	0.1375	0.1375	0.1375	0.1375	0.1375	0.1375	0.1375	0.1375	0.1375	0.1375
ENSG00000173662	TAS1R1	0.1375	0.1375	0.1375	0.1375	0.1375	0.1375	0.1375	0.1375	0.1375	0.1375	0.1603	0.1375	0.1375	0.1375
ENSG00000252643	RNU6-1136P	0.1375	0.1375	0.1375	0.1375	0.1375	0.1375	0.3553	0.1375	0.1375	0.1375	0.1375	0.1375	0.1375	0.1375
ENSG00000269385	AC020895.1	2.2033	2.0506	3.2274	3.1942	1.7135	1.5341	2.0774	2.4227	0.858	0.1375	1.7992	1.8031	1.0751	0.1375
ENSG00000226028	PFN1P12	0.1375	0.1375	0.1375	0.1375	0.1375	0.1375	0.1375	0.1375	0.1375	0.1375	0.1375	0.1375	0.1375	0.1375
ENSG00000241217	RN7SL809P	1.018	1.0872	0.4798	1.1313	2.0119	2.1002	1.2719	1.3523	0.6549	0.1375	1.1466	1.3796	1.0335	0.1375
ENSG00000183977	PP2D1	0.1375	0.1375	0.1375	0.1836	0.1375	0.1375	0.1375	0.1375	0.1375	0.1375	0.1375	0.1375	0.1375	0.1375
ENSG00000157152	SYN2	1.3308	1.4138	0.5705	0.8273	0.6949	0.6311	0.8733	0.9812	1.5549	0.43	1.3006	2.0573	1.4621	0.7798
ENSG00000204516	MICB	2.4542	2.8164	2.6374	2.6354	3.2904	3.1153	4.1471	4.5403	3.2991	3.4451	4.7209	5.1973	3.0551	2.5296
ENSG00000252273	RNU6-426P	0.1375	0.1375	0.1375	0.1375	0.1375	0.1375	0.1375	0.1375	0.1375	0.1375	0.1375	0.1375	0.1375	0.1375
ENSG00000252407	RNU7-183P	1.15	0.1375	0.1375	0.1375	0.1375	0.1375	0.1375	0.1375	0.1375	0.1375	0.1375	0.1375	0.1375	0.1375
ENSG00000212122	TSSK1B	0.1375	0.1375	0.1375	0.1375	0.1375	0.1375	0.1375	0.1375	0.1375	0.1375	0.1375	0.1375	0.1375	0.1375
ENSG00000280893	AC009133.6	0.1375	0.1375	0.1375	0.1375	0.1375	0.1375	0.1375	0.1375	0.1375	0.1375	0.1375	0.1375	0.1375	0.1375
ENSG00000271671	AC107304.1	0.1375	0.1375	0.1375	0.1375	0.1375	0.1375	0.1375	0.1375	0.1375	0.1375	0.1375	0.1375	0.1375	0.1375
ENSG00000151718	WWC2	0.7473	0.8169	1.0737	0.843	1.1114	0.6522	1.2251	1.966	1.2442	1.2894	1.5516	1.8555	0.9377	1.0507
ENSG00000261367	AC012645.2	0.3025	0.1375	1.0683	0.8119	0.1375	0.5727	0.8671	1.6607	1.4815	2.0466	1.0195	1.1718	0.1375	3.5705
ENSG00000227744	LINC01940	0.1375	0.1375	0.1375	0.1375	0.1375	0.1375	0.1375	0.1375	0.1375	0.1375	0.1375	0.1375	0.1375	0.1375
ENSG00000237846	AL773545.3	0.1375	0.1375	0.1375	0.1375	0.1375	0.1375	0.1375	0.1375	0.1375	0.1375	0.5296	0.9974	0.1375	0.1375
ENSG00000120709	FAM53C	4.5021	5.9887	5.3643	5.262	6.013	6.1197	5.0983	6.5397	6.2732	5.9821	4.9829	5.7588	5.6811	7.1273
ENSG00000172689	MS4A10	0.1375	0.1375	0.1375	0.1375	0.1375	0.1375	0.1375	0.1375	0.1375	0.1375	0.1375	0.1375	0.1375	0.1375
ENSG00000207165	SNORA70	5.6338	0.3067	4.6685	5.8056	5.3075	5.3862	0.1697	3.4872	0.3537	0.4103	0.1715	0.2869	4.7228	0.1375
ENSG00000278532	AC026585.1	0.1375	0.1375	0.1375	0.1375	0.1375	0.1375	0.1375	0.1375	0.1375	0.1375	0.1375	0.1375	0.1375	0.1375
ENSG00000117682	DHDDS	2.6098	3.606	2.2661	2.3435	2.507	2.5761	3.7084	3.9004	3.5592	3.1428	3.4563	4.0411	4.4134	4.1267
ENSG00000120071	KANSL1	4.6537	4.7689	4.1146	4.4934	5.3079	5.4726	5.456	5.6889	4.3973	5.1548	5.3224	6.0163	5.4746	6.5974
ENSG00000237381	AL023280.1	0.1375	0.1375	0.1375	0.1375	0.1375	0.1375	0.1375	0.1375	0.1375	0.1375	0.1375	0.1375	0.1375	0.1375
ENSG00000197852	FAM212B	2.8809	3.6133	2.6491	2.5644	2.8268	3.1522	2.3527	3.5843	2.9076	2.6567	2.1893	2.644	3.2974	4.4576
ENSG00000172137	CALB2	0.1375	0.1375	0.1375	0.3705	0.1375	0.1375	0.9639	0.6287	0.1375	0.1375	0.1375	0.1375	0.1375	1.6046
ENSG00000233270	SNRPEP4	1.5113	1.8348	0.432	1.2508	0.5754	0.5544	1.1013	0.551	1.4921	1.4297	1.2727	1.4646	0.1375	0.1375
ENSG00000241490	AC093010.2	0.1375	0.2574	0.1762	0.1375	0.1969	0.1375	0.7157	0.738	0.2529	0.1375	0.1914	0.1375	0.1375	0.1375
ENSG00000182578	CSF1R	4.2295	4.2436	4.9648	4.5155	4.8473	4.4009	4.5464	6.1291	3.9159	5.3983	6.228	6.9397	5.6246	4.4099
ENSG00000244710	RN7SL47P	0.264	0.9941	0.6369	0.5005	0.1375	0.5809	0.1375	0.798	0.4691	0.1375	0.5263	1.2743	0.1375	0.1375
ENSG00000141505	ASGR1	0.9888	0.8894	1.3178	1.2211	1.6549	1.2631	1.1988	2.4661	1.9107	3.3951	1.9294	2.9281	0.5598	0.1375
ENSG00000126890	CTAG2	0.1375	0.2691	0.1375	0.1375	0.2272	0.1375	0.1375	0.1375	0.1375	0.1375	0.2032	0.1375	0.1375	0.1375
ENSG00000233586	AC246785.2	0.1375	0.3776	0.3521	0.1375	0.1375	0.1375	0.3081	0.536	0.6624	1.5027	0.6376	0.2974	0.1375	0.1375
ENSG00000248235	AC037459.1	0.1375	0.1375	0.1375	0.8798	0.3685	0.5021	0.588	1.8466	0.1375	0.1375	0.2851	0.5426	0.1375	0.1375
ENSG00000229893	AC005091.1	0.4602	0.6505	0.2346	0.2129	0.2128	0.2166	0.1375	0.1375	0.411	0.1375	0.2995	0.1375	0.1375	0.1375
ENSG00000167085	PHB	2.0403	2.705	2.3035	2.1562	2.1382	1.6647	3.8452	4.3465	4.047	4.7315	2.3571	3.1852	3.7945	4.4256
ENSG00000230086	VN1R96P	0.1375	0.1375	0.1375	0.1375	0.1375	0.1375	0.1375	0.1375	0.1375	0.1375	0.1375	0.1375	0.1375	0.1375
ENSG00000167468	GPX4	5.9165	6.707	5.2679	5.2872	4.6382	4.8054	6.83	7.3681	6.822	7.2111	7.0618	7.0145	7.4391	6.3654
ENSG00000174963	ZIC4	0.1375	0.1375	0.1375	0.1375	0.1375	0.1375	0.1375	0.1375	0.1375	0.1375	0.1375	0.1375	0.1375	0.1375
ENSG00000270061	AC068790.5	0.495	1.4579	0.2847	0.4744	0.7491	1.0667	2.2444	1.5819	0.87	0.1375	2.236	2.003	2.7793	0.1375
ENSG00000275286	AC025253.1	0.1375	0.1375	0.1375	0.1375	0.1375	0.1375	0.1375	0.1375	0.1375	0.1375	0.1375	0.1375	0.1375	0.1375
ENSG00000133731	IMPA1	3.2865	3.5403	2.5605	2.0779	3.1831	2.7187	3.9771	3.1435	3.8081	3.3272	3.5412	3.7227	1.9795	0.1375
ENSG00000237601	AP000358.1	0.1375	0.1375	0.1375	0.1375	0.1375	0.1375	0.1375	0.1375	0.1375	0.1375	0.1375	0.1375	0.1375	0.1375
ENSG00000281311	SNORA50	0.1383	0.138	0.1378	0.1428	0.1456	0.1376	0.1389	0.1409	0.1377	0.1375	0.1384	0.1545	1.1661	0.2624
ENSG00000167619	TMEM145	0.1375	0.1375	0.1375	0.1375	0.1883	0.1375	0.1375	0.1375	0.1375	0.1375	0.1375	0.3324	0.1375	0.1375
ENSG00000145642	FAM159B	0.1375	0.1375	0.1375	0.1375	0.1375	0.1375	0.1375	0.1375	0.1375	0.1375	0.1375	0.1375	0.1375	0.1375
ENSG00000254907	AC087276.2	0.1375	0.1375	0.1375	0.1375	0.1375	0.1375	0.2214	0.1375	0.3522	0.1375	0.1375	0.1375	0.1375	0.1375
ENSG00000145623	OSMR	0.179	0.1375	0.1375	0.1566	0.1699	0.238	1.6852	0.7579	2.5856	1.1213	0.2931	0.3079	0.1375	0.1375
ENSG00000283706	PRSS50	0.1375	0.1375	0.1375	0.1375	0.1375	0.1375	0.1375	0.1375	0.1375	0.1375	0.1375	0.1375	0.1375	0.1375
ENSG00000248223	AC026785.2	0.3081	0.1375	0.1375	0.3651	0.1375	0.1375	0.288	0.1375	0.3337	0.1375	0.2125	0.1375	0.1375	0.1375
ENSG00000180440	SERTM1	0.1375	0.1375	0.1375	0.1375	0.1375	0.1375	0.1375	0.1375	0.1375	0.1375	0.1375	0.1375	0.1375	0.1375
ENSG00000188693	CYP51A1-AS1	0.3749	0.3737	0.1375	0.2082	0.1375	0.1375	0.258	0.1375	0.3773	0.7635	0.1996	0.3959	0.1375	0.1375
ENSG00000242320	RPL21P126	0.1375	0.1375	0.1375	0.1375	0.1375	0.1375	0.1375	0.1375	0.1375	0.1375	0.1375	0.1375	0.1375	0.1375
ENSG00000284360	MIR6125	0.1883	1.333	0.1683	0.1397	0.6542	0.1485	0.1855	1.0954	0.1376	3.0311	0.1689	0.1941	0.5067	2.1147
ENSG00000251123	AC084752.1	0.1375	0.1375	0.1375	0.1375	0.1375	0.1375	0.1375	0.1375	0.1375	0.1375	0.1375	0.1375	0.1375	0.1375
ENSG00000276867	AC074050.4	0.2787	0.1375	0.5278	0.1375	0.2213	0.1375	0.783	1.1241	0.1375	0.1375	0.7541	0.7411	0.1375	0.1375
ENSG00000115919	KYNU	5.7901	5.4852	5.5425	5.3524	4.2764	3.7371	5.6694	5.8899	4.3353	5.4662	7.289	6.6807	6.2667	1.8572
ENSG00000229676	ZNF492	0.1375	0.1375	0.1375	0.1375	0.1375	0.1375	0.1945	0.1375	0.2992	0.1375	0.1686	0.1375	0.1375	0.1375
ENSG00000225147	RPS12P10	0.1375	0.1375	0.1375	0.1375	0.1375	0.1375	0.1375	0.1375	0.1375	0.1375	0.1375	0.1375	0.1375	0.1375
ENSG00000144649	FAM198A	0.2161	0.1828	0.1375	0.1777	0.1912	0.1375	0.2224	0.1375	0.2939	0.1375	0.1993	0.1375	0.1375	0.1375
ENSG00000181751	C5orf30	0.4254	0.8461	0.4911	0.2864	0.4515	0.2572	0.8199	0.6	2.8948	0.8576	1.1325	0.7071	1.1484	0.1375
ENSG00000232006	AC005537.1	0.1375	0.1375	0.1375	0.1375	0.1375	0.1375	0.2881	0.1375	1.7296	0.1375	0.1375	0.3218	0.1375	0.1375
ENSG00000135966	TGFBRAP1	1.6735	2.0719	1.6779	1.5123	1.1553	0.9875	2.1263	2.4599	2.097	2.2993	1.5124	1.9137	2.4551	3.0814
ENSG00000254175	IGLVI-42	0.1375	0.1375	0.1375	0.1375	0.1375	0.1375	0.1375	0.1375	0.1375	0.1375	0.1375	0.1375	0.1375	0.1375
ENSG00000054116	TRAPPC3	3.98	4.878	3.6151	3.6087	3.7376	4.1383	4.6837	5.5138	4.5729	4.791	4.5357	4.8793	4.648	4.4594
ENSG00000279531	AC022140.2	0.1375	0.1375	0.1375	0.1375	0.1375	0.1375	0.1375	0.1375	0.1375	0.1375	0.1375	0.1375	0.1375	0.1375
ENSG00000270960	AC106872.11	0.1375	0.1375	0.1375	0.1375	0.1375	0.1375	0.1375	0.1375	0.1375	0.1375	0.1375	0.1375	0.1375	0.1375
ENSG00000252015	RNU6-904P	0.1375	0.1375	0.1375	0.1375	0.1375	0.1375	0.1375	0.1375	0.1375	0.1375	0.1375	0.1375	0.1375	0.1375
ENSG00000245685	FRG1-DT	0.4358	0.5759	0.3265	0.1375	0.1375	0.1375	0.1375	0.445	0.8066	0.1375	0.1375	0.4037	0.1375	0.1375
ENSG00000132256	TRIM5	2.861	3.4009	2.9169	2.8405	3.5697	3.9253	4.5819	5.4641	3.7736	4.1385	5.3514	6.4752	3.1657	4.0717
ENSG00000111664	GNB3	0.1375	0.1375	0.1375	0.1742	0.1375	0.1375	0.2309	0.3698	0.1375	0.1375	0.1375	0.1375	0.1375	0.1375
ENSG00000269037	LINC01838	0.1375	0.1375	0.1375	0.1375	0.1375	0.1375	0.1375	0.1375	0.1375	0.1375	0.1375	0.1375	0.1375	0.1375
ENSG00000196150	ZNF250	4.1753	4.0612	4.3546	4.5652	4.5478	4.9891	2.723	3.6609	3.8427	2.9182	2.0713	2.158	2.7825	2.2305
ENSG00000248903	AP000867.1	0.1375	0.1375	0.1375	0.1375	0.1375	0.1375	0.1375	0.1375	0.1375	0.1375	0.1375	0.1375	0.1375	0.1375
ENSG00000205356	TECPR1	3.2691	3.7791	3.1536	3.1968	4.7763	5.1265	3.824	4.6017	4.2586	4.7818	3.9765	4.7523	3.5365	4.6057
ENSG00000230990	AL049649.1	0.1375	0.1375	0.1375	0.1375	0.1375	0.1375	0.1375	0.1375	0.1375	0.1375	0.1375	0.1375	0.1375	0.1375
ENSG00000241361	SLC25A24P1	0.1375	0.1375	0.1375	0.1375	0.1375	0.1375	0.1375	0.1375	0.1375	0.1375	0.1375	0.1375	0.1375	0.1375
ENSG00000270445	AC145423.1	0.3554	0.8102	0.1375	0.66	0.1375	0.1375	1.4145	0.1375	0.1375	0.1375	0.2341	0.1375	0.1375	0.1375
ENSG00000253293	HOXA10	0.1375	0.1375	0.1375	0.1791	0.173	0.1375	0.1375	0.1375	0.1375	0.1375	0.1375	0.257	0.1375	1.7051
ENSG00000221763	MIR1289-1	0.1375	0.1375	0.1375	0.1375	0.1375	0.1375	0.1375	0.1375	0.1375	0.1375	0.1375	0.1375	0.1375	0.1375
ENSG00000207725	MIR222	1.8428	1.9061	2.1939	0.8551	0.7364	1.553	0.9645	1.498	0.9798	0.8113	2.3269	1.8065	1.4047	0.1375
ENSG00000207802	MIR646	1.2776	0.8676	1.04	1.7385	1.7151	1.8997	2.12	1.9319	3.0721	0.1375	0.1375	0.1375	0.1375	0.1375
ENSG00000171659	GPR34	0.6467	0.5816	0.5098	0.3426	0.6	0.3026	0.5295	0.1375	0.3947	0.8379	0.3737	0.4924	2.3636	0.1375
ENSG00000006116	CACNG3	0.3349	0.5416	0.1717	0.2047	0.2311	0.3678	0.1375	0.1375	0.1375	0.1375	0.1375	0.1375	0.1375	0.1375
ENSG00000122584	NXPH1	0.1375	0.1375	0.1375	0.1375	0.1375	0.1375	0.1375	0.1375	0.1375	0.1375	0.1375	0.1375	0.1375	0.1375
ENSG00000221598	MIR1249	0.1375	0.8589	0.1375	0.453	0.1375	0.6169	0.5941	1.1372	1.6422	0.1375	0.5178	1.2345	0.1375	0.1375
ENSG00000250046	AC106864.2	0.1375	0.1375	0.1375	0.1375	0.1375	0.1375	0.1375	0.1375	0.1375	0.1375	0.1375	0.1375	0.1375	0.1375
ENSG00000230401	LINC01972	0.1375	0.1375	0.1375	0.1375	0.1375	0.1375	0.1375	0.1375	0.1375	0.1375	0.1375	0.1375	0.1375	0.1375
ENSG00000274584	AP001282.2	0.1375	0.1375	0.1375	0.1375	0.1375	0.1375	0.1375	0.1375	0.1375	0.1375	0.1375	0.1375	0.1375	0.1375
ENSG00000111837	MAK	1.9709	1.988	1.7759	1.8777	2.0017	2.2006	2.6569	2.2216	5.2694	4.3795	1.6171	1.7063	1.4376	2.2432
ENSG00000124145	SDC4	5.3976	6.1567	4.7175	4.6235	3.2475	3.695	6.5305	7.4724	7.1738	8.1009	7.1575	7.2931	7.0765	4.9567
ENSG00000270387	AC115621.1	0.1375	0.1375	0.1375	0.1375	0.1375	0.1375	0.1375	0.1375	0.1375	0.1375	0.1375	0.1375	0.1375	0.1375
ENSG00000106688	SLC1A1	0.1375	0.1375	0.1375	0.1375	0.1859	0.1629	0.458	0.3911	0.5728	0.1375	0.1905	0.1375	0.1375	0.6848
ENSG00000257137	C12orf80	0.2672	0.1375	0.1375	0.1375	0.1375	0.1375	0.1375	0.1375	0.1375	0.1375	0.1375	0.1375	0.1375	0.1375
ENSG00000233357	RPL30P15	0.1375	0.1375	0.1375	0.1375	0.1375	0.1375	0.1375	0.1375	0.1375	0.1375	0.1375	0.1375	0.1375	0.1375
ENSG00000270371	AL122127.1	0.1375	0.1375	0.1375	0.1375	0.1375	0.1375	0.1375	0.1375	0.1375	0.1375	0.1375	0.1375	0.1375	0.1375
ENSG00000181404	WASHC1	0.8661	1.6217	1.4652	1.4771	2.2357	2.38	2.9312	3.6173	1.6255	1.7379	1.945	2.805	1.781	2.0756
ENSG00000232537	AC092810.3	0.1375	0.1375	0.1375	0.1375	0.1375	0.1375	0.1375	0.1375	0.1375	0.1375	0.1375	0.1375	0.1375	0.1375
ENSG00000131653	TRAF7	2.4336	3.0332	2.4215	2.3272	3.2272	2.9724	4.3211	4.9245	4.6525	4.185	3.3893	4.3169	4.2429	4.4606
ENSG00000267515	AP001029.3	0.1375	0.1375	0.1375	0.1375	0.1375	0.1375	0.1375	0.2915	0.1375	0.1375	0.1375	0.1375	0.1375	0.1375
ENSG00000235060	VDAC1P4	0.1375	0.1375	0.1375	0.1375	0.1375	0.1375	0.1375	0.1375	0.1375	0.1375	0.1375	0.1375	0.1375	0.1375
ENSG00000235124	KRT8P17	0.1375	0.1375	0.1375	0.1375	0.1375	0.1375	0.1375	0.1375	0.1375	0.1375	0.1375	0.1375	0.1375	0.1375
ENSG00000104974	LILRA1	2.9737	3.382	3.9991	3.5341	4.1934	4.078	2.3355	2.918	3.8682	4.9848	4.6789	5.1623	2.7733	3.9597
ENSG00000200097	RNU6-1167P	0.1375	0.1375	0.1375	0.1375	0.1375	0.1375	0.1375	0.1375	0.1375	0.1375	0.1375	0.1375	0.1375	0.1375
ENSG00000240486	RPL23AP54	0.1375	0.1375	0.1375	0.1375	0.1375	0.1375	0.1375	0.1375	0.1375	0.1375	0.1375	0.1375	0.1375	0.1375
ENSG00000259082	LINC02314	0.1375	0.1375	0.1375	0.1375	0.1375	0.1375	0.1375	0.1375	0.1375	0.1375	0.1375	0.1375	0.1375	0.1375
ENSG00000277227	AL359741.1	0.1375	0.1375	0.1375	0.1375	0.1375	0.1375	0.1375	0.1375	0.1375	0.1375	0.1375	0.1375	0.1375	0.1375
ENSG00000266188	MIR5095	0.1375	0.1375	0.1375	0.1375	0.1375	0.1375	0.1375	0.1375	0.4432	0.1375	0.2393	0.1375	0.1375	0.1375
ENSG00000211656	IGLV2-33	0.1375	0.1375	0.1375	0.1375	0.1375	0.1375	0.1375	0.1375	0.1375	0.1375	0.2529	0.1375	0.1375	0.1375
ENSG00000231292	IGKV1OR2-108	0.1375	0.1375	0.1375	0.1375	0.1375	0.1375	0.1375	0.1375	0.1375	0.1375	0.6565	0.1375	0.1375	0.1375
ENSG00000258345	AC034102.7	0.1375	0.1375	0.1375	0.1375	0.1375	0.1375	0.1375	0.1375	0.1375	0.1375	0.1375	0.1375	0.1375	0.1375
ENSG00000203972	GLYATL3	0.1375	0.1375	0.1375	0.1375	0.1375	0.1375	0.1375	0.1375	0.1375	0.1375	0.1375	0.1375	0.1375	0.1375
ENSG00000278523	Y_RNA	0.1375	0.1375	0.1375	0.1375	0.1375	0.1375	0.1375	0.1375	0.1375	0.1375	0.1375	0.1375	0.1375	0.1375
ENSG00000231436	RBMY3AP	0.1375	0.1375	0.1375	0.1375	0.1375	0.1375	0.1375	0.1375	0.1375	0.1375	0.1375	0.1375	0.1375	0.1375
ENSG00000252297	RNU6-875P	0.1375	0.1375	0.1375	0.1375	0.1375	0.1375	0.1375	0.1375	0.1375	0.1375	0.1375	0.1375	0.1375	0.1375
ENSG00000279804	PRAMEF18	0.1375	0.1375	0.1375	0.1375	0.1375	0.1375	0.1375	0.1375	0.1375	0.1375	0.1375	0.1375	0.1375	0.1375
ENSG00000221845	C7orf65	0.1375	0.1375	0.1375	0.1375	0.1375	0.1375	0.1375	0.1375	0.1375	0.1375	0.1375	0.1375	0.1375	0.1375
ENSG00000125900	SIRPD	2.3759	2.9907	1.8415	1.6258	2.9023	3.1438	1.1268	0.5219	0.9365	0.5396	2.2411	2.1797	1.489	0.1375
ENSG00000200204	RNU1-22P	0.1375	0.1375	0.1375	0.1375	0.1375	0.1375	0.1375	0.1375	0.1375	0.1375	0.1375	0.6029	0.1375	0.1375
ENSG00000232355	AL603650.1	0.1375	0.1375	0.1375	0.1375	0.1375	0.1375	0.1375	0.1375	0.1375	0.1375	0.1375	0.1375	0.1375	0.1375
ENSG00000278635	AC141557.2	0.1375	0.1375	0.1375	0.1375	0.1375	0.1375	0.1375	0.1375	0.1375	0.1375	0.1375	0.1375	0.1375	0.1375
ENSG00000249506	ZEB2P1	0.1375	0.1979	0.1375	0.1375	0.1375	0.1375	0.1375	0.1375	0.1375	0.1375	0.1375	0.1375	0.1375	0.1375
ENSG00000230337	AL109811.2	0.1375	0.1375	0.1375	0.1375	0.1375	0.1375	0.1375	0.1375	2.4783	0.1375	0.2817	0.1375	0.1375	0.1375
ENSG00000155011	DKK2	0.2518	0.2738	0.1695	0.1943	0.1375	0.1375	0.1375	0.1375	0.2569	1.0551	0.3268	0.3156	1.1709	0.1375
ENSG00000111860	CEP85L	1.6896	1.4043	1.2949	1.0042	2.1382	1.2403	2.5856	2.6684	2.4568	2.1398	2.4688	1.8812	2.087	0.4324
ENSG00000118777	ABCG2	0.206	0.423	0.1375	0.1612	0.1375	0.1375	0.176	0.7007	0.2978	2.3859	0.1897	0.3184	2.6895	0.1375
ENSG00000166974	MAPRE2	4.012	4.5251	3.0268	3.187	2.7609	2.9857	3.6277	4.0634	3.7881	4.0417	3.807	3.9379	4.0091	3.6194
ENSG00000200680	SNORD115-4	0.1375	0.1375	0.1375	0.1375	0.1375	0.1375	0.1375	0.1375	0.1375	0.1375	0.1375	0.1375	0.1375	0.1375
ENSG00000169436	COL22A1	0.1375	0.3266	0.1375	0.2028	0.1874	0.1375	0.1375	0.177	0.1375	0.3709	0.4142	0.6089	0.3998	0.1375
ENSG00000180066	C10orf91	0.9851	1.4663	0.3731	0.6016	0.1375	0.1375	0.4817	0.3877	0.4041	0.1375	0.884	1.1064	0.7634	0.1375
ENSG00000102349	KLF8	0.2369	0.3086	0.1874	0.1375	0.2807	0.2106	0.4038	0.5052	0.4585	0.5785	0.3351	0.3347	0.7832	0.1375
ENSG00000284368	MIR5047	0.3335	0.5182	0.4273	0.3874	0.3765	0.4187	0.3972	0.556	0.1401	1.226	0.3005	0.6395	1.2817	0.4892
ENSG00000263895	AC100778.1	0.994	0.7786	0.2751	0.6695	0.6219	0.4222	1.049	0.4984	0.1375	0.1375	0.9052	0.7454	0.1375	0.1375
ENSG00000237628	MTCO2P19	0.1375	0.2388	0.1375	0.1375	0.1375	0.1375	0.285	0.1375	0.1375	0.1375	0.4403	0.1375	0.1375	0.1375
ENSG00000227979	AC002127.1	0.1375	0.1375	0.1375	0.1375	0.1375	0.1375	0.1375	0.1375	0.1375	0.1375	0.1375	0.1375	0.1375	0.1375
ENSG00000169223	LMAN2	4.3011	4.855	4.0799	4.3008	5.1418	5.2769	5.2609	6.0655	4.9976	5.1798	5.3808	6.0941	5.8505	6.1577
ENSG00000235526	AL355990.2	0.1375	0.1375	0.1375	0.1375	0.1375	0.1375	0.1375	0.1375	0.1375	0.1375	0.1375	0.1375	0.1375	0.1375
ENSG00000280132	AC026471.6	0.1375	0.1375	0.1375	0.1375	0.1375	0.1375	0.2745	0.2022	0.1375	0.1375	0.2861	0.1375	0.1375	0.1375
ENSG00000163050	COQ8A	1.6891	2.5689	1.1476	1.0005	1.4317	1.5358	2.5413	3.4667	3.3651	2.7779	2.0179	2.3168	2.1064	2.9524
ENSG00000248468	AC107027.1	0.1375	0.1375	0.1375	0.1375	0.1375	0.1375	0.1375	0.1375	0.1375	0.1375	0.1375	0.1375	0.1375	0.1375
ENSG00000235724	AC009299.3	0.3984	0.1375	0.1375	0.1375	0.1375	0.1375	0.1375	0.1375	0.1375	0.1375	0.558	0.1375	0.1375	0.1375
ENSG00000173599	PC	1.5799	2.3958	0.6444	1.635	0.9252	0.8846	1.4615	3.21	2.4578	3.241	0.9596	1.6696	3.5878	4.0597
ENSG00000239919	SNRPGP3	0.3019	1.1404	0.1375	0.1375	0.327	0.1375	0.6029	0.1375	0.1375	1.6131	1.3018	1.573	0.1375	0.1375
ENSG00000151150	ANK3	0.4598	1.1023	0.727	0.3903	0.8532	0.6537	3.1853	2.4631	4.6384	4.6447	2.4895	2.6948	1.9911	2.5361
ENSG00000233036	KRTAP8-2P	0.1375	0.1375	0.1375	0.1375	0.1375	0.1375	0.1375	0.1375	0.1375	0.1375	0.1375	0.1375	0.1375	0.1375
ENSG00000160200	CBS	0.3922	0.6872	0.1375	0.1375	0.8483	1.0225	0.1375	0.5262	0.1375	0.1375	0.1375	0.1375	0.1375	0.1375
ENSG00000134809	TIMM10	3.139	3.3749	2.3478	2.3988	4.4715	4.7875	4.7474	5.8387	3.1928	4.5022	4.4445	5.3093	3.8198	4.0911
ENSG00000101945	SUV39H1	1.0545	1.2029	0.3972	0.6289	0.9683	0.4015	1.2993	1.9257	1.6948	0.8795	1.1074	1.5134	1.0282	0.1375
ENSG00000226413	OR8T1P	0.1375	0.1375	0.1375	0.1375	0.1375	0.1375	0.1375	0.1375	0.1375	0.1375	0.1375	0.1375	0.1375	0.1375
ENSG00000204193	TXNDC8	0.1375	0.1375	0.1375	0.1375	0.1375	0.1375	0.1886	0.1375	0.1375	0.1375	0.1375	0.1375	0.1375	0.1375
ENSG00000250863	AC110799.1	0.1375	0.1375	0.1375	0.1375	0.1375	0.1375	0.1375	0.1375	0.1375	0.1375	0.1375	0.1375	0.1375	0.1375
ENSG00000212389	RNU6-1275P	0.9842	0.1375	0.5221	0.3458	0.1375	0.3371	0.1375	0.1375	0.1375	0.1375	0.1375	1.0709	0.1375	0.1375
ENSG00000269095	AC010646.1	0.1375	0.1375	0.1375	0.1375	0.1375	0.1375	0.1375	0.1375	0.1375	0.1375	0.1375	0.1375	0.1375	0.1375
ENSG00000258415	AC060814.1	0.1375	0.1375	0.1375	0.1375	0.1375	0.1375	0.1375	0.1375	0.1375	0.1375	0.1375	0.1375	0.1375	0.1375
ENSG00000156831	NSMCE2	5.6319	6.2504	4.8099	5.4749	3.6458	3.6487	4.0203	3.8111	5.8431	4.3117	3.6973	3.9943	5.4182	2.6771
ENSG00000196946	ZNF705A	1.3084	1.0178	0.986	1.4754	0.6858	0.5884	0.2656	0.3082	0.7582	0.4391	0.2486	0.2343	0.5116	0.1375
ENSG00000051108	HERPUD1	6.5576	6.9854	6.488	6.8316	4.5037	4.498	5.2117	5.3331	7.2839	7.2876	6.3791	6.7855	7.3062	7.2819
ENSG00000238735	RNU7-113P	0.1375	1.4947	1.5106	0.7716	0.1375	0.1375	0.5541	0.2907	0.1375	0.1375	0.5765	0.1375	1.1207	0.1375
ENSG00000181215	C4orf50	0.1676	0.1375	0.1375	0.1454	0.1444	0.1924	0.1979	0.2029	0.1375	0.1375	0.1575	0.1726	0.1375	0.1375
ENSG00000234255	AC012370.2	0.1375	0.1375	0.1375	0.1375	0.1375	0.1375	0.1375	0.1375	0.1375	0.1375	0.1375	0.1375	0.1375	0.1375
ENSG00000284693	AL928921.2	0.1678	0.1375	0.185	0.1375	0.1375	0.1375	0.1375	0.2846	0.4963	0.1375	0.1375	0.1375	0.1375	0.1375
ENSG00000072134	EPN2	0.546	0.507	0.4251	0.954	0.2659	0.7642	2.3355	2.4865	4.6152	3.1806	0.4541	0.5776	0.7594	1.185
ENSG00000236383	LINC00854	0.2885	0.6525	0.4219	0.6715	0.1375	0.1375	0.3095	0.2899	2.1617	0.1375	1.1883	0.955	0.1375	0.1375
ENSG00000124092	CTCFL	0.1375	0.1375	0.1375	0.1375	0.1375	0.1375	0.1375	0.1375	0.1375	0.1375	0.1375	0.1375	0.1375	0.1375
ENSG00000136875	PRPF4	2.2624	2.0108	2.0107	1.9243	2.204	1.729	2.7928	2.9178	3.4715	2.6157	2.5009	2.8413	3.1309	1.8358
ENSG00000228247	UBBP2	0.1375	0.1375	0.1375	0.1375	0.1375	0.1375	0.1375	0.1375	0.1375	0.1375	0.1375	0.1375	0.1375	0.1375
ENSG00000256020	AC006205.2	0.8828	1.5326	1.0842	0.9982	1.4438	1.6459	1.1729	1.259	0.1375	0.1375	0.4646	0.1375	0.1375	0.1375
ENSG00000168273	SMIM4	1.2832	2.3914	1.7102	0.5143	1.3432	0.6156	1.9041	2.1456	2.1663	1.3771	1.7329	1.5538	1.4778	1.4409
ENSG00000252454	MIR2114	0.1375	0.1375	0.1375	0.1375	0.1375	0.1375	0.1375	0.1375	0.1375	0.1375	0.1375	0.1375	0.1375	0.1375
ENSG00000120669	SOHLH2	0.1375	0.1375	0.1375	0.1375	0.1375	0.2586	0.1375	0.1375	0.1375	0.1375	0.1375	0.3765	0.1375	0.1375
ENSG00000267432	DNAH17-AS1	0.7047	1.3321	0.3224	0.3948	0.2332	0.237	2.0186	2.6865	0.4857	0.3712	0.2693	0.5977	1.9512	0.1375
ENSG00000282059	CICP19	0.1375	0.1375	0.1375	0.1375	0.1375	0.1375	0.1375	0.1375	0.1375	0.1375	0.1375	0.1375	0.1375	0.1375
ENSG00000274827	LINC01297	0.1375	0.1375	0.1375	0.1375	0.1375	0.1375	0.1375	0.1375	0.1375	0.1375	0.1375	0.1375	0.1375	0.1375
ENSG00000160886	LY6K	0.2751	0.1375	0.1375	0.3732	0.2453	0.5555	1.5741	0.7162	0.5693	1.8164	0.2859	0.4407	1.233	2.7573
ENSG00000220758	VN1R10P	0.1375	0.1375	0.1375	0.1375	0.1375	0.1375	0.1375	0.1375	0.1375	0.1375	0.1375	0.1375	0.1375	0.1375
ENSG00000270972	AC136475.9	3.418	3.0769	4.0238	3.8863	3.7139	4.4157	3.0547	2.954	2.5653	2.6413	3.8924	4.456	3.1289	0.1375
ENSG00000280208	GGT4P	0.1375	0.1375	0.1375	0.1375	0.1375	0.1375	0.1375	0.1375	0.1375	0.1375	0.1375	0.1375	0.1375	0.1375
ENSG00000213423	RBMX2P2	0.1375	0.1375	0.1375	0.1375	0.1375	0.1375	0.1375	0.1375	0.1375	0.1375	0.1375	0.1375	0.1375	0.1375
ENSG00000226068	HNRNPA3P4	0.1375	0.1375	0.1733	0.1375	0.1375	0.2296	0.1375	0.1375	0.1375	0.1375	0.1989	0.1375	0.1375	0.1375
ENSG00000252466	MIR2115	0.1375	0.1375	0.1375	0.1375	0.1375	0.2769	0.1375	0.1375	0.1375	0.1375	0.1375	0.1375	0.1375	0.1375
ENSG00000252051	RN7SKP276	0.1375	0.1375	0.1375	0.1375	0.1375	0.1375	0.1375	0.1375	0.1375	0.1375	0.1375	0.1375	0.1375	0.1375
ENSG00000255183	AP000756.1	0.1375	0.1375	0.1375	0.1375	0.1375	0.1375	0.1375	0.1375	0.1375	0.1375	0.1375	0.1375	0.1375	0.1375
ENSG00000235274	Z75741.2	0.1375	0.1375	0.1375	0.1375	0.1375	0.1375	0.1375	0.1375	0.1375	0.1375	0.1375	0.1375	0.1375	0.1375
ENSG00000226954	AL023802.1	0.1788	0.1938	0.2285	0.1375	0.1375	0.1375	0.2075	0.2638	0.1375	0.1375	0.5716	0.4699	0.3185	0.1375
ENSG00000241613	RN7SL618P	0.1375	0.1375	0.1375	0.1375	0.1375	0.1375	0.1375	0.1375	0.1375	0.1375	0.1375	0.1375	0.1375	0.1375
ENSG00000237772	AC092620.1	2.5907	2.0017	2.1094	1.6991	1.5464	1.5475	0.4326	1.2432	1.1256	1.887	0.4189	1.0148	0.1375	0.1375
ENSG00000201392	RNU6-1078P	0.1375	0.1375	0.1375	0.1375	0.1375	0.1375	0.1375	0.1375	0.1375	0.1375	0.1375	0.1375	0.1375	0.1375
ENSG00000227992	AC108463.1	0.6607	0.1375	0.1375	0.1375	1.0577	0.4693	0.8878	0.1375	0.1375	0.1375	0.1375	0.1375	0.1375	0.1375
ENSG00000169062	UPF3A	1.4972	2.5401	2.1528	1.9574	2.0744	1.816	3.1649	3.7171	2.9526	2.6489	2.768	3.1971	3.7806	4.0091
ENSG00000240874	AC025271.1	0.1375	0.1375	0.1375	0.1375	0.1375	0.1375	0.1375	0.1375	0.1375	0.1375	0.1375	0.1375	0.1375	0.1375
ENSG00000007923	DNAJC11	1.5619	1.8186	1.8021	1.7683	2.0744	1.5513	2.8493	3.6576	2.3993	2.1434	2.2479	3.1795	2.5422	1.4971
ENSG00000255338	AC118273.2	0.1375	0.1375	0.1375	0.1375	0.1375	0.1375	0.1375	0.1375	0.1375	0.1375	0.1375	0.1375	0.1375	0.1375
ENSG00000152433	ZNF547	0.3986	0.8084	0.661	1.1129	0.3295	0.3758	0.85	0.5495	1.7181	1.7863	0.7752	0.9142	1.0567	0.1375
ENSG00000283128	AC009403.2	0.1375	0.1375	0.1375	0.1375	0.1375	0.1986	0.2489	0.4967	0.2939	0.1375	0.1657	0.1841	0.1375	0.1375
ENSG00000203943	SAMD13	0.1375	0.1375	0.1375	0.1375	0.1375	0.1375	0.1375	0.1375	1.0679	0.1375	0.1914	0.1375	0.1375	0.1375
ENSG00000231915	SALL4P5	0.1375	0.1375	0.1375	0.1375	0.1375	0.1375	0.1375	0.1375	0.1375	0.1375	0.1375	0.1375	0.1375	0.1375
ENSG00000273343	AC007663.4	0.1375	0.5074	0.1375	0.4408	0.378	0.1375	0.3098	0.3258	0.1375	0.1375	0.3361	0.1375	0.1375	0.1375
ENSG00000277630	BX072566.1	0.1375	0.1375	0.1375	0.1375	0.1375	0.1375	0.1375	0.1375	0.1375	0.1375	0.1375	0.1375	0.1375	0.1375
ENSG00000250057	AC114781.2	1.0682	0.8001	0.7118	0.7225	1.9902	1.9767	0.3518	0.1375	0.1375	0.1375	0.5889	0.1375	0.1375	0.1375
ENSG00000130699	TAF4	1.7582	1.7892	1.5082	1.7683	1.9829	1.4417	2.4607	3.4991	2.2681	1.1371	1.8683	2.5872	2.5033	2.5439
ENSG00000233664	NDUFS5P3	0.1375	0.1375	0.1375	0.1375	0.1375	0.4045	0.1898	0.1375	0.1375	0.1375	0.3293	0.1375	0.1375	0.1375
ENSG00000240457	RN7SL472P	3.0898	3.3004	4.9352	4.7941	2.0048	1.1018	3.2419	3.6024	4.7669	1.9803	1.8372	2.6654	2.6707	2.4775
ENSG00000279168	AC105052.4	0.2452	0.5158	0.2615	0.6963	0.1375	0.1676	0.1375	0.1375	0.1375	0.1375	0.1746	0.2579	0.1375	0.1375
ENSG00000253388	AC124067.1	0.1375	0.1375	0.1375	0.1375	0.1375	0.1375	0.1375	0.1375	0.1375	0.1375	0.1375	0.1375	0.1375	0.1375
ENSG00000203970	DEFB110	0.1375	0.1375	0.1375	0.1375	0.1375	0.1375	0.1375	0.1375	0.1375	0.1375	0.1375	0.1375	0.1375	0.1375
ENSG00000184205	TSPYL2	3.4489	4.0791	3.5491	3.6645	1.5418	0.7689	3.3934	4.1923	2.2722	2.0972	4.3541	5.09	3.816	2.8699
ENSG00000169683	LRRC45	0.2848	0.7558	0.6751	0.3319	0.8525	0.6414	2.8234	3.4135	4.8332	4.2143	1.2134	1.5011	0.1375	0.8511
ENSG00000105401	CDC37	5.6395	6.5693	5.5357	6.1132	5.4628	5.2709	6.2142	6.9858	5.2069	6.7021	6.7715	7.355	6.4481	6.6759
ENSG00000274052	OR7E156P	0.1375	0.1375	0.1375	0.1375	0.1375	0.1375	0.1375	0.1375	0.1375	0.1375	0.1375	0.1375	0.1375	0.1375
ENSG00000252530	RNU6-965P	0.1375	0.1375	0.1375	0.1375	0.1375	0.1375	0.1375	0.1375	0.1375	0.1375	0.1375	0.1375	0.1375	0.1375
ENSG00000261044	AP006547.1	0.1375	0.1375	0.1375	0.1375	0.1375	0.1375	0.1375	0.1375	0.1375	0.1375	0.1375	0.1375	0.1375	0.1375
ENSG00000010270	STARD3NL	4.1306	4.4567	3.5911	4.0447	2.9923	2.6193	3.9157	4.3367	4.4438	4.3841	4.5665	4.4424	4.5237	1.3826
ENSG00000254697	COPS8P3	0.1375	0.1375	0.1375	0.1375	0.1375	0.1375	0.1375	0.1375	0.1375	0.1375	0.1375	0.1375	0.1375	0.1375
ENSG00000223552	AC098613.1	5.7085	6.1317	3.6102	4.0306	4.1559	3.907	3.9596	3.6517	2.9763	1.3737	3.4609	3.6903	4.7543	2.8063
ENSG00000278854	AC007275.1	0.1375	0.1375	0.1375	0.1375	0.1375	0.1375	0.1375	0.1375	0.1375	0.1375	0.1375	0.1375	0.1375	0.1375
ENSG00000108370	RGS9	0.1799	0.3845	0.1375	0.5583	0.1375	0.2437	2.0043	1.2658	0.2337	0.7986	1.6252	2.5925	0.681	0.1375
ENSG00000253535	AC120193.1	1.3698	1.9147	1.2451	1.1622	0.1375	0.1375	2.4485	2.2474	0.8223	1.1943	3.3519	2.7562	2.2936	0.1375
ENSG00000108953	YWHAE	5.9985	7.0438	5.5622	5.8084	5.4477	5.3066	6.177	6.8175	7.0925	6.8592	5.9667	6.898	6.685	6.9862
ENSG00000222359	RNU6-355P	0.1375	0.1375	0.4367	0.1375	0.1375	0.1375	0.1375	0.1375	0.1375	0.1375	0.1375	0.1375	0.1375	0.1375
ENSG00000011485	PPP5C	1.7101	2.401	1.6181	1.5807	1.5808	1.6875	3.1658	3.3115	4.595	4.4554	2.256	3.2179	1.5832	1.0864
ENSG00000177990	DPY19L2	0.2311	0.207	0.1375	0.1375	0.1814	0.1375	0.2784	0.2253	2.4827	0.5146	0.1375	0.1375	0.1375	0.1375
ENSG00000201164	RNU4-36P	0.1375	0.1375	0.1375	0.1375	0.1375	0.1375	0.1375	0.1375	0.1375	0.1375	0.1375	0.1375	0.1375	0.1375
ENSG00000166130	IKBIP	2.5692	2.4423	2.7734	2.8534	3.0814	2.7948	2.8369	3.3796	3.3825	2.9635	1.7847	2.2272	2.3798	5.0923
ENSG00000135090	TAOK3	4.9167	5.21	4.8021	5.0541	5.2584	5.18	4.7837	5.5098	4.5709	5.5411	5.6541	5.8592	5.5398	4.2981
ENSG00000258443	AC005225.1	0.1375	0.1375	0.1375	0.1375	0.1375	0.1375	0.1375	0.1375	0.1375	0.1375	0.1375	0.1375	0.1375	0.1375
ENSG00000266036	AC016888.1	0.3578	0.4241	0.1375	0.1375	0.1375	0.1375	1.0956	0.7743	1.1293	0.1375	0.7532	0.8414	0.1375	0.1375
ENSG00000237711	MTCO3P11	1.7498	0.7812	1.6925	1.2356	2.3567	2.2096	2.0821	1.5085	2.2271	2.9046	4.0456	3.9549	1.5398	0.1375
ENSG00000148848	ADAM12	0.4814	0.4268	0.241	0.6258	0.5743	0.4922	0.2733	0.3812	0.235	0.1375	0.3313	0.1909	0.5234	0.1375
ENSG00000279162	AC141586.5	1.9595	2.7476	1.8602	2.0723	1.9977	2.2327	1.2742	1.9286	2.7488	2.0082	1.7798	2.0173	1.5855	2.0919
ENSG00000258957	AL359317.2	0.1375	0.1375	0.1375	0.1375	0.1375	0.1375	0.2339	0.1375	1.308	0.1375	0.1375	0.1375	0.1375	0.1375
ENSG00000284247	MIR2682	0.1375	0.1375	0.1375	0.1375	0.1375	0.1375	0.1677	0.1375	0.1375	0.1375	0.2358	0.7668	0.1375	0.1375
ENSG00000086504	MRPL28	2.2008	2.3916	2.6183	2.7052	3.6378	3.1562	4.53	4.8559	3.0583	3.2649	4.0955	5.1275	4.1525	3.3907
ENSG00000204187	LINC00619	0.1375	0.1375	0.1375	0.1375	0.1375	0.1375	0.1375	0.1375	0.1375	0.1375	0.1375	0.1375	0.1375	0.1375
ENSG00000233098	CCDC144NL-AS1	0.2194	0.2981	0.1975	0.1375	0.2368	0.1375	1.9356	1.3827	2.6783	2.6103	0.1375	0.1375	0.6511	0.1375
ENSG00000225889	AC012368.1	3.8691	4.0458	4.1797	4.3022	4.5432	4.8041	4.6455	6.2301	5.385	4.6543	3.817	4.3813	3.7398	6.0922
ENSG00000011275	RNF216	2.6745	2.746	2.6095	2.3098	2.9537	2.7072	3.8717	4.3197	4.1129	3.4532	3.5396	3.9135	3.844	3.0337
ENSG00000259776	AC093426.1	0.1375	0.1375	0.1375	0.1375	0.1375	0.1375	0.1375	0.1375	0.1375	0.1375	0.1375	0.1375	0.1375	0.1375
ENSG00000233884	AL772337.2	0.1375	0.1375	0.1375	0.1375	0.1375	0.1375	0.1375	0.1375	0.1375	0.1375	0.1375	0.1375	0.1375	0.1375
ENSG00000233262	AL356134.1	0.1375	0.1375	0.1375	0.1375	0.1375	0.1375	0.1375	0.1375	0.1375	0.1375	0.1375	0.1375	0.1375	0.1375
ENSG00000171446	KRT27	0.1375	0.1375	0.1375	0.1375	0.1375	0.1375	0.1375	0.1375	0.1375	0.1375	0.1375	0.1375	0.1375	0.1375
ENSG00000251389	YTHDF1P1	0.1375	0.1375	0.1375	0.1375	0.1375	0.1375	0.1375	0.1375	0.1375	0.1375	0.1375	0.1375	0.1375	0.1375
ENSG00000103150	MLYCD	0.4717	0.5601	0.3104	0.3228	0.466	0.3999	1.33	1.6808	1.0802	1.0103	0.8843	0.9284	1.4098	1.2979
ENSG00000057657	PRDM1	5.46	5.6582	5.045	5.288	3.8646	3.6347	6.5849	6.8551	5.3883	5.5032	6.973	7.4212	4.806	5.0881
ENSG00000110958	PTGES3	4.3943	4.9464	4.3376	4.28	4.8658	4.9016	5.988	6.7007	6.3329	5.9063	5.0638	5.6321	5.8912	4.8668
ENSG00000075213	SEMA3A	0.1706	0.1375	0.1636	0.1489	0.1472	0.1491	1.319	0.5034	2.3658	1.2168	0.44	0.1375	0.2234	0.1375
ENSG00000258598	AL512357.1	0.1375	0.1375	0.1375	0.1375	0.1375	0.1375	0.1375	0.1375	0.1375	0.1375	0.1375	0.1375	0.1375	0.1375
ENSG00000234588	FABP5P14	0.1375	0.1375	0.1375	0.1375	0.1375	0.1375	0.1375	0.1375	0.1375	0.1375	0.1375	0.1375	0.1375	0.1375
ENSG00000121289	CEP89	0.8941	1.2514	0.8256	0.6268	0.9089	0.7075	2.6296	2.7366	4.2577	3.5613	1.9181	2.2981	1.3747	2.0268
ENSG00000137094	DNAJB5	1.9404	3.048	1.6256	1.2554	2.11	2.4641	2.7152	2.311	1.5645	1.7783	3.8113	3.3322	3.1983	1.345
ENSG00000213403	CISD1P1	0.1375	0.1375	0.1375	0.1375	0.1375	0.1375	0.1375	0.1375	0.3891	0.1375	0.1375	0.1375	0.1375	0.1375
ENSG00000146038	DCDC2	0.2017	0.1679	0.1375	0.1375	0.1664	0.1375	1.0881	1.0433	2.6268	1.5175	0.1726	0.2038	0.1375	0.1375
ENSG00000176454	LPCAT4	1.8485	2.5095	2.2084	1.4823	3.0931	3.0815	4.2579	4.3779	3.6704	2.5961	2.4585	3.1734	2.0805	3.0005
ENSG00000254743	OR10V3P	0.1375	0.1375	0.1375	0.1375	0.2583	0.1375	0.3179	0.1375	0.1375	0.1375	0.1375	0.545	0.1375	0.1375
ENSG00000283496	ZNF511-PRAP1	0.1375	0.1375	0.1375	0.1375	0.1375	0.1375	0.4166	0.1375	0.1375	0.1375	0.1375	0.1375	0.1375	0.1375
ENSG00000231237	OR6K1P	0.1375	0.1375	0.1375	0.1375	0.1375	0.1375	0.1375	0.1375	0.1375	0.1375	0.1375	0.1375	0.1375	0.1375
ENSG00000283913	AL512662.2	0.1375	0.1375	0.1375	0.1375	0.1375	0.1375	0.2081	0.1375	0.1375	0.1375	0.1375	0.1375	0.1375	0.1375
ENSG00000250684	ADI1P2	0.1375	0.1375	0.1375	0.1375	0.1375	0.1375	0.1375	0.1375	0.1375	0.1375	0.1375	0.1375	0.1375	0.1375
ENSG00000252400	RNU6-1291P	0.1375	0.1375	0.1375	0.1375	0.1375	0.1375	0.1375	0.1375	0.1375	0.1375	0.1375	0.1375	0.1375	0.1375
ENSG00000181965	NEUROG1	0.1375	0.1375	0.1375	0.1375	0.1375	0.1375	0.1375	0.1375	0.1375	0.1375	0.1375	0.1375	0.1375	0.1375
ENSG00000273846	Metazoa_SRP	0.1375	0.1375	0.1375	0.1375	0.1375	0.1375	0.1375	0.1375	0.1375	0.1375	0.1375	0.1375	0.1375	0.1375
ENSG00000249111	AC108517.1	0.1375	0.1375	0.1375	0.1375	0.1375	0.1375	0.1375	0.1375	0.1375	0.1375	0.1375	0.1375	0.1375	0.1375
ENSG00000268500	AC018755.2	3.5333	4.0306	0.1375	3.5483	3.1298	2.7763	1.0111	0.1375	0.1473	0.1375	1.9024	1.3747	0.9546	0.1375
ENSG00000273600	AP001877.1	0.1375	0.1375	0.1375	0.1375	0.1375	0.1375	0.1375	0.1375	0.1375	0.1375	0.1375	0.1375	0.1375	0.1375
ENSG00000207183	RNU6-843P	0.1375	0.1375	0.1375	0.1375	0.1375	0.1375	0.1375	0.1375	0.1375	0.1375	0.1375	0.1375	0.1375	0.1375
ENSG00000251169	LINC01843	0.7429	0.5066	0.2416	0.5494	0.3673	0.3761	0.1375	0.3762	3.123	2.5567	0.1958	0.4868	0.1375	0.1375
ENSG00000227061	AC079779.1	0.1375	0.1375	0.1375	0.1375	0.1375	0.1375	0.1375	0.1375	0.1375	0.1375	0.1375	0.1375	0.1375	0.1375
ENSG00000182108	DEXI	1.0908	1.3587	0.8932	0.7868	0.6808	0.9627	1.5076	2.0778	2.7979	2.5928	1.8462	1.6893	2.5162	2.8346
ENSG00000199394	RNU6-600P	0.1375	0.1375	0.4375	0.1375	0.1375	0.1375	0.1375	0.1375	0.1375	0.1375	0.1375	0.8717	0.1375	0.1375
ENSG00000163395	IGFN1	0.1441	0.3184	0.1375	0.1684	0.1375	0.1375	0.1375	0.1692	0.1375	0.1375	0.1375	0.1516	0.1375	0.1375
ENSG00000203952	CCDC160	0.249	0.3076	0.1375	0.1375	0.1375	0.1375	1.1227	1.0074	5.5564	4.485	0.1375	0.1375	0.1375	0.1375
ENSG00000007129	CEACAM21	0.8467	1.0249	1.7543	1.4783	1.7637	1.1434	4.1018	4.7285	1.2551	1.3799	2.9621	3.7569	2.0555	1.7436
ENSG00000205976	AC091951.1	0.1375	0.1375	0.1375	0.1375	0.1375	0.1375	0.1375	0.1375	0.1375	0.1375	0.1375	0.1375	0.1375	0.1375
ENSG00000279918	AC006840.1	0.1375	0.1375	0.1375	0.1375	0.1375	0.1375	0.1375	0.1375	0.1375	0.1375	0.1375	0.1375	0.1375	0.1375
ENSG00000127951	FGL2	4.3894	4.2728	4.2885	4.3742	4.8399	4.5574	4.2782	4.9875	3.6375	5.1525	6.8778	6.9593	4.8223	5.3467
ENSG00000178556	CKS1BP6	0.1375	0.1375	0.1375	0.1375	0.1375	0.1375	0.1375	0.1375	0.1375	0.1375	0.1375	0.1375	0.1375	0.1375
ENSG00000118849	RARRES1	0.345	0.5044	0.2697	0.2533	0.1375	0.4061	3.1996	2.5734	3.3612	2.8162	0.2827	0.1375	0.4732	0.1375
ENSG00000236429	GPM6BP2	0.1375	0.1375	0.1375	0.1375	0.1375	0.1375	0.1375	0.1375	0.1375	0.1375	0.1375	0.1375	0.1375	0.1375
ENSG00000105991	HOXA1	0.9941	0.6959	0.2283	0.2699	0.1375	0.1375	0.9852	1.7289	2.4691	1.5568	0.8216	1.2365	0.1375	0.1375
ENSG00000232842	AL137845.2	0.1375	0.1375	0.1375	0.1375	0.2074	0.1375	0.1375	0.1375	0.311	0.1375	0.1375	0.1375	0.1375	0.1375
ENSG00000238417	RNU7-63P	0.1375	0.1375	0.1375	0.1375	0.1375	0.1375	0.1375	0.1375	0.1375	0.1375	0.1375	0.1375	0.1375	0.1375
ENSG00000157168	NRG1	1.3409	0.3723	0.8269	1.3363	0.3498	0.2246	0.1983	0.1587	0.621	1.715	0.8673	0.6252	1.3174	0.8035
ENSG00000258770	LINC02330	0.1375	0.1375	0.1375	0.1375	0.1375	0.1375	0.1375	0.1375	0.1375	0.1375	0.1375	0.1375	0.1375	0.1375
ENSG00000212454	RNA5SP286	0.1375	0.1375	0.1375	0.1375	0.1375	0.1375	0.1375	0.1375	0.1375	0.1375	0.1375	0.1375	0.1375	0.1375
ENSG00000274306	MIR5088	0.1375	0.7227	0.1375	0.1375	0.1375	0.1375	0.4556	1.3462	0.1375	0.1375	0.1375	0.1375	0.1375	0.1375
ENSG00000134057	CCNB1	0.6558	1.1091	0.1375	0.8166	0.8463	0.4047	2.1615	0.8805	2.7291	0.1375	0.9878	1.4697	0.4393	0.1375
ENSG00000280365	AC021766.1	0.3303	0.3192	0.2139	0.3586	0.6963	0.2013	0.9496	0.2993	0.4386	0.1375	0.3745	0.1375	0.1375	0.1375
ENSG00000159182	PRAC1	0.1375	0.1375	0.1375	0.1375	0.1375	0.1375	0.1375	0.1375	0.1375	0.1375	0.1375	0.1375	0.1375	0.1375
ENSG00000247130	AC138781.1	0.1375	0.1375	0.1375	0.1375	0.1375	0.1375	0.1375	0.1375	0.1375	0.1375	0.1375	0.1375	0.1375	0.1375
ENSG00000201683	Y_RNA	0.857	0.7808	0.1375	0.8657	0.6045	0.5141	0.4196	0.4655	1.6312	0.1375	0.3089	0.1375	0.1375	0.1375
ENSG00000156787	TBC1D31	0.7685	0.7489	0.788	0.3965	0.743	0.6837	2.5405	2.2227	3.0138	2.4781	2.38	2.4145	0.5753	0.1375
ENSG00000206262	FOXL2NB	0.1375	0.1375	0.1375	0.1961	0.1375	0.1375	0.1375	0.1375	0.1375	0.1375	0.1375	0.1375	0.1375	0.1375
ENSG00000139998	RAB15	0.344	0.6557	0.3269	0.1969	0.3925	0.5193	1.0777	1.1365	0.7919	0.1375	0.5003	0.6472	0.3736	1.1208
ENSG00000231896	AC019185.2	0.1375	0.1375	0.1375	0.1375	0.1375	0.1375	0.1375	0.1375	0.1375	0.1375	0.1375	0.1375	0.1375	0.1375
ENSG00000235099	AL138731.1	0.1375	0.1375	0.1375	0.1375	0.1375	0.1375	0.1375	0.1375	0.1375	0.1375	0.1375	0.1375	0.1375	0.1375
ENSG00000140836	ZFHX3	1.9583	2.3754	1.4655	1.4509	1.5171	1.3809	1.883	2.6417	3.0105	2.3841	2.0257	2.4348	3.0693	1.3538
ENSG00000278607	AC015819.2	5.945	6.7836	4.8356	5.2846	2.674	3.3506	1.6207	2.5743	2.8619	0.1375	2.3338	3.1789	5.2813	5.4032
ENSG00000237853	NFIA-AS1	0.1375	0.1375	0.1375	0.1375	0.1375	0.1375	0.1375	0.1375	0.6663	0.1375	0.1375	0.1375	0.1375	0.1375
ENSG00000265681	RPL17	5.9751	6.0231	5.3963	5.3385	5.1552	4.8069	6.4099	5.8112	6.8639	7.4299	5.6436	5.9652	7.304	8.6
ENSG00000271811	Z97200.1	0.1375	0.1375	0.1375	0.1375	0.1375	0.1375	0.1375	0.1375	0.1375	0.6182	0.1375	0.1375	0.1375	0.1375
ENSG00000254037	AC021733.2	0.1375	0.1375	0.1375	0.1375	0.1375	0.1375	0.1375	0.1375	0.1375	0.1375	0.1375	0.1375	0.1375	0.1375
ENSG00000016391	CHDH	0.1959	0.2242	0.1829	0.1514	0.1845	0.1808	0.5339	0.8636	0.3333	0.1375	0.1709	0.2142	0.9464	2.1568
ENSG00000252017	RNU6-1194P	0.1375	0.1375	0.1375	0.1375	0.1375	0.1375	0.1375	0.1375	0.1375	0.1375	0.1375	0.1375	0.1375	0.1375
ENSG00000274797	AC008121.3	2.5142	2.1609	1.8203	1.601	0.2399	0.3439	0.1375	0.1375	0.3339	0.1375	0.6211	0.7614	0.1375	0.1375
ENSG00000228411	CDY4P	0.1375	0.1375	0.1375	0.1375	0.1375	0.1375	0.1375	0.1375	0.1375	0.1375	0.1375	0.1375	0.1375	0.1375
ENSG00000189067	LITAF	10.7869	10.7366	10.1116	10.5336	10.5668	10.1999	9.3661	9.7174	10.4421	8.6059	9.0145	9.4245	9.6579	10.4952
ENSG00000278526	ST7-OT3_2	0.1375	0.1375	0.1375	0.4837	0.2149	0.1375	0.442	0.3311	0.1375	0.1375	0.321	1.3498	0.1375	0.1375
ENSG00000172809	RPL38	6.2995	6.3409	5.5972	5.5716	5.4663	5.2193	6.6985	5.9256	6.7458	6.8386	6.7464	6.8243	7.424	7.8093
ENSG00000108960	MMD	0.9976	1.6991	0.8925	1.3588	0.939	0.4811	1.8991	2.1103	2.363	2.0433	2.2611	1.7991	2.9913	0.1375
ENSG00000186231	KLHL32	0.1375	0.1375	0.1375	0.1375	0.1375	0.1375	0.6284	0.2369	2.8741	1.7002	0.1731	0.1375	0.3243	0.1375
ENSG00000176349	AC104129.1	0.1375	0.1375	0.1375	0.1612	0.1375	0.1375	0.1709	0.1375	0.1375	0.1375	0.1375	0.1375	0.1375	0.1375
ENSG00000226376	AL135923.1	0.1375	0.1375	0.1375	0.1375	0.1375	0.1375	0.1375	0.1375	0.1375	0.1375	0.1375	0.1375	0.1375	0.1375
ENSG00000232110	AL353751.1	0.1375	0.1375	0.1375	0.1375	0.1375	0.1375	1.0834	0.1375	0.1375	0.1375	0.6658	0.1375	0.1375	0.1375
ENSG00000115839	RAB3GAP1	2.8383	3.3105	3.0683	2.6761	3.2993	3.022	3.6877	3.9167	4.0249	4.0301	4.1475	4.4894	3.4031	2.8584
ENSG00000212429	RNU11-6P	0.1375	0.1375	0.1375	0.1375	0.1375	0.1375	0.7438	0.5402	0.1375	0.1375	0.1375	0.1375	0.1375	0.1375
ENSG00000136811	ODF2	2.2535	2.8462	1.5934	1.5945	2.162	2.3251	3.8262	4.5419	4.0137	3.3516	3.0725	3.7968	2.3229	3.3857
ENSG00000150764	DIXDC1	1.1533	2.132	0.6893	1.5234	0.44	0.435	2.3487	3.0346	6.2032	5.37	1.0891	1.3308	1.3835	1.8248
ENSG00000140941	MAP1LC3B	7.3507	7.4101	6.8658	6.9202	6.3254	6.1258	5.133	5.8938	6.9901	6.3341	5.8844	6.2406	6.4991	6.2371
ENSG00000215156	AC138409.1	0.1375	0.1375	0.1375	0.1375	0.1898	0.2097	0.1375	0.2059	0.1375	0.1375	0.1375	0.1375	0.1375	0.1375
ENSG00000240270	RPL12P37	0.2448	0.1375	0.1375	0.1375	0.1375	0.1375	0.4524	0.1375	0.1375	0.1375	0.1375	0.4513	0.1375	0.1375
ENSG00000258550	OR7E106P	0.1375	0.1375	0.2357	0.1375	0.1375	0.1375	0.1375	0.1375	0.1375	0.1375	0.1375	0.1375	0.1375	0.1375
ENSG00000159788	RGS12	2.0787	2.6202	2.0592	2.5672	2.6243	2.214	3.4784	4.5595	4.3687	4.6401	3.5257	4.0725	4.9975	1.8669
ENSG00000160410	SHKBP1	6.2324	7.2574	6.6296	6.7215	8.4933	8.9767	6.3984	7.643	6.8168	6.5341	6.842	7.3918	6.476	7.7236
ENSG00000272160	RNU4-5P	0.1375	0.1375	0.1375	0.1375	0.1375	0.1375	0.1375	0.1375	0.1375	0.1375	0.1375	0.1375	0.1375	0.1375
ENSG00000259507	AC103968.1	0.1375	0.1375	0.1375	0.1375	0.1375	0.1375	0.1375	0.1375	0.1375	0.1375	0.1375	0.1375	0.1375	0.1375
ENSG00000271375	AC134879.2	0.1375	0.1375	0.1375	0.1375	0.1375	0.1375	0.1375	0.1375	0.1375	0.1375	0.1375	0.1375	0.1375	0.1375
ENSG00000272689	AC004832.4	0.1375	0.3382	0.1375	0.4262	0.3885	0.3987	0.3096	0.9706	0.5985	1.2679	0.5483	0.1375	1.4852	0.1375
ENSG00000160396	HIPK4	0.2235	0.1938	0.169	0.3005	0.1375	0.214	0.4784	0.2138	0.2086	0.1375	0.1913	0.1375	0.1375	0.1375
ENSG00000207714	MIR584	0.1375	0.1375	0.1375	0.1375	0.1375	0.1375	0.1375	0.1375	0.1375	0.1375	0.5195	0.1375	0.1375	0.1375
ENSG00000274049	INO80B-WBP1	0.1375	0.1375	0.1375	0.1375	0.1375	0.1375	0.1375	0.1375	0.1375	0.1375	0.1375	0.1375	0.1375	2.1144
ENSG00000072571	HMMR	0.2515	0.3064	0.1375	0.2691	0.264	0.1375	0.8437	0.4514	0.6681	0.8539	0.3961	0.2956	0.5475	0.1375
ENSG00000278580	AL162373.1	0.1375	0.1375	0.1375	0.1375	0.1375	0.1375	0.1375	0.1375	0.1375	0.1375	0.1375	0.1375	0.1375	0.1375
ENSG00000114646	CSPG5	0.4092	0.4128	0.2718	0.4625	0.2508	0.1719	0.348	0.3544	0.4124	0.3921	0.1691	0.2566	0.4527	0.1375
ENSG00000160752	FDPS	2.9611	3.0787	2.9286	2.6687	3.3036	3.3422	4.4021	4.8448	4.8873	4.7687	3.2477	3.9517	4.4387	5.5325
ENSG00000232413	AL589923.1	0.1375	0.1375	0.1375	0.1375	0.1375	0.1375	0.1375	0.1375	0.1375	0.1375	0.1375	0.1375	0.1375	0.1375
ENSG00000133028	SCO1	0.7983	0.9645	0.7153	0.681	1.386	0.9462	2.0396	1.5222	2.3359	3.3581	1.9221	2.2623	2.8635	0.8849
ENSG00000222616	RN7SKP27	0.1375	0.1375	0.1375	0.1375	0.1375	0.1375	0.1375	0.1375	0.1375	0.1375	0.1375	0.1375	0.1375	0.1375
ENSG00000269220	LINC00528	5.85	6.5209	6.8704	6.7963	3.6326	4.0982	5.9754	7.1127	5.4913	3.9983	4.9037	5.4859	4.823	5.4999
ENSG00000242797	GLYCTK-AS1	0.1375	0.3916	0.1375	0.1375	0.1892	0.2607	0.3236	0.1375	0.261	0.8339	0.2381	0.3465	0.1375	0.1375
ENSG00000236483	MTND2P40	0.1375	0.1375	0.1375	0.1375	0.1375	0.1375	0.1375	0.1375	0.1375	0.1375	0.1375	0.1375	0.1375	0.1375
ENSG00000275882	IKBKGP1	0.1375	0.4947	0.1375	0.1375	0.3731	0.1375	0.4345	0.6878	0.1375	0.1375	0.2895	0.1375	0.1375	0.1375
ENSG00000269125	AL137002.1	0.1375	0.1375	0.1375	0.1375	0.1375	0.1375	0.1375	0.1375	0.1375	0.1375	0.1375	0.1375	0.1375	0.1375
ENSG00000071189	SNX13	3.7745	3.8648	3.5205	3.8198	3.8742	4.0762	3.6969	3.1842	4.479	2.6017	3.53	3.9758	4.2448	1.7786
ENSG00000234061	AC007969.2	0.1375	0.1375	0.1375	0.1375	0.1375	0.1375	0.1375	0.1375	0.1375	0.1375	0.1375	0.1375	0.1375	0.1375
ENSG00000254163	AC025434.1	0.1375	0.1375	0.1375	0.1375	0.1375	0.1375	0.1375	0.1375	0.1375	0.1375	0.1375	0.1375	0.1375	0.1375
ENSG00000244682	FCGR2C	4.077	4.0484	4.426	4.4171	4.1459	4.8495	4.8961	5.5792	4.62	5.1277	5.3157	6.1335	3.3202	3.8409
ENSG00000196472	AC111000.1	0.1375	0.1375	0.2881	0.3453	0.1375	0.1375	0.2622	0.1375	0.1375	0.1375	0.1375	0.1375	0.1375	0.1375
ENSG00000264101	MIR4689	0.1375	0.8676	0.2569	0.3782	0.1375	0.1375	0.1375	0.9262	0.1375	0.1375	0.7463	1.0839	0.1375	0.1375
ENSG00000166024	R3HCC1L	2.6885	2.6842	2.0244	2.4185	2.6313	2.8363	3.2718	2.9181	4.1151	3.1422	3.1036	3.0846	3.0725	2.1514
ENSG00000164266	SPINK1	6.8763	7.7851	4.3112	4.7332	1.483	2.1912	2.023	1.7432	2.9403	0.1375	3.1056	2.0585	4.875	4.6481
ENSG00000106268	NUDT1	1.4581	1.7406	1.4885	1.8984	1.6274	1.186	3	4.0047	1.4144	3.1631	3.025	3.4853	3.4975	0.1375
ENSG00000235217	TSPY26P	2.2382	2.2131	2.875	3.349	1.4202	1.5681	2.4691	3.5983	2.6092	1.9195	2.3143	2.647	0.8327	1.9175
ENSG00000283663	AC008687.8	0.1375	0.1375	0.1375	0.1375	0.1375	0.1375	0.1375	0.4739	0.1375	0.1375	0.1375	0.1375	0.1375	0.1375
ENSG00000272918	AC005070.3	1.3303	1.4059	1.2073	1.2939	1.2268	0.956	0.8232	1.5226	1.0804	0.1375	0.8219	1.1417	0.9003	2.2187
ENSG00000099954	CECR2	0.1537	0.1671	0.1375	0.1703	0.1375	0.1375	0.1752	0.1999	0.156	0.1375	0.1744	0.1835	0.3496	0.1375
ENSG00000233021	AL669841.1	0.1375	0.1375	0.1375	0.1375	0.1375	0.1375	0.1375	0.1375	0.1375	0.1375	0.1375	0.1375	0.1375	0.1375
ENSG00000224664	RPL36AP53	0.1375	0.1375	0.1375	0.1375	0.1375	0.1375	0.1375	0.1375	0.1375	0.1375	0.1375	0.1375	0.1375	0.1375
ENSG00000165288	BRWD3	3.8494	3.9524	4.1725	4.3671	4.2658	4.1379	3.2154	3.4701	3.8352	2.9404	3.9486	3.8905	3.5115	3.861
ENSG00000225675	LINC01771	0.1375	0.1375	0.1375	0.1375	0.1375	0.1375	0.1375	0.1375	0.1375	0.1375	0.1375	0.1375	0.1375	0.1375
ENSG00000255458	AC108471.2	1.2192	1.5031	0.4565	0.1375	0.1375	0.1375	0.8658	0.6193	1.2349	0.1375	1.9224	2.0385	1.8194	0.1375
ENSG00000215177	IGLV8OR8-1	0.1375	0.1375	0.1375	0.1375	0.1375	0.1375	0.1375	0.1375	0.1375	0.1375	0.1375	0.1375	0.1375	0.1375
ENSG00000158691	ZSCAN12	0.1867	0.189	0.2998	0.2299	0.2761	0.1375	1.1572	0.8791	1.6312	1.2722	0.5728	0.7623	0.5906	0.1375
ENSG00000270500	COX6CP4	0.1375	0.1375	0.1375	0.1375	0.1375	0.1375	0.1375	0.1375	0.1375	0.1375	0.1375	0.1375	0.1375	0.1375
ENSG00000280432	AP000962.2	0.1375	0.1375	0.1375	0.1375	0.1375	0.1375	0.1375	0.1375	0.1375	0.1375	0.1375	0.1375	0.1375	0.1375
ENSG00000263400	TMEM220-AS1	0.2594	0.1375	0.1375	0.1375	0.1375	0.1375	0.5223	0.5832	0.9451	0.1375	0.3918	0.8937	0.1375	0.1375
ENSG00000248424	OR51K1P	0.1375	0.1375	0.1375	0.1375	0.1375	0.1375	0.185	0.2261	0.5916	0.1375	0.2065	0.1375	0.1375	0.1375
ENSG00000172031	EPHX4	0.1375	0.1375	0.1375	0.1375	0.1375	0.1375	0.1375	0.2581	0.1375	0.1375	0.1375	0.1375	0.1375	0.1375
ENSG00000135914	HTR2B	0.2705	0.5958	0.1375	0.5004	0.1375	0.1375	1.0133	0.6108	2.0282	1.5244	0.1375	0.1375	0.6774	0.1375
ENSG00000200443	RNU6-1066P	0.1375	0.1375	0.1375	0.1375	0.1375	0.1375	0.1375	0.1375	0.1375	0.1375	0.1375	0.1375	0.1375	0.1375
ENSG00000255295	AP002404.1	0.1375	0.1375	0.1375	0.1375	0.1375	0.1375	0.1375	0.1375	0.1375	0.1375	0.1375	0.1375	0.1375	0.1375
ENSG00000206958	SNORA70	0.1375	0.1375	0.1375	0.1375	0.1375	0.1375	0.1375	0.1375	0.1375	0.1375	0.1375	0.1375	0.1375	0.1375
ENSG00000227599	AL031676.1	0.1375	0.1375	0.1375	0.1375	0.1375	0.1375	0.1375	0.1375	0.1375	0.1375	0.1375	0.1375	0.1375	0.1375
ENSG00000105185	PDCD5	2.0932	2.2112	1.6662	1.7997	2.2092	1.5586	3.4272	3.9551	4.5587	3.0171	2.9731	2.3226	3.4365	3.1082
ENSG00000005243	COPZ2	0.22	0.5468	0.1375	0.2507	0.4854	0.2617	1.3391	1.2847	0.9133	0.1375	0.6797	1.3179	0.1375	3.1866
ENSG00000236432	AC097662.1	0.1375	0.1375	0.1375	0.1375	0.1726	0.2366	0.1375	0.1861	0.6964	0.8384	0.1375	0.1375	0.1375	0.1375
ENSG00000248540	AC010931.2	0.1564	0.1375	0.1752	0.1375	0.1607	0.1674	0.1471	0.1803	0.1375	0.1375	0.1375	0.1375	0.1375	0.1375
ENSG00000283920	MIR6743	0.304	0.4319	0.4169	0.3464	0.3131	0.2424	0.2302	0.3794	0.2457	1.2926	0.2581	0.5061	0.1601	0.1375
ENSG00000229086	LINC01548	0.1375	0.1375	0.1375	0.1375	0.1375	0.2384	0.1375	0.1375	0.1375	0.1375	0.1375	0.1375	0.1375	0.1375
ENSG00000260166	AC134312.3	1.451	1.7259	0.1375	1.3284	0.1375	0.1375	0.911	1.7091	0.1375	0.1375	1.1541	1.6921	0.1375	0.1375
ENSG00000283206	MIR941-1	2.3877	3.8428	0.1375	0.1375	4.6071	2.9167	3.2942	3.8802	2.6212	0.9046	2.7785	4.1188	1.0543	4.2564
ENSG00000253726	AC013562.1	0.1375	0.1375	0.1375	0.1375	0.1375	0.1375	0.1375	0.1375	0.1375	0.1375	0.1375	0.1375	0.1375	0.1375
ENSG00000233232	NPIPB7	0.1792	0.2348	0.1375	0.1375	0.2215	0.1375	0.2675	0.277	0.1375	0.1375	0.1375	1.0763	0.1375	0.1375
ENSG00000261289	AC034105.5	0.2582	0.1375	0.3468	0.4385	0.1375	0.1375	0.1375	0.1375	0.4018	0.1375	0.1914	0.5573	0.5743	0.1375
ENSG00000261835	AC007610.3	0.1375	0.1375	0.1375	0.1375	0.1375	0.1375	0.1375	0.1375	0.1375	0.1375	0.1375	0.1375	0.1375	0.1375
ENSG00000277194	SNORD22	4.8075	2.8013	4.6739	5.5331	5.4362	5.1295	3.5041	5.3678	3.9491	5.9082	2.7154	5.2863	3.3983	6.0221
ENSG00000267685	NTF6B	0.1375	0.1375	0.1375	0.1375	0.1375	0.1375	0.1375	0.1375	0.1375	0.1375	0.4132	0.1375	0.1375	0.1375
ENSG00000236254	MTND4P14	1.2958	0.8646	1.1932	0.9575	1.7729	1.403	1.5087	0.8529	1.3692	2.0459	3.4444	3.0466	1.3467	2.7216
ENSG00000271710	NDUFA8P1	0.1375	0.1375	0.1375	0.1375	0.1375	0.1375	0.1375	0.1375	0.1375	0.1375	0.1375	0.1375	0.1375	0.1375
ENSG00000160182	TFF1	0.998	0.8081	0.1375	0.1375	0.2954	0.1375	3.3916	0.9491	0.1375	0.1375	0.1375	0.1375	0.1375	4.33
ENSG00000243730	RPL29P3	0.1375	0.1375	0.1375	0.1375	0.1375	0.1375	0.1375	0.1375	0.1375	0.1375	0.1375	0.1375	0.1375	0.1375
ENSG00000280263	ACTR3BP2	0.1375	0.1375	0.1375	0.1375	0.1375	0.1375	0.1375	0.1375	0.1375	0.1375	0.1375	0.1375	0.1375	0.1375
ENSG00000249950	AC010587.2	0.1375	0.1375	0.1375	0.1375	0.1375	0.1375	0.1375	0.1375	0.1375	0.1375	0.1375	0.1375	0.1375	0.1375
ENSG00000207646	MIR655	0.1375	0.1375	0.1375	0.1375	0.1375	0.1375	0.1375	0.1375	0.1375	0.1375	0.1375	0.1375	0.1375	0.1375
ENSG00000276556	AF254982.1	0.1375	0.1375	0.1375	0.1375	0.1375	0.1375	0.1375	0.1375	0.1375	0.1375	0.1375	0.1375	0.1375	0.1375
ENSG00000226967	HAUS4P1	0.1375	0.1375	0.1375	0.1375	0.1375	0.1375	0.1375	0.1375	0.1375	0.1375	0.1375	0.1375	0.1375	0.1375
ENSG00000229854	AL357936.1	0.1375	0.1375	0.1375	0.1375	0.1375	0.1375	0.1375	0.1375	0.1375	0.1375	0.1375	0.1375	0.1375	0.1375
ENSG00000254442	AP000859.1	0.1375	0.1375	0.1375	0.1375	0.1375	0.1375	0.1375	0.1375	0.1375	0.1375	0.1375	0.1375	0.1375	0.1375
ENSG00000081760	AACS	1.7902	2.3277	1.2696	0.715	1.3933	1.6677	3.1191	2.827	2.7858	2.7823	3.1707	3.7447	1.3029	4.4294
ENSG00000231812	SNRPCP9	0.1375	0.1375	0.1375	0.4461	0.5269	0.1375	0.1375	0.1375	0.1375	0.1375	0.1375	0.1375	0.1375	0.1375
ENSG00000275146	snoU2_19	0.4889	0.7128	0.6385	0.608	0.5296	0.5482	0.5343	0.5987	0.8482	1.7153	0.4365	0.7099	1.926	0.1375
ENSG00000277739	RNA5-8SN5	0.1375	0.1375	0.1375	0.2987	0.1375	0.1375	0.1375	0.1375	0.1375	0.1375	0.1375	0.1375	0.1375	0.1375
ENSG00000069998	HDHD5	1.3265	2.0453	2.2136	1.3732	2.0999	2.0387	3.0791	3.4553	1.7946	2.1745	1.8711	3.0337	2.6408	2.1307
ENSG00000185619	PCGF3	3.1893	3.83	3.6868	3.4673	4.1612	4.5156	5.2832	5.7627	4.2874	4.8961	4.6415	5.4519	4.2927	4.8409
ENSG00000275392	AL445493.3	0.1375	0.1375	0.1375	0.1375	0.1375	0.1375	0.1375	0.1375	0.1375	0.1375	0.1375	0.1375	0.1375	0.1375
ENSG00000215589	KANK1P1	0.254	0.1375	0.1375	0.1375	0.1375	0.1375	0.1375	0.1375	0.1375	0.1375	0.2414	0.1375	0.1375	0.1375
ENSG00000211956	IGHV4-34	0.4433	0.3716	0.1375	0.1375	0.1375	0.1375	0.9166	0.7655	0.1375	0.1375	0.9223	1.6712	3.5871	0.1375
ENSG00000114670	NEK11	0.5249	0.8522	0.6986	0.6441	0.5011	0.3785	3.241	2.599	5.3362	4.5196	1.0383	1.1489	0.1375	0.1375
ENSG00000250032	AC008869.1	0.1375	0.1375	0.1375	0.1375	0.1375	0.1375	0.1375	0.1375	0.1375	0.1375	0.1375	0.1375	0.1375	0.1375
ENSG00000105373	NOP53	4.6563	5.4577	3.9079	4.0073	3.7746	3.5831	5.9244	6.5638	4.8454	6.2185	5.0709	5.9121	6.5198	8.7032
ENSG00000140470	ADAMTS17	1.1641	2.2259	1.1926	0.4323	0.6059	0.3929	1.0327	0.7214	0.7515	0.4323	0.563	0.7482	0.1375	0.7762
ENSG00000135698	MPHOSPH6	2.3686	3.0257	2.9304	2.6642	2.0623	1.6817	2.7989	2.7098	3.6466	3.6756	3.3008	3.8869	4.5545	4.3988
ENSG00000267727	AC008738.5	0.1375	0.1375	0.1375	0.1375	0.1375	0.1375	0.4457	0.1375	0.1375	0.1375	0.1375	0.8942	0.1375	0.1375
ENSG00000235145	RPSAP16	1.1401	0.9989	0.9014	0.6274	1.1088	1.2334	1.9832	1.8967	0.9109	1.1218	1.5073	2.144	0.5242	0.1375
ENSG00000166530	HSBP1P2	0.1375	0.1375	0.1375	0.1375	0.1375	0.1375	0.1375	0.1375	0.1375	0.1375	0.1375	0.1375	0.1375	0.1375
ENSG00000253088	Y_RNA	0.1375	0.1375	0.1375	0.1375	0.1375	0.1375	0.1375	0.1375	0.1375	0.1375	0.1375	0.1375	0.1375	0.1375
ENSG00000250026	TMPRSS11BNL	0.1375	0.1375	0.1375	0.1375	0.1375	0.1375	0.5084	0.1375	0.1375	0.1375	0.1375	0.1375	0.1375	0.1375
ENSG00000130487	KLHDC7B	0.5203	0.7285	0.5188	0.481	1.1509	0.6748	5.5879	5.9386	4.3013	2.4105	3.5152	4.2014	0.8874	0.799
ENSG00000109576	AADAT	0.1375	0.1375	0.1375	0.1375	0.1375	0.1375	0.2334	0.1375	1.3664	0.1375	0.1808	0.1375	0.1375	0.1375
ENSG00000234660	LINC00440	0.1375	0.1375	0.1375	0.1375	0.1375	0.1375	0.1375	0.1375	0.1375	0.1375	0.1375	0.1375	0.1375	0.1375
ENSG00000165801	ARHGEF40	7.7472	8.6463	6.1922	6.073	7.3564	7.7588	4.568	6.0699	5.3579	4.4868	5.7659	6.7851	5.8162	6.6255
ENSG00000184811	TUSC5	0.1375	0.1375	0.1375	0.1375	0.1375	0.1375	0.1375	0.1375	0.1375	0.1375	0.1561	0.1375	0.1375	0.1375
ENSG00000267187	AC026898.1	0.1375	0.1375	0.1375	0.1375	0.1375	0.1375	0.1375	0.1375	0.1375	0.1375	0.1375	0.1375	0.1375	0.1375
ENSG00000270993	AC111186.1	0.2039	0.1375	0.1375	0.1375	0.1788	0.1375	0.1375	0.1375	0.1375	0.1375	0.1375	0.1375	0.1375	0.1375
ENSG00000227964	LINC01429	0.1375	0.1375	0.1375	0.1375	0.1375	0.1375	0.1375	0.1375	0.1375	0.1375	0.1375	0.1375	0.1375	0.1375
ENSG00000266227	NPM1P2	0.1375	0.1375	0.1375	0.1375	0.1375	0.1375	0.1375	0.1375	0.1375	0.1375	0.1375	0.1375	0.1375	0.1375
ENSG00000229190	AC069542.1	0.1375	0.1375	0.1375	0.1375	0.1375	0.1375	0.1375	0.1375	0.1375	0.1375	0.1375	0.1375	0.1375	0.1375
ENSG00000269787	OR7A3P	0.1375	0.1375	0.1375	0.1375	0.1375	0.1375	0.1375	0.1375	0.1375	0.1375	0.1375	0.1375	0.1375	0.1375
ENSG00000198934	MAGEE1	0.2213	0.2478	0.17	0.25	0.2111	0.2149	0.4759	0.3329	0.1862	0.1375	0.3584	0.5711	0.1375	1.4194
ENSG00000253895	IGHVII-44-2	0.1375	0.1375	0.1375	0.1375	0.1375	0.1375	0.1375	0.1375	0.1375	0.1375	0.1375	0.1375	0.1375	0.1375
ENSG00000225943	AC016907.1	0.1375	0.1375	0.1375	0.1375	0.1375	0.1375	0.1375	0.1375	0.1375	0.1375	0.1375	0.1375	0.1375	0.1375
ENSG00000087448	KLHL42	0.6626	1.0097	0.4179	0.3552	0.9279	0.8095	1.6652	1.3469	1.2171	1.1059	1.4151	1.7687	1.1486	1.4482
ENSG00000239555	RN7SL841P	0.1375	0.1375	0.1375	0.1375	0.1375	0.1375	0.1375	0.1375	0.1375	0.1375	0.1375	0.1375	0.1375	0.1375
ENSG00000225398	PGM5P4	0.1375	0.1375	0.1375	0.1375	0.1375	0.1375	0.1375	0.1375	0.476	0.1375	0.1375	0.1375	0.1375	0.1375
ENSG00000182718	ANXA2	6.9727	7.3436	6.1248	6.3885	6.8439	6.4683	8.3495	8.2804	8.8246	9.2682	8.7764	9.0066	8.9442	7.654
ENSG00000166847	DCTN5	1.4515	1.7172	0.8892	1.4888	1.8685	1.7203	2.449	2.5033	2.4583	2.1344	2.3896	3.355	2.8065	2.3831
ENSG00000196098	OR5K4	0.1375	0.1375	0.1375	0.1375	0.1375	0.1375	0.1375	0.1375	0.1375	0.1375	0.1375	0.1375	0.1375	0.1375
ENSG00000254566	AC087277.1	0.1375	0.1375	0.1375	0.1375	0.1375	0.1375	0.1375	0.1375	0.1375	0.1375	0.1375	0.1375	0.1375	0.1375
ENSG00000117009	KMO	2.7482	2.8779	3.2356	3.4265	1.4745	0.9701	1.7434	2.1742	2.1192	3.2674	3.2956	2.8927	3.2906	0.5402
ENSG00000177553	AL953897.1	0.2847	0.6685	0.1375	0.2472	0.1375	0.1375	0.4936	0.2043	0.7184	0.1375	0.7879	0.6658	0.1375	0.1375
ENSG00000198466	ZNF587	2.4114	3.1044	2.5941	2.709	3.5327	3.521	3.3073	3.8999	4.9868	4.4409	2.6343	3.5624	2.9902	3.9326
ENSG00000237687	LINC00686	0.1375	1.0107	0.1375	0.1375	0.1375	0.1375	0.1375	0.1375	0.1375	0.1375	0.1375	0.1375	0.1375	0.1375
ENSG00000242985	RN7SL50P	0.1375	0.1375	0.1375	0.1375	0.1375	0.1375	0.1375	0.1375	0.1375	0.1375	0.1375	0.1375	0.1375	0.1375
ENSG00000256070	AC016956.1	0.1375	0.1375	0.1375	0.1375	0.1375	0.1375	0.1375	0.1375	0.1375	0.1375	0.1375	0.1375	0.1375	0.1375
ENSG00000260391	AC022336.2	0.1375	0.1375	0.1375	0.1375	0.1375	0.1375	0.2235	0.186	0.3243	1.0708	0.1375	0.1375	0.1375	0.1375
ENSG00000224401	RPL7P57	0.1375	0.1375	0.1375	0.1375	0.237	0.1375	0.1375	0.1375	0.1375	0.1375	0.1375	0.1375	0.1375	0.1375
ENSG00000207365	Y_RNA	0.1375	0.1375	0.1375	0.1375	0.1375	0.1375	0.1375	0.1375	0.1375	0.1375	0.1375	0.1375	0.1375	0.1375
ENSG00000133706	LARS	2.47	2.4785	2.9557	2.2078	2.7076	2.1962	2.9254	3.6274	4.2017	4.3584	2.5244	1.7481	4.2504	2.3475
ENSG00000232948	DEFB130A	0.1375	0.1375	0.1375	0.1375	0.1375	0.1375	0.1375	0.1375	0.1375	0.1375	0.1375	0.1375	0.1375	0.1375
ENSG00000159871	LYPD5	0.1753	0.1375	0.1375	0.1375	0.2093	0.2489	1.1294	0.6061	2.6126	2.5397	0.5189	0.9517	0.1375	0.1375
ENSG00000178234	GALNT11	3.8805	4.1571	3.5155	3.7658	2.3675	2.7823	3.8082	4.2499	4.8423	4.5813	4.151	4.7653	4.5305	3.7551
ENSG00000227722	AL022100.1	0.1385	0.17	0.252	0.1821	0.1375	0.1375	0.1375	0.1375	0.2137	0.1375	0.3376	0.3653	0.1375	0.1375
ENSG00000237990	CNTN4-AS1	0.1375	0.1375	0.1375	0.1375	0.1375	0.1375	0.5539	1.3121	3.1531	1.0868	0.1375	0.1375	0.1375	0.1375
ENSG00000135045	C9orf40	0.9204	1.1966	0.5714	0.5373	2.8251	2.7859	1.4504	1.8759	1.1942	1.3861	0.6555	0.4684	1.3408	0.1375
ENSG00000204248	COL11A2	0.3303	0.4612	0.2999	0.2781	0.8304	0.9966	0.4451	0.3969	0.297	0.1375	0.4235	0.3269	0.1375	0.1375
ENSG00000259090	SEPT7P1	0.1375	0.1375	0.1375	0.1375	0.1375	0.1375	0.1375	0.1896	0.1375	0.1375	0.2769	0.2074	0.1375	0.1375
ENSG00000223694	ADH5P3	0.1375	0.1375	0.1375	0.1375	0.1375	0.1375	0.1375	0.1375	0.1375	0.1375	0.1375	0.1375	0.1375	0.1375
ENSG00000280670	CCDC163	0.566	0.4784	0.1375	0.175	0.2547	0.1375	0.7879	0.9295	1.0416	0.8434	0.3392	0.3982	0.5495	0.1375
ENSG00000132164	SLC6A11	0.1375	0.1375	0.1375	0.1375	0.1375	0.1375	0.1375	0.1375	0.1375	0.1375	0.1375	0.1375	0.1375	0.1375
ENSG00000179886	TIGD5	0.3716	0.9328	0.3424	0.2926	0.4547	0.4134	0.9607	1.3236	0.9583	0.51	0.4756	0.831	1.0198	1.3323
ENSG00000185634	SHC4	0.1655	0.1375	0.1375	0.1375	0.1375	0.1375	0.7687	0.2951	0.4491	0.1375	0.1611	0.1375	0.1375	0.1375
ENSG00000200566	RNU5F-7P	0.4457	0.1375	0.1375	0.1375	0.1375	0.1375	0.1375	0.1375	0.1375	0.1375	0.1375	0.1375	0.1375	0.1375
ENSG00000038210	PI4K2B	1.7771	2.1576	2.0282	1.7872	1.2817	1.3551	4.6274	4.6237	4.0389	4.1205	5.2342	5.4115	2.9947	3.6954
ENSG00000258116	PPIAP45	0.1375	0.3677	0.1375	0.1375	0.1375	0.1375	0.2498	0.1375	0.1375	0.1375	0.1375	0.1375	0.1375	0.1375
ENSG00000234570	ZFRP1	0.1375	0.1375	0.1375	0.1375	0.1375	0.1375	0.1375	0.1375	0.1375	0.1375	0.1375	0.1375	0.1375	0.1375
ENSG00000226054	MEMO1P1	0.205	0.1911	0.2032	0.1375	0.2177	0.1375	0.3025	0.2072	0.5583	0.1375	0.3572	0.1375	0.1375	0.1375
ENSG00000166930	MS4A5	0.1375	0.1375	0.1375	0.1375	0.1375	0.1375	0.1375	0.1375	0.1375	0.1375	0.2475	0.3377	0.1375	0.1375
ENSG00000197451	HNRNPAB	3.881	4.5697	3.7763	3.6605	3.6375	3.2345	4.9734	5.6419	4.4394	5.4383	4.5233	5.0951	5.4422	5.5049
ENSG00000248092	NNT-AS1	0.32	0.9979	0.3338	0.417	0.2941	0.3084	1.5004	1.4574	1.7727	2.1517	0.4457	0.9281	0.8975	0.5862
ENSG00000278928	AC136621.1	0.1375	0.1375	0.1375	0.1375	0.1375	0.1375	0.1375	0.1375	0.1375	0.1375	0.1375	0.1375	0.1375	0.1375
ENSG00000224605	AL080284.1	0.1375	0.1375	0.1375	0.1375	0.1375	0.1375	0.1375	0.1375	0.1375	0.1375	0.1375	0.1375	0.1375	0.1375
ENSG00000188549	C15orf52	1.3249	0.5817	0.2148	0.2386	0.5181	0.4642	1.4133	2.4857	1.3643	1.3138	0.264	0.9431	1.3277	2.3298
ENSG00000279336	AL353662.3	0.3519	1.2268	1.0661	0.3825	1.0809	0.9827	0.1375	1.3167	0.5055	0.1375	0.9817	0.7177	0.1375	2.9606
ENSG00000184060	ADAP2	1.7775	2.5117	2.1098	1.8749	3.3911	3.014	4.6682	5.7697	2.8148	2.5391	5.1503	5.7697	2.9922	2.0495
ENSG00000255433	AP001803.2	0.1375	0.1375	0.1375	0.1375	0.1375	0.1375	0.1375	0.1375	0.1375	0.1375	0.1375	0.1375	0.1375	0.1375
ENSG00000271381	REXO1L9P	0.1375	0.1375	0.1375	0.1375	0.1375	0.1375	0.1375	0.1375	0.1375	0.1375	0.1375	0.1375	0.1375	0.1375
ENSG00000241478	HSPA8P9	0.1375	0.1375	0.1375	0.1375	0.1375	0.1375	0.1375	0.1375	0.1375	0.1375	0.1375	0.1375	0.1375	0.1375
ENSG00000254593	OR7E126P	0.1375	0.1375	0.1375	0.1375	0.1375	0.1375	0.1375	0.3951	0.6482	0.1375	0.1375	0.3162	0.1375	0.1375
ENSG00000232920	LINC01400	0.1375	0.1375	0.1375	0.1375	0.1375	0.1375	0.1375	0.1375	0.1375	0.1375	0.1375	0.1375	0.1375	0.1375
ENSG00000224733	AL034349.1	0.1375	0.1375	0.1375	0.1375	0.1375	0.1375	0.1375	0.1375	0.1375	0.1375	0.1375	0.1375	0.1375	0.1375
ENSG00000226744	AC005326.1	0.1375	0.1375	0.1375	0.1375	0.1375	0.1375	0.1375	0.1375	0.1375	0.1375	0.1375	0.1375	0.1375	0.1375
ENSG00000176945	MUC20	1.4416	1.7309	0.2716	1.0345	0.5484	0.8797	4.6721	4.3123	5.4368	5.3415	1.476	1.2419	2.1664	3.8732
ENSG00000227815	AL359265.1	0.1375	0.1375	0.3575	0.1375	0.3013	0.1375	0.1375	0.1375	0.1375	0.1375	0.1375	0.1375	0.1375	0.1375
ENSG00000273171	AC002094.3	0.1375	0.1375	0.1375	0.1375	0.1375	0.1375	0.1375	0.1375	0.1375	0.1375	0.1375	0.1375	0.1375	0.1375
ENSG00000266144	MIR4654	0.2869	0.1987	0.1375	0.1375	0.1375	0.6645	0.2607	0.1375	0.1375	0.1375	0.1375	0.1375	0.1375	0.1375
ENSG00000125971	DYNLRB1	4.9132	5.3365	4.5407	4.5473	5.2697	4.9932	6.6084	6.823	6.0231	5.8685	6.4411	6.6784	6.0133	6.7562
ENSG00000169194	IL13	0.1978	0.2295	0.1375	0.1375	0.1375	0.1375	0.1375	0.1375	0.1375	0.1375	0.3052	0.1375	0.1375	0.1375
ENSG00000215223	CYP51A1P3	0.4495	0.2721	0.4192	0.3868	0.2198	0.203	0.4201	0.3046	0.1999	1.3098	1.3536	2.1981	0.1375	0.1375
ENSG00000184867	ARMCX2	1.167	1.8324	0.3746	1.2259	0.2336	0.2052	1.5321	1.1484	2.3399	2.4445	0.9124	1.7891	1.207	5.327
ENSG00000279702	AL356266.1	0.1375	0.1375	0.1375	0.1375	0.4554	0.1375	0.1375	0.1375	0.1375	0.1375	0.1375	0.1375	0.1375	0.1375
ENSG00000258120	KRT128P	0.1375	0.1375	0.1375	0.1375	0.1375	0.1375	0.1375	0.1375	0.1375	0.1375	0.1375	0.1375	0.1375	0.1375
ENSG00000261706	LINC00165	0.1375	0.1375	0.1375	0.1375	0.1375	0.1375	0.1375	0.1375	0.1375	0.1375	0.1375	0.1375	0.1375	0.1375
ENSG00000264695	AC007922.1	0.3002	0.1375	0.1375	0.1375	0.5674	0.4152	0.4853	0.1375	0.1375	0.1375	0.1375	0.1375	0.1375	0.1375
ENSG00000116641	DOCK7	2.7051	3.4529	2.0618	1.5678	1.4811	1.5207	2.4646	2.6992	3.2203	3.398	3.8607	4.3501	3.9505	0.1375
ENSG00000200063	SNORA30	3.8933	4.1028	2.7792	4.4176	4.9289	4.8387	1.868	3.2545	3.8497	3.8962	4.1099	4.6212	2.1836	4.0966
ENSG00000277469	HOTTIP_3	0.1375	0.1375	0.1375	0.1375	0.1375	0.1375	0.1375	0.1375	0.1375	0.1375	0.1375	0.1375	0.1375	0.1375
ENSG00000231422	LINC01516	0.1375	0.1375	0.1375	0.1375	0.1375	0.1375	0.1375	0.1375	0.1375	0.1375	0.2029	0.1375	0.1375	0.1375
ENSG00000198216	CACNA1E	3.2381	3.5549	2.8425	2.9227	3.9029	4.5462	1.4536	2.48	1.5791	0.1729	0.9044	0.6203	1.8176	2.8952
ENSG00000108604	SMARCD2	3.2144	3.9366	3.0231	2.6048	4.2778	3.857	4.6755	5.404	3.8043	4.1091	4.8591	5.3587	4.6548	5.2523
ENSG00000231031	LINC01804	0.1375	0.1375	0.1375	0.1375	0.1375	0.1375	0.1375	0.1375	0.1375	0.1375	0.1375	0.1375	0.1375	0.1375
ENSG00000139144	PIK3C2G	0.1375	0.1375	0.1375	0.1375	0.1375	0.1434	0.1375	0.1375	0.342	0.1375	0.1375	0.1375	0.1375	0.7406
ENSG00000282692	AC129915.3	0.1375	0.1375	0.1375	0.1375	0.1375	0.1375	0.1375	0.1375	0.1375	0.1375	0.1375	0.1375	0.1375	0.1375
ENSG00000229118	AC068491.2	0.1375	0.1375	0.1375	0.1375	0.1375	0.1375	0.1375	0.1375	0.1375	0.1375	0.1375	0.1375	0.1375	0.1375
ENSG00000270234	AL355333.1	0.1375	0.1375	0.1375	0.1375	0.1375	0.1375	0.1375	0.1375	0.1375	0.1375	0.1375	0.1375	0.1375	0.1375
ENSG00000048828	FAM120A	3.8906	4.2219	4.1717	4.1381	4.8867	4.8543	5.1168	5.3241	5.5299	5.2262	4.7979	5.0769	5.3537	5.5716
ENSG00000278153	AL121782.1	0.1375	0.1375	0.1375	0.2586	0.5188	0.1375	0.2444	0.1375	0.5201	0.1375	0.1375	0.5041	0.1375	0.1375
ENSG00000165171	METTL27	0.1375	0.3494	0.614	0.2472	0.232	0.1375	1.7961	0.5984	4.9222	4.2877	0.7591	0.5667	0.1375	0.1375
ENSG00000247049	AC008443.2	0.2539	0.1375	0.5013	0.3155	0.2604	0.1375	0.2702	0.6487	0.1375	0.1375	0.5339	0.2795	0.1375	0.1375
ENSG00000223223	RN7SKP192	0.2536	0.2385	0.1375	0.1375	0.1375	0.1872	0.1375	0.1375	0.1375	0.1375	0.1375	0.1375	0.1375	0.1375
ENSG00000213210	AC005229.2	0.1975	0.1375	0.1375	0.3809	0.1375	0.1375	0.3652	0.1375	0.1375	0.1375	0.2442	0.6154	0.1375	0.1375
ENSG00000213412	HNRNPA1P33	0.1375	0.1375	0.1375	0.1375	0.1375	0.1375	0.1375	0.1375	0.1375	0.1375	0.1375	0.1375	0.1375	0.1375
ENSG00000253125	AC055854.1	0.72	0.8104	0.5785	0.1375	0.4038	0.4165	0.7522	1.2892	0.2438	0.1375	0.3317	0.9124	0.1375	0.1375
ENSG00000124818	OPN5	0.1375	0.1375	0.1375	0.1375	0.1375	0.1375	0.1375	0.1375	0.1886	0.1375	0.175	0.1375	0.1375	0.1375
ENSG00000213930	GALT	1.0379	1.2136	1.6202	1.257	1.1837	1.6492	1.812	2.9956	2.1962	1.1998	1.524	2.4279	2.7044	2.8314
ENSG00000142303	ADAMTS10	0.2074	0.5786	0.4445	0.9153	0.4659	0.4732	0.7993	0.7895	0.1797	0.1375	0.3172	0.4168	0.9618	0.6382
ENSG00000151650	VENTX	1.3136	1.6508	1.4142	1.2397	1.5586	1.3902	1.3963	2.2499	1.7582	1.6828	2.8078	3.6969	1.9203	0.1375
ENSG00000227982	RPL7P30	0.1375	0.1375	0.1375	0.1375	0.1375	0.1375	0.1375	0.1375	0.1375	0.1375	0.1375	0.1375	0.1375	0.1375
ENSG00000243799	PEX5L-AS1	0.1375	0.1375	0.1375	0.1375	0.1375	0.1375	0.1375	0.1375	0.1375	0.1375	0.1375	0.1375	0.1375	0.1375
ENSG00000250473	DUTP7	0.1375	0.1375	0.1375	0.1375	0.1375	0.1375	0.1375	0.1375	0.1375	0.1375	0.1375	0.3491	0.1375	0.1375
ENSG00000278400	AC026120.2	0.1375	0.1375	0.1375	0.1375	0.1375	0.1375	0.1375	0.1375	0.1375	0.1375	0.1375	0.1375	0.1375	0.1375
ENSG00000239939	RPSAP34	0.1375	0.1375	0.1375	0.1375	0.1375	0.1375	0.1375	0.1375	0.1375	0.1375	0.1375	0.1375	0.1375	0.1375
ENSG00000081791	KIAA0141	3.2992	4.2117	2.7235	2.6382	3.255	3.5136	3.8967	3.7298	2.5095	3.8743	3.4341	4.3549	3.885	3.0164
ENSG00000201584	Y_RNA	0.1375	0.1375	0.1375	0.1375	0.1375	0.1375	0.1375	0.1375	0.1375	0.1375	0.1375	0.1375	0.1375	0.1375
ENSG00000181929	PRKAG1	3.901	4.39	3.5408	4.372	3.9058	4.1387	4.1649	4.6326	4.9832	4.5984	4.5042	5.025	3.867	4.9868
ENSG00000271704	BNIP3P20	0.1375	0.1375	0.1375	0.1375	0.1375	0.1375	0.1375	0.1375	0.1375	0.1375	0.1375	0.1375	0.1375	0.1375
ENSG00000185760	KCNQ5	0.1837	0.2052	0.1726	0.1534	0.4169	0.1718	0.26	0.5486	0.5128	0.1375	0.1661	0.2371	0.1375	0.1375
ENSG00000260548	AL035425.2	0.1375	0.1375	0.1375	0.1375	0.1375	0.1375	0.1375	0.1375	0.1375	0.1375	0.1375	0.1375	0.1375	0.1375
ENSG00000157119	KLHL40	0.1375	0.1375	0.1842	0.1375	0.1375	0.1375	0.1375	0.1375	0.1375	0.1375	0.1375	0.2675	0.1375	0.1375
ENSG00000259135	AL445363.2	0.1375	0.1375	0.1375	0.1375	0.1375	0.1375	0.1375	0.1375	0.1375	0.1375	0.1375	0.1375	0.1375	0.1375
ENSG00000252233	RN7SKP253	1.8034	1.2311	1.8847	2.3776	2.6353	2.6597	0.4089	1.8368	1.9886	1.3443	1.139	1.3526	1.3227	0.1375
ENSG00000123965	PMS2P5	0.3472	0.3934	0.4326	0.1375	0.3055	0.4628	0.72	0.1375	0.7265	2.4354	0.3761	0.438	0.1375	0.1375
ENSG00000251638	AC006390.1	0.1375	0.1375	0.1375	0.1375	0.1375	0.1375	0.1375	0.1375	0.1375	0.1375	0.1375	0.1375	0.1375	0.1375
ENSG00000000457	SCYL3	0.873	1.2252	0.7004	1.0094	2.2573	2.1286	2.4542	1.6772	4.3477	2.9882	2.2198	2.2689	0.7021	0.1375
ENSG00000266467	RN7SL220P	1.4674	2.2121	1.1728	1.6817	2.8016	2.9807	2.5884	2.8232	1.9266	0.1375	1.9864	2.7757	0.1375	2.0867
ENSG00000139697	SBNO1	3.3424	3.5312	2.9717	3.24	2.9683	2.7053	2.7331	2.6965	4.5157	3.3636	2.7617	2.6464	3.3557	2.8904
ENSG00000249317	AC002460.1	0.1375	0.1375	0.1375	0.1375	0.1375	0.1375	0.1375	0.1375	0.1375	0.1375	0.1375	0.1375	0.1375	0.1375
ENSG00000100307	CBX7	1.7635	2.3324	2.2801	1.7036	2.5547	2.2997	3.2925	4.5052	3.3742	3.3722	1.5816	1.9981	2.2821	5.2366
ENSG00000215452	ZNF663P	0.2057	0.1375	0.1375	0.1375	0.1375	0.1375	0.1812	0.4383	1.2408	0.1375	0.1375	0.1375	0.1375	0.1375
ENSG00000242766	IGKV1D-17	0.1375	0.1375	0.1375	0.1375	0.1375	0.1375	0.1375	0.1375	0.1375	0.1375	0.1375	0.1375	0.1375	0.1375
ENSG00000254522	AP001767.1	0.4776	0.3472	0.4556	0.1375	0.1375	0.3864	0.2914	0.1375	0.1747	0.1375	0.8461	0.9855	0.1375	0.1375
ENSG00000233442	PPP6R2P1	0.1375	0.1375	0.1375	0.1375	0.1375	0.1375	0.1375	0.1375	0.1375	0.1375	0.1375	0.1375	0.1375	0.1375
ENSG00000166569	CPLX4	0.1375	0.1375	0.1375	0.1375	0.1375	0.1375	0.1375	0.1375	0.1375	0.1375	0.1375	0.1375	0.1375	0.1375
ENSG00000196403	OR10D1P	0.1375	0.1375	0.1375	0.3059	0.1375	0.1883	0.1375	0.1375	0.1375	0.1375	0.2075	0.1375	0.1375	0.1375
ENSG00000256513	AC022081.1	0.1375	0.1375	0.1375	0.1375	0.1375	0.1375	0.1375	0.1375	0.1375	0.1375	0.1375	0.1375	0.1375	0.1375
ENSG00000053254	FOXN3	5.2064	5.0413	4.7099	5.2322	4.6455	4.8612	4.867	5.5169	5.4459	5.3082	5.4999	5.9425	6.0832	6.1971
ENSG00000283736	MIR484	0.7546	0.4555	0.1375	0.7647	0.3533	1.0194	0.2687	0.4456	0.1375	0.1375	0.2296	0.1375	0.1375	0.1375
ENSG00000159239	AC005041.1	0.1375	0.2157	0.1375	0.1375	0.1375	0.1375	0.3896	0.4357	2.904	2.4551	0.1375	0.1917	0.3322	0.1375
ENSG00000252810	RNU6-345P	0.1375	0.1375	0.1375	0.1375	0.1375	0.1375	0.1375	0.1375	0.1375	0.1375	0.1375	0.1375	0.1375	0.1375
ENSG00000156869	FRRS1	0.8663	0.5132	0.1375	0.5106	0.6479	0.6397	1.7908	1.199	3.878	1.3832	1.5902	1.5062	1.5268	0.1375
ENSG00000244314	RN7SL36P	0.1375	0.853	0.1375	0.1603	0.4354	0.1375	0.1375	1.3153	0.1375	0.1375	1.2349	1.4592	1.6438	0.1375
ENSG00000266042	AC015818.7	0.1375	0.1375	0.1375	0.1375	0.1375	0.1375	0.1375	0.1375	0.1375	0.1375	0.1375	0.1375	0.1375	0.1375
ENSG00000271322	AL357312.1	0.1375	0.1375	0.1375	0.1375	0.1375	0.1375	0.1375	0.1375	0.1375	0.1375	0.1375	0.1375	0.1375	0.1375
ENSG00000129071	MBD4	2.3807	3.0445	1.7596	1.8514	2.855	2.6768	3.454	3.9266	3.8178	2.7512	3.3849	3.6756	3.9174	2.5119
ENSG00000130559	CAMSAP1	2.2108	2.7598	1.797	2.0783	2.363	2.1446	3.7446	4.1289	5.0517	4.733	4.0096	4.8186	4.3159	2.7244
ENSG00000166862	CACNG2	0.1375	0.1375	0.1375	0.1375	0.1375	0.1375	0.1375	0.1375	0.1375	0.1375	0.1375	0.1375	0.1375	0.1375
ENSG00000259953	AL138756.1	1.351	1.7944	0.7166	0.618	0.9653	1.1924	0.8767	1.3482	1.6189	1.646	1.9169	2.5303	1.2419	0.8053
ENSG00000232245	AL035415.1	0.1375	0.1375	0.1375	0.1375	0.1375	0.1375	0.1375	0.1375	0.1375	0.1375	0.1375	0.1375	0.1375	0.1375
ENSG00000249806	AC139720.1	0.2481	0.1375	0.1375	0.1375	0.1375	0.1375	0.6047	0.1375	1.4794	0.1375	0.432	0.1375	0.1375	0.1375
ENSG00000250716	LINC01017	0.1375	0.1375	0.1375	0.1375	0.1375	0.1375	0.1375	0.1375	0.1375	0.1375	0.1375	0.1375	0.1375	0.1375
ENSG00000231636	AGBL5-AS1	0.3081	0.1375	0.1375	0.1375	0.1375	0.1375	0.3966	0.1375	0.4597	0.1375	0.1375	0.1375	0.1375	0.1375
ENSG00000274940	MIR8083	0.1375	0.1375	0.1375	0.1375	0.1375	0.1375	0.1375	0.1375	0.1375	0.1375	0.1375	0.1375	0.1375	0.1375
ENSG00000221325	MIR1200	2.6254	1.35	1.2636	2.441	2.1517	1.759	1.07	1.3547	2.4627	0.1375	2.242	2.4132	2.3207	2.435
ENSG00000257303	AC073896.2	0.1375	0.1375	0.3212	0.1375	0.1375	0.1375	0.1375	0.1375	1.8786	1.6424	0.5838	0.1375	0.1375	0.1375
ENSG00000248625	AC079768.1	0.1375	0.1375	0.1375	0.1375	0.1375	0.1375	0.1375	0.1375	0.1375	0.1375	0.1375	0.1375	0.1375	0.1375
ENSG00000100393	EP300	5.8821	6.4062	5.5672	5.9793	6.2827	6.5182	5.6445	6.355	5.5527	4.9213	5.6244	6.2039	6.0096	6.3775
ENSG00000115274	INO80B	1.7543	1.9797	2.1204	1.8322	1.8601	1.7681	3.2654	3.7769	3.6026	3.5748	2.3116	3.1938	2.6887	0.1375
ENSG00000264115	MIR3180-4	0.1375	0.1375	0.1375	0.1375	0.1375	0.1375	0.1375	0.1375	0.1375	0.1375	0.1375	0.1375	0.1375	0.1375
ENSG00000227440	ATP5G1P4	0.1375	0.1375	0.1375	0.1375	0.1375	0.1375	0.1375	0.1375	0.1375	0.1375	0.1375	0.1375	0.1375	0.1375
ENSG00000274080	AC005089.1	0.1375	0.2006	0.1375	0.1375	0.2101	0.1375	0.1375	0.1375	0.1375	0.1375	0.1375	0.1375	0.1375	0.1375
ENSG00000130707	ASS1	1.1423	1.5574	0.613	0.1375	0.2278	0.9581	5.1704	4.0372	1.506	0.1375	0.9959	0.8365	2.0991	5.7492
ENSG00000187555	USP7	4.6979	5.0393	4.1916	4.2969	4.4491	4.4798	4.2123	4.4712	5.0195	5.0369	4.5393	4.7129	5.3783	4.4832
ENSG00000222640	RNU2-51P	0.1375	0.1375	0.1375	0.1375	0.1375	0.1375	0.1375	0.1375	0.1375	0.1375	0.1375	0.1375	0.1375	0.1375
ENSG00000228440	MTND5P6	0.1375	0.1375	0.1375	0.1375	0.1375	0.1375	0.1375	0.1375	0.1375	0.1375	0.1375	0.1375	0.1375	0.1375
ENSG00000274076	RN7SL539P	0.1375	0.1375	0.1375	0.1375	0.1375	0.1375	0.1375	0.1375	0.1375	0.1375	0.1375	0.1375	0.1375	0.1375
ENSG00000226629	LINC00974	0.1375	0.1375	0.1375	0.1375	0.1375	0.1375	0.1375	0.1375	0.1375	0.1375	0.1971	0.1375	0.1375	0.1375
ENSG00000114209	PDCD10	3.2251	3.9218	3.0588	3.4303	3.9999	3.7605	4.2168	3.5964	4.81	3.8373	4.3107	4.2531	4.8247	2.2586
ENSG00000089597	GANAB	4.0008	4.3785	3.8795	3.9379	4.1301	4.3141	4.4904	5.3098	4.519	5.4001	4.531	5.0564	5.4937	4.5158
ENSG00000253605	HNRNPA1P38	0.2173	0.1375	0.1375	0.2958	0.1375	0.1872	0.1375	0.381	0.1375	0.1375	0.2051	0.1375	0.1375	0.1375
ENSG00000124490	CRISP2	0.1375	0.1375	0.1375	0.1375	0.1375	0.291	0.3637	0.1375	3.1307	1.9606	0.1375	0.1375	0.1375	0.1375
ENSG00000118939	UCHL3	2.2042	1.6035	1.9793	1.8137	2.0527	1.5046	3.0254	1.7011	3.7863	2.2467	2.0646	1.5957	1.7773	0.1375
ENSG00000201812	RNA5SP488	0.1375	0.1375	0.1375	0.1375	0.1375	0.1375	0.2827	0.4929	0.1375	0.1375	0.4171	0.5755	0.1375	0.1375
ENSG00000224050	AL008723.1	0.1375	0.1375	0.1375	0.1375	0.1375	0.1375	0.1375	0.1375	0.1375	0.1375	0.1375	0.1375	0.1375	0.1375
ENSG00000231465	AL359636.2	0.1375	0.1375	0.1375	0.1375	0.1375	0.1375	0.1375	0.1375	0.1375	0.1375	0.1375	0.1375	0.1375	0.1375
ENSG00000227851	AC021035.1	0.1375	0.1375	0.1375	0.1375	0.1375	0.1375	0.1375	0.1375	0.1375	0.1375	0.1375	0.1375	0.1375	0.1375
ENSG00000242387	HIST1H2APS2	0.1375	0.1375	0.1375	0.1375	0.1375	0.1375	0.1375	0.1375	0.1375	0.1375	0.1375	0.1375	0.1375	0.1375
ENSG00000232853	LUZP4P1	0.1375	0.1375	0.1375	0.1375	0.1375	0.1375	0.1375	0.1375	0.1375	0.1375	0.1375	0.1375	0.1375	0.1375
ENSG00000231084	AL136133.1	0.1375	0.1375	0.1375	0.2017	0.2769	0.1375	0.1375	0.1375	0.1375	0.1375	0.1375	0.1375	0.1375	0.1375
ENSG00000048740	CELF2	4.2344	4.5143	4.5126	5.0639	5.5555	6.0459	5.1095	5.7442	5.2205	4.8559	5.7124	6.7025	5.3837	6.3996
ENSG00000164972	C9orf24	1.4481	1.4898	0.3308	0.2697	1.4631	0.9433	5.3927	3.7801	7.8425	7.5273	1.0663	0.7338	1.875	0.1375
ENSG00000186124	OR9M1P	0.1375	0.1375	0.1375	0.1375	0.1375	0.1375	0.1375	0.1375	0.1375	0.1375	0.1375	0.1375	0.1375	0.1375
ENSG00000265243	IGLJCOR18	0.1375	0.1375	0.1375	0.1375	0.1375	0.1375	0.1375	0.1375	0.1375	0.1375	0.1375	0.1375	0.1375	0.1375
ENSG00000270090	AL590235.2	0.1375	0.1375	0.1375	0.1375	0.1375	0.1375	0.1375	0.1375	0.1375	0.1375	0.1375	0.1375	0.1375	0.1375
ENSG00000222509	Y_RNA	0.1375	0.1375	0.1375	0.1375	0.1375	0.1375	0.1375	0.1375	0.1375	0.1375	0.1375	0.1375	0.1375	0.1375
ENSG00000138246	DNAJC13	3.0119	3.201	2.4056	2.3706	3.9626	3.9881	4.1083	4.1411	3.8641	4.6946	5.145	5.3966	4.3197	4.6025
ENSG00000206828	U1	3.8983	4.4421	3.4882	4.7827	2.1913	2.6326	4.0913	4.2507	4.5079	5.342	7.0227	7.02	6.0216	4.9454
ENSG00000270491	AL359999.1	0.1375	0.1375	0.1375	0.1375	0.1375	0.1375	0.1375	0.1375	0.1375	0.1375	0.1375	0.1375	0.1375	0.1375
ENSG00000156234	CXCL13	1.1841	0.9696	0.2739	0.224	0.1375	0.1375	1.1465	0.2858	0.1375	0.1375	2.21	0.9091	0.1375	0.1375
ENSG00000103522	IL21R	1.5571	2.0131	1.9586	1.7713	2.1563	2.2011	3.2134	3.3011	1.2521	2.035	3.1268	3.5685	2.1787	0.1375
ENSG00000215221	UBA52P6	0.8284	0.9939	0.5405	0.7831	0.1375	0.1375	1.1206	0.9145	1.0834	0.1375	1.6221	2.4238	0.1375	0.1375
ENSG00000131269	ABCB7	1.9472	2.2631	1.6497	1.4136	1.5245	1.2349	2.309	2.2948	2.6115	0.7363	2.5083	2.3681	3.3923	0.1375
ENSG00000267180	AC007136.1	0.1375	0.1375	0.5738	0.5953	0.1375	0.1375	1.2039	0.9829	0.1375	0.1375	0.1375	0.1375	0.1375	0.1375
ENSG00000234319	RPS12P2	0.1375	0.1375	0.1375	0.1375	0.1375	0.1375	0.1375	0.1375	0.1375	0.1375	0.1375	0.1375	0.1375	0.1375
ENSG00000276489	MIR6829	1.0704	0.5851	0.1375	1.3199	0.1375	0.1375	3.2386	3.5418	1.5157	2.2534	4.6651	5.1584	0.1375	0.365
ENSG00000213216	AC007066.1	0.1375	0.1375	0.1375	0.1375	0.1375	0.1375	0.1375	0.1375	0.1375	0.1375	0.1375	0.1375	0.8783	0.1375
ENSG00000094880	CDC23	0.6691	1.1106	0.3835	0.5933	0.8054	0.6323	2.2671	1.9201	3.308	2.8237	1.184	1.6144	1.9082	2.4988
ENSG00000251215	GOLGA5P1	2.1231	1.694	1.6408	1.9599	3.9785	2.9481	1.7154	2.0481	1.686	2.0252	1.7453	2.0912	2.3878	2.3087
ENSG00000214338	SOGA3	0.1375	0.1375	0.1375	0.1375	0.1375	0.1375	0.1375	0.1375	0.1375	0.1375	0.1375	0.1375	0.1375	0.1375
ENSG00000215450	AL022342.1	0.1375	0.1375	0.1375	0.1375	0.1375	0.1375	0.1375	0.1375	0.1375	0.1375	0.1375	0.2701	0.1375	0.1375
ENSG00000242728	UQCRHP4	0.1375	0.1375	0.1375	0.1375	0.1375	0.1375	0.1375	0.1375	0.1375	0.1375	0.1375	0.1375	0.1375	0.1375
ENSG00000129028	THAP10	0.1375	0.307	0.1375	0.1375	0.1753	0.1375	0.9639	0.6016	2.6964	2.0223	0.244	0.2723	0.4146	0.1375
ENSG00000259466	NPM1P47	0.1375	0.1375	0.1375	0.1375	0.1375	0.1375	0.1375	0.1375	0.2977	0.1375	0.1375	0.1375	0.1375	0.1375
ENSG00000267277	AC024575.1	0.3524	0.1375	0.1375	0.1375	0.1375	0.3343	0.5105	0.1375	1.3235	0.1375	0.1375	0.1375	0.1375	0.1375
ENSG00000239200	CR383656.1	0.1375	0.1375	0.1375	0.1375	0.1375	0.1375	0.1375	0.1375	0.1375	0.1375	0.1375	0.1375	0.1375	0.1375
ENSG00000254431	AC084083.1	0.1375	0.1375	0.1375	0.1375	0.1375	0.1375	0.2561	0.1375	0.1375	0.1375	0.1375	0.1375	0.1375	0.1375
ENSG00000213088	ACKR1	0.1375	0.1375	0.1375	0.1375	0.1375	0.1375	0.1375	0.1375	0.1375	0.1375	0.1375	0.5032	0.1375	0.1375
ENSG00000075624	ACTB	10.9489	11.1869	11.4339	11.5728	12.0527	11.857	10.8614	11.8288	11.8804	11.6369	11.4669	12.0545	10.8242	12.8836
ENSG00000236617	AC127070.2	1.5153	2.3813	0.1375	0.618	0.2924	0.1375	0.7382	0.4748	1.5259	1.4287	0.7035	0.6074	0.1375	0.1375
ENSG00000175920	DOK7	0.1375	0.2454	0.1375	0.3159	0.1375	0.1375	0.5554	0.7977	0.8189	0.1375	0.1375	0.1375	0.1375	2.2736
ENSG00000233260	RPSAP63	0.1375	0.1375	0.1375	0.1375	0.1375	0.1375	0.1375	0.1375	0.1375	0.1375	0.1375	0.1375	0.1375	0.1375
ENSG00000252821	RNU6-388P	0.1375	0.1375	0.1375	0.1375	0.1375	0.1375	0.1375	0.1375	0.1375	0.1375	0.388	0.1375	0.1375	0.1375
ENSG00000215760	TAF9BP2	0.1375	0.1375	0.1375	0.1375	0.1375	0.1375	0.1375	0.1375	0.1375	0.1375	0.1375	0.1375	0.1375	0.1375
ENSG00000225864	HCG4P11	1.5568	2.1396	1.1991	1.2623	1.3325	1.9357	2.3303	3.6681	1.6724	1.8411	2.796	3.7068	1.6926	2.8705
ENSG00000168297	PXK	3.7737	3.6719	4.209	4.3624	5.9397	6.0115	4.2058	4.7656	4.8508	4.4537	3.0881	3.6962	3.5636	3.6927
ENSG00000219500	AL391417.1	0.1375	0.1375	0.1375	0.1375	0.1375	0.1375	0.1375	0.1375	0.1375	0.1375	0.1375	0.1375	0.1375	0.1375
ENSG00000248967	AC022493.2	0.1375	0.1375	0.1375	0.1375	0.1375	0.1375	0.1375	0.1375	0.4738	0.1375	0.3897	0.1375	0.1375	0.1375
ENSG00000167613	LAIR1	4.0324	4.8206	4.7135	5.0391	5.9458	6.2257	7.1068	7.6052	5.2713	6.7302	8.1637	8.6251	6.184	3.5206
ENSG00000233821	ENOX1-AS1	0.1375	0.1375	0.1375	0.1375	0.1375	0.1375	0.1375	0.1375	0.1375	0.1375	0.1375	0.1375	0.1375	0.1375
ENSG00000226961	PPIAP60	0.1375	0.1375	0.1375	0.1375	0.1375	0.1375	0.2883	0.1375	0.1375	0.1375	0.2356	0.1375	0.1375	0.1375
ENSG00000276317	AL357033.3	4.3428	4.9858	2.8209	2.7627	2.841	2.8991	2.5103	3.2539	3.0338	2.3805	2.5853	2.9202	3.1242	3.224
ENSG00000283761	AC118553.2	2.0206	0.8211	1.181	1.7035	2.0051	1.7804	1.2587	1.8371	2.0577	2.1283	2.9029	2.8035	0.4563	1.5443
ENSG00000142733	MAP3K6	0.9924	1.9638	1.3734	1.0611	1.2082	1.1519	2.5599	3.197	2.9106	2.4639	2.4748	3.3865	1.963	1.2824
ENSG00000267771	AC011447.4	0.1375	0.1375	0.1375	0.1375	0.1375	0.1375	0.1375	0.1375	0.1375	0.1375	0.1375	0.1375	0.1375	0.1375
ENSG00000208009	MIR130A	0.1375	0.1375	0.1375	0.1375	0.1375	0.1375	0.1375	0.1375	0.1375	0.1375	0.1375	0.1375	0.1375	0.1375
ENSG00000234199	LINC01191	3.6327	3.4776	3.371	3.5054	2.6382	2.2817	2.683	2.9895	2.648	1.5476	2.1744	1.831	2.1881	3.746
ENSG00000270924	AC140658.5	0.1375	0.1375	0.1375	0.1375	0.1375	0.1375	0.1375	0.1375	0.1375	0.1375	0.1375	0.1375	0.1375	0.1375
ENSG00000271625	PSMA6P4	0.1375	0.1375	0.1375	0.1375	0.1375	0.1375	0.1375	0.1375	0.1375	0.1375	0.1375	0.1375	0.1375	0.1375
ENSG00000279119	AC006449.7	1.5422	1.6135	1.3499	1.5512	0.5686	0.3801	1.1566	0.8557	1.0099	0.1375	1.3813	1.5316	0.1375	0.1375
ENSG00000263017	AC036164.1	0.1375	0.1375	0.1375	0.1375	0.1375	0.1375	0.1375	0.1375	0.1375	0.1375	0.1375	0.1375	0.1375	0.1375
ENSG00000269985	AL021328.1	0.1375	0.1375	0.1375	0.1375	0.1375	0.1375	0.2407	0.1375	0.1375	0.1375	0.1375	0.1375	0.1375	0.1375
ENSG00000255093	AP002008.2	0.1375	0.1375	0.1375	0.1375	0.1375	0.1375	0.1375	0.1375	0.1375	0.1375	0.1375	0.1375	0.1375	0.1375
ENSG00000224137	LINC01857	2.9701	3.5056	2.4836	2.1474	0.1375	0.1375	1.4241	1.358	1.1721	0.1375	1.0316	0.7013	0.1375	0.1375
ENSG00000211828	TRDJ3	0.1375	0.1375	0.1375	0.1375	0.1375	0.1375	0.8629	0.1375	0.1375	0.1375	0.391	0.1375	0.1375	0.1375
ENSG00000205186	FABP9	0.1375	0.1375	0.1375	0.1375	0.1375	0.1375	0.1375	0.1375	0.1375	0.1375	0.1375	0.1375	0.1375	0.1375
ENSG00000250727	AC100871.1	0.1375	0.1375	0.1375	0.1375	0.1375	0.1375	0.1375	0.1375	0.1375	0.1375	0.1375	0.1375	0.1375	0.1375
ENSG00000087111	PIGS	2.1694	2.4789	2.0858	2.402	2.7335	2.3113	3.5598	3.9456	3.1693	3.6497	3.237	3.8575	3.4262	3.3815
ENSG00000272293	AC083964.1	0.1981	0.1375	0.1375	0.1375	0.1375	0.1375	0.1375	0.1375	0.1375	0.1375	0.1375	0.1375	0.1375	0.1375
ENSG00000104695	PPP2CB	3.2726	3.6587	2.9054	2.4676	3.1165	3.2403	5.3318	5.8006	5.6196	5.5252	4.9826	5.3185	4.6801	4.5905
ENSG00000121053	EPX	0.1375	0.1375	0.1375	0.1375	0.1375	0.1375	0.1375	0.1375	0.1375	0.1375	0.1375	0.1375	0.1375	0.1375
ENSG00000007372	PAX6	0.1949	0.2607	0.1375	0.1617	0.1375	0.1375	0.167	0.2277	0.1583	0.1375	0.1375	0.5032	0.1375	1.6745
ENSG00000237275	AL450023.3	0.1375	0.1375	0.1375	0.1375	0.1375	0.1375	0.1375	0.1375	0.1375	0.1375	0.1375	0.1375	0.1375	0.1375
ENSG00000230375	GSTA11P	0.1375	0.1375	0.1375	0.1375	0.1375	0.1375	0.1375	0.1375	0.1375	0.1375	0.1375	0.1375	0.1375	0.1375
ENSG00000167910	CYP7A1	0.4369	0.2317	0.1774	0.3986	0.1679	0.1695	0.1375	0.1375	0.1976	0.3216	0.1375	0.1375	0.1375	0.1375
ENSG00000205209	SCGB2B2	0.147	0.1375	0.2657	0.1375	0.1375	0.1375	0.6177	0.4423	0.1375	0.1375	0.1635	0.5445	0.1375	0.1375
ENSG00000271092	TMEM56-RWDD3	0.1375	0.1375	0.1375	0.1375	0.1375	0.1375	0.1375	0.3059	0.1375	0.1375	0.1375	0.1946	0.1375	0.1375
ENSG00000236464	LINC02559	0.1375	0.1375	0.1375	0.1375	0.1375	0.1375	0.1375	0.1375	0.1375	0.1375	0.1375	0.1375	0.1375	0.1375
ENSG00000217950	NOC2LP2	0.1375	0.1375	0.1375	0.1375	0.1375	0.1375	0.1375	0.1375	0.1375	0.1375	0.1375	0.1375	0.1375	0.1375
ENSG00000246273	SBF2-AS1	1.1244	1.3345	0.5678	0.2326	0.3491	0.33	0.9271	0.749	2.2381	1.9827	0.4608	1.0441	1.0164	0.1375
ENSG00000224155	AC073136.2	0.1375	0.1375	0.1375	0.1375	0.1375	0.1375	0.1375	0.1375	0.1375	0.1375	0.1375	0.1375	0.1375	0.1375
ENSG00000198804	MT-CO1	12.5387	12.5979	11.2518	10.8532	11.2013	11.6742	13.689	12.4768	11.7488	12.9769	13.9707	12.7947	12.8616	12.2911
ENSG00000233406	AL162430.1	0.1375	0.5225	0.1375	0.1375	0.1375	0.1375	0.1375	0.1375	0.1375	0.1375	0.332	0.3243	0.1375	0.1375
ENSG00000118322	ATP10B	0.366	0.1752	0.184	0.2019	0.1375	0.1628	2.455	0.9117	3.1709	2.138	0.1782	0.2335	0.1375	0.4308
ENSG00000206744	RNU6-620P	0.1375	0.1375	0.1375	0.1375	0.1375	0.1375	0.1375	0.1375	0.1375	0.1375	0.1375	0.1375	0.1375	0.1375
ENSG00000112337	SLC17A2	0.1375	0.1375	0.1375	0.1375	0.1375	0.1375	0.1375	0.1375	0.1375	0.1375	0.1375	0.1375	0.1375	0.1375
ENSG00000206802	RNU6-926P	0.1375	0.1375	0.1375	0.1375	0.1375	0.1375	0.1375	0.1375	0.1375	0.1375	0.1375	0.1375	0.1375	0.1375
ENSG00000279386	AC021106.3	0.1375	0.1375	0.1375	0.1375	0.1375	0.1375	0.1375	0.1375	0.1375	0.1375	0.1375	0.1375	0.1375	0.1375
ENSG00000091986	CCDC80	0.1469	0.1544	0.1375	0.1375	0.1375	0.1528	1.2449	0.8647	3.1306	1.9747	0.1939	0.1647	0.1375	0.1375
ENSG00000273999	RBM17P2	0.1375	0.1375	0.1375	0.1375	0.1375	0.1375	0.1375	0.1375	0.1375	0.1375	0.1375	0.1375	0.1375	0.1375
ENSG00000253461	IGKV1-35	0.1375	0.1375	0.1375	0.1375	0.1375	0.1375	0.1375	0.1375	0.1375	0.1375	0.1375	0.1375	0.1375	0.1375
ENSG00000225850	AL355490.1	0.6867	1.2871	0.4466	0.5118	2.1397	1.7258	1.0026	1.285	1.2754	1.2372	0.4749	0.6787	1.542	0.1375
ENSG00000269271	AC245036.5	0.327	0.6586	0.3161	0.2088	0.2052	0.2086	0.4032	0.225	0.4876	0.518	0.1875	0.4044	0.1937	0.1375
ENSG00000167987	VPS37C	4.6726	5.3745	4.3804	4.6599	4.3894	4.3611	5.2708	6.1941	5.1569	4.8455	5.4384	5.9435	5.3595	5.4576
ENSG00000108556	CHRNE	2.4221	3.2518	2.953	3.3737	4.2367	4.5654	2.6844	3.2482	3.1629	2.5642	3.3141	3.7594	2.6587	2.6947
ENSG00000144199	FAHD2B	0.2997	0.1375	0.22	0.2471	0.2771	0.1375	0.5862	0.6337	1.4752	1.081	0.1375	0.5369	0.3994	0.1375
ENSG00000253467	IGHV7-40	0.1375	0.1375	0.1375	0.1375	0.1375	0.1375	0.1375	0.1375	0.1375	0.1375	0.1375	0.1375	0.1375	0.1375
ENSG00000227885	AL590652.1	0.1375	0.1375	0.1375	0.1375	0.1375	0.1375	0.1375	0.1375	0.1375	0.1375	0.1375	0.1375	0.1375	0.1375
ENSG00000250107	CACNA1G-AS1	0.1375	0.1375	0.1375	0.1375	0.1375	0.1375	0.1375	0.1375	0.1375	0.1375	0.1375	0.1375	0.1375	0.1375
ENSG00000233318	RPL31P45	0.1375	0.1375	0.1375	0.1375	0.1375	0.1375	0.1375	0.1375	0.1375	0.1375	0.1375	0.5551	0.1375	0.1375
ENSG00000277049	5S_rRNA	0.1375	0.1375	0.1375	0.1375	0.1375	0.1375	0.6971	0.1375	0.1375	0.1375	0.7383	0.1375	0.1375	0.1375
ENSG00000186462	NAP1L2	0.2838	0.2459	0.2699	0.1789	0.1375	0.1375	0.6704	0.304	0.3974	0.1375	0.1375	0.1375	0.1375	0.1375
ENSG00000273493	AC098479.1	0.3993	0.5436	0.1375	0.4821	0.6005	0.8773	0.1375	0.1375	0.7446	0.1375	0.7217	0.1375	0.1375	0.1375
ENSG00000201467	SNORA16	0.1375	0.1375	0.1375	0.1375	0.1375	0.1375	0.1375	0.1375	0.1375	0.1375	0.1375	0.1375	0.1375	0.1375
ENSG00000109323	MANBA	5.4813	6.0872	4.7986	5.0892	4.0253	4.0771	4.6468	5.5425	4.2781	4.0537	5.1887	5.0558	5.8034	4.5068
ENSG00000213279	Z97192.2	0.6013	0.7043	0.2994	0.3383	1.4174	1.3663	0.1934	0.549	0.4602	0.3639	1.0919	1.5946	0.1375	0.1375
ENSG00000218510	LINC00339	0.8902	1.4359	0.7993	1.0094	0.7096	0.9572	2.2205	3.5326	2.8373	3.1984	2.4878	2.7697	2.2073	5.1249
ENSG00000213946	DNAJB1P1	0.1845	0.1375	0.1375	0.1375	0.1375	0.1375	0.2136	0.1375	0.1375	0.1375	0.1375	0.2303	0.6899	0.1375
ENSG00000254481	PTP4A2P2	0.1375	0.1375	0.1375	0.1375	0.1375	0.1375	0.1375	0.3361	0.1375	0.1375	0.1375	0.4382	0.1375	0.1375
ENSG00000259684	AC084756.1	0.1375	0.1375	0.1375	0.1375	0.1375	0.1375	0.1375	0.1375	0.1375	0.1375	0.1375	0.1375	0.1375	0.1375
ENSG00000275183	LENG9	1.9552	1.5044	2.3001	2.665	1.8535	1.6962	3.286	3.0785	4.0743	4.1767	2.9429	3.764	0.6801	3.1486
ENSG00000227729	RD3L	0.1375	0.1375	0.1375	0.1375	0.1375	0.1375	0.1375	0.1375	0.1375	0.1375	0.1375	0.1375	0.1375	0.1375
ENSG00000211728	TRBV5-6	0.1375	0.5067	0.4834	0.1375	0.1375	0.1375	1.0442	0.1375	0.1375	0.1375	0.5646	0.6749	0.1375	0.1375
ENSG00000252548	RNU7-149P	0.1375	0.1375	0.1375	0.1375	0.1375	0.1375	0.1375	0.1375	0.1375	0.1375	0.1375	0.1375	0.1375	0.1375
ENSG00000156453	PCDH1	0.5337	0.6389	0.1617	0.1574	0.1656	0.3124	2.6636	1.4619	4.9614	3.7964	0.2359	0.3065	0.3074	2.7381
ENSG00000273047	AL121845.2	0.1375	0.6066	0.1375	0.1375	0.1375	0.3837	0.1375	0.1375	0.1375	0.1375	0.1375	0.6048	0.1375	0.1375
ENSG00000260233	SSSCA1-AS1	1.9362	2.553	1.6347	1.7977	1.7266	1.2906	2.4107	2.56	2.1008	2.6524	1.4982	2.4536	2.1633	3.416
ENSG00000231811	AL159166.1	0.1375	0.1375	0.1375	0.1375	0.1375	0.1375	0.1375	0.1375	0.1375	0.1375	0.1375	0.1375	0.1375	0.1375
ENSG00000283178	BX119927.1	0.1375	0.1375	0.1375	0.1375	0.1375	0.1375	0.1375	0.1375	0.1375	0.1375	0.1375	0.1375	0.1375	0.1375
ENSG00000139914	FITM1	1.0304	1.8365	0.7973	1.0943	1.2375	0.9324	1.1723	1.265	1.4041	0.1375	0.7847	1.0785	1.4525	2.557
ENSG00000218582	GAPDHP63	0.1947	0.1994	0.1375	0.1375	0.1375	0.1375	0.2051	0.1375	0.1375	0.1375	0.1375	0.1375	0.1375	0.1375
ENSG00000279667	AL603839.4	0.5241	0.2737	0.3562	0.5232	0.4384	0.3985	0.2271	0.1375	0.459	0.9806	0.4219	0.4517	0.4607	0.1375
ENSG00000164078	MST1R	0.1375	0.3791	0.1625	0.1602	0.2134	0.1375	1.26	0.5899	2.9958	3.2797	0.2231	0.2439	0.1375	0.1375
ENSG00000277947	SNORD3D	0.1375	0.1375	0.1375	0.1375	0.1375	0.1375	0.1375	0.1375	0.1375	0.1375	0.1375	0.1375	0.1375	0.1375
ENSG00000259585	RBM17P4	0.1375	0.1375	0.1375	0.1375	0.1375	0.2164	0.1375	0.1375	0.1375	0.1375	0.1799	0.1375	0.1375	0.1375
ENSG00000231403	AC099344.2	0.1375	0.1375	0.1375	0.1375	0.1375	0.1375	0.1375	0.1375	0.1375	0.1375	0.1375	0.1375	0.1375	0.1375
ENSG00000213270	RPL6P25	0.1375	0.1375	0.1375	0.1375	0.1375	0.1375	0.1375	0.1375	0.1375	0.1375	0.1375	0.1375	0.1375	0.1375
ENSG00000222529	Y_RNA	0.1375	0.1375	0.1375	0.1375	0.1375	0.1375	0.1375	0.1375	0.1375	0.1375	0.1375	0.1375	0.1375	0.1375
ENSG00000272917	AC010186.4	0.1375	0.1375	0.1375	0.1375	0.5419	0.1375	0.1375	0.1375	0.1375	0.1375	0.7585	0.1375	0.1375	0.1375
ENSG00000254895	MTCO3P15	0.1375	0.1375	0.1375	0.1375	0.1375	0.1375	0.1375	0.1375	0.1375	0.1375	0.1375	0.1375	0.1375	0.1375
ENSG00000259180	AC012378.1	0.1375	0.1375	0.1375	0.1375	0.1375	0.1375	0.1375	0.1375	0.1375	0.1375	0.1375	0.1375	0.1375	0.1375
ENSG00000137038	DMAC1	0.537	0.4738	0.641	0.449	0.6941	0.7911	2.3623	1.6094	3.5515	3.3138	0.7946	0.8705	2.3518	3.028
ENSG00000250111	AC107982.1	0.1652	0.1375	0.1375	0.1375	0.1375	0.1375	0.1375	0.1375	0.1375	0.1375	0.1631	0.1375	0.1375	0.1375
ENSG00000231667	OR7E111P	0.1375	0.1375	0.1375	0.1375	0.1375	0.1375	0.1375	0.1375	0.1375	0.1375	0.1375	0.1375	0.1375	0.1375
ENSG00000241152	RN7SL720P	0.1375	0.1375	0.1375	0.1375	0.1375	0.1375	0.1375	0.1375	0.1375	0.1375	0.1375	0.1375	0.1375	0.1375
ENSG00000254655	AP004607.1	0.1375	0.1375	0.1375	0.1375	0.1375	0.1375	0.1375	0.1375	0.1375	0.1375	0.1375	0.1375	0.1375	0.1375
ENSG00000238578	SNORD4A	1.2727	1.7632	0.1375	1.4079	0.1375	0.5024	1.2829	1.8976	1.5559	1.4464	0.8	0.7897	1.1972	0.1375
ENSG00000249006	AL136360.1	0.1375	0.2408	0.1375	0.1375	0.1375	0.1375	0.1843	0.1375	0.1375	0.1375	0.1375	0.1375	0.1375	0.1375
ENSG00000095321	CRAT	0.7152	1.0845	1.1465	0.7787	1.3001	1.3892	3.4811	3.7157	1.7174	0.5872	3.1386	3.9872	1.9302	2.2849
ENSG00000227124	ZNF717	0.2635	0.1743	0.1375	0.1846	0.3354	0.2102	1.8952	1.3592	3.559	2.179	0.7349	0.6822	1.245	0.1375
ENSG00000250322	AC026402.1	0.1375	0.1375	0.1375	0.1375	0.1375	0.1375	0.1375	0.1375	0.1375	0.1375	0.1375	0.1375	0.1375	0.1375
ENSG00000136634	IL10	3.6282	3.964	3.9524	3.8279	1.7511	1.3051	4.6177	5.0505	2.6028	3.368	4.5654	4.9162	4.6896	0.1375
ENSG00000189433	GJB4	0.1375	0.1375	0.1375	0.1375	0.1375	0.1375	0.7861	0.5598	2.5012	2.0773	0.1375	0.1375	0.1375	0.1375
ENSG00000164405	UQCRQ	3.2049	3.2448	3.0523	3.2109	3.6262	2.6557	4.266	3.5992	5.0775	5.0875	3.4598	3.2875	4.8354	5.1072
ENSG00000280436	CR392039.5	0.1375	0.1375	0.1375	0.1375	0.1375	0.1375	0.1375	0.1375	0.1375	0.1375	0.1375	0.1375	0.1375	0.1375
ENSG00000270141	TERC	0.635	1.0468	0.4323	0.5468	0.1375	0.6591	1.0646	1.1091	0.4809	1.1257	1.5198	1.3414	0.1375	1.6441
ENSG00000140092	FBLN5	0.2712	0.204	0.1375	0.2054	0.3165	0.1766	1.8486	3.0617	3.2109	2.1711	0.4311	0.2061	1.014	0.1375
ENSG00000284726	AL109936.8	0.1375	0.1375	0.1375	0.1375	0.1375	0.1375	0.1375	0.2299	0.1375	0.1375	0.1375	0.1375	0.1375	0.1375
ENSG00000284570	MIR7705	0.3703	0.5529	0.4324	0.4421	0.3885	0.3567	0.3838	0.5907	0.597	1.0323	0.3451	0.7273	1.3953	2.7402
ENSG00000217646	HIST1H2BPS2	1.3316	0.7408	0.3176	0.2852	0.1375	0.7105	0.7727	0.2689	0.341	0.1375	0.6164	0.6328	0.1375	0.1375
ENSG00000198783	ZNF830	2.1011	2.6793	1.4082	1.5001	1.3397	1.2415	2.9187	3.1642	2.2475	1.3108	2.292	2.8149	1.7934	0.9609
ENSG00000207583	MIR606	2.659	2.2397	2.2197	2.9435	2.1122	2.1829	3.325	3.9874	2.7899	2.7846	3.6347	3.9676	3.9196	3.3246
ENSG00000207839	MIR33B	1.1793	1.5343	2.6695	1.8063	1.7639	0.6225	1.6048	2.3159	1.6967	1.1555	1.6947	2.4731	3.207	3.5021
ENSG00000275830	AL355974.2	0.1375	0.1375	0.1375	0.1375	0.1375	0.1375	0.1375	0.1375	0.1375	0.1375	0.1375	0.1375	0.1375	0.1375
ENSG00000197768	STPG3	0.7673	1.7698	1.1846	0.7384	0.3509	0.2044	1.7095	1.5589	0.1375	1.0397	0.3411	1.0208	0.1375	0.1375
ENSG00000210191	MT-TL2	7.3336	7.2178	5.827	5.7197	6.5424	6.7235	6.3184	5.2687	5.188	5.8714	6.4089	4.8042	5.6118	6.7719
ENSG00000145332	KLHL8	1.1692	1.6469	1.1946	1.3217	1.718	1.9756	1.6732	1.5997	3.3454	1.886	1.0677	1.0611	1.6928	2.1498
ENSG00000206845	RNU6-209P	0.1375	0.1375	0.1375	0.1375	0.1375	0.1375	0.1375	0.1375	0.1375	0.1375	0.1375	0.1375	0.1375	0.1375
ENSG00000254205	AC009686.1	0.1375	0.1375	0.1375	0.1375	0.1375	0.1375	0.4134	0.1375	0.1375	0.1375	0.1375	0.1375	0.1375	0.1375
ENSG00000250751	AC015795.2	0.1375	0.5338	0.1375	0.1375	0.2143	0.1375	0.3597	0.1375	0.1375	0.1375	0.2131	0.1375	0.1375	0.1375
ENSG00000189362	NEMP2	0.7334	0.7741	0.5331	0.6126	0.3928	0.3918	1.5023	1.3808	0.7713	0.467	1.0035	0.7681	0.2488	0.1375
ENSG00000126561	STAT5A	5.7449	6.7807	6.3841	6.3399	5.7772	6.0182	5.8789	6.5915	5.2696	5.9008	6.2742	6.9667	5.1991	5.726
ENSG00000055044	NOP58	3.3281	3.7582	2.8912	3.4971	2.1869	1.8825	4.5953	4.2041	4.4708	4.0562	4.066	4.0807	4.1764	3.3449
ENSG00000159267	HLCS	0.4069	0.3876	0.6025	0.6476	0.3377	0.7046	1.9091	1.9856	2.8675	2.5372	1.5641	1.2474	2.068	0.1375
ENSG00000123159	GIPC1	1.8051	2.4406	2.1051	2.6998	2.2268	1.7337	4.6075	5.2422	4.888	5.3779	2.7183	2.8011	3.2468	6.5577
ENSG00000182667	NTM	0.1375	0.1375	0.1375	0.1375	0.1375	0.1375	0.2328	0.1375	0.1375	0.1375	0.1375	0.1375	0.1375	0.1375
ENSG00000172795	DCP2	3.5818	3.7801	3.606	3.9776	4.0577	4.1836	3.7895	3.8303	4.2576	4.656	4.3523	4.9736	4.6955	5.3992
ENSG00000266647	AC053481.4	0.1375	0.1375	0.1375	0.1375	0.1375	0.1375	0.1375	0.1375	0.1375	0.1375	0.1375	0.1375	0.1375	0.1375
ENSG00000170409	AC091390.1	0.1375	0.1375	0.1375	0.1375	0.1375	0.1375	0.1375	0.1375	0.1375	0.1375	0.1375	0.1375	0.1375	0.1375
ENSG00000136869	TLR4	5.8857	5.8075	6.2797	6.6236	6.9726	7.0105	5.2441	6.0937	5.5509	6.2217	6.1556	6.4244	6.1218	5.5421
ENSG00000152234	ATP5A1	3.1856	4.1508	3.6377	3.6006	3.7032	3.1855	5.1253	5.8866	5.5618	5.125	4.3509	5.0898	4.3599	6.6704
ENSG00000182831	C16orf72	5.5001	5.8858	5.2275	5.0891	6.324	6.1999	5.5357	6.0438	5.7249	6.4756	4.9257	5.606	5.7827	6.6105
ENSG00000227291	AC092170.1	0.1375	0.1375	0.1375	0.1375	0.1375	0.1375	0.1375	0.1375	0.1375	0.1375	0.1375	0.1375	0.1375	0.1375
ENSG00000228060	AL365277.2	0.1375	0.1375	0.1375	0.1375	0.1375	0.1375	0.1375	0.1375	0.1375	0.1375	0.1375	0.1375	0.1375	0.1375
ENSG00000240405	SAMMSON	0.3768	0.1375	0.1375	0.2901	0.1375	0.1375	0.1929	0.2361	0.2028	0.1375	0.2998	0.4236	0.1375	0.1375
ENSG00000218643	RPL5P20	0.1375	0.1375	0.1375	0.1375	0.1375	0.1375	0.1375	0.1375	0.1375	0.1375	0.1375	0.1375	0.1375	0.1375
ENSG00000226420	IGLV3-4	0.1375	0.1375	0.1375	0.1375	0.1375	0.1375	0.1375	0.1375	0.1375	0.1375	0.1375	0.1375	0.1375	0.1375
ENSG00000163218	PGLYRP4	0.1375	0.1375	0.1375	0.1863	0.2288	0.1375	0.2433	0.5707	0.1375	0.1375	0.1375	0.1375	0.1375	0.1375
ENSG00000254407	PHBP17	0.1375	0.1375	0.1375	0.1375	0.1375	0.1375	0.1375	0.1375	0.1375	0.1375	0.1375	0.1375	0.1375	0.1375
ENSG00000225921	NOL7	3.2477	4.1954	3.4957	2.9523	3.6808	3.4443	5.2228	5.6053	4.4904	4.6841	4.8111	5.3349	4.3134	4.4189
ENSG00000263361	MIR378H	0.53	0.9416	0.6958	0.1375	0.3599	0.1375	0.5116	0.317	0.1375	0.1375	0.4774	0.1375	0.1375	0.1375
ENSG00000187912	CLEC17A	0.6629	1.0787	0.7866	1.0229	0.1989	0.1565	0.4631	0.3624	0.379	0.4897	0.2328	0.3531	2.0052	0.1375
ENSG00000248184	LINC02283	0.1375	0.1375	0.1375	0.1375	0.1375	0.1375	0.1375	0.1375	0.1375	0.1375	0.1375	0.1375	0.1375	0.1375
ENSG00000248572	EGFLAM-AS2	0.1375	0.1375	0.1375	0.1375	0.1375	0.1375	0.1375	0.1375	0.1375	0.1375	0.1375	0.1375	0.1375	0.1375
ENSG00000102230	PCYT1B	0.2068	0.3192	0.1375	0.1375	0.1375	0.1935	1.2343	0.7417	3.1268	1.6592	0.1375	0.1375	0.1375	0.1375
ENSG00000079999	KEAP1	3.1715	4.0296	2.1234	2.1396	2.3954	2.2858	4.4563	4.6847	4.9606	4.9451	3.9989	4.5823	4.2435	4.7359
ENSG00000169668	BCRP2	0.1375	0.1375	0.1375	0.1375	0.1375	0.1375	0.1375	0.1375	0.1375	0.1375	0.1375	0.1375	0.1375	0.1375
ENSG00000222042	AP001341.1	0.1375	0.1375	0.1375	0.1375	0.1375	0.1375	0.1375	0.1375	0.1375	0.1375	0.1375	0.1375	0.1375	0.1375
ENSG00000185950	IRS2	7.1606	7.9204	6.5392	7.0404	5.937	6.1365	5.0921	6.4845	6.0755	5.5644	5.9099	6.6663	6.677	6.2477
ENSG00000243849	CFAP44-AS1	0.1375	0.1375	0.1375	0.1375	0.1375	0.1375	0.1375	0.1375	0.1375	0.1375	0.1375	0.1375	0.1375	0.1375
ENSG00000215218	UBE2QL1	0.1532	0.2002	0.1375	0.1375	0.1375	0.1375	0.1582	0.1375	0.1375	0.1375	0.1607	0.1375	0.1375	0.1375
ENSG00000276449	AC004076.2	0.1788	0.1803	0.1375	0.2359	0.1375	0.1375	0.2162	0.211	0.2894	0.3031	0.1756	0.1375	0.3428	0.1375
ENSG00000226764	AC010145.1	0.1375	0.1375	0.1375	0.1375	0.1375	0.1375	0.1375	0.1375	0.1375	0.1375	0.1375	0.1375	0.1375	0.1375
ENSG00000184117	NIPSNAP1	0.4182	1.1025	0.5683	0.7034	0.7651	0.7964	1.4698	1.5513	0.7324	0.5801	0.853	0.7904	0.3602	2.168
ENSG00000251395	FTH1P9	0.1375	0.1375	0.1375	0.1375	0.1375	0.1375	0.1375	0.1375	0.1375	0.1375	0.1375	0.1375	0.1375	0.1375
ENSG00000215771	LRRC37A14P	0.1375	0.1375	0.1375	0.1375	0.1375	0.1375	0.4114	0.6943	1.8408	1.0355	0.1375	0.1375	0.1375	1.6651
ENSG00000260889	CKBP1	0.1375	0.1375	0.1375	0.1375	0.1375	0.1375	0.1375	0.1375	0.1375	0.1375	0.1375	0.1375	0.1375	0.1375
ENSG00000263456	MIR5189	0.4482	0.6627	0.5845	0.3921	0.1375	0.1375	2.7772	2.6357	0.1375	0.1375	1.3792	1.3767	0.1375	0.1375
ENSG00000257848	AC074029.1	0.1375	0.1375	0.1375	0.1375	0.1375	0.1375	0.1375	0.1375	0.1375	0.1375	0.1375	0.1375	0.1375	0.1375
ENSG00000179057	IGSF22	0.1558	0.1375	0.1375	0.1375	0.1375	0.1375	0.1801	0.1375	0.5403	0.1375	0.1606	0.1375	0.1375	0.1375
ENSG00000178201	VN1R1	0.1751	0.1508	0.235	0.1422	0.1756	0.1375	0.1375	0.1375	0.1458	0.1375	0.1672	0.1375	0.1375	0.1375
ENSG00000222932	RNU6-172P	0.1375	1.5552	0.6688	0.5615	0.4201	0.9978	1.3941	0.7382	0.8539	1.975	1.3642	1.6162	0.1375	0.1375
ENSG00000213041	AC093422.1	0.1375	0.1375	0.1375	0.1375	0.1375	0.1375	0.1375	0.1375	0.1375	0.1375	0.1375	0.1375	0.1375	0.1375
ENSG00000248484	AC113391.1	0.1375	0.1375	0.1375	0.1375	0.1375	0.1375	0.1375	0.1375	0.1375	0.1375	0.1375	0.1375	0.1375	0.1375
ENSG00000257084	MIR200CHG	1.233	0.8478	0.1375	1.1006	1.3124	0.7703	2.9754	0.1375	3.8263	2.5438	1.6986	0.6667	2.7542	2.7076
ENSG00000178429	RPS3AP5	0.2307	0.4175	0.1375	0.1375	0.1375	0.1375	0.3438	0.3948	0.3439	0.6478	0.5894	0.1375	0.1375	0.1375
ENSG00000251920	RNA5SP216	0.1375	0.1375	0.1375	0.1375	0.1375	0.1375	0.1375	0.1375	0.1375	0.1375	0.1375	0.1375	0.1375	0.1375
ENSG00000070367	EXOC5	2.2768	2.0873	1.9296	2.2672	2.4826	2.4386	3.2181	3.0867	3.3679	2.4201	3.031	3.2907	3.9894	0.7157
ENSG00000177335	C8orf31	0.1375	0.1375	0.1375	0.1375	0.2083	0.2583	0.2863	0.2542	0.1375	0.1375	0.8845	0.7625	0.1375	0.1375
ENSG00000202100	Y_RNA	0.1375	0.1375	0.1375	0.1375	0.1375	0.1375	0.1375	0.1375	0.1375	0.1375	0.1375	0.1375	0.1375	0.1375
ENSG00000255070	OSBPL9P3	0.1375	0.1375	0.1375	0.1375	0.1375	0.1375	0.1375	0.1375	0.1375	0.1375	0.1375	0.1375	0.1375	0.1375
ENSG00000253786	IGLV3-15	0.1375	0.1375	0.1375	0.1375	0.1375	0.1375	0.1375	0.1375	0.1375	0.1375	0.1375	0.4554	0.1375	0.1375
ENSG00000243905	RN7SL679P	0.1375	0.3574	0.1375	0.1375	0.1375	0.1375	0.1375	0.1375	0.1375	0.1375	0.1375	0.1375	0.1375	0.1375
ENSG00000124613	ZNF391	0.1375	0.1375	0.1375	0.1375	0.1597	0.1375	1.3028	1.9101	3.3299	1.8435	0.1536	0.1375	0.3058	0.1375
ENSG00000224653	AC023141.3	0.1375	0.1375	0.1375	0.1375	0.1375	0.1375	0.1375	0.1375	0.1375	0.1375	0.1375	0.1375	0.1375	0.1375
ENSG00000224192	AL080273.1	0.1375	0.1375	0.1375	0.1375	0.1375	0.1375	0.1375	0.1375	0.1375	0.1375	0.1375	0.1375	0.1375	0.1375
ENSG00000229028	KRT223P	0.1375	0.1375	0.1375	0.1375	0.1375	0.1375	0.1375	0.1375	0.1375	0.1375	0.1375	0.1375	0.1375	0.1375
ENSG00000241553	ARPC4	6.3796	6.774	6.2394	6.5092	7.1729	7.3677	6.2589	6.9078	6.6282	6.3359	6.4257	7.1352	6.81	7.2823
ENSG00000274688	AL591926.1	0.1375	0.1375	0.1375	0.1375	0.1375	0.1375	0.1375	0.1375	0.1375	0.1375	0.1375	0.1375	0.1375	0.1375
ENSG00000260706	AC022166.1	0.1375	0.1375	0.1375	0.1375	0.1375	0.1375	0.1375	0.1375	0.1375	0.1375	0.1375	0.1375	0.1375	0.1375
ENSG00000261546	AC135782.3	1.1032	1.2615	0.2468	0.3926	0.2766	0.4366	0.5683	1.0417	0.9593	0.1375	0.3393	0.2172	0.1375	0.1375
ENSG00000258600	AL359238.1	0.1375	0.1375	0.1375	0.1375	0.1375	0.1375	0.1375	0.1375	0.1375	0.1375	0.1375	0.1375	0.1375	0.1375
ENSG00000154479	CCDC173	0.6026	0.3337	0.1375	0.3865	0.1375	0.223	2.2834	2.2416	4.6181	2.8839	0.1773	0.1375	0.1375	0.1375
ENSG00000232688	LINC01628	0.1375	0.1375	0.1375	0.1375	0.1375	0.1375	0.1375	0.1375	0.1375	0.1375	0.1375	0.1375	0.1375	0.1375
ENSG00000207081	RNU6-616P	0.1375	0.1375	0.1375	0.1375	0.1375	0.1375	0.1375	0.1375	0.1375	0.1375	0.1375	0.1375	0.1375	0.1375
ENSG00000240086	AC128689.1	0.1375	0.1375	0.1375	0.1375	0.1375	0.1375	0.1375	0.1375	0.1375	0.1375	0.1375	0.1375	0.1375	0.1375
ENSG00000151468	CCDC3	0.1375	0.2093	0.1375	0.1375	0.1375	0.1375	0.1756	0.1375	0.2734	0.1375	0.1375	0.1607	0.1375	0.1375
ENSG00000226334	AL359182.1	0.9998	1.694	1.3458	1.8697	1.1467	0.9599	0.939	2.196	0.9194	0.9343	1.1258	1.911	0.1375	0.1375
ENSG00000252041	RNA5SP228	0.1375	0.1375	0.1375	0.1375	0.1375	0.1375	0.1375	0.1375	0.1375	0.1375	0.1375	0.1375	0.1375	0.1375
ENSG00000168631	DPCR1	0.1375	0.1375	0.1585	0.1375	0.1375	0.1375	0.1861	0.1375	0.1375	0.1375	0.1729	0.1375	0.1375	0.1375
ENSG00000213700	RPL17P50	2.178	2.4173	3.0329	3.0242	1.3935	1.2126	1.3806	0.7262	3.0225	0.83	1.4153	1.7829	0.1375	0.1375
ENSG00000207688	MIR548AA2	0.9756	1.0188	1.1534	0.3842	0.925	0.1375	0.359	0.1375	0.5062	0.1375	0.1999	0.1375	0.1375	0.1375
ENSG00000105928	GSDME	2.7088	3.1568	1.9278	1.6302	0.7583	0.8159	3.7455	5.0078	0.7174	0.7957	3.4652	3.7885	3.3029	0.1375
ENSG00000265375	MIR4679-2	0.1375	0.1375	0.1375	0.1375	0.1375	0.1375	0.1375	0.1375	0.1375	0.1375	0.1375	0.1375	0.1375	0.1375
ENSG00000244245	AC133134.1	0.1375	0.1375	0.1375	0.1375	0.1375	0.1375	0.1375	0.1375	0.1375	0.1375	0.1375	0.4635	0.1375	0.1375
ENSG00000225378	AC015977.2	0.1375	0.1375	0.1375	0.1375	0.1375	0.1375	0.1375	0.1375	0.1375	0.1375	0.1375	0.1375	0.1375	0.1375
ENSG00000279557	AC010435.1	0.2651	0.1375	0.1375	0.1375	0.2793	0.2148	0.3661	0.1375	0.1375	0.1375	0.2466	0.1375	0.1375	0.1375
ENSG00000228587	AL049748.1	0.1375	0.1375	0.1375	0.1375	0.1375	0.1375	0.5365	0.5337	0.1375	0.1375	0.8869	0.8029	0.1375	0.1375
ENSG00000240583	AQP1	0.1375	0.1859	0.1375	0.1375	0.1375	0.1375	0.3019	0.496	1.1841	1.2093	0.1375	0.1375	0.1375	1.2714
ENSG00000221200	MIR1253	0.1375	0.1375	0.1375	0.1375	0.1375	0.1375	0.1375	0.1375	0.1375	0.1375	0.1375	0.1375	0.1375	0.1375
ENSG00000237433	RPSAP11	0.1375	0.2928	0.1375	0.1375	0.1375	0.1375	0.2204	0.1375	0.499	1.9743	0.1375	0.2279	0.1375	0.1375
ENSG00000114654	EFCC1	0.1666	0.2833	0.3422	0.1888	0.1375	0.1375	0.24	0.1375	0.1375	0.5121	0.1375	0.1375	0.1375	0.1375
ENSG00000170270	GON7	1.53	1.8571	1.2036	1.0417	1.1838	1.1979	2.9891	2.3509	5.8045	4.2879	1.4048	1.4317	2.1728	0.1375
ENSG00000280123	AC023632.6	0.1375	0.1375	0.1788	0.1375	0.2389	0.181	0.2594	0.1375	0.406	0.1375	0.1528	0.2146	0.1375	0.1375
ENSG00000188215	DCUN1D3	5.2566	5.6183	5.6592	5.5252	5.2157	5.443	4.8966	5.3249	4.4652	4.8498	5.2107	5.7261	4.481	4.9256
ENSG00000223756	TSSC2	0.1375	0.1375	0.1375	0.1375	0.1375	0.1375	0.2059	0.3918	0.1375	0.1375	0.1658	0.1375	0.6343	0.1375
ENSG00000215454	KRTAP10-4	0.1375	0.2223	0.1375	0.2009	0.1375	0.1375	0.1375	0.1375	0.1375	0.1375	0.177	0.1375	0.1375	0.1375
ENSG00000250961	AC025470.2	0.1375	0.1375	0.1375	0.1375	0.1375	0.1375	0.3304	0.1375	0.1375	0.1375	0.1375	0.1375	0.1375	0.1375
ENSG00000283249	U6	0.1375	0.1375	0.1375	0.1375	0.1375	0.1375	0.1375	0.1375	0.1375	0.1375	0.1375	0.1375	0.1375	0.1375
ENSG00000237552	LINC02567	0.1375	0.1375	0.1375	0.1375	0.1375	0.1375	0.1375	0.1375	0.1375	0.1375	0.1375	0.1375	0.1375	0.1375
ENSG00000252119	ACA64	0.1375	0.1375	0.1375	0.1375	0.1375	0.1375	0.1375	0.1375	0.1375	0.1375	0.1375	0.1375	0.1375	0.1375
ENSG00000229598	PRDX3P1	1.0026	1.024	0.2834	0.6663	0.2444	0.1375	0.2403	0.4054	0.5488	0.1375	0.2633	0.1375	0.1375	0.1375
ENSG00000280709	LINC02203	0.1375	0.1375	0.1375	0.1375	0.1375	0.1375	0.1375	0.1375	0.1375	0.1375	0.1375	0.1375	0.1375	0.1375
ENSG00000185986	SDHAP3	0.9463	0.9211	0.8296	0.8246	0.7223	1.3046	1.528	2.3266	0.8731	0.6767	1.4761	0.9723	0.1375	0.1375
ENSG00000215399	HMGB3P7	0.1375	0.1375	0.1375	0.1375	0.1375	0.1375	0.1375	0.1375	0.1375	0.1375	0.1375	0.1375	0.1375	0.1375
ENSG00000207347	RNU6-306P	0.1375	0.1375	0.1375	0.1375	0.1375	0.1375	0.1375	0.1375	0.1375	0.1375	0.1375	0.1375	0.1375	0.1375
ENSG00000253160	AC105185.1	0.1375	0.1375	0.1375	0.1375	0.1375	0.1375	0.1375	0.1375	0.1375	0.1375	0.1375	0.1375	0.1375	0.1375
ENSG00000187474	FPR3	3.8076	3.5908	4.045	3.8535	3.3884	2.8773	2.9503	4.1208	2.126	4.5029	5.2783	5.2088	6.143	3.2954
ENSG00000160753	RUSC1	1.4098	2.0571	1.211	0.9095	1.665	1.9887	3.8402	4.1535	2.1169	1.9361	3.3905	4.0215	2.6423	3.9136
ENSG00000176054	RPL23P2	0.2109	0.1375	0.1375	0.1375	0.1375	0.1375	0.2425	0.5141	0.6695	0.1375	0.1375	0.1375	0.815	0.1375
ENSG00000264066	AC024267.1	0.3261	0.2069	0.2636	0.4581	0.7204	0.181	0.3082	0.3078	0.2974	0.1375	0.2338	0.1375	0.1375	0.1375
ENSG00000213291	AC010099.1	0.1375	0.1375	0.1375	0.1375	0.1375	0.1375	0.1375	0.1375	0.1375	0.1375	0.1375	0.1375	0.1375	0.1375
ENSG00000164176	EDIL3	0.1375	0.1375	0.1375	0.1375	0.1375	0.1375	0.1375	0.1639	0.1375	0.1375	0.1375	0.1375	0.1375	0.1375
ENSG00000255092	AC010768.2	0.1375	0.1375	0.1375	0.1375	0.1375	0.3972	0.1375	0.1375	0.1375	0.1375	0.1375	0.1375	0.1375	0.1375
ENSG00000221420	SNORA81	0.2528	0.2994	0.2908	0.2968	0.1385	0.1378	0.1567	0.1384	0.203	0.1505	0.2267	0.3742	0.1547	5.0507
ENSG00000095370	SH2D3C	3.8749	4.3995	4.006	4.3842	5.7178	6.0928	3.9062	5.1509	4.8103	3.7816	3.5912	4.0984	3.879	5.3428
ENSG00000199476	Y_RNA	0.1375	0.1375	0.1375	0.1375	0.1375	0.1375	0.1375	0.1375	0.1375	0.1375	0.1375	0.1375	0.1375	0.1375
ENSG00000185480	PARPBP	0.2951	0.4065	0.3545	0.2238	0.2627	0.1995	0.5171	0.7302	0.494	0.1375	0.4041	0.3469	0.807	0.1375
ENSG00000268475	AC011462.2	0.4273	1.5416	0.1375	0.1375	0.1375	0.5153	0.1375	1.2512	0.1375	0.1375	0.4992	1.4529	0.1375	0.1375
ENSG00000183542	KLRC4	0.5878	0.8524	0.3176	0.1375	0.927	0.9764	2.5608	0.1375	0.1375	0.1375	2.2046	2.0223	1.4768	0.1375
ENSG00000222613	Y_RNA	0.1375	0.1375	0.1375	0.1375	0.1375	0.1375	0.1375	0.1375	0.1375	0.1375	0.1375	0.1375	0.1375	0.1375
ENSG00000186310	NAP1L3	0.1671	0.1912	0.1821	0.2155	0.1715	0.203	0.2712	0.1842	0.2041	0.1375	0.1375	0.1375	0.1375	0.1375
ENSG00000280028	AC007431.3	0.9617	1.4242	0.3684	0.7484	0.4487	0.383	1.7647	2.7505	0.4152	0.1375	1.3215	1.9396	0.9643	0.1375
ENSG00000253697	AC103834.1	0.1375	0.1375	0.1375	0.1375	0.1375	0.1375	0.1375	0.1375	0.1375	0.1375	0.1375	0.1375	0.1375	0.1375
ENSG00000258027	NF1P4	0.1375	0.1375	0.1375	0.1375	0.1375	0.1375	0.1375	0.1375	0.1375	0.1375	0.1375	0.1375	0.1375	0.1375
ENSG00000283923	MIR6132	0.2991	0.5224	0.1375	0.3847	0.2636	0.5242	0.5517	0.3352	0.1375	1.8302	0.3929	0.4857	0.1375	0.1375
ENSG00000206709	RNU6-1080P	0.1375	0.1375	0.1375	0.1375	0.1375	0.1375	0.1375	0.1375	0.1375	0.1375	0.1375	0.1375	0.1375	0.1375
ENSG00000278922	AC002310.6	0.3863	0.3773	0.3008	0.1375	0.1893	0.5918	0.5393	0.7278	0.4353	0.1375	0.5473	0.1375	0.1375	0.1375
ENSG00000229138	CDY6P	0.1375	0.1375	0.1375	0.1375	0.1375	0.1375	0.1375	0.1375	0.1375	0.1375	0.1375	0.1375	0.1375	0.1375
ENSG00000071203	MS4A12	0.1375	0.1375	0.1375	0.1375	0.1375	0.1375	0.1375	0.1375	0.1375	0.1375	0.1375	0.1375	0.1375	0.1375
ENSG00000260492	CISTR	0.1375	0.1375	0.1375	0.1375	0.1375	0.1375	0.1375	0.1375	0.1375	0.1375	0.1375	0.1375	0.1375	0.1375
ENSG00000257586	AC018448.2	0.1375	0.1375	0.1375	0.1375	0.1375	0.1375	0.1375	0.1375	0.1375	0.1375	0.1375	0.1375	0.1375	0.1375
ENSG00000207026	RNU6-472P	0.1375	0.1375	0.1375	0.1375	0.1375	0.1375	0.1375	0.1375	0.1375	0.1375	0.1375	0.1375	0.1375	0.1375
ENSG00000229968	AL022578.1	0.1375	0.1375	0.1375	0.1375	0.1375	0.1375	0.1375	0.1375	0.1375	0.1375	0.1375	0.1375	0.1375	0.1375
ENSG00000197442	MAP3K5	4.1068	4.3728	4.0479	3.7921	4.025	3.9634	4.5048	4.8046	4.123	4.0577	3.8024	4.1224	3.8236	4.5572
ENSG00000198740	ZNF652	2.5087	2.6697	2.8013	2.6261	3.289	2.8309	3.6053	3.6167	4.5061	2.7356	1.8789	2.1155	3.2382	4.4677
ENSG00000037965	HOXC8	0.1375	0.1375	0.1375	0.1375	0.1375	0.1375	0.1375	0.1375	0.1375	0.1375	0.1375	0.1375	0.1375	0.1375
ENSG00000277566	AC089999.3	0.2044	0.2575	0.7885	0.1375	0.1375	0.296	0.325	0.4346	0.1375	0.5708	0.1535	0.1375	0.1375	0.1375
ENSG00000215148	PRSS41	0.1375	0.1375	0.1375	0.1375	0.1375	0.1375	0.1375	0.1375	0.1375	0.1375	0.1375	0.1375	0.1375	0.1375
ENSG00000164061	BSN	0.1523	0.1707	0.1375	0.1375	0.1375	0.1375	0.2529	0.2443	0.2522	0.1734	0.1542	0.3711	0.2266	0.1375
ENSG00000254933	AP000785.1	0.1375	0.1375	0.1375	0.1375	0.1375	0.1375	0.1375	0.1375	0.1375	0.1375	0.1375	0.1375	0.1375	0.1375
ENSG00000236999	ATP2B2-IT1	0.1375	0.1375	0.1375	0.1375	0.1375	0.1375	0.1375	0.1375	0.1375	0.1375	0.1375	0.1375	0.1375	0.1375
ENSG00000266421	MIR4451	1.3928	0.3262	0.7726	1.4357	0.9287	1.6953	0.8186	2.0822	0.9491	0.1375	2.4406	1.8345	0.1375	0.1375
ENSG00000171596	NMUR1	0.1375	0.2225	0.1375	0.2323	0.1651	0.1665	0.3625	0.4471	0.1375	0.1375	0.2103	0.2378	0.1375	0.1375
ENSG00000255312	OR4C7P	0.1375	0.1375	0.1375	0.1375	0.1375	0.1375	0.1375	0.1375	0.1375	0.1375	0.1375	0.1375	0.1375	0.1375
ENSG00000233464	NANOGP11	0.1375	0.1375	0.1375	0.1375	0.1375	0.1375	0.1375	0.1375	0.1375	0.1375	0.1375	0.1375	0.1375	0.1375
ENSG00000249359	AC093274.1	0.1375	0.1375	0.1375	0.1375	0.1375	0.1375	0.1375	0.1375	0.1375	0.1375	0.1375	0.1375	0.1375	0.1375
ENSG00000100665	SERPINA4	0.1375	0.1375	0.1375	0.1375	0.1375	0.1375	0.1375	0.1375	0.1375	0.1375	0.1634	0.1375	0.1375	0.1375
ENSG00000272576	AC027271.1	0.4803	0.2556	0.1375	0.1375	0.3406	0.1375	0.1375	0.1375	0.4073	0.1375	0.2984	0.1375	0.1375	0.1375
ENSG00000234296	AL390961.2	0.1375	0.1375	0.1375	0.1375	0.1375	0.4751	0.1375	0.1375	0.1375	0.1375	0.1375	0.1375	0.1375	0.1375
ENSG00000235232	MRPS18BP2	0.1375	0.1375	0.1375	0.1375	0.1375	0.1375	0.1375	0.1375	0.1375	0.1375	0.1375	0.1375	0.1375	0.1375
ENSG00000215349	MRPL3P1	0.1375	0.1375	0.1375	0.1375	0.1375	0.1375	0.1375	0.1375	0.1375	0.1375	0.1375	0.1375	0.1375	0.1375
ENSG00000263797	AP005210.1	0.1375	0.1375	0.1375	0.1375	0.1375	0.1375	0.1375	0.1375	0.1375	0.1375	0.1375	0.1375	0.1375	0.1375
ENSG00000187682	ERAS	0.1375	0.1375	0.1375	0.1375	0.1375	0.1375	0.1375	0.1375	0.1375	0.1375	0.1896	0.1375	0.1375	0.1375
ENSG00000225066	Z93929.1	0.1375	0.1375	0.1375	0.1375	0.1375	0.1375	0.1375	0.1375	0.1375	0.1375	0.1375	0.1375	0.1375	0.1375
ENSG00000155506	LARP1	3.8325	4.6266	3.7661	3.4463	4.0523	3.9324	5.5165	6.3967	5.1986	5.2906	5.4424	6.2329	5.4628	5.3616
ENSG00000271498	AL360085.1	0.1375	0.1375	0.1375	0.1375	0.1375	0.1375	0.1375	0.1375	0.1375	0.1375	0.1375	0.1375	0.1375	0.1375
ENSG00000092421	SEMA6A	0.4913	0.54	0.5508	0.3795	0.1375	0.1375	0.3413	0.1912	1.122	0.2194	0.1472	0.1375	0.1375	0.1375
ENSG00000249893	MTND6P16	0.1375	0.1375	0.1375	0.1375	0.1375	0.1375	0.1375	0.1375	0.1375	0.1375	0.1375	0.1375	0.1375	0.1375
ENSG00000198752	CDC42BPB	2.4648	3.1477	2.1694	2.1953	1.9257	2.0272	3.6477	4.5924	4.0877	4.6387	3.7044	4.4009	4.9249	4.6247
ENSG00000130612	CYP2G1P	0.3232	0.3985	0.4646	0.3217	0.2402	0.1748	0.386	0.2759	0.5938	0.1375	0.1505	0.2041	0.1375	1.7405
ENSG00000082512	TRAF5	2.4228	2.984	1.2973	1.4493	1.5012	1.587	3.6576	3.6116	1.3525	1.665	2.803	3.2512	3.6464	0.6558
ENSG00000228797	FAM207BP	0.1375	0.1375	0.1375	0.1375	0.1375	0.1375	0.1375	0.4592	0.1375	0.1375	0.1375	0.1375	0.1375	0.1375
ENSG00000277952	AC092745.3	0.1375	0.1375	0.1375	0.1375	0.1375	0.1375	0.1375	0.1375	0.7335	0.1375	0.1375	0.1375	0.1375	0.1375
ENSG00000230300	STARD13-IT1	0.286	0.5581	0.1375	0.1375	0.625	0.8759	0.7325	0.6576	0.1375	0.1375	0.3244	0.1375	0.1375	0.1375
ENSG00000121274	PAPD5	1.7148	1.7019	1.4136	1.7111	1.5068	1.2462	2.229	2.3943	3.8648	3.1255	3.9737	4.3728	2.84	1.5618
ENSG00000259569	AC013489.2	0.1375	0.1375	0.1375	0.1375	0.1375	0.1375	0.1375	0.1375	0.1375	0.1375	0.1375	0.1375	0.1375	0.1375
ENSG00000140006	WDR89	0.5497	0.6266	0.7039	0.4243	0.4066	0.3499	1.0602	0.9676	1.9962	1.8071	0.4995	0.3302	0.9048	1.8824
ENSG00000100053	CRYBB3	0.1375	0.1375	0.1375	0.1375	0.1375	0.1375	0.2815	0.1375	0.5854	0.1375	0.1375	0.1375	0.1375	0.1375
ENSG00000239674	Z83839.2	0.1375	0.1375	0.1375	0.1375	0.1375	0.1375	0.1375	0.1375	0.1375	0.1375	0.1375	0.1375	0.1375	0.1375
ENSG00000116652	DLEU2L	0.3992	0.4285	1.3643	1.1438	0.4307	0.5993	0.5101	0.3668	0.3722	0.1375	0.4656	0.4421	0.3266	0.1375
ENSG00000116991	SIPA1L2	5.3412	5.7112	5.1039	5.1598	7.0166	7.6158	4.4588	5.7695	5.7305	5.2486	4.9631	6.015	5.4513	4.789
ENSG00000236502	SIX3-AS1	0.1375	0.1375	0.1375	0.1375	0.1375	0.1375	0.1375	0.1375	0.1375	0.1375	0.1375	0.1375	0.1375	0.1375
ENSG00000259446	AC055874.1	0.1375	0.1375	0.1375	0.1375	0.1375	0.1375	0.1375	0.1375	0.1375	0.1375	0.1375	0.1375	0.1375	0.1375
ENSG00000224164	AL133264.2	0.3099	0.1375	0.1375	0.1375	0.1375	0.1375	0.1375	1.1587	0.9215	0.1375	0.5908	0.1375	0.1375	0.1375
ENSG00000186272	ZNF17	0.7642	1.2692	0.9324	0.249	0.8154	0.2339	1.8537	2.2597	2.7345	2.8533	1.2183	1.4884	0.8543	0.8448
ENSG00000237547	IGHJ2P	0.1375	0.1375	0.1375	0.1375	0.1375	0.1375	0.1375	0.1375	0.1375	0.1375	0.1375	0.1375	0.1375	0.1375
ENSG00000226386	PARD3-AS1	0.1375	0.1375	0.1375	0.1375	0.1375	0.1375	0.1375	0.1375	0.1375	0.1375	0.1375	0.1375	0.1375	0.1375
ENSG00000204967	PCDHA4	0.145	0.2177	0.1598	0.1564	0.1545	0.1375	0.1722	0.1492	0.3447	0.1375	0.1375	0.1537	0.1375	0.1375
ENSG00000252897	RNU6-685P	0.1375	0.1375	0.1375	0.1375	0.1375	0.1375	0.1375	0.1375	0.1375	0.1375	0.1375	0.1375	0.1375	0.1375
ENSG00000214915	BX546450.1	0.1375	0.1375	0.1375	0.1375	0.1375	0.1375	0.1375	0.1375	0.1375	0.1375	0.1375	0.1375	0.1375	0.1375
ENSG00000276786	BX640515.1	0.1375	0.1375	0.1375	0.1375	0.1375	0.1375	0.1375	0.1375	0.1375	0.1375	0.1375	0.1375	0.1375	0.1375
ENSG00000187288	CIDEC	0.1375	0.1375	0.1375	0.1375	0.1375	0.1375	0.1375	0.1375	0.1375	0.1375	0.1375	0.1375	0.1375	0.1375
ENSG00000158710	TAGLN2	8.9301	9.3308	8.4356	8.6043	8.648	8.8391	8.0867	8.5471	8.0982	8.211	7.9586	8.3573	8.3227	8.9314
ENSG00000282865	AL157815.1	0.1375	0.1375	0.1375	0.1375	0.1375	0.1375	0.1375	0.1375	0.1375	0.1375	0.1375	0.1375	0.1375	0.1375
ENSG00000161981	SNRNP25	0.7699	1.4808	1.1703	0.802	1.2485	1.0546	2.4519	2.7388	2.6225	3.1916	1.0316	1.2731	2.3283	2.6795
ENSG00000185078	AC093698.1	0.3315	0.1375	0.1375	0.1375	0.1375	0.1375	0.1375	0.1375	0.1375	0.1375	0.1375	0.1375	0.1375	0.1375
ENSG00000073737	DHRS9	1.8562	1.7992	0.829	1.2112	4.2452	4.3127	4.6343	4.1803	6.731	6.3691	2.3781	2.2503	3.2992	3.5483
ENSG00000130511	SSBP4	2.7157	3.5035	3.0583	2.6058	4.2416	3.9917	5.3787	6.0296	6.6962	6.6862	4.9065	5.3706	4.4839	3.265
ENSG00000273077	AC110609.1	0.1375	0.1375	0.1375	0.1375	0.1375	0.1375	0.1375	0.1375	0.1375	0.1375	0.1375	0.1375	0.1375	0.1375
ENSG00000227233	CICP17	0.1375	0.1375	0.1375	0.1375	0.1375	0.1375	0.1375	0.1375	0.1375	0.1375	0.1375	0.1375	0.1375	0.1375
ENSG00000244932	AL449212.1	0.1375	0.1375	0.1375	0.1375	0.1375	0.1375	0.1375	0.1375	0.1375	0.1375	0.1375	0.1375	0.1375	0.1375
ENSG00000282022	AC006581.2	0.8603	1.6653	0.9016	0.6299	0.6211	0.1375	0.1375	1.06	0.1375	0.1375	0.1375	0.8815	1.5827	0.1375
ENSG00000283612	MIR103B1	0.1375	0.1375	0.1375	0.1375	0.1375	0.1375	0.1375	0.1375	0.1375	0.1375	0.1375	0.1375	0.1375	0.1375
ENSG00000269446	AC006967.3	0.1375	0.1375	0.1375	0.1375	0.1375	0.1375	0.1375	0.1375	0.1375	0.1375	0.1375	0.1375	0.1375	0.1375
ENSG00000219863	RPL31P28	0.1375	0.4953	0.1375	0.1375	0.1375	0.1375	0.1375	0.1375	0.3761	0.1375	0.1375	0.1375	0.1375	0.1375
ENSG00000131864	USP29	0.1375	0.1375	0.1375	0.1375	0.1375	0.1375	0.1375	0.1375	0.1375	0.1375	0.1375	0.1375	0.1375	0.1375
ENSG00000235819	AL158828.1	0.1375	0.1375	0.1375	0.1375	0.1375	0.1375	0.1375	0.1375	0.1375	0.1375	0.1375	0.1375	0.1375	0.1375
ENSG00000258995	PARP1P2	0.1375	0.1375	0.1375	0.1375	0.1375	0.1375	0.1375	0.1375	0.1375	0.1375	0.1375	0.1375	0.1375	0.1375
ENSG00000136404	TM6SF1	2.3952	2.2585	2.5257	2.9828	3.3835	3.0118	1.7271	2.6259	2.6621	1.8178	1.4623	1.1424	2.3951	2.1082
ENSG00000275094	AC079395.3	0.1375	0.1375	0.1375	0.1375	0.1375	0.1375	0.1375	0.1375	0.1375	0.1375	0.1375	0.1375	0.1375	0.1375
ENSG00000122735	DNAI1	0.4872	0.6792	0.1822	0.1375	0.2725	0.3435	1.7966	1.5007	5.2459	4.2431	0.3604	0.1375	0.1375	0.1375
ENSG00000244297	RN7SL465P	0.1375	0.1375	0.1375	0.1375	0.1375	0.1375	0.1375	0.1375	0.1375	0.1375	0.1375	0.1375	0.1375	0.1375
ENSG00000214578	HMGN2P15	0.2433	0.1894	0.1375	0.1375	0.1375	0.1375	0.1375	0.1375	0.1375	0.1375	0.1375	0.1375	0.1375	0.1375
ENSG00000233714	AC012506.3	0.1375	0.1375	0.1375	0.1375	0.1375	0.1375	0.1375	0.1375	0.1375	0.1375	0.1375	0.1375	0.1375	0.1375
ENSG00000158825	CDA	5.0405	5.0536	5.2274	5.4073	7.3846	7.3628	4.1677	4.5814	5.6343	3.7991	2.9882	3.389	3.7456	6.1199
ENSG00000201818	RNY4P17	0.1375	0.1375	0.1375	0.1375	0.1375	0.1375	0.1375	0.1375	0.1375	0.1375	0.1375	0.1375	0.1375	0.1375
ENSG00000235644	RPL10P5	0.3142	0.1375	0.1375	0.1375	0.1375	0.1375	0.1375	0.1375	0.1375	0.1375	0.1375	0.1375	0.1375	0.1375
ENSG00000148925	BTBD10	2.8118	2.8003	2.3657	2.3642	3.2707	3.2615	3.1073	3.0313	3.6899	2.8243	2.5989	3.4262	3.1176	3.847
ENSG00000266049	AP001011.1	0.1375	0.1375	0.1375	0.1375	0.2411	0.1375	0.1375	0.1375	0.1375	0.1375	0.1375	0.1375	0.1375	0.1375
ENSG00000178531	CTXN1	1.2125	2.1956	0.8547	0.4938	0.8813	0.8401	5.3983	4.9369	6.0596	5.4407	1.2173	0.7833	1.1382	2.0372
ENSG00000202459	Y_RNA	0.7358	1.2437	0.1375	1.4792	1.4763	1.9222	0.4515	0.9971	0.7661	0.1375	1.4919	0.6185	0.1375	0.1375
ENSG00000206959	Y_RNA	0.1375	0.1375	0.1375	0.1375	0.1375	0.1375	0.1375	0.1375	0.1375	0.1375	0.1375	0.1375	0.1375	0.1375
ENSG00000135750	KCNK1	0.3	0.1375	0.1375	0.2624	0.2215	0.2542	1.9355	1.0448	4.1439	3.3673	0.1375	0.2884	0.1375	0.9896
ENSG00000207113	RNU6-16P	0.7814	0.1375	0.1375	0.1375	0.1375	0.1375	0.1375	0.1375	0.1375	0.1375	0.1375	0.1375	0.1375	0.1375
ENSG00000284094	MIR6073	0.1375	0.257	0.1375	0.1375	0.1375	0.1375	0.1375	0.1375	0.2364	0.1375	0.1375	0.1375	0.1375	0.1375
ENSG00000165621	OXGR1	0.1375	0.1375	0.1375	0.1375	0.1375	0.1375	0.1776	0.1375	1.4639	0.1375	0.1938	0.1375	0.1375	0.1375
ENSG00000231662	AL357052.1	0.1375	0.1375	0.1375	0.1375	0.1375	0.1375	0.1375	0.1375	0.1375	0.1375	0.1375	0.1375	0.1375	0.1375
ENSG00000197978	GOLGA6L9	0.1613	0.1375	0.1554	0.2162	0.171	0.1626	0.3466	0.3987	0.2691	0.7027	0.1375	0.1375	0.1375	0.1375
ENSG00000166813	KIF7	0.1375	0.1687	0.1375	0.1375	0.1375	0.1375	0.1772	0.1861	0.1375	0.3677	0.1949	0.2389	0.2902	0.1375
ENSG00000251779	Y_RNA	0.3122	0.328	0.6459	0.1375	0.1375	0.1375	0.1375	0.1375	0.1375	0.1375	0.1375	0.1375	0.1375	0.1375
ENSG00000185129	PURA	0.7435	1.48	0.4742	0.7395	1.484	0.9935	2.6802	3.2755	3.0477	2.2351	1.417	1.7282	0.9612	1.5264
ENSG00000163293	NIPAL1	0.3954	1.1232	0.2894	1.0185	0.6329	0.7524	0.8951	1.02	1.5953	1.5557	0.2987	0.545	0.1375	3.682
ENSG00000257985	AC004801.4	0.1375	0.1375	0.1375	0.1375	0.1375	0.1375	0.1375	0.1375	0.1375	0.1375	0.1375	0.1375	0.1375	0.1375
ENSG00000277486	SAGE3P	0.1375	0.1375	0.1375	0.1375	0.1375	0.1375	0.1375	0.1375	0.1375	0.1375	0.1375	0.1375	0.1375	0.1375
ENSG00000259146	AC005476.2	1.2439	1.0341	0.1375	0.7897	0.1375	0.4101	1.4871	1.0637	2.201	0.1375	0.8181	1.978	0.1375	0.1375
ENSG00000260232	PWRN4	0.1375	0.1375	0.1375	0.1375	0.1375	0.1375	0.1375	0.1375	0.1375	0.1375	0.1375	0.1375	0.1375	0.1375
ENSG00000225479	PLCB1-IT1	1.1892	0.8295	0.1375	0.1375	1.2085	0.2427	1.1802	1.3009	0.4334	0.1375	0.958	0.7081	1.9678	0.1375
ENSG00000163823	CCR1	6.8255	6.8324	5.9728	6.3559	7.4303	7.3381	7.7366	7.7965	4.9717	5.4427	7.8878	8.2309	5.6824	5.5426
ENSG00000200665	RNU6-1188P	0.1375	0.1375	0.1375	0.1375	0.1375	0.1375	0.1375	0.1375	0.1375	0.1375	0.1375	0.1375	0.1375	0.1375
ENSG00000199634	RNU4-79P	0.1375	0.1375	0.1375	0.1375	0.1375	0.1375	0.1375	0.1375	0.1375	0.1375	0.1375	0.1375	0.1375	0.1375
ENSG00000063587	ZNF275	0.3935	0.5658	0.4216	0.3375	0.5288	0.362	1.2379	1.8099	1.3806	0.5568	1.2548	1.3629	1.1482	1.9819
ENSG00000173744	AGFG1	4.0111	4.4135	3.2465	4.0172	5.2206	5.527	4.0505	3.6937	5.231	5.3863	4.6107	4.8628	4.6382	2.7836
ENSG00000235612	AL353681.1	0.1375	0.1375	0.1375	0.1375	0.1375	0.1375	0.1375	0.1375	0.1375	0.1375	0.1375	0.1375	0.1375	0.1375
ENSG00000225026	AC091492.1	1.5172	1.7964	0.644	0.8028	2.2756	3.1806	2.2419	3.8059	2.1316	3.694	2.5521	3.3834	3.3963	3.9146
ENSG00000132563	REEP2	0.3472	0.5882	0.2178	0.4025	0.8019	0.3035	1.2843	0.5106	1.4972	1.6432	0.3889	0.2882	0.1375	0.9827
ENSG00000278849	AL513478.2	0.1375	0.1375	0.1375	0.1375	0.1375	0.1375	0.1375	0.1375	0.1375	0.1375	0.1375	0.1375	0.1375	0.1375
ENSG00000184111	RPL11P4	0.1375	0.1375	0.1375	0.1375	0.1375	0.1375	0.1375	0.1375	0.1375	0.8025	0.1375	0.1375	0.1375	0.1375
ENSG00000265871	MIR3174	4.2246	4.3509	4.7076	4.9681	3.9144	4.1697	3.6868	4.051	3.3214	4.2875	2.9973	3.3342	3.7251	2.9556
ENSG00000261129	AC106871.1	0.1375	0.1375	0.1375	0.1375	0.1375	0.1375	0.1375	0.1375	0.1375	0.1375	0.1375	0.1375	0.1375	0.1375
ENSG00000243495	GMFBP1	0.1375	0.1375	0.1375	0.1375	0.1375	0.1375	0.1375	0.1375	0.1375	0.1375	0.1375	0.1375	0.1375	0.1375
ENSG00000133640	LRRIQ1	0.1375	0.1896	0.1375	0.1375	0.1375	0.1375	3.6936	2.187	5.231	4.2816	0.1375	0.1375	0.1375	0.1375
ENSG00000234617	SNRK-AS1	0.9341	0.7298	0.7019	0.9431	0.4517	0.3167	0.1981	0.9049	0.8196	0.7595	0.4525	0.1884	0.1375	0.1375
ENSG00000253475	AC103769.1	1.561	2.0068	2.2416	2.4829	2.3061	2.7786	1.9336	3.9195	1.665	3.9092	2.7786	4.2333	2.5118	3.3633
ENSG00000165626	BEND7	0.6941	0.4621	0.4927	0.3921	2.6441	2.472	2.5132	1.5627	3.7455	2.3012	0.1579	0.1633	0.4404	1.3513
ENSG00000252404	SCARNA16	0.1375	0.1375	0.1375	0.1375	0.1375	0.1375	0.1375	0.1375	0.1375	0.1375	0.1375	0.1375	0.1375	0.1375
ENSG00000270001	AL121894.2	0.337	0.631	0.3263	0.1375	0.1375	0.2315	0.3153	0.1375	0.1375	1.469	0.5394	0.5563	0.1375	0.1375
ENSG00000257329	AC011611.2	0.2166	0.1375	0.1375	0.1375	0.1824	0.2103	0.2507	0.1375	0.1375	0.1375	0.1375	0.1375	0.1375	0.1375
ENSG00000254495	AP000487.2	0.1375	0.1375	0.1375	0.1375	0.1375	0.1375	0.1375	0.1375	0.1375	0.1375	0.1375	0.5219	0.1375	0.1375
ENSG00000205702	CYP2D7	1.4327	1.4442	1.5587	1.3249	1.5412	1.624	1.4516	2.032	0.7623	0.1375	1.6212	2.0847	1.0481	0.1375
ENSG00000223889	AC073188.1	0.1375	0.1375	0.1375	0.1375	0.1375	0.1375	0.1375	0.1375	0.1375	0.1375	0.1375	0.1375	0.1375	0.1375
ENSG00000231874	TSPY18P	0.1375	0.1375	0.1375	0.1375	0.1375	0.1375	0.1375	0.1375	0.1375	0.1375	0.1375	0.1375	0.1375	0.1375
ENSG00000257696	AC010203.2	1.3908	1.8655	0.1375	1.2126	0.1375	0.5529	0.8045	1.2462	0.1375	0.1375	0.8767	0.8958	0.1375	0.1375
ENSG00000249945	AC131094.1	0.1375	0.1375	0.1375	0.1375	0.1375	0.1375	0.1375	0.1375	0.1375	0.1375	0.1375	0.1375	0.1375	0.1375
ENSG00000266370	MIR3657	0.1375	0.1375	0.1375	0.3239	0.1375	0.1375	0.3553	0.1375	0.1375	0.1375	0.2466	0.1375	0.1375	0.1375
ENSG00000227392	HPN-AS1	0.1375	0.1375	0.1375	0.1375	0.1375	0.1375	0.1375	0.1375	0.1375	0.1375	0.1375	0.1375	0.1375	0.1375
ENSG00000237445	AL359771.1	0.1375	0.1375	0.1375	0.1375	0.1375	0.1375	0.1375	0.1375	0.1375	0.1375	0.1375	0.1375	0.1375	0.1375
ENSG00000259906	AC120045.1	0.1375	0.1375	0.1375	0.1375	0.1375	0.1375	0.1375	0.1375	0.1375	0.1375	0.1375	0.1375	0.1375	0.1375
ENSG00000276131	AC009118.2	0.1375	0.519	0.1375	0.1375	0.1375	0.278	0.1375	0.1375	1.3682	2.1653	0.3275	1.1908	0.1375	0.1375
ENSG00000267650	AC008742.1	0.1375	0.1375	0.1375	0.1375	0.1375	0.1375	0.1375	0.1375	0.1375	0.1375	0.1375	0.1375	0.1375	0.1375
ENSG00000146678	IGFBP1	0.1375	0.1375	0.1375	0.1375	0.1375	0.1375	0.1375	0.1375	0.1375	0.1375	0.1375	0.1375	0.1375	0.1375
ENSG00000166436	TRIM66	0.8475	0.9588	0.6028	0.4742	1.9588	2.3007	1.4568	1.9842	1.9048	0.839	1.0003	1.9746	1.3559	1.6406
ENSG00000226666	HSPA9P1	0.1375	0.1375	0.1375	0.1375	0.1375	0.1375	0.1375	0.1375	0.1375	0.1375	0.1375	0.2051	0.1375	0.1375
ENSG00000255549	ENPP7P6	0.1375	0.1375	0.1375	0.1375	0.1375	0.1375	0.1375	0.1375	0.1375	0.1375	0.2718	0.2082	0.1375	0.1375
ENSG00000239069	Y_RNA	0.1375	0.1375	0.1375	0.1375	0.1375	0.1375	0.1375	0.1375	0.1375	0.1375	0.1375	0.1375	0.1375	0.1375
ENSG00000207799	MIR520G	0.1375	0.1375	0.1375	0.1375	0.1375	0.1375	0.1375	0.1375	0.1375	0.1375	0.1375	0.1375	0.1375	0.1375
ENSG00000233399	LINC01648	0.1375	0.1375	0.1375	0.1375	0.1375	0.1375	0.1375	0.1375	0.1375	0.1375	0.1375	0.1375	0.1375	0.1375
ENSG00000224448	AC005020.1	0.1375	0.1375	0.1375	0.1375	0.1375	0.1375	0.1375	0.1375	0.1375	0.1375	0.1375	0.1375	0.1375	0.1375
ENSG00000240107	AC046144.1	0.1375	0.1375	0.1375	0.1375	0.1375	0.1375	0.1375	0.1375	0.1375	0.1375	0.1375	0.1375	0.1375	0.1375
ENSG00000203786	KPRP	0.1375	0.1375	0.1375	0.1375	0.1375	0.1375	1.3681	0.6706	0.1375	0.1375	0.1375	0.1375	0.8187	1.6812
ENSG00000259605	AC074212.1	0.1375	0.2358	0.2193	0.1375	0.2008	0.204	0.6967	0.8582	0.6927	0.1375	0.2186	0.2541	0.5813	1.2757
ENSG00000179627	ZBTB42	0.4092	0.6151	0.4711	0.37	0.4877	0.2984	2.5291	2.2627	3.3851	2.6055	2.4792	3.0235	1.515	2.9243
ENSG00000259904	ACTG1P15	0.1375	0.1375	0.1375	0.1375	0.1375	0.1375	0.1375	0.1375	0.1375	0.1375	0.1375	0.1375	0.1375	0.1375
ENSG00000270617	URGCP-MRPS24	0.1375	0.1375	0.1375	0.1375	0.1375	0.1695	0.2454	0.1375	0.1375	0.5068	0.1664	0.1375	0.1375	0.1375
ENSG00000231185	SPRY4-AS1	0.1375	0.1375	0.1375	0.1375	0.1375	0.1375	0.1375	0.3299	0.1375	0.1375	0.1375	0.1375	0.1375	0.1375
ENSG00000261635	AC103988.2	0.2413	0.323	0.1375	0.2765	0.3439	0.2416	0.4268	0.7948	0.1375	1.2183	0.4448	0.3576	0.1375	0.1375
ENSG00000199620	RNA5SP258	0.1375	0.1375	0.1375	0.1375	0.1375	0.1375	0.1375	0.1375	0.1375	0.1375	0.1375	0.1375	0.1375	0.1375
ENSG00000180902	D2HGDH	1.6075	2.8878	1.5311	1.7903	3.2029	2.4732	4.4676	5.4322	2.6123	1.9257	4.8449	5.3688	3.5223	1.915
ENSG00000223306	RNU6-1304P	0.1375	0.1375	0.1375	0.1375	0.1375	0.1375	0.1375	0.1375	0.1375	0.1375	0.1375	0.1375	0.1375	0.1375
ENSG00000223626	LINC01044	0.1375	0.1375	0.1375	0.1375	0.1375	0.1375	0.1375	0.1375	0.1375	0.1375	0.1375	0.1375	0.1375	0.1375
ENSG00000267629	AC138430.1	0.1559	0.2924	0.1591	0.1375	0.1375	0.1375	0.1375	0.1948	0.1375	0.1375	0.1375	0.1375	0.1375	0.1375
ENSG00000255033	SERPINA15P	0.1375	0.1375	0.1375	0.1375	0.1375	0.1375	0.1375	0.1375	0.1375	0.1375	0.1375	0.1375	0.1375	0.1375
ENSG00000198857	HSD3BP5	0.1375	0.1375	0.1375	0.1375	0.1375	0.1375	0.1375	0.1375	0.1375	0.1375	0.1375	0.1375	0.1375	0.1375
ENSG00000253455	AC022915.1	0.1375	0.1375	0.1375	0.1375	0.1375	0.1375	0.1375	0.1375	0.1375	0.1375	0.1375	0.1375	0.1375	0.1375
ENSG00000236409	NRADDP	0.9783	1.2566	0.7684	0.6054	1.473	1.5905	1.0267	1.0539	1.4779	0.1375	0.6813	1.1998	1.4239	2.4347
ENSG00000254225	BTF3P1	0.2202	0.1847	0.6281	0.1375	0.1375	0.2284	0.1375	0.1375	0.1375	0.1375	0.1375	0.3009	0.1375	0.1375
ENSG00000207494	Y_RNA	0.1375	0.1375	0.1375	0.1375	0.1375	0.1375	0.1375	0.1375	0.1375	0.1375	0.1375	0.1375	0.1375	0.1375
ENSG00000136856	SLC2A8	0.8528	1.4505	0.5322	0.9296	0.9425	0.6212	2.9192	4.0041	1.8212	2.6163	2.7128	3.1763	1.9384	1.7634
ENSG00000152484	USP12	4.2894	4.573	3.5112	3.7401	1.9289	1.8278	3.6917	4.0608	3.4828	3.4662	4.35	4.0556	4.6041	2.6009
ENSG00000230695	AC012462.3	0.1375	0.1375	0.1375	0.1375	0.1375	0.1375	0.1375	0.1375	0.1375	0.1375	0.1375	0.1375	0.1375	0.1375
ENSG00000233056	ERVH48-1	0.1375	0.1375	0.1375	0.1375	0.1375	0.1818	0.1853	0.1375	0.1375	0.1375	0.1375	0.1375	0.1375	0.1375
ENSG00000244675	AC108676.1	0.1375	0.1375	1.0819	0.2827	0.514	0.1966	0.1375	0.1375	0.1375	0.1375	0.1375	0.1375	0.1375	0.1375
ENSG00000252266	Y_RNA	0.1375	0.1375	0.1375	0.1375	0.1375	0.1375	0.1375	0.1375	0.1375	0.1375	0.1375	0.1375	0.1375	0.1375
ENSG00000255072	PIGY	0.3415	0.5614	0.5107	0.4531	0.4847	0.377	0.3461	0.91	0.5276	1.5035	0.3653	0.6566	1.0472	0.1375
ENSG00000159164	SV2A	0.2847	0.2769	0.1906	0.2031	0.1375	0.1986	0.4386	0.667	0.4865	0.1375	0.6234	0.7706	0.1375	0.1375
ENSG00000250453	AC008825.1	0.1375	0.1375	0.1375	0.1375	0.1375	0.1375	0.1375	0.1375	0.1375	0.1375	0.1375	0.5732	0.1375	0.1375
ENSG00000231194	FARP1-AS1	1.1327	1.1795	0.7553	1.2096	0.7452	0.7255	0.8388	0.4829	1.1267	0.1375	1.6046	2.3503	1.8789	0.1375
ENSG00000241011	AC108073.2	0.1375	0.1375	0.1375	0.1375	0.1375	0.1375	0.1375	0.1375	0.1375	0.1375	0.1375	0.1375	0.1375	0.1375
ENSG00000267222	AC107993.1	0.5465	0.9694	0.855	0.7567	1.5634	1.4991	0.616	2.3091	1.9586	1.2399	1.8806	2.4273	0.8245	1.3214
ENSG00000224389	C4B	0.1375	0.2235	0.2425	0.1375	0.1375	0.1687	1.6987	1.185	1.4989	0.1375	0.3692	0.471	0.1375	0.1375
ENSG00000156510	HKDC1	0.266	0.1717	0.1375	0.1375	0.1969	0.5965	0.3051	0.2047	0.1861	0.1375	0.1375	0.3948	0.1375	0.1375
ENSG00000200600	Y_RNA	0.1375	0.1375	0.1375	0.1375	0.1375	0.1375	0.1375	0.1375	0.1375	0.1375	0.1375	0.1375	0.1375	0.1375
ENSG00000116031	CD207	1.2468	0.6602	1.4931	1.6808	0.1856	0.1375	0.1375	0.1375	0.1375	0.1375	0.1721	0.3871	1.5634	0.1375
ENSG00000211845	TRAJ44	0.1375	0.5426	1.2477	0.1375	0.1375	0.4536	2.8993	1.5504	0.1375	0.1375	1.8318	0.1375	0.1375	0.1375
ENSG00000135269	TES	4.5698	5.348	4.901	4.5878	4.0103	4.5706	4.4369	5.2639	5.2154	5.9883	5.0109	5.6659	4.7825	4.979
ENSG00000230972	AP001116.1	0.1375	0.1375	0.1375	0.1375	0.1375	0.1375	0.1375	0.1375	0.1375	0.1375	0.1375	0.1375	0.1375	0.1375
ENSG00000184307	ZDHHC23	0.8607	0.8516	0.261	0.3985	0.3375	0.3009	1.6561	1.1154	3.1978	1.9392	0.3685	0.4242	0.4607	0.1375
ENSG00000118412	CASP8AP2	0.9369	0.9522	1.2806	0.9781	1.3614	1.2223	2.5004	2.2666	2.4602	1.1377	1.8287	2.1388	2.3113	1.7745
ENSG00000225594	AC098826.1	0.1375	0.1375	0.1375	0.1375	0.1375	0.1375	0.1375	0.1375	0.1375	0.1375	0.1375	0.1375	0.1375	0.1375
ENSG00000234665	AL512625.3	0.1375	0.1997	0.1375	0.1375	0.1375	0.1962	0.1375	0.1375	1.7426	1.4522	0.1788	0.1375	0.1375	0.1375
ENSG00000249613	LINC02173	0.1375	0.1375	0.1375	0.1375	0.1375	0.1375	0.1375	0.1375	0.1375	0.1375	0.1375	0.1375	0.1375	0.1375
ENSG00000199488	RNU1-70P	0.1375	0.1375	0.1375	0.1375	0.1375	0.1375	0.1375	0.1375	0.1375	0.1375	0.1375	0.1375	0.1375	0.1375
ENSG00000233583	AL356273.1	1.7932	1.3201	0.9654	2.2658	0.2964	0.2191	0.574	0.4142	0.5564	1.575	1.0329	1.2043	0.1375	0.1375
ENSG00000008323	PLEKHG6	0.2701	0.9025	0.3364	0.1375	0.308	0.2206	2.6278	1.7346	3.6359	3.3452	0.5884	1.234	1.2627	3.3784
ENSG00000091181	IL5RA	0.2785	0.1889	0.2005	0.1757	0.2048	0.2247	3.117	2.2692	5.0841	4.4153	0.1915	0.1375	0.7029	0.1375
ENSG00000274766	BX072579.2	0.1375	0.1375	0.1375	0.1375	0.1375	0.1375	0.1375	0.1375	0.1375	0.1375	0.1375	0.1375	0.1375	0.1375
ENSG00000202495	Y_RNA	0.1375	0.1375	0.1375	0.1375	0.1375	0.1375	0.1375	0.1375	0.1375	0.1375	0.1375	0.1375	0.1375	0.1375
ENSG00000275743	TRBV14	0.2939	0.1375	0.1375	0.1375	0.1375	0.1375	0.1375	0.1375	0.1375	0.1375	0.1375	0.1375	0.1375	0.1375
ENSG00000162496	DHRS3	2.5938	3.1481	2.5927	2.2752	1.8031	2.4103	4.6375	5.8255	6.3154	5.8263	3.9645	4.624	4.9363	4.1756
ENSG00000111783	RFX4	0.1375	0.1375	0.1375	0.1375	0.1375	0.1375	0.1375	0.1375	0.1375	0.1375	0.1375	0.1375	0.1375	0.1375
ENSG00000071564	TCF3	1.8044	2.5983	1.8503	1.5033	2.1406	1.8629	3.1043	3.8755	2.2276	2.3935	2.3246	3.528	2.9673	2.6507
ENSG00000219565	ZNF259P1	0.1375	0.1375	0.1375	0.1375	0.1375	0.1375	0.1375	0.1375	0.1375	0.1375	0.1375	0.1375	0.1375	0.1375
ENSG00000267112	AC098848.1	0.1375	0.1375	0.1375	0.1375	0.1375	0.1375	0.1375	0.1375	0.1375	0.1375	0.1375	0.1375	0.1375	0.1375
ENSG00000121058	COIL	1.0923	1.4628	0.7966	0.8986	1.509	1.4052	2.3329	2.1387	2.8166	1.5855	1.6014	1.9019	1.8975	0.8582
ENSG00000268407	AC006115.2	0.1375	0.1375	0.1375	0.1375	0.1375	0.1375	0.1375	0.1375	0.1375	0.1375	0.1375	0.1375	0.1375	0.1375
ENSG00000166845	C18orf54	0.2193	0.2099	0.1982	0.1375	0.2341	0.1375	0.4062	0.2598	0.2001	0.4961	0.3667	0.536	0.1375	0.1375
ENSG00000160785	SLC25A44	3.4364	3.3669	2.924	3.0822	4.703	4.9979	3.6064	4.2603	3.1038	3.2707	3.3317	3.7674	3.4478	4.6518
ENSG00000179761	PIPOX	1.6416	1.6974	1.2294	1.3727	1.9297	1.4153	1.7652	2.5273	1.8797	0.8422	1.0611	1.4676	0.8539	0.1375
ENSG00000258610	AF111169.2	0.3788	0.1375	0.5694	0.1375	0.1375	0.5449	0.1375	0.1375	0.1375	0.1375	0.3893	0.8083	0.1375	0.1375
ENSG00000278078	AC025279.3	0.1375	0.1375	0.1375	0.1375	0.1375	0.1375	0.1375	0.1375	0.1375	0.1375	0.1375	0.1375	0.1375	0.1375
ENSG00000006788	MYH13	0.1375	0.1375	0.1375	0.1375	0.1375	0.1375	0.1375	0.1375	0.1375	0.1375	0.1375	0.1375	0.1375	0.1375
ENSG00000254986	DPP3	1.7609	2.8937	1.4245	1.7534	2.1541	2.4507	3.1754	3.9531	3.48	2.9234	2.8054	3.4222	3.9035	2.704
ENSG00000279133	AC018628.1	2.3137	3.0272	2.6356	2.3939	2.8359	2.9183	2.4027	3.3405	1.9321	2.3887	3.2982	3.7717	2.9526	2.99
ENSG00000161653	NAGS	0.2709	0.6378	0.4073	0.1858	0.1375	0.1375	0.8058	0.925	0.9131	0.6311	0.8268	0.9529	0.4413	2.197
ENSG00000258080	ARHGAP42P4	0.1375	0.1375	0.1375	0.1375	0.1375	0.1375	0.1375	0.1375	0.1375	0.1375	0.1375	0.1375	0.1375	0.1375
ENSG00000179218	CALR	6.4134	6.9549	6.5604	6.306	6.5182	5.5573	6.803	8.627	7.9883	8.4621	7.9842	8.024	8.4942	5.5706
ENSG00000264630	PRKCA-AS1	0.1375	0.1375	0.1375	0.1375	0.1375	0.1375	0.1375	0.1375	0.1375	0.1375	0.1375	0.1375	0.1375	0.1375
ENSG00000105849	TWISTNB	3.477	3.8673	3.5589	3.6826	0.6334	0.8299	1.7486	1.8444	2.8273	2.9735	1.9412	1.5194	2.3504	1.602
ENSG00000280076	AC112693.3	0.1375	0.1375	0.1375	0.1375	0.1375	0.1375	0.1375	0.1375	0.1375	0.1375	0.1543	0.1375	0.1375	0.1375
ENSG00000138075	ABCG5	0.1375	0.1375	0.1375	0.1375	0.2804	0.1798	0.1375	0.1375	0.1375	0.1375	0.1375	0.1375	0.1375	0.1375
ENSG00000215604	ZNF962P	0.1375	0.1375	0.1375	0.1375	0.1375	0.1375	0.1375	0.1375	0.1375	0.1375	0.1375	0.1375	0.1375	0.1375
ENSG00000211699	TRGV3	1.0037	1.2328	0.8549	1.7648	0.2153	0.1375	1.1781	0.4027	0.1375	2.3837	1.418	1.7182	2.1648	0.1375
ENSG00000236348	PSMC1P10	0.1375	0.1375	0.1375	0.1375	0.1375	0.1375	0.1375	0.1375	0.1375	0.1375	0.1375	0.1375	0.1375	0.1375
ENSG00000228413	AC024937.1	0.1375	0.1375	0.1375	0.1375	0.1375	0.1375	0.1375	0.1375	0.1375	0.1375	0.1375	0.1375	0.1375	0.1375
ENSG00000228127	LINC01649	0.1375	0.1375	0.1375	0.1375	0.1375	0.1375	0.1375	0.1375	0.1375	0.1375	0.1375	0.1375	0.1375	0.1375
ENSG00000169397	RNASE3	0.34	0.4905	0.8926	0.4066	0.5717	0.5799	0.8916	1.08	0.1375	0.1375	1.5987	1.3365	0.9038	0.1375
ENSG00000277481	PKD1L3	0.1375	0.1375	0.1375	0.1375	0.1375	0.1375	0.1588	0.1375	0.1375	0.5282	0.1579	0.1375	0.1375	0.1375
ENSG00000278540	ACACA	1.2492	1.4238	1.2727	1.188	1.3781	0.9562	2.5799	1.7348	5.1835	4.2724	0.9806	1.3228	2.0997	2.6537
ENSG00000282173	TRBJ1-5	0.8141	0.2821	0.1375	1.3935	0.8414	1.1727	2.9198	3.7079	0.1375	0.1375	2.1358	2.4743	1.8839	0.1375
ENSG00000256481	AP006333.2	0.1375	0.1375	0.1375	0.1375	0.1375	0.1375	0.1375	0.1375	0.1375	0.1375	0.1375	0.1375	0.1375	0.1375
ENSG00000164107	HAND2	0.1375	0.1375	0.1375	0.1375	0.1375	0.1375	0.1375	0.1375	0.1375	0.1375	0.1375	0.1375	0.1375	0.1375
ENSG00000257178	AC103702.1	0.1665	0.1375	0.1857	0.1375	0.1716	0.1375	0.1715	0.2827	0.1375	0.1375	0.1846	0.1375	0.1375	0.1375
ENSG00000166342	NETO1	0.1631	0.1375	0.1375	0.1375	0.1375	0.1375	0.1375	0.4916	0.1375	0.1375	0.1375	0.1375	0.3527	0.6066
ENSG00000227072	AL353706.1	0.1375	0.1375	0.1375	0.1375	0.2757	0.1375	0.4599	0.2524	0.1375	0.1375	0.2923	0.4091	0.1375	0.1375
ENSG00000226428	RPL15P13	0.1375	0.1375	0.1375	0.1375	0.1375	0.1375	0.1375	0.1375	0.1375	0.1375	0.1375	0.1375	0.1375	0.1375
ENSG00000224904	AL021155.1	0.3823	0.4741	0.1375	0.1776	0.1375	0.1375	0.1716	0.1375	0.1375	0.1375	0.1375	0.1375	0.6104	0.1375
ENSG00000261147	AC091167.3	0.1633	0.1427	0.1375	0.1375	0.1375	0.15	0.2608	0.3343	0.1375	0.9369	0.2115	0.5172	0.1375	0.1375
ENSG00000234964	FABP5P7	0.264	0.274	0.1375	0.3702	0.2633	0.1375	0.4003	0.9902	0.1375	0.1375	0.2708	0.7798	2.1251	0.1375
ENSG00000252822	Y_RNA	0.1375	0.1375	0.1375	0.1375	0.1375	0.1375	0.1375	0.1375	0.1375	0.1375	0.1375	0.1375	0.1375	0.1375
ENSG00000197635	DPP4	0.5295	0.8071	0.7509	0.7913	0.6664	0.5508	2.2218	2.836	0.1375	0.1375	1.7493	0.9872	0.7951	0.1375
ENSG00000173575	CHD2	7.6923	8.3046	8.4412	8.3603	7.6018	8.289	7.4366	8.2844	8.221	7.5515	7.5076	7.5551	7.6598	7.3297
ENSG00000054118	THRAP3	5.3525	5.8069	4.7342	4.934	5.3434	5.4379	5.0251	5.7153	6.2021	5.2847	5.4335	6.0496	5.4803	4.7954
ENSG00000215458	AATBC	0.337	0.7443	0.5837	0.4794	0.251	0.2651	0.5714	1.4734	0.7616	0.9595	0.7656	1.422	1.4544	0.1375
ENSG00000207182	RNU1-44P	0.1375	0.1375	0.1375	0.4337	0.1375	0.1375	0.1375	0.1375	0.1375	0.1375	0.1375	0.1375	0.1375	0.1375
ENSG00000106799	TGFBR1	4.2599	4.4951	3.0396	3.2012	3.3918	3.575	2.5126	3.3018	4.9812	3.7278	2.1464	1.9553	4.1488	2.412
ENSG00000274970	AC013470.4	0.1375	0.1375	0.1375	0.1375	0.1375	0.1375	0.1375	0.1375	0.1375	0.1375	0.1375	0.1375	0.1375	0.1375
ENSG00000238217	LINC01877	0.1375	0.1375	0.1375	0.1375	0.1375	0.1375	0.1375	0.1375	0.1375	0.1375	0.1375	0.1375	0.1375	0.1375
ENSG00000283095	FP565171.1	0.1375	0.1375	0.1375	0.1375	0.1375	0.1375	0.1375	0.1375	0.1375	0.1375	0.1375	0.1375	0.1375	0.1375
ENSG00000233370	AC140479.3	0.1375	0.1375	0.1375	0.1375	0.1375	0.1375	0.2612	0.1375	0.1375	0.1375	0.2507	0.1375	0.1375	0.1375
ENSG00000226701	RPL15P14	0.1375	0.1375	0.1375	0.1375	0.1375	0.1375	0.1375	0.1375	0.1375	0.1375	0.1375	0.1375	0.1375	0.1375
ENSG00000259256	LINC01895	0.1375	0.1375	0.1375	0.1375	0.1375	0.1375	0.1375	0.1375	0.1375	0.1375	0.1375	0.1375	0.1375	0.1375
ENSG00000167139	TBC1D21	0.1375	0.1375	0.1375	0.1375	0.1375	0.1375	0.1375	0.1375	0.1375	0.1375	0.1375	0.1375	0.1375	0.1375
ENSG00000240131	AL049829.1	0.1375	0.1375	0.1375	0.1375	0.1375	0.1375	0.1375	0.1375	0.1375	0.1375	0.1375	0.1375	0.1375	0.1375
ENSG00000253271	AC027419.1	0.1375	0.1375	0.1375	0.1375	0.1375	0.1375	0.1375	0.1375	0.1375	0.1375	0.1375	0.1375	0.1375	0.1375
ENSG00000257094	AC016957.1	2.6917	2.3802	1.1435	2.4363	0.9706	1.1284	0.7189	1.4424	1.5591	0.1375	0.4796	1.0332	0.1375	0.1375
ENSG00000274552	MIR6889	0.1375	0.231	1.4516	0.1375	0.1375	0.1375	0.9773	0.8141	1.1872	0.1375	0.3656	1.5507	2.9887	0.1375
ENSG00000255468	AP001107.9	0.2563	0.1375	0.816	0.2206	0.1375	0.1375	0.2771	0.1375	0.1375	0.1375	0.5386	0.1375	0.1375	0.1375
ENSG00000265185	SNORD3B-1	3.1757	3.8902	4.551	4.075	2.406	3.601	4.6935	4.5089	2.6488	3.1626	5.4656	6.2556	5.854	4.5683
ENSG00000160183	TMPRSS3	0.4066	0.6598	0.1829	0.1375	0.5001	0.3763	3.2741	2.4906	4.5723	2.9486	0.6702	0.7506	1.0449	1.4348
ENSG00000235257	ITGA9-AS1	0.177	0.7174	0.2302	0.2011	0.2295	0.1905	0.3833	0.8322	0.3536	0.3123	0.1375	0.2446	0.1375	2.4268
ENSG00000232316	LINC02518	0.4098	0.6909	0.2485	0.4124	0.3031	0.5741	0.1375	0.1375	0.8981	0.1375	0.1375	0.1375	0.1375	0.1375
ENSG00000280305	AC018765.1	0.1375	0.1375	0.1375	0.1375	0.1375	0.1375	0.1375	0.1375	0.1375	0.1375	0.1375	0.1375	0.1375	0.1375
ENSG00000261741	FRG2KP	0.1375	0.1375	0.1375	0.1375	0.1375	0.1375	0.1375	0.1375	0.1375	0.1375	0.1375	0.1375	0.1375	0.1375
ENSG00000152292	SH2D6	0.547	1.6103	0.3745	0.3488	0.2257	0.3158	0.2954	1.035	0.1375	0.1375	1.2897	0.8857	0.9343	0.1375
ENSG00000278075	AC114341.1	1.9424	2.5263	2.5929	2.8987	1.1966	1.6302	1.6661	1.6369	1.7107	1.0159	1.601	2.5769	0.9225	2.108
ENSG00000275372	ZEB2_AS1_1	0.3827	0.6314	0.5196	0.5416	0.2925	1.4861	0.1766	0.4466	0.463	0.1375	4.0286	0.6928	1.7214	0.1375
ENSG00000149651	SPINT4	0.1375	0.1375	0.1375	0.1375	0.1375	0.1375	0.1375	0.1375	0.1375	0.1375	0.1375	0.1375	0.1375	0.1375
ENSG00000258278	CLUHP8	0.1375	0.1375	0.1375	0.1375	0.1375	0.1375	0.1375	0.1375	0.1375	0.1375	0.1375	0.1375	0.1375	0.1375
ENSG00000255541	AP000873.5	0.6057	0.9012	0.304	0.3458	0.318	0.1375	0.6195	0.5205	0.2823	0.1375	1.2408	0.1375	1.0836	0.1375
ENSG00000250682	LINC00491	0.1375	0.1375	0.1375	0.1375	0.1375	0.1375	0.1375	0.1375	1.6637	0.6518	0.1375	0.1375	0.1375	0.1375
ENSG00000261669	AC008731.1	0.1375	0.1375	0.1375	0.1375	0.1375	0.1375	0.1375	0.1375	0.1375	0.1375	0.1375	0.1375	0.1375	0.1375
ENSG00000202172	RNU6-1327P	0.1375	0.1375	0.1375	0.1375	0.1375	0.1375	0.1375	0.1375	0.1375	0.1375	0.3412	0.1375	0.1375	0.1375
ENSG00000235472	EIF4A1P7	0.1841	0.2506	0.1375	0.1375	0.1375	0.1375	0.1375	0.1375	0.1375	0.1375	0.1375	0.1375	0.1375	0.1375
ENSG00000201382	RNU6-558P	0.1375	0.1375	0.1375	0.1375	0.1375	0.1375	0.1375	0.1375	0.1375	0.1375	0.1375	0.1375	0.1375	0.1375
ENSG00000261505	AL031714.1	0.1375	0.2324	0.2551	0.2043	0.1375	0.1375	0.2352	0.2958	0.1375	0.1375	0.2171	0.3659	0.1375	0.1375
ENSG00000223928	NUP35P1	0.1375	0.1375	0.1375	0.1375	0.1375	0.1375	0.1375	0.1375	0.1375	0.1375	0.1375	0.1375	0.1375	0.1375
ENSG00000207492	RNU6-713P	0.1375	0.1375	0.1375	0.1375	0.1375	0.1375	0.1375	0.1375	0.1375	0.1375	0.1375	0.1375	0.1375	0.1375
ENSG00000225438	KRT41P	0.1375	0.1375	0.1375	0.1375	0.1375	0.1375	0.1375	0.1375	0.1375	0.1375	0.1375	0.265	0.1375	0.1375
ENSG00000143207	RFWD2	4.9722	5.1811	5.1085	5.0644	5.6973	5.9762	4.2485	5.203	5.3259	5.0241	4.6783	5.0348	5.4022	6.6844
ENSG00000267632	AC067852.6	1.3107	2.2334	2.1285	2.0674	2.7881	3.085	2.7595	3.924	3.1156	2.491	3.4439	4.1844	2.9686	0.1375
ENSG00000166558	SLC38A8	0.1375	0.1375	0.1375	0.188	0.1375	0.1375	0.2556	0.184	0.1375	0.1375	0.1375	0.1375	0.7843	0.1375
ENSG00000170848	PSG6	0.1375	0.1375	0.1375	0.1375	0.1375	0.1375	0.1375	0.1375	0.1375	0.1375	0.1375	0.1375	0.1375	0.1375
ENSG00000241106	HLA-DOB	1.5114	1.8775	1.1986	1.4317	1.0246	1.1667	1.8307	2.3207	1.333	1.7831	3.6112	3.975	0.7005	0.1375
ENSG00000273986	Metazoa_SRP	0.1375	0.4475	0.2896	0.1375	0.1375	0.1375	0.1375	0.3237	0.1375	0.1375	0.1375	1.0566	0.1375	0.1375
ENSG00000237323	AC245036.3	0.3522	0.1375	0.1375	0.199	0.3383	0.1375	0.1375	0.1375	0.1375	0.1375	1.5486	1.6882	0.1375	0.1375
[truncated: 56,304 more rows]
