# Supplementary material for: A Novel Processing-Free Method for RNAseq Analysis of Spontaneous Sputum in Chronic Obstructive Pulmonary Disease
Source: Front Pharmacol. 2021 Aug 19;12:704969. doi: 10.3389/fphar.2021.704969 (PMC8417251; doi:10.3389/fphar.2021.704969)
Supplement: Supplementary file 3 [file Table4.XLSX]

## Sheet: GO BP_SS_RNAseq
Name	Median score	S1842_00106_SS_MTM_Plug	S1842_00106_SS_MTM_Whole	S1842_00107_SS_MTM_Plug	S1842_00107_SS_MTM_Whole	S1842_00108_SS_MTM_Plug	S1842_00108_SS_MTM_Whole	S1842_00110_SS_MTM_Plug	S1842_00110_SS_MTM_Whole	S1842_00111_SS_MTM_Plug	S1842_00111_SS_MTM_Whole	S1842_00115_SS_MTM_Plug	S1842_00115_SS_MTM_Whole	S1842_00118_SS_MTM_Plug	S1842_00118_SS_MTM_Whole
GO_LEUKOCYTE_AGGREGATION	11454.6	11634.2	11573.1	11594	11642	11431.6	11457.1	11463.7	11471	10330.3	10627.6	11363.7	11355.7	11452.1	11433.7
GO_POSITIVE_REGULATION_OF_INTERLEUKIN_6_BIOSYNTHETIC_PROCESS	10673	10787.1	10610.7	10804.2	10884	10658	10609.5	10577.8	10688.1	10187.4	10570.9	10792.2	10820.2	10690.2	10580.1
GO_COTRANSLATIONAL_PROTEIN_TARGETING_TO_MEMBRANE	10426.1	10578.2	10491	10455.2	10343	9904.33	9520.26	10662.1	9850.3	10192.8	10756.4	10397	10037.1	11145.5	11155.5
GO_T_CELL_ACTIVATION_VIA_T_CELL_RECEPTOR_CONTACT_WITH_ANTIGEN_BOUND_TO_MHC_MOLECULE_ON_ANTIGEN_PRESENTING_CELL	10352.8	10221.2	10118.8	10371.4	10207.9	10334.1	10196.7	10565.9	10690.9	9626.03	10837.4	10998	11036	10625.8	10317.3
GO_ESTABLISHMENT_OF_PROTEIN_LOCALIZATION_TO_ENDOPLASMIC_RETICULUM	10336.5	10475.8	10385.8	10359.5	10258.2	9826.58	9435.92	10505.8	9733.16	10082.1	10638.2	10313.6	9931.2	11009	10994.6
GO_TOLL_LIKE_RECEPTOR_2_SIGNALING_PATHWAY	10330	10674.6	10164.7	10713.3	10961	10325.1	10276	10574.1	10469.3	9873.18	10238.9	10406.9	10334.9	9664.02	9724.16
GO_REGULATION_OF_NEUTROPHIL_ACTIVATION	10319.3	10793.3	10580.9	10595.1	10437.8	11125.8	11098.1	10025	10543.7	9578.87	9868.24	9814.6	10200.9	8988.87	9339.79
GO_REGULATION_OF_FC_RECEPTOR_MEDIATED_STIMULATORY_SIGNALING_PATHWAY	10200.6	10735.9	10510.1	10543.7	10240.9	10614	10156.1	10344.4	10195.2	8917.81	9003.96	10206	9993.98	10007.1	8514.03
GO_REGULATION_OF_SUPEROXIDE_ANION_GENERATION	10166.4	10067.4	9828.58	10214.2	10124.4	10552.2	10507.7	10208.3	10295	10330.9	10329.6	9485.67	9586.26	9501.43	9886.17
GO_RESPONSE_TO_INTERLEUKIN_15	10114.4	10257.8	10107.1	10034.5	10132.9	10428.9	10281.1	10105.9	10180.5	8696.49	8788.13	10313.8	10121.7	9799.56	9586.36
GO_NEGATIVE_REGULATION_OF_LEUKOCYTE_DEGRANULATION	10109	9597.05	8939.71	10173.3	9730.07	10293.5	10349.8	10319.3	10438.8	8949.57	9827.34	10306.7	10447.4	9886.43	10044.7
GO_NUCLEAR_TRANSCRIBED_MRNA_CATABOLIC_PROCESS_NONSENSE_MEDIATED_DECAY	10089	10246.6	10135.8	10139.1	9986.1	9664.59	9237.35	10376.9	9523.62	10040.6	10490.9	10042.3	9705.75	10671.1	10869.4
GO_REGULATION_OF_PROTEIN_DEUBIQUITINATION	10083.8	10098.6	10075.5	10066.6	10044.9	9851.31	9830.53	10348.3	10311.8	10025	10293.2	10092	10109.6	9965.44	10266.2
GO_NEGATIVE_REGULATION_OF_INTERLEUKIN_12_PRODUCTION	10065.4	10190.1	10116.6	10181.8	10298.3	10041.9	10003.5	10088.9	10014.8	8031.96	9367.91	10590.5	10466	9499.97	9021.03
GO_PROTEIN_LOCALIZATION_TO_ENDOPLASMIC_RETICULUM	10062.8	10195.5	10091.3	10133.1	9984.92	9638.63	9294.74	10218.5	9542.71	9859.28	10314.5	10034.4	9721.51	10769.5	10739.2
GO_REGULATION_OF_NUCLEAR_TRANSCRIBED_MRNA_POLY_A_TAIL_SHORTENING	10024	9892.13	9842.32	10379.6	10245.9	10113.4	10120.3	10232.1	10024.9	10185.4	9830.68	9742.09	9985.54	10023.1	9264.67
GO_CELLULAR_RESPONSE_TO_ARSENIC_CONTAINING_SUBSTANCE	10021.1	9910.95	9877.91	10216.3	9932.28	9965.81	9723.53	10445.4	10483.4	10084.5	10236.9	10076.5	9767.98	10267.6	9722.37
GO_REGULATION_OF_TOLL_LIKE_RECEPTOR_2_SIGNALING_PATHWAY	9953.4	10342.6	9369.44	10470.1	10797.8	10125.1	10011.7	10317.4	10140.5	9638.54	9863.76	9895.06	9747.52	8898.3	9549.26
GO_HEPATOCYTE_APOPTOTIC_PROCESS	9917.74	9940.05	9957.3	9772.31	9447.13	9900.58	9850.85	9955.94	9934.9	10115	10197	9534.72	9617.98	9656.47	10250.2
GO_CELLULAR_RESPONSE_TO_NITROGEN_STARVATION	9894.07	10585.6	10489.5	10417.1	10391	10400.1	10131.1	9516.48	9294.92	10030.2	9413.78	8554.65	8509.3	9757.96	8992.89
GO_MRNA_TRANSCRIPTION	9880.06	10206	10311.9	10117.1	10259.1	9831.28	9692.13	9660.93	9928.84	9415.48	9786.3	9955.07	9977.81	9771.39	9752.16
GO_MRNA_TRANSCRIPTION_BY_RNA_POLYMERASE_II	9870.24	10193	10423.5	10078.8	10281.4	9968.6	9861.41	9634.48	9986.27	9406.31	9678.71	9845.47	9879.07	9621.77	9812.56
GO_REGULATION_OF_LEUKOCYTE_DEGRANULATION	9867.26	10010.2	9820.45	10102.8	9914.07	10100.6	10214.6	10112.8	10471	9399.44	9523.22	9450.15	9627.53	9512.99	9425.5
GO_CELLULAR_RESPONSE_TO_ESTROGEN_STIMULUS	9862.32	10110.4	9881.33	9843.32	10223.1	9897.91	9763.89	9546.36	9914.66	9643.31	9575.01	10325.1	10000.1	9542.87	9710.04
GO_POSITIVE_THYMIC_T_CELL_SELECTION	9858.06	9853.96	9898.84	9887.29	9862.16	9937.82	9743.18	10172.7	10129.1	3533.16	5488.94	9875.05	9846.59	8895.21	7776.89
GO_RESPONSE_TO_MUSCLE_STRETCH	9818.53	9902.98	10086.3	10055.3	10104	9907.6	9999.4	9689.62	9919.41	9502.59	9315.68	9220.1	9211.25	9734.08	9465.79
GO_PERK_MEDIATED_UNFOLDED_PROTEIN_RESPONSE	9790.74	9756	9874.9	9686.8	9639.32	9252.3	9077.36	10214.2	9825.47	10143.6	9829.53	9492.63	9155.57	10069.4	9985.06
GO_REGULATION_OF_GRANULOCYTE_DIFFERENTIATION	9786.85	9629.63	9603.56	9936.52	10027.3	9685.39	9784.43	10341.6	10369.1	9378.46	8324.93	9882.09	9789.26	9863.68	9159.58
GO_GLYCOLIPID_CATABOLIC_PROCESS	9779.45	10081.5	10428.9	10324.5	10090	9159.86	9110.95	9635.94	9973.18	8481.14	9356.12	9888.87	9670.04	10228.2	9264.89
GO_PEPTIDYL_SERINE_DEPHOSPHORYLATION	9773.9	9984.05	9911.03	10051.9	9976.64	9741.61	9638.74	9741.88	9679.37	9805.92	9833.24	9848.94	9660.83	9698.71	9626.79
GO_CELLULAR_RESPONSE_TO_INCREASED_OXYGEN_LEVELS	9750.94	9866.57	10226.3	10230.6	10416.5	9698.2	10046.5	9656.42	9729.7	9429.51	9601.63	9731.96	9769.92	9857.1	9164.89
GO_POSITIVE_REGULATION_OF_LEUKOCYTE_DEGRANULATION	9748.01	9877.67	9761.21	9977.08	9734.82	9874.48	10017.6	10061.1	10591.3	9306.25	9164.84	8908.02	9154.28	9113	8935.36
GO_REGULATION_OF_MYOBLAST_FUSION	9747.6	9669.08	9738.86	9524.16	9370.48	10183.4	10051.5	9938.41	9756.33	9299.28	9836.42	9954.69	10171.4	8907.87	7668.14
GO_NEUTROPHIL_HOMEOSTASIS	9731.37	9596.17	9066.97	10264.8	10088.2	9371.61	9276.13	9842.48	10196.3	8779.23	9419.71	9725.6	9739.87	9928.85	9737.14
GO_GERMINAL_CENTER_FORMATION	9722.79	10328.9	10188.8	9651	9461.07	9809.35	9738.97	10027.3	9684.91	8972.17	9706.61	10286.9	9784.07	8933.03	9201.09
GO_MYD88_DEPENDENT_TOLL_LIKE_RECEPTOR_SIGNALING_PATHWAY	9698.61	10137.5	10080	10265.4	10155.5	10246.7	10088	9268.22	9329.99	9411.88	9476.58	9541.18	9581.61	9815.61	9566.27
GO_NEGATIVE_REGULATION_OF_TISSUE_REMODELING	9681.2	9800.24	9567.15	9995.68	9701.16	9661.24	9607.04	10271.8	10282.9	8073.63	8867.47	10563.7	10536.2	9578.88	8258.67
GO_RESPIRATORY_BURST_INVOLVED_IN_DEFENSE_RESPONSE	9672.81	9817.9	9848.07	9758.34	10129.7	9623	9670.38	9488.11	9675.24	7740.63	9483.25	9982.83	10026.4	9149.5	8551.3
GO_REGULATION_OF_T_HELPER_2_CELL_DIFFERENTIATION	9666.2	9263.35	9224.87	9714.99	9547.3	9831.16	9785.47	9311.15	9606.67	8794.44	9712.66	9767.53	9631.64	9875.64	9700.75
GO_ANTIGEN_PROCESSING_AND_PRESENTATION_OF_EXOGENOUS_PEPTIDE_ANTIGEN_VIA_MHC_CLASS_I	9634.28	9633.03	9556.12	9704.46	9665.33	9666.25	9551.91	9635.54	9538.09	8961.72	9483.13	9785.36	9742.19	9795.78	9272.58
GO_TRANSLATIONAL_INITIATION	9622.16	9823.86	9701.34	9793.68	9542.99	9171.33	8701.09	9740.12	9042.43	9369.13	9861.04	9501.93	9129.88	10241.5	10381
GO_NUCLEOTIDE_BINDING_OLIGOMERIZATION_DOMAIN_CONTAINING_2_SIGNALING_PATHWAY	9620.91	9798.47	9415.62	9978.77	9816.35	9219.55	9284.21	9784.95	9978.34	9855.36	9650.36	9401.39	9324.6	9492.3	9591.45
GO_POSITIVE_REGULATION_OF_LEUKOCYTE_APOPTOTIC_PROCESS	9619.73	9493.24	9674.51	9817.41	9644.43	9382.57	9216.97	9900.55	9851.01	9078.62	8883.12	10137.8	9887.95	9595.03	8242.61
GO_T_HELPER_2_CELL_DIFFERENTIATION	9609.53	9590.84	9405.67	9693.68	9557.38	9957.65	9678.21	9490.21	9689.95	8094.85	9008.56	9750.02	9643.61	9628.22	9349.31
GO_RESPONSE_TO_INTERLEUKIN_12	9602.62	9605.44	9615.03	9576.23	9599.8	9585.04	9289.27	10001.6	9693.45	9328.4	9809.53	10022	9729.46	9552.85	9273.55
GO_POSITIVE_REGULATION_OF_NEUTROPHIL_MIGRATION	9589.29	9886.96	9688.18	9950.57	9987.89	9523.67	9713.68	9263.94	9421.88	8534.58	8469.11	9654.9	9376.97	9658.28	9344.51
GO_NEGATIVE_REGULATION_OF_ENDOPLASMIC_RETICULUM_UNFOLDED_PROTEIN_RESPONSE	9579.95	9347.45	9784.41	9703.41	9631.56	8779.39	8717.63	9677.74	9528.35	10058.4	9945.8	9440.46	9014.4	9718.37	9274.16
GO_NEGATIVE_REGULATION_OF_MRNA_SPLICING_VIA_SPLICEOSOME	9576.15	9688.75	9631.06	9395.68	9261.59	9351.62	9206.51	9679.25	9536.31	8929.76	9093.79	9671.89	9753.16	9666.09	9616
GO_NEGATIVE_REGULATION_OF_INTERLEUKIN_1_SECRETION	9569.63	9803.18	9992.05	10229.1	10090	9629.35	9900.49	9002.33	9243.6	8396.84	9125.61	9509.91	10004.2	8663.58	8908.66
GO_NUCLEOTIDE_BINDING_DOMAIN_LEUCINE_RICH_REPEAT_CONTAINING_RECEPTOR_SIGNALING_PATHWAY	9547.57	9699.81	9571.47	9753.55	9579.74	9266.86	9308.97	9725.82	9580.08	9626.34	9486.52	9523.66	9382.74	9483.46	9010.59
GO_POSITIVE_REGULATION_OF_MYELOID_LEUKOCYTE_MEDIATED_IMMUNITY	9536.75	9617.78	9535.78	9794.91	9537.71	9593.87	9621.27	9677.48	10013.5	8839.47	8850.97	8286.61	8463.73	8466.6	8783.83
GO_POSITIVE_REGULATION_OF_SPHINGOLIPID_BIOSYNTHETIC_PROCESS	9523.2	9099.33	8966.05	9441.31	9082.47	8265.64	8585.49	9636.48	9709.9	10144	9457.89	9909.64	9874.31	9588.5	9776.08
GO_INFLAMMATORY_RESPONSE_TO_WOUNDING	9485.16	9046.7	8726.71	9645.46	9161.91	9686.56	9567.31	9410.02	9768.65	7773.8	8807.03	9495.71	9474.62	9668.88	9807.71
GO_MYELOID_CELL_APOPTOTIC_PROCESS	9471.9	9610.35	9578.17	9422.08	9443.77	9380.82	9262.5	9926.56	9683.67	9463.39	9019.94	9694.51	9480.4	9496.45	9030.22
GO_NEGATIVE_REGULATION_OF_RNA_SPLICING	9470.74	9755.21	9652.26	9549.62	9391.86	9382.44	9226.64	9683.35	9354.88	9150.23	8930.82	9669.59	9618.5	9716.37	9351.64
GO_INTERFERON_GAMMA_MEDIATED_SIGNALING_PATHWAY	9461.22	9471.86	9258.63	9486.79	9461.7	9267.97	9310.97	10035.9	10337.8	9068.39	9460.75	10018.1	10036.9	9002.44	8961.92
GO_NUCLEAR_TRANSCRIBED_MRNA_CATABOLIC_PROCESS	9459.73	9620.44	9517.52	9463.13	9309.4	9087.74	8684.66	9718.43	8976.47	9352.99	9679.97	9456.32	9058.27	9904.22	9658.66
GO_POSITIVE_REGULATION_OF_REGULATORY_T_CELL_DIFFERENTIATION	9455.1	9448.51	9553.36	9473.81	9461.7	9417.39	9307.5	10308	10288	6707.46	7771.54	10081.7	10166.6	8674.83	8252.64
GO_ANTIGEN_PROCESSING_AND_PRESENTATION_OF_ENDOGENOUS_PEPTIDE_ANTIGEN	9449.42	8934.82	9059.82	9371.81	9194.79	9208.87	9555.24	9744.79	9635.72	8155.02	8749.73	9527.02	9612.36	9717.69	10364.7
GO_REGULATION_OF_VIRAL_ENTRY_INTO_HOST_CELL	9445.58	8712.58	8333.5	8956.57	8689.03	9181.38	9401.58	10239	10065.5	9489.58	9676.2	9946.9	10161.8	9170.46	9552.08
GO_REGULATION_OF_PLASMA_MEMBRANE_ORGANIZATION	9440	9502.44	9809.41	9009.53	8762.62	9655.34	9946.14	9377.57	9528.38	9315.75	7891.26	8531.93	8039.24	9592.63	10145.5
GO_NEGATIVE_REGULATION_OF_TRANSCRIPTION_FROM_RNA_POLYMERASE_II_PROMOTER_IN_RESPONSE_TO_STRESS	9428	9667.5	9421.33	9859.49	9479.35	8993.62	8794.25	9258.98	9187.98	10021.9	9542.88	9434.68	9248.59	9420.41	9656.83
GO_REGULATION_OF_B_CELL_APOPTOTIC_PROCESS	9423.31	9755.38	9949.2	9891.02	9652.06	9836.33	9470.08	9228.4	9140.29	8123.69	8189.39	9540.6	9376.55	8995.76	7933.67
GO_INTERLEUKIN_6_BIOSYNTHETIC_PROCESS	9420.44	9531.12	9377.69	9623.39	9320.26	10140.9	9967.51	9296.03	10176.1	8542.6	9184.72	9507.91	9463.2	8272.31	9245.1
GO_NEGATIVE_REGULATION_OF_INTERLEUKIN_1_BETA_SECRETION	9410.34	9711.83	9989.03	10249	10062.3	9326.04	9649.27	8871.94	9112.22	8148.57	9064.27	9494.64	10041.2	8445.85	8853.29
GO_REGULATION_OF_TRANSLATIONAL_INITIATION_IN_RESPONSE_TO_STRESS	9405.29	9672.1	9526.72	9763.15	9433.91	8706.07	8278.27	9160.75	8984.94	9641.48	9779.64	9009.73	8861.73	9645.9	9376.66
GO_POSITIVE_REGULATION_OF_MRNA_SPLICING_VIA_SPLICEOSOME	9397.67	9692.61	9725.81	9409.22	9273.24	9356.56	9182.86	9461.05	9349.67	8879.81	9206.39	9685.22	9730.38	9767.93	9386.12
GO_RESPONSE_TO_PEPTIDOGLYCAN	9393.16	9004.98	8958.84	9890.6	9322.05	8975.22	8941.39	9816.4	10618.1	8474.63	9464.26	9597.5	9909.08	9750.72	9278.28
GO_REGULATION_OF_TRANSLATION_IN_RESPONSE_TO_STRESS	9382.66	9595.74	9476.1	9747.08	9533.02	9031.66	8763.26	9197.56	9084.48	9514.66	9768.75	8957.85	8858.26	9615.24	9289.22
GO_RESPIRATORY_BURST	9379.43	9559.1	9391.02	9413.51	9367.83	8883.69	9063.99	9515.56	9445.73	7769.11	8667.45	9523.51	9535.6	8678.85	8799.27
GO_VIRAL_GENE_EXPRESSION	9356.55	9516.77	9373.07	9340.04	9270.83	9049.58	8602.78	9810.07	9073.24	9276.94	9470.64	9380.41	9042.43	9977.71	9923.51
GO_INTERLEUKIN_1_MEDIATED_SIGNALING_PATHWAY	9356.21	9457.85	9530.22	9460.01	9411.16	9225.85	9080.23	9510.12	9256.16	8920.34	9206.14	9510.2	9301.26	9675.09	9170.19
GO_MYD88_INDEPENDENT_TOLL_LIKE_RECEPTOR_SIGNALING_PATHWAY	9355.18	9392.4	9157.71	9461.5	9526.37	9179.98	9087.13	9709.04	9198.68	9329.28	9381.07	9642.1	9407.93	8781.16	8155.68
GO_REGULATION_OF_MYELOID_LEUKOCYTE_MEDIATED_IMMUNITY	9352.53	9512.11	9326.67	9691.93	9576.17	9539.1	9645.72	9378.4	9732.91	8580.11	8761.43	8451.11	8603.52	8878.94	8970.74
GO_MYELOID_LEUKOCYTE_MEDIATED_IMMUNITY	9352.52	9762.87	9601.07	9772.5	9678.72	9819.49	9836.07	9316.14	9280.98	8976.06	9053.41	9009.24	8829.61	9388.9	9195.3
GO_REGULATION_OF_EARLY_ENDOSOME_TO_LATE_ENDOSOME_TRANSPORT	9350.73	9372.43	9408.53	9402.67	9341.98	9248.7	9393.93	9096.95	9207.75	8656.71	8812.51	9359.49	9468.95	9401.4	9004.05
GO_POSTTRANSLATIONAL_PROTEIN_TARGETING_TO_ENDOPLASMIC_RETICULUM_MEMBRANE	9349.51	9755.93	9760.97	9908.27	9797.67	9026.46	8841.72	8882.33	9010.75	9331.67	8879.79	9751.96	8963.89	9604.4	9367.35
GO_PODOSOME_ASSEMBLY	9348.92	9500.68	9774.29	9328.38	9515.24	9166.03	9092.85	9087.96	9245.47	9219.1	9448.55	9164.66	9369.46	9489.89	9764.45
GO_PROTEASOMAL_UBIQUITIN_INDEPENDENT_PROTEIN_CATABOLIC_PROCESS	9340.26	9351.3	9149.33	9287.05	8974.8	9329.22	9219.34	10106.4	9175.42	9693.55	9979	9843.07	9425.62	9649.44	9079.13
GO_POSITIVE_REGULATION_OF_HETEROTYPIC_CELL_CELL_ADHESION	9335.26	9617.81	9165.48	10101.5	9670.51	8323.27	8318.04	10329.8	10172.3	9628.71	8859.18	9354.22	8946.73	9316.3	6753.22
GO_NEGATIVE_REGULATION_OF_MACROPHAGE_DERIVED_FOAM_CELL_DIFFERENTIATION	9325.71	9689.47	9364.98	9430.84	9415.21	8635.24	8338.64	9459.9	9856.98	7624.58	9286.44	9116.09	9022.41	9994.43	7033.08
GO_NEGATIVE_REGULATION_OF_INCLUSION_BODY_ASSEMBLY	9306.66	9838.07	9772.69	9977.98	10140.1	9009.45	8586.23	9343.79	9169.46	9651.2	8735.89	8999.32	8374.39	9269.53	10174.3
GO_ESCRT_COMPLEX_DISASSEMBLY	9303.54	9508.63	9583.16	9453.42	9478.17	9299.07	9308.02	9491.02	8784.89	9045.23	9003.78	9148.44	9182.79	9346.26	9132.76
GO_REGULATION_OF_PODOSOME_ASSEMBLY	9301.78	9554.69	9899.15	9306.34	9519.9	9024.44	8900.15	9187.22	9297.22	9255.93	9582.8	9058.19	9246.55	9557.42	9802.21
GO_REGULATION_OF_MAST_CELL_ACTIVATION	9301.73	9369.8	9376.23	9572.78	9305.63	9044.59	9027.16	9610.88	9934.46	8750.35	9102.41	9236.76	9297.83	9433.12	8304.55
GO_POSITIVE_REGULATION_OF_MEMBRANE_PROTEIN_ECTODOMAIN_PROTEOLYSIS	9299.81	9359.64	9306.76	9311.31	9027.11	8833.58	8786.1	10677.3	10640.3	8903.47	9810.44	9292.85	9232.4	8855.26	9874.92
GO_POSITIVE_REGULATION_OF_RNA_SPLICING	9294.26	9311	9392.82	9277.51	9099.76	9103.09	8932.19	9481.99	9365.13	8886.6	9103.45	9343.16	9443.43	9364.45	9161.08
GO_B_CELL_APOPTOTIC_PROCESS	9291.63	9473.4	9620.05	9575.85	9374.63	9567.14	9241.25	9220.52	9126.86	8140.15	8249.29	9437.25	9342.01	8739.1	7952.79
GO_REGULATION_OF_HETEROTYPIC_CELL_CELL_ADHESION	9290.88	10037	9871.38	10006.4	9826.93	8700.17	8978.32	9540.86	9621.25	9144.6	8809.62	9286.79	9294.97	9212.06	7954.52
GO_REGULATION_OF_RESPONSE_TO_INTERFERON_GAMMA	9290.79	9656.86	9111.77	9182.33	9462.36	9328.72	9310.75	9430.95	9739.89	7597.74	9028.88	9451.63	9270.84	8543.13	8226.69
GO_MACROPHAGE_ACTIVATION_INVOLVED_IN_IMMUNE_RESPONSE	9290.13	9232.21	9063.25	9156.83	9149.81	9411.03	9415.24	9349.08	8835.45	8470.43	9511.89	9378.13	9348.05	9488.05	8466.85
GO_MULTI_ORGANISM_MEMBRANE_ORGANIZATION	9289.16	8786.23	9007.65	9538.67	9250.43	9294.69	9310.7	9967.25	10271.8	8540.75	8826.01	9892.32	9908.89	9283.64	8307.76
GO_RESPONSE_TO_MURAMYL_DIPEPTIDE	9287.91	9138.68	9038.02	9535.71	9083.91	9353.19	9315.36	9772.03	10044.6	9469.24	8743.67	9062.72	9122.54	9279.2	9296.63
GO_REGULATION_OF_MAST_CELL_ACTIVATION_INVOLVED_IN_IMMUNE_RESPONSE	9286.82	9179.18	9199.96	9378.45	9227.9	9203.89	9376.62	9551.66	9802.65	9411.6	9345.74	8931.21	9041.07	9388.5	9196.82
GO_REGULATION_OF_AMYLOID_BETA_CLEARANCE	9272.1	9223.73	9349.89	9058.76	8920.69	9694.38	9227.86	9348.95	9851.24	7715.68	9316.34	9398.05	9463.82	8569.94	7599.78
GO_REGULATION_OF_PROTEIN_FOLDING	9271.02	9423.91	9689.59	9440.74	9205.31	9121.87	8832.08	8951.49	9277.62	9340.02	9173.69	9365.66	9329.73	9264.43	8176.35
GO_GLYCOLYTIC_PROCESS_THROUGH_FRUCTOSE_6_PHOSPHATE	9268.04	9362.6	9259.61	9545.98	9491.92	9687.3	9522.92	9085.41	9276.47	8626.84	8944.36	9201.53	9627.83	9187.98	8293.23
GO_NEGATIVE_REGULATION_OF_MYELOID_CELL_APOPTOTIC_PROCESS	9249.73	9236.83	9148.1	9132.61	8921.33	9287.38	9461.57	9888.83	9471.84	9428.69	9262.62	9297.93	9136.09	9015.65	8542.61
GO_LIPOPOLYSACCHARIDE_MEDIATED_SIGNALING_PATHWAY	9245.82	9554.12	9242	9605.77	9610.5	9249.64	9223.97	9385.65	9525.07	8598.36	8877.63	9353.96	9158.42	8745.12	8286.33
GO_RESPONSE_TO_ANGIOTENSIN	9239.25	9772.42	9749.2	10073.9	9925.65	9251.01	9227.5	8969.27	8950.45	7880.51	8113.48	9516.93	9397.99	8759.27	8353.42
GO_MHC_CLASS_II_BIOSYNTHETIC_PROCESS	9235.81	9595.61	9597.79	9872.93	9244.32	8979.88	8808.01	9227.3	9549.74	8185.27	8817.65	9978.23	9740.3	8403.48	7940.67
GO_POSITIVE_REGULATION_OF_TUMOR_NECROSIS_FACTOR_BIOSYNTHETIC_PROCESS	9231.02	9510.94	9244.61	9996.73	9569.95	9170.73	9217.43	9139.44	9602.09	7185.26	8854.63	9718.49	9425.27	9048.76	9077
GO_AMYLOID_BETA_CLEARANCE	9222.83	9224.87	9290.93	9183.64	9080.24	9588.53	9423.88	9289.55	9358.95	8388.16	9530.95	8875.81	9127.75	9220.79	8219.44
GO_MAST_CELL_MEDIATED_IMMUNITY	9220.92	9353.22	9175.38	9479.24	9266.45	9162.96	9280.43	9486.83	9796.07	8201.29	8411.91	9038.66	9107.28	9344.87	8253.14
GO_T_CELL_EXTRAVASATION	9220.12	8607.61	8271	9151.21	8888.29	9289.03	9388.14	9378.68	9314.57	8542.88	9597.77	9508.28	9502.21	9003.73	7386.79
GO_REGULATION_OF_NUCLEAR_TRANSCRIBED_MRNA_CATABOLIC_PROCESS_DEADENYLATION_DEPENDENT_DECAY	9218.17	9350.74	9404.77	9592.16	9258.19	8816.5	9449.23	9304.18	9178.15	9534.44	9173.5	9123.96	9143.72	8987.19	8159.15
GO_OLIGOSACCHARIDE_CATABOLIC_PROCESS	9216.44	9231.48	9763.72	9414.47	9203.77	7948.32	7810.38	8776.59	9496.19	6246.66	9075.16	9420.33	9229.11	9714.75	8287.66
GO_MAST_CELL_ACTIVATION	9215.3	9430.31	9264.61	9655.82	9325.7	9165.98	9150.91	9451.18	9681.69	8251.15	8605.26	9078.9	9107.71	9306.03	8059.15
GO_AEROBIC_ELECTRON_TRANSPORT_CHAIN	9198.07	9042.5	8878.51	9021.76	8919.65	9500.89	9095.99	9691.98	8086.53	9376.2	9954.49	9743.38	8729.45	9890.35	9300.16
GO_REGULATION_OF_TRANSCRIPTION_FROM_RNA_POLYMERASE_II_PROMOTER_IN_RESPONSE_TO_HYPOXIA	9194.13	9155.77	9061.75	9231.42	9111.07	9081.38	9067.64	9599.08	9118.17	9294.79	9655.86	9450.82	9197.79	9316.72	9190.46
GO_NUCLEAR_ENVELOPE_REASSEMBLY	9192.19	9279.75	9372.04	9500.41	9355.26	8872.17	8906.98	9249.38	9218.82	8713.33	8705.19	9351.75	9165.56	9042.07	8667.54
GO_NEGATIVE_REGULATION_OF_DNA_DAMAGE_RESPONSE_SIGNAL_TRANSDUCTION_BY_P53_CLASS_MEDIATOR	9191.09	9523.14	9341.8	9688.1	9470.59	8538.78	7711.95	8906.33	9428.08	9229.63	9406.29	9073.83	8846.78	9152.55	8256.02
GO_POSITIVE_REGULATION_OF_INTERLEUKIN_17_PRODUCTION	9179.71	9291.19	9141.45	9412.03	9217.96	8326.67	7967.75	9695.11	9818.55	5746.46	6655	10070.8	10037.4	8988.87	7085.4
GO_MITOTIC_NUCLEAR_ENVELOPE_REASSEMBLY	9178.99	9132.66	9295.79	9458.1	9425.12	8738.07	8556.66	9370.52	9225.32	8653.6	8752.2	9616.35	9411.04	8882.48	8232.1
GO_CELLULAR_RESPONSE_TO_ETHANOL	9177.97	8895.43	8473.1	9644.3	9786.65	9471.34	9560.83	8685.77	9117.6	8179.59	9238.34	9910.67	9961.15	8950.84	8218.68
GO_RESPONSE_TO_INTERLEUKIN_7	9174.83	9255.55	9028.62	9349.98	9338.13	9001.72	8858.88	9405.36	9273.49	8518.72	9259.31	9094.11	9259.2	8963.53	8426.55
GO_ANTIGEN_PROCESSING_AND_PRESENTATION_OF_PEPTIDE_ANTIGEN_VIA_MHC_CLASS_I	9173.42	9062.29	9043.15	9255.27	9166.31	9235.57	9130.12	9282.64	9180.53	8386.17	9157.15	9407.29	9363.26	9528.21	9012.21
GO_POSITIVE_REGULATION_OF_CHEMOKINE_BIOSYNTHETIC_PROCESS	9167.42	9132.4	9128.56	9789.59	9202.44	7505.18	7601.86	9494.14	9450.98	8210.33	9330.57	9794.5	9449.75	8722.74	8582.15
GO_DENDRITIC_CELL_ANTIGEN_PROCESSING_AND_PRESENTATION	9157.63	9192.3	9122.96	9902.57	9625.1	8556.93	8470.57	8833.4	9754.13	7093.69	8259.36	10610.9	10407	9538.36	8044.19
GO_MYELOID_LEUKOCYTE_ACTIVATION	9153.53	9482.12	9325.99	9557.85	9425.6	9548.14	9537.93	9182.81	9115.68	8635.79	8810.54	8901.32	8745.01	9124.25	8796.18
GO_ACTIVATION_OF_CYSTEINE_TYPE_ENDOPEPTIDASE_ACTIVITY	9139.45	8935.54	9229.15	8893.9	8968.8	9137.98	9135.99	9769.94	9492.21	9552.69	9276.98	9047.38	8947.96	9140.92	9149.37
GO_NEGATIVE_REGULATION_OF_VIRAL_ENTRY_INTO_HOST_CELL	9137.18	8203.07	8023.52	8589.66	8318.84	8846.86	9107.53	9697.65	9498.32	9166.84	9555.58	9634.95	9866.17	8496.43	9309.8
GO_POSITIVE_REGULATION_OF_GRANULOCYTE_CHEMOTAXIS	9128.15	9573.06	9124.27	9138.99	9479.23	8973.47	9388.02	9186.2	9090.01	7376.15	8035.63	9132.04	8251.95	8740.05	9434.08
GO_CHROMATIN_MEDIATED_MAINTENANCE_OF_TRANSCRIPTION	9127.22	9436.68	9468.43	9019.71	9009.34	9144.12	8986.98	9125.47	9411.74	7382.93	8572.16	9273.32	9377.65	9128.98	8705.47
GO_CHAPERONE_MEDIATED_AUTOPHAGY	9121.42	9181.06	9061.77	9521.68	9303.79	8746.04	8503.56	9459.87	9189.4	8742.99	8190.29	9672.8	9491.01	8581.31	8494.65
GO_POSITIVE_REGULATION_OF_INTERLEUKIN_8_SECRETION	9121.27	9216.03	8975.94	9754.38	9606.72	9501.87	9410.31	9026.5	9645.5	6580.85	6721.56	9015.62	9012.33	9472.2	8215.68
GO_POSITIVE_REGULATION_OF_CYTOKINE_PRODUCTION_INVOLVED_IN_INFLAMMATORY_RESPONSE	9107.29	9070.27	9108.33	9106.24	9332.88	9526.72	9547.24	8948.11	9027.7	7692.06	8241.49	9159.19	9452.49	9290.58	8667.29
GO_RESPONSE_TO_HYDROPEROXIDE	9107.05	9427.92	8773.72	9223.7	8730.52	9363.23	9685.68	8535.19	9108.42	8483.38	8941.3	9231.14	9375.37	9105.69	6540.06
GO_IMMUNOLOGICAL_SYNAPSE_FORMATION	9106.59	8957.54	8780.76	9583.45	9378.37	8890.56	8794.58	9342.27	10026.5	6840.61	8112.06	10438.8	10345.8	9255.64	7310.58
GO_POSITIVE_REGULATION_OF_MACROPHAGE_CHEMOTAXIS	9105.55	9200.03	8950.63	8721.41	8440.89	8906.04	9455.81	10266	10109.8	9365.87	9231.47	8994.23	9011.06	9518.83	8389.33
GO_CELL_CELL_ADHESION_INVOLVED_IN_GASTRULATION	9102.72	10150.2	10261.4	9720.22	9837.67	9015.54	9366.5	8527.26	8889.11	8477.83	8526.15	9136.86	9541.47	9068.59	8848.92
GO_PROTEIN_TARGETING_TO_LYSOSOME	9092.59	9715.37	9048.86	9276.54	9136.32	9552.24	9318.53	8707.21	8382.29	8994.31	9022.13	9257.23	8932	9170.28	7711.72
GO_INFLAMMATORY_CELL_APOPTOTIC_PROCESS	9088.59	9380.27	9515.09	9047.79	9105.16	9072.02	8845.43	9922.12	9960.92	8010.89	7769.84	9899.58	9851.67	8797.29	8331.88
GO_RESPONSE_TO_STEROL_DEPLETION	9082.53	9719.36	9523.88	9385.26	9510.07	9213.03	9218.94	8536.59	8687.09	8924.37	8492.98	8952.03	8693.36	9547.63	8417.4
GO_RESPONSE_TO_ARSENIC_CONTAINING_SUBSTANCE	9076.2	9190.86	9090.31	9132.67	9048.96	9168.74	8817.42	8990.36	9364.31	9050.77	9467.63	9062.1	8668.32	9540.54	8436.69
GO_RESPONSE_TO_INTERLEUKIN_2	9071.34	9079.55	9162.59	9461.32	9600.14	9467.77	9532.7	8758.07	8691.42	5834.5	7704.39	9131.91	9063.14	8399.92	8917.45
GO_POSITIVE_REGULATION_OF_OSTEOCLAST_DIFFERENTIATION	9070.62	9224.51	9436.46	9550.12	9086.29	8130.6	8139.3	9270.02	9620.02	6800.1	8457.65	9164.59	9054.95	8896.44	6856.14
GO_NEGATIVE_REGULATION_OF_LEUKOCYTE_MEDIATED_CYTOTOXICITY	9069.15	9121.21	9017.08	9143.13	8881.1	9556.34	9633.9	10012.2	8967.29	6245.02	8047.2	9451.15	9641.6	8060.65	8489.97
GO_INTERLEUKIN_27_MEDIATED_SIGNALING_PATHWAY	9064.79	9132.95	8866.39	9385.26	9498.31	8950.37	8882	10056.5	9860.89	8571	8996.64	9490.85	9484.36	7847.39	6758.47
GO_NEGATIVE_REGULATION_OF_CELL_KILLING	9056.96	9241.32	9006.31	8925.39	8592.76	9499.54	9561.8	10162.9	9107.6	6409.18	8199.56	9494.19	9517.05	8253.99	8873.82
GO_VIRION_ASSEMBLY	9055.78	9204.7	9358.85	8902.41	8995.15	8872.93	8824.13	9269.12	8936.1	9106.33	9251.84	9005.23	8979.08	9345.04	9231.22
GO_NEGATIVE_REGULATION_OF_REGULATED_SECRETORY_PATHWAY	9054.54	8666.93	8256.56	9715.69	9389.1	9760.81	9781.3	8664.73	9234.55	7489.72	8096.14	9261.18	9166.2	8829.03	8942.89
GO_PROTEIN_TARGETING_TO_MEMBRANE	9052.79	9049.67	9086.35	9055.91	8816.21	8624.29	8285.66	9610.35	8828.25	9132.13	9521.36	9036.99	8810.12	9609.85	9764.44
GO_REGULATION_OF_NEUTROPHIL_MIGRATION	9040.73	9297.27	9091.85	9493.44	9471.23	9231.03	9409.2	8698.46	8930.26	8264.85	8219.83	8775.54	8516.18	9345.43	8989.61
GO_AMYLOID_FIBRIL_FORMATION	9035.04	9071.55	8870.79	9216.75	9098.31	8852.5	8844.45	8790.57	9175.25	8559.94	9580.51	9609.14	9841.62	8998.54	7409.67
GO_PENTOSE_METABOLIC_PROCESS	9024.93	8971.5	9342.36	9415.16	9256.54	9559.28	9779.77	8750.19	9310.36	6938.67	8110.41	8565.25	9078.36	8405.7	8717.93
GO_ENTRY_OF_BACTERIUM_INTO_HOST_CELL	9017.66	8997.06	8525.33	8273.4	8135.9	8181.09	8266.2	9639.59	9696.27	9038.25	9621.69	9401.58	8524.35	9325.65	9338.6
GO_ENGULFMENT_OF_APOPTOTIC_CELL	9015.27	9311.6	9701.96	9397.08	8998.54	8517.6	8885.48	8648.46	9247.49	7842.61	8356.03	9031.99	9313.27	9089.89	8954.1
GO_TUMOR_NECROSIS_FACTOR_BIOSYNTHETIC_PROCESS	9015.23	9045.63	8494.17	9782.2	9099.64	9295.43	9256.94	8452.93	8984.83	6836.16	8213.19	9123.06	9193.99	8113.65	8362.79
GO_REGULATION_OF_SUPEROXIDE_METABOLIC_PROCESS	9011.49	8746.42	8447.75	9025.82	9000.26	9321.64	9188.18	9069.79	9458.62	8823.87	9285.73	8195.44	8206.76	8667.4	9022.72
GO_REGULATION_OF_PROTEIN_K63_LINKED_UBIQUITINATION	9010.65	9102.82	9082.98	9240.2	9320.53	8974.65	9046.65	8860.32	8847	8464.74	7900.77	9502.2	9645.41	8664.51	8613.5
GO_RESPONSE_TO_INTERFERON_ALPHA	9005.06	9062.29	8404.88	8893.99	9121.95	9173.15	8947.83	9779.01	9663.96	8597.1	8583.48	10161.1	10010.1	8109.79	7627.54
GO_NEGATIVE_REGULATION_OF_MRNA_PROCESSING	9004.21	9135.73	9009.29	8999.12	8503.27	8890.18	8760.92	9456.94	9305.05	8494.04	8725.59	9387.3	9522.73	8994.05	9090.66
GO_ORGANELLE_INHERITANCE	8993.62	9067.82	8751.34	9086.85	9007.68	9188.23	9258.45	8791.96	8364.31	9017.07	8715.01	9270.69	8979.56	8112.22	8146.43
GO_RESPONSE_TO_LAMINAR_FLUID_SHEAR_STRESS	8989.5	9124.31	9059.96	8699.37	8688.91	8141.1	8838.2	9929.2	9893.68	7890.65	7043.24	9053.26	9225.96	9299.43	8925.75
GO_POSITIVE_REGULATION_OF_LYMPHOCYTE_APOPTOTIC_PROCESS	8985.48	8498.4	8952.29	9571.72	9018.67	8701.73	8624.62	9731.25	9682.03	8125.48	8871.69	10076.7	9702.68	9246.81	6567.71
GO_ER_NUCLEUS_SIGNALING_PATHWAY	8976.13	8887.05	9038.98	8980.11	8823.61	8472.3	8187.58	9306.95	9077.92	9478.4	9155.59	8972.15	8673.42	9600.8	8574.6
GO_RESPONSE_TO_INCREASED_OXYGEN_LEVELS	8963.5	9729.98	9937.7	9660.53	9613.23	8907.15	8960.31	8966.69	8917.63	8656.55	9053.6	8866.74	8789.56	9093.58	8785.04
GO_POSITIVE_REGULATION_OF_MONOCYTE_DIFFERENTIATION	8962.22	8455.94	8049.02	9020.53	8325.52	8903.91	9108.1	8532.95	8535.53	9245.09	10212.7	9164.83	9117.37	9525.67	8725.23
GO_GOLGI_LOCALIZATION	8959.47	8867.02	9119.04	8958.88	9015.92	8904.29	8927.61	9094.66	8935.09	8839.12	8069.91	8960.07	8976.91	9096.66	9442.41
GO_REGULATION_OF_INTEGRIN_MEDIATED_SIGNALING_PATHWAY	8945.37	9023.36	8851.36	9275.76	8976.9	9076.76	9139.56	9432.39	9340.51	8419.09	8841.55	7943.33	8138.8	8913.83	7857.71
GO_NITRIC_OXIDE_SYNTHASE_BIOSYNTHETIC_PROCESS	8944.25	8987.19	9310.36	9007.18	9011.65	8986.56	8901.93	8345.57	8429.84	7153.84	8774.2	9086.01	8987.38	8681.24	8156.38
GO_VITAMIN_D_BIOSYNTHETIC_PROCESS	8938.27	9708.25	9897.79	8986.46	8890.09	8415.62	7664.2	9712.41	9751.61	5459.88	7864.04	10119.2	9610.35	8670.6	6386.59
GO_PROTEIN_LOCALIZATION_TO_LYSOSOME	8935.28	9322.16	9070.45	8885.65	8910.31	8859.38	8709.42	8495.11	8610.58	9002.18	9026.6	9052.03	8960.25	9034.24	8133.84
GO_ATP_BIOSYNTHETIC_PROCESS	8934.75	9195.89	9103.93	9310.64	9106.28	8895.66	8923.98	9009.77	8538.8	8632.04	8945.51	8631.88	8318.1	9350.01	8630.22
GO_VIRAL_LATENCY	8932.37	8905.28	8924.74	8903.95	8909.51	9029.57	8799.78	9397.16	8940	8403.12	9037.18	9412.56	9074.71	9346.68	8686.32
GO_IRES_DEPENDENT_VIRAL_TRANSLATIONAL_INITIATION	8928.14	9189.71	9067.9	8841.37	8645.38	8518.26	7886.76	8902.73	8702.76	8522.68	9096.27	8953.55	9529.35	9378.42	9142.48
GO_REGULATION_OF_LYSOSOMAL_LUMEN_PH	8923.9	8924.16	8923.64	9523.88	9087.49	9431.7	9612.85	8453.01	8762.13	7899.82	8688.69	9190.35	8966.63	8856.65	8227.77
GO_POSITIVE_REGULATION_OF_NITRIC_OXIDE_SYNTHASE_BIOSYNTHETIC_PROCESS	8917.06	8791.53	9044.7	9099.91	9042.59	9348.72	9282.68	8284.13	8669.69	6663.47	8642.3	9168.25	9092.07	8464.06	7977.14
GO_POSITIVE_REGULATION_OF_T_CELL_CYTOKINE_PRODUCTION	8914.21	9133.61	8939.28	9260.45	9355.49	8309.44	8143.94	8779.15	8889.13	6893.77	7889.5	9273.07	9125.57	9020.89	7761.54
GO_CELLULAR_RESPONSE_TO_LOW_DENSITY_LIPOPROTEIN_PARTICLE_STIMULUS	8904.14	9293.38	9247.89	8742.49	8896.37	8685.4	8911.91	8160.93	8817.33	8097.85	9284.41	9040.43	8985.13	10153.7	7256.53
GO_NEGATIVE_REGULATION_OF_B_CELL_APOPTOTIC_PROCESS	8903.99	9224.59	9572.31	9431.1	9105.17	9143.68	8622.43	8702.81	8613.05	6993.03	7433.99	9282.04	9200.4	8034.03	7325.85
GO_CYTOPLASMIC_TRANSLATION	8899.65	9039.36	8833.98	8965.33	8718.01	8523.43	8000.26	9222.01	8169.92	9031.73	9283.25	8747.48	8377.63	9674.35	9423.48
GO_REGULATION_OF_OXIDATIVE_STRESS_INDUCED_INTRINSIC_APOPTOTIC_SIGNALING_PATHWAY	8897.67	8716.25	8845.05	8950.28	8612.43	9010.59	8641.41	9037.92	8758.27	9070.87	9531.35	8356.22	8277.55	8969.26	9488.91
GO_NEGATIVE_REGULATION_OF_PHAGOCYTOSIS	8893.32	9606.08	9072.52	9049.87	9720.65	9862.04	9311.99	8886.49	8328.1	7409.47	8064	8900.15	8357.86	8192.77	8285.55
GO_REGULATION_OF_DEACETYLASE_ACTIVITY	8890.55	9008.31	9018.12	9393.04	8877.19	8954.91	9218.95	8873.62	8903.91	8399.26	7717.54	8801.63	8739.21	8614.66	9431.22
GO_REGULATION_OF_DEFENSE_RESPONSE_TO_VIRUS_BY_VIRUS	8887.91	9086.44	8895.46	8708.68	8936.49	8918.93	8629.05	9596.45	9500.92	7019.84	7056.35	9082.65	8880.36	8667.18	7785.43
GO_POSITIVE_REGULATION_OF_TOLL_LIKE_RECEPTOR_SIGNALING_PATHWAY	8882.45	8983.08	8810.85	9341.25	9349.01	9289.85	9333.2	8954.05	9051.26	8743.07	8392.32	8279.55	8142.45	7705.35	7909.51
GO_CYTOPLASMIC_PATTERN_RECOGNITION_RECEPTOR_SIGNALING_PATHWAY	8881.34	9049.84	8712.4	9073.94	8876.12	8767.97	8812.5	9261.14	8886.56	9076.12	8908.44	9014.34	8848.48	8730.45	8598.28
GO_POSITIVE_REGULATION_OF_PODOSOME_ASSEMBLY	8878.38	8957.57	9391.31	9101.7	9054.28	8413.31	8026.11	8647.38	8594.26	8613.01	9003.91	8760.29	8799.2	9109.21	9167.59
GO_REGULATION_OF_PERK_MEDIATED_UNFOLDED_PROTEIN_RESPONSE	8878.07	8591.82	8947.15	8934.88	8346.09	8113.19	8279.86	9510.85	8851.85	9406.23	8904.3	8440.02	8363.84	8960.7	9902.93
GO_LYSOSOME_LOCALIZATION	8874.99	8825.98	8924	8981.93	8694.6	8995.65	9161.74	9134.67	9372.33	8223.97	8031.1	8458.61	8405.71	8943.54	8547.16
GO_POSITIVE_REGULATION_OF_INTERLEUKIN_2_PRODUCTION	8871.31	9016.59	8644.93	9348.46	8872.82	8755.1	8668.11	9407.39	9229.47	7230.38	7912.44	9349.93	9051.64	8869.81	7651.61
GO_POSITIVE_REGULATION_OF_INTRINSIC_APOPTOTIC_SIGNALING_PATHWAY	8870.63	8903.96	8844.56	8896.7	8681.28	8468.85	8461.39	9403.19	8900.29	9138.61	8999.28	8691.63	8691.13	9003.7	8578.37
GO_REGULATION_OF_ACUTE_INFLAMMATORY_RESPONSE_TO_ANTIGENIC_STIMULUS	8857.68	9065.43	8717.05	9152	9124.14	7697.16	8045.07	9644.81	9117.09	7634.62	9049.86	8245.37	8341.9	8998.31	8211.9
GO_RNA_CATABOLIC_PROCESS	8857.66	8956.3	8830.75	8862.94	8726.33	8712.65	8334.34	9391.9	8767.29	8802.95	9041.68	9119.62	8852.39	9321.4	9119.47
GO_REGULATION_OF_SPHINGOLIPID_BIOSYNTHETIC_PROCESS	8843.84	8844.13	8733.16	9205.82	8671.4	8288.58	8574.4	9158.22	9269.04	9030.44	8843.55	9303.28	9363.49	8843.06	8356.66
GO_REGULATION_OF_RNA_POLYMERASE_II_REGULATORY_REGION_SEQUENCE_SPECIFIC_DNA_BINDING	8841.01	8409.29	8966.11	8589.23	8715.91	8597.23	8623.01	9324.36	9332.69	9015.86	9014.24	7759.63	8151.03	9552.25	9558.95
GO_POSITIVE_REGULATION_OF_TYPE_I_INTERFERON_PRODUCTION	8840.46	8849.3	8655.87	9006.93	8908.74	8910.04	8792.02	9014.33	8831.62	8707.05	8580.42	8910.78	8914.23	8651.04	8300.74
GO_POSITIVE_REGULATION_OF_T_CELL_RECEPTOR_SIGNALING_PATHWAY	8839.68	8779.24	8998.5	9742.4	8900.13	8637.89	7594.16	9892.45	9855.94	4056.93	5736.55	9466.08	9418.09	8630.35	5129.11
GO_NEGATIVE_REGULATION_OF_CD4_POSITIVE_ALPHA_BETA_T_CELL_DIFFERENTIATION	8839.41	8329.08	8278.15	8710.92	8542.63	9142.94	8967.9	8988.65	9249.82	6918.2	8089.05	9090.37	9282.5	9102.65	8337.41
GO_NEGATIVE_REGULATION_OF_I_KAPPAB_KINASE_NF_KAPPAB_SIGNALING	8835.72	9059.35	8996.07	8828.38	8843.06	8697.61	8739.91	9321.09	9020.56	8511.74	8749.49	9217.81	8935.27	8621.53	8270.77
GO_REGULATION_OF_T_CELL_RECEPTOR_SIGNALING_PATHWAY	8833.27	8775.05	8760.19	9226.99	8891.48	9103.79	8494.25	9650.22	9902.52	6553.25	7192.37	9379.54	9295.34	8590.92	6909.69
GO_3_UTR_MEDIATED_MRNA_STABILIZATION	8831.88	8766.97	8492.92	8949.06	8872.01	9244.87	9106.2	9288.04	8777.74	9581.21	9452.15	8648.94	8638.93	8711.88	8791.75
GO_POSITIVE_REGULATION_OF_HISTONE_DEACETYLATION	8831.65	8697.9	8541.71	9112.97	8839.29	9116.82	9367.99	9047.56	8824	8850.67	8633.12	8291.06	8492.99	8710.19	9906.84
GO_PROTEIN_LOCALIZATION_TO_VACUOLE	8830.86	9277.84	9045.69	8945.96	8952.36	8777.87	8806.47	8571.27	8681.94	8777.54	8754.64	8855.25	8893.9	8962.2	8226.6
GO_MACROPINOCYTOSIS	8826.83	8946.29	8792.67	8663.52	8566.84	8676.12	8860.98	9440.48	8941.15	8967.66	7574.32	9330.43	9433.47	8445.52	8188.84
GO_REGULATION_OF_DNA_TEMPLATED_TRANSCRIPTION_IN_RESPONSE_TO_STRESS	8825.69	8780.27	8789.51	8859.45	8743.77	8781.44	8667.93	9268.18	8791.92	9131.49	9381.68	9000.49	8769.27	8969.29	8951.98
GO_NEGATIVE_REGULATION_OF_T_CELL_RECEPTOR_SIGNALING_PATHWAY	8822.17	8632.62	8524.11	8888.73	8770.24	9292.08	8874.1	9706.95	10220.8	7563.6	7902.35	9443.48	9340.53	8414.15	7940.73
GO_AUTOPHAGOSOME_MATURATION	8821.66	9206.72	9032.48	9218.29	9053.85	9135.43	9210.84	8390.8	8440.93	8256.21	8542.54	8610.85	8590.42	9038.12	7927.09
GO_TOLL_LIKE_RECEPTOR_4_SIGNALING_PATHWAY	8821.55	9337.62	8937.6	8865.61	9369.71	8552.76	8528.87	8991.44	8839.66	7871.13	8517.5	8853.98	8803.45	7845.15	7332.92
GO_3_UTR_MEDIATED_MRNA_DESTABILIZATION	8816.64	8101.16	7929.64	8510.81	8129.99	8620.81	8712.9	9944.92	9576.36	8845.75	8987.93	9258.95	9318.94	8787.52	9245.8
GO_INTERLEUKIN_7_MEDIATED_SIGNALING_PATHWAY	8816.08	8892.64	8760.73	8853.86	9037.95	8665.12	8587.01	9253.55	8888.56	8031.9	8856.5	8778.3	8989.78	8226.68	7541.74
GO_ESTABLISHMENT_OF_PROTEIN_LOCALIZATION_TO_VACUOLE	8814.63	9311.01	8902.75	8982.8	8900.99	8911.84	8954.81	8528.22	8473.07	8613.18	8578.99	8728.26	8720.76	8922.16	7943.91
GO_VIRAL_TRANSLATION	8812.14	9119.54	9004.09	8813.75	8607.83	8510.02	7970.37	8810.54	8630.67	8474.21	8908.41	8716.75	9167.17	9320.42	9436.35
GO_CELL_ACTIVATION_INVOLVED_IN_IMMUNE_RESPONSE	8810.5	9057.06	8854.34	9191.44	9047.45	9202.94	9122.27	8746.97	8666.28	7991.07	8258.71	8845.56	8612.38	8775.44	8540.18
GO_RESPONSE_TO_INTERFERON_GAMMA	8806.66	8717.68	8573.42	8953.88	8895.65	8460.42	8570.53	9248.7	9356.73	8360.02	8996.32	9516.21	9387.41	8620.63	8325.85
GO_MACROPHAGE_APOPTOTIC_PROCESS	8806.16	9263.94	9357.8	8566.97	8753.24	8820.84	8571	9997.5	9811.37	8791.47	7780.94	10126.9	10096.2	8678.92	7691.19
GO_TOLL_LIKE_RECEPTOR_SIGNALING_PATHWAY	8805.48	9086.35	8995.66	9076.31	9146.4	8897.29	8770.22	8769.26	8841.77	8143.24	8462.15	8768.77	8840.75	8449.42	8153.78
GO_CHEMOKINE_C_X_C_MOTIF_LIGAND_2_PRODUCTION	8802.5	9018.5	8801.29	9284.76	9355.2	7580.9	7640.84	7988.11	8803.72	7578.91	8364.66	9038.45	8849.56	9125.31	8006.51
GO_POSITIVE_REGULATION_OF_T_CELL_APOPTOTIC_PROCESS	8802.14	7868.4	8516.08	9431.85	8765.76	8291.28	8260.92	9704	9687.36	7840.98	8838.52	10189.2	9727.44	9024.35	6387.03
GO_POSITIVE_REGULATION_OF_INTERLEUKIN_2_BIOSYNTHETIC_PROCESS	8798.84	9081.3	8585.25	9389.12	8598.64	8760.35	8474.23	9267.52	9183.11	4716.37	5874.59	9544.34	8837.33	9112.41	6513.18
GO_RELAXATION_OF_CARDIAC_MUSCLE	8798.33	8502.36	8501.54	9094.38	8911.23	9154.78	9056.78	8380.63	8660.55	8552.48	8812.96	9046.68	8783.7	8894.54	7782.74
GO_POSITIVE_REGULATION_OF_CELL_SUBSTRATE_JUNCTION_ORGANIZATION	8789.8	8927.63	8879.87	8837	8745.44	8052.26	8285.07	8841.02	8563.77	9445.38	8834.16	8379.19	8077.54	8870.4	7990.36
GO_REGULATION_OF_SYNCYTIUM_FORMATION_BY_PLASMA_MEMBRANE_FUSION	8786.78	8751.54	8705.48	8885.42	8743.66	9240.32	9327.62	8745.29	8822.02	8154.9	9159.15	9461.32	9543.07	8568.33	7439.37
GO_POSITIVE_REGULATION_OF_TRANSCRIPTION_FROM_RNA_POLYMERASE_II_PROMOTER_IN_RESPONSE_TO_ENDOPLASMIC_RETICULUM_STRESS	8782.03	8859.75	9226.7	8663.47	8424.68	8593.54	8201.25	9666.56	9630.14	9210.8	8608.34	8704.32	8499.63	10270.3	9139.74
GO_ANTIGEN_PROCESSING_AND_PRESENTATION_OF_PEPTIDE_ANTIGEN_VIA_MHC_CLASS_IB	8778.78	8246.42	8208.57	8605.77	8424.2	8350.23	9052.73	9217.19	9456.47	6940.91	7556.63	8951.79	9148.62	9216.28	10521.1
GO_LIPOPROTEIN_CATABOLIC_PROCESS	8777.24	8721.61	8729.01	8726.96	8541.35	9040.07	9222.73	8994.53	8840.23	8348.78	8825.47	8994.8	8692.03	9557.54	7479.53
GO_POSITIVE_REGULATION_OF_MAST_CELL_ACTIVATION	8776.39	8802.51	8887.04	9340.09	8719.56	7789.9	7635.13	9682.46	10367.7	7151.74	7813.25	8750.27	8890.55	9077.04	7010.83
GO_POSITIVE_REGULATION_OF_CYTOKINE_PRODUCTION_INVOLVED_IN_IMMUNE_RESPONSE	8775.8	9138.75	9000.79	9117.4	9070.19	8565.98	8453.76	8706.08	8845.51	7063.85	7729.65	9196.97	9104.87	8594.15	7915.11
GO_NEGATIVE_REGULATION_OF_EXTRINSIC_APOPTOTIC_SIGNALING_PATHWAY_VIA_DEATH_DOMAIN_RECEPTORS	8771.53	8893.86	8649.21	8557.33	8583.38	8985.77	9120.78	9458.35	9762.83	8307.87	8489.16	9087.91	8915.57	8355.12	7861.42
GO_POSITIVE_REGULATION_OF_TRANSCRIPTION_FROM_RNA_POLYMERASE_II_PROMOTER_IN_RESPONSE_TO_STRESS	8770.09	8597.23	8895.59	8769.41	8747.99	8770.78	8668.64	9117.95	8958.59	9328.52	9207.35	8498.01	8478.24	8953.28	8692
GO_REGULATION_OF_MODIFICATION_OF_SYNAPTIC_STRUCTURE	8769.3	8507.58	8887.72	8211.1	8650.87	8599.31	8335.18	9477.59	9131.26	9378.03	9102.16	8645.52	9289.36	9026.97	8173.8
GO_POSITIVE_REGULATION_OF_ATP_BIOSYNTHETIC_PROCESS	8765.59	9115.85	8638.62	9059.49	8892.56	9210.14	9089.79	8319.63	7521.94	7829.66	8961.2	8196.77	7419.61	9571.5	8350.44
GO_VESICLE_CARGO_LOADING	8759.32	9078.52	8772.5	9217.51	9250.28	8746.14	8554.19	8518.58	8272.07	8191.33	8270.7	8882.67	8809.54	9213.53	8591.39
GO_REGULATION_OF_NEUTROPHIL_CHEMOTAXIS	8758.65	8943.97	8670.7	9269.14	9274.9	8846.61	9047.49	8277.96	8491.64	7827.96	7765.73	8408.93	8058.47	8975.41	9017.88
GO_NEGATIVE_REGULATION_OF_NATURAL_KILLER_CELL_MEDIATED_IMMUNITY	8755.69	8779.11	8728.67	8732.28	8313.69	9393.33	9464.47	9865.09	8787.41	5110.42	6852.7	9370.19	9630.39	7451.69	7615.71
GO_TOLL_LIKE_RECEPTOR_3_SIGNALING_PATHWAY	8749.57	8403.75	8311.47	8660.28	8612.96	8280.96	8381.37	9041.25	9345.34	8838.86	9188.07	9088.49	9195.13	8857.16	8064.98
GO_SUBSTANTIA_NIGRA_DEVELOPMENT	8749.36	8668.47	8852.61	8459.82	8448.78	8658.28	8647.56	9202.33	8868.35	8633.83	8859.6	8802.12	8696.61	9193.04	9371.56
GO_NEGATIVE_REGULATION_OF_ANDROGEN_RECEPTOR_SIGNALING_PATHWAY	8745.59	8652.55	8619.71	8147.08	8200.92	8838.63	8650.42	9182.09	9385.25	8490.52	8956.73	9121.9	9138.87	9005.86	8566.19
GO_EXTRINSIC_APOPTOTIC_SIGNALING_PATHWAY_VIA_DEATH_DOMAIN_RECEPTORS	8745.12	8745.38	8744.86	8737.12	8679.91	8746.86	8851.22	9345.88	9350.51	8501.98	8424.6	8838.78	8578.32	8878.21	8719.5
GO_NEGATIVE_REGULATION_OF_AMYLOID_PRECURSOR_PROTEIN_CATABOLIC_PROCESS	8743.55	9055.87	8642.6	8941.06	8574.11	9606.71	9531.61	8515.23	9440.76	8167.86	8879.55	8397.52	8771.11	8715.99	8632.48
GO_TOLERANCE_INDUCTION	8741.29	8417.64	7900.54	9083.99	8783.09	9152.18	8699.49	9607.05	9213.11	5312.85	6925.77	9200.98	8801.19	8165.64	6052.4
GO_POSITIVE_REGULATION_OF_RESPONSE_TO_OXIDATIVE_STRESS	8737.32	8725.75	8611.95	8860.69	8624.99	8628.48	8521.45	9499.48	9741.92	9020.75	9811.5	8748.89	8551.1	8680.23	9481.41
GO_CHAPERONE_COFACTOR_DEPENDENT_PROTEIN_REFOLDING	8736.49	8950.39	8940.43	9301.8	9204.51	8158.88	7717.26	9204.8	8407.7	9041.95	8532.54	8951.98	8323.47	8431.33	8291.32
GO_REGULATION_OF_KERATINOCYTE_MIGRATION	8733.05	8376.1	8210.42	8628.54	8478.27	8803.59	8910.63	9714.58	9051.2	9915.68	9607.81	7598.03	7244.82	8662.51	8821.36
GO_CELLULAR_RESPONSE_TO_LIPOPROTEIN_PARTICLE_STIMULUS	8729.14	8751.76	8742.47	8715.82	8692.58	8328.35	8618.93	8302.64	8841.92	7592.77	8981.07	8861.82	8807.5	9700.8	7694.68
GO_REGULATION_OF_EXTRINSIC_APOPTOTIC_SIGNALING_PATHWAY_VIA_DEATH_DOMAIN_RECEPTORS	8723.65	8844.39	8748.39	8679.5	8651.34	8698.92	8865.72	9421.75	9321.8	8500.64	8566.84	8963.41	8667.27	8798.14	8525.5
GO_NEGATIVE_REGULATION_OF_PROTEIN_AUTOPHOSPHORYLATION	8723.15	8917.74	8789.85	8796.87	7961.6	8992.36	8954.99	8474.32	8656.46	8114.84	8816.1	8084.42	8117.1	10293.2	8227.8
GO_REGULATION_OF_TRANSCRIPTION_FROM_RNA_POLYMERASE_II_PROMOTER_IN_RESPONSE_TO_OXIDATIVE_STRESS	8718.12	8628.05	8765.39	8873.63	8890.19	8603.49	8670.85	9085.55	8369.17	10008	10447.3	8340.84	8371.41	9147.74	8670.43
GO_LAMELLIPODIUM_MORPHOGENESIS	8709.63	8696.56	8702.06	8717.21	8662.26	8165.61	8208.29	9751.01	10116	8016.88	9030.07	9697.57	9730	9790.6	7570.08
GO_REGULATION_OF_HEPATOCYTE_PROLIFERATION	8708.75	9006.09	8984.46	8978.63	8732.49	8317.55	8340.88	9554.59	9273.57	8136.47	8888.01	8176.01	8141.04	8685.02	8598.13
GO_NUCLEOTIDE_SALVAGE	8707.96	8787.77	8975.8	9468.02	9250.94	8726.19	8830.69	8606.68	8878.52	6883.3	8131.03	8054.7	7809.02	8689.72	7889.64
GO_ATF6_MEDIATED_UNFOLDED_PROTEIN_RESPONSE	8707.42	8064.29	8718.83	9037.13	8696.01	7793.81	7310.03	8804.96	8777.74	10196.9	9763.06	8543.94	8212.15	9741.72	7780.61
GO_NEGATIVE_REGULATION_OF_T_HELPER_CELL_DIFFERENTIATION	8704.52	8344.88	8283	8619.69	8552.48	9142.3	8789.35	8823.53	9062.22	6634.82	7852.66	8798.43	8950.67	9115.58	8516.15
GO_NEGATIVE_REGULATION_OF_RECEPTOR_SIGNALING_PATHWAY_VIA_JAK_STAT	8703.33	8708.24	9033.15	9103.19	9017.5	7894.25	7994.16	8980.74	8698.41	8093.64	7751.88	8753.98	8993.06	8073.73	7374.46
GO_REGULATION_OF_MRNA_SPLICING_VIA_SPLICEOSOME	8701.34	8949.24	8742.86	8753.69	8699.18	8495.24	8505.35	8973.36	8703.5	8474.88	8495.19	8847.57	8683.09	8871.71	8486.77
GO_REGULATION_OF_ANDROGEN_RECEPTOR_SIGNALING_PATHWAY	8694.5	8906.89	8905.14	8758.94	8749.96	8413.15	8347.12	8616.76	8771.93	8160.67	8409.74	8433.75	8639.05	8757.38	9031.12
GO_P38MAPK_CASCADE	8687.61	8715.78	8659.43	8911.09	8958.92	8575.02	8622.25	8835.78	9045.22	7913.37	8090.57	9013.76	8983.5	7633.09	8244.65
GO_PROTEIN_TARGETING_TO_VACUOLE	8680.33	9218.13	8779.57	8835.28	8717.35	8880.34	8881.18	8431.83	8346.36	8627.57	8502.58	8643.31	8592.14	8854.89	7589.29
GO_MITOCHONDRIAL_ELECTRON_TRANSPORT_NADH_TO_UBIQUINONE	8676.27	8674.86	8454.72	9003.51	8673.67	8913.47	8576.81	9286.13	8449.12	8608.19	8677.67	9122.35	8919.24	9083.15	8170.46
GO_REGULATION_OF_MONONUCLEAR_CELL_MIGRATION	8675.45	8718.14	8247.51	8277.34	8285.16	8573.97	8848.94	9564.01	9576.49	8329.19	9065.43	9116.35	8727.94	8632.75	8216.99
GO_CHEMOKINE_BIOSYNTHETIC_PROCESS	8672.28	8847.32	8806.59	9382.42	8829.34	6654.18	6718.2	8537.96	9363.57	7107.17	8348.22	9217.21	8953.38	8350.62	7911.07
GO_POSITIVE_REGULATION_OF_PROTEIN_DEACETYLATION	8671.4	8717.74	8610.4	8976.04	8625.06	9075.39	9079.14	8925.56	8878.88	7825.63	8130.54	8406.14	8529.27	8048.4	9281.34
GO_SUPEROXIDE_ANION_GENERATION	8667.1	8948.64	8631.27	8518.34	8577.87	8786.16	8980.76	8963.84	9056.12	8619.09	8870.9	8058.8	7917.2	7744.76	8702.92
GO_MULTIVESICULAR_BODY_ORGANIZATION	8666.71	8815.82	8800.79	8645.93	8701.16	8687.48	8705.76	8761.91	8316.93	8475.3	8358.95	8410.47	8456.72	8534.31	9149.47
GO_RESPONSE_TO_HYPEROXIA	8662.83	9667.5	9632.89	9341.25	9241.66	8547.31	8463.51	8766.69	8571.09	8127.89	8677.99	8473.33	8333.69	8682.17	8647.66
GO_POSITIVE_REGULATION_OF_PHOSPHOPROTEIN_PHOSPHATASE_ACTIVITY	8659.65	8662.98	8656.31	8867.74	8608.1	8851.48	9001.63	8528.53	8871.28	7925.28	8313.65	8995.99	8502.98	8504.02	8877.83
GO_CYTOPLASMIC_TRANSLATIONAL_INITIATION	8655.87	8987.27	8970.08	8910.23	8771.4	8388.29	7950	8524.83	8253.92	8240.92	8671.68	8481.83	8640.06	9160.86	9221.6
GO_VIRAL_BUDDING_VIA_HOST_ESCRT_COMPLEX	8652.39	8854.95	8873.82	8739.64	8710.44	8533.66	8555.59	8779.86	8594.34	8550.69	8518.12	8457.37	8515.57	8753.83	9514.47
GO_POSITIVE_REGULATION_OF_CELLULAR_EXTRAVASATION	8650.18	9226.47	8844.63	9039.98	8751.78	8612.7	8789.64	8405.78	9435.6	7151.44	7108.91	8382.5	8687.67	8132.9	7970.37
GO_ESTABLISHMENT_OF_LYMPHOCYTE_POLARITY	8649.85	8399.74	8133.31	9113.51	9007.94	9738.89	9678.66	7165.71	8352.66	6613.24	7358.09	8847	8783.12	8516.58	9095.93
GO_REGULATION_OF_LAMELLIPODIUM_MORPHOGENESIS	8646.84	8601.8	8663.32	8593.62	8630.37	7518.79	7730.39	9426.72	10090.4	7664.43	8730.88	9062.71	9255.79	9628.64	6470.87
GO_ANTIGEN_PROCESSING_AND_PRESENTATION_OF_PEPTIDE_ANTIGEN	8642.72	8519.78	8434.7	8642.95	8559.17	8642.5	8469.18	8894.77	8820.92	7836.37	8775.03	8974.95	8841.46	9075.48	8137.75
GO_REGULATION_OF_CD8_POSITIVE_ALPHA_BETA_T_CELL_ACTIVATION	8632.11	7878.36	7914.31	8811.43	7980.42	8233.52	8189.13	8931.32	8766.06	7814.33	9092.03	9476.46	9408.17	8691.33	8572.89
GO_REGULATION_OF_NUCLEASE_ACTIVITY	8631.84	8663.76	8382.25	8834.55	8414.12	8914.05	8599.91	9882.27	9751.09	8454.39	8478.92	9830.56	9580.26	8113.93	7825.51
GO_POSITIVE_REGULATION_OF_OXIDATIVE_STRESS_INDUCED_CELL_DEATH	8630.56	8450.9	8448.2	8635.97	8342.03	8734.77	8625.14	9393.22	9638.37	9042.5	9715.04	8333.9	8136.73	8440.96	9549.24
GO_RNA_STABILIZATION	8629.83	8457.73	8401.46	8666.97	8450.18	8681.81	8544.81	9027.84	8590.68	8495.94	8724.97	8823.06	8839.17	8592.69	8699.41
GO_ENDOSOME_TRANSPORT_VIA_MULTIVESICULAR_BODY_SORTING_PATHWAY	8626.4	8929.45	8889.63	8737.91	8755.15	8796.18	8839.83	8514.88	8234.49	8072.29	7710.68	8362.52	8497.36	8989.17	8350.11
GO_LIVER_MORPHOGENESIS	8622.08	9342.41	9280.03	8907.6	8929.1	8547.82	8603.11	8947.7	8759.76	7893.25	8405.65	8157.59	7979.34	8538.92	8641.06
GO_CD40_SIGNALING_PATHWAY	8620.49	8290.78	8273.63	8679.98	8710.82	8771.76	8518.93	8821.31	8939.15	6067.93	7908.09	8929.73	8611.19	8629.78	8129.51
GO_POSITIVE_REGULATION_OF_LEUKOCYTE_ADHESION_TO_VASCULAR_ENDOTHELIAL_CELL	8617.24	8878.7	8634.19	9054.42	8656.23	8384.27	8600.29	7949.29	8867.36	6821.36	7984.42	8590.83	8875.28	8969.06	8581.61
GO_POSITIVE_REGULATION_OF_B_CELL_PROLIFERATION	8616.49	8651.63	8581.34	8814.33	8556.84	8772.93	8489.01	8657.79	8739.57	6423.84	7838.64	8978.08	8969.61	8471.3	7095.08
GO_VACUOLAR_ACIDIFICATION	8614.24	8524.4	8851.91	8951.84	8702.15	8221.32	8595.7	8484.14	8632.79	8384.28	8823.79	8584.23	8644.12	9175.07	6987.95
GO_CELLULAR_RESPONSE_TO_GROWTH_HORMONE_STIMULUS	8614.04	8480	8278.12	8981.55	8708.85	8971.84	9125.37	8595.08	8747.28	8015.22	8542.59	8615.18	9025.79	6978.57	8612.9
GO_ATP_SYNTHESIS_COUPLED_ELECTRON_TRANSPORT	8611.57	8504.11	8380.96	8695.47	8470.37	8836.28	8483.5	9210.61	8049.3	8718.44	8816.15	9007.4	8527.68	8936.44	8114.01
GO_NEGATIVE_REGULATION_OF_ANTIGEN_RECEPTOR_MEDIATED_SIGNALING_PATHWAY	8603.52	8617.87	8465.76	8708.94	8567.48	8844.43	8598.07	8992.18	9489.95	6908.38	7410.51	8805.67	8608.96	8455.86	7953.47
GO_AMYLOID_BETA_FORMATION	8603.5	8636.83	8576.33	8630.66	8492.4	9044.89	8959.45	8695.79	9027.85	8035.07	8945.17	8208.86	8456.72	8025.21	7484.25
GO_REGULATION_OF_MONOCYTE_DIFFERENTIATION	8602.54	7923	7751.85	8829.13	8299.32	8061.63	8484.63	8727.24	8748.45	8052.81	9467.27	9003.21	8915.74	8720.44	7883.79
GO_GLUCOSE_6_PHOSPHATE_METABOLIC_PROCESS	8600.47	8253.33	9044.25	8445.2	8331.71	9467.79	8651.43	9112.12	8549.51	7901.57	7809.4	9420.47	9291.99	8746.96	8048.71
GO_POSITIVE_REGULATION_OF_CYTOKINE_BIOSYNTHETIC_PROCESS	8598.59	8989.55	8742.66	9345.23	9018.58	8162.17	8049.06	8454.52	8819.1	6186.84	7369.51	9162.51	8979.51	8396.65	7715.07
GO_MATURE_B_CELL_DIFFERENTIATION_INVOLVED_IN_IMMUNE_RESPONSE	8598.42	8905.09	8558.51	9437.33	9000.98	8858.38	8613.4	8583.44	8494.43	5879.78	7704.79	9343.27	8674.85	7899.67	6648.16
GO_POSITIVE_REGULATION_OF_AUTOPHAGY_OF_MITOCHONDRION	8596.83	8843.83	8819.25	8854.83	8848.56	8468.2	8438.25	8481.65	8230.02	8405.65	8358.06	8740.7	8712	8448.25	8860.78
GO_ENDOPLASMIC_RETICULUM_CALCIUM_ION_HOMEOSTASIS	8594.3	8348.9	8738.28	8423.96	8635.47	8235.53	8207.7	8607.09	8786.87	8270.95	8581.51	8932.36	8899.57	8644.22	7357.09
GO_PATTERN_RECOGNITION_RECEPTOR_SIGNALING_PATHWAY	8593.45	8825.07	8635.17	8834.03	8805.59	8722.59	8623.4	8595.92	8590.97	8073.61	8267.13	8526.19	8516.51	8239.94	8119.73
GO_POSITIVE_REGULATION_OF_TRANSCRIPTION_ELONGATION_FROM_RNA_POLYMERASE_II_PROMOTER	8591.93	8568.43	8615.43	8760.3	8560.65	8879.76	8691.59	8496.56	8692.29	7638.93	7211.9	8721.93	9014.65	8196.4	8500.6
GO_LATE_ENDOSOME_TO_VACUOLE_TRANSPORT	8590.94	8926.07	8901.41	9022.42	8938.14	8778.9	8839.06	8430.85	8451.04	7910.53	8050.56	8463.36	8505.75	8676.13	8136.29
GO_REGULATION_OF_CYTOPLASMIC_MRNA_PROCESSING_BODY_ASSEMBLY	8589.88	8789.43	8576.74	8941.44	8984.1	8603.01	8309.58	8432.47	8386.86	7960.31	7526.31	8856.52	8720.47	8700.4	4773.7
GO_POSITIVE_REGULATION_OF_SUBSTRATE_ADHESION_DEPENDENT_CELL_SPREADING	8589.84	8878.55	8948.77	8525.98	8334.23	8653.7	8982.08	8376.49	8437.07	8367.96	8660.41	7602.28	7853.13	8923.45	8942.93
GO_REGULATION_OF_ANTIGEN_PROCESSING_AND_PRESENTATION	8586.37	8567.13	8419.21	9567.63	9230.58	8605.6	8549.98	8358.64	9153.82	6603.83	8437.37	9807.05	9899.14	8906.58	8218.69
GO_NEGATIVE_REGULATION_OF_INTERLEUKIN_1_PRODUCTION	8586.08	8643.36	8517.1	8901.15	8835.42	8594.2	8790.03	8026.05	8303.43	7333.73	8725.6	8577.96	8899.88	7021.84	7687.04
GO_POSITIVE_REGULATION_OF_INTERFERON_BETA_PRODUCTION	8584.92	8429.44	8310.9	8663.44	8512.06	8622.57	8248.86	9105.6	8547.27	8744.72	8955.55	9106.6	9130.5	7909.6	7627.8
GO_REGULATION_OF_TUMOR_NECROSIS_FACTOR_MEDIATED_SIGNALING_PATHWAY	8584.26	8688.53	8686.1	8903.95	8740.45	8551.83	8402.13	8537.84	8519.1	8175.02	8522.52	8616.68	8657.65	8326.68	8803.9
GO_MYELOID_LEUKOCYTE_CYTOKINE_PRODUCTION	8572.25	9036.56	8596.48	9046.35	9279.92	7907.08	8015.08	8548.02	8662.44	7529.87	7559.85	8544.42	8697.2	8843.79	7578.13
GO_NEGATIVE_REGULATION_OF_PROTEIN_LOCALIZATION_TO_MEMBRANE	8570.2	8378.72	8022.27	8528.75	8324.23	8788.22	8886.44	8459.3	8611.66	9015.51	8786.12	8049.09	8290.77	8875.83	9946.16
GO_POSITIVE_REGULATION_OF_INFLAMMATORY_RESPONSE_TO_ANTIGENIC_STIMULUS	8567.39	8654.51	8212.9	9613.04	9447.59	8251.55	7887.95	9647.18	9417.7	6085.48	7790.93	8480.27	8775.52	9267.63	7824.63
GO_LEUKOCYTE_ACTIVATION_INVOLVED_IN_INFLAMMATORY_RESPONSE	8565.43	8561.16	8569.71	9000.02	8828.29	8510.15	8430.81	8730.02	8767.71	7353.35	8430.06	9019.66	8748.74	8140.12	7627.88
GO_REGULATION_OF_B_CELL_PROLIFERATION	8563.64	8606.82	8520.45	8615.71	8360.85	8630.35	8369.78	8733.74	8795.82	6381.4	7414.84	8788.74	8802.48	8190.92	7501.68
GO_B_CELL_HOMEOSTASIS	8558.69	8950.62	8814.3	8631.02	8681.19	8512.61	8505.13	8697.75	8360.05	6802.53	7609.87	8779.86	8391.72	8604.77	7817.43
GO_NEGATIVE_REGULATION_OF_MRNA_METABOLIC_PROCESS	8553.86	8506.4	8303.94	8532	8252.55	8568.19	8413.71	9172.24	8832.66	8480.47	8539.53	8811.74	8874.79	8664.06	8906.95
GO_POSITIVE_REGULATION_OF_MYELOID_LEUKOCYTE_CYTOKINE_PRODUCTION_INVOLVED_IN_IMMUNE_RESPONSE	8553.05	8897.68	8864.3	9027.22	9182.56	7793.11	7803.02	8251.32	8375.76	7545.28	7903.91	9053.22	9008.27	8730.33	7549.45
GO_REGULATION_OF_GRANULOCYTE_CHEMOTAXIS	8550.94	8719.11	8351.32	8529.39	8659.25	8448.24	8899.31	8730.04	8693.51	7532.85	7906.01	8015.7	7485.57	8572.49	8859.01
GO_POSITIVE_REGULATION_OF_ERAD_PATHWAY	8549.94	8698.04	8877.83	8910.37	8736.73	8461.24	8466.62	7810.88	8357.4	8623.34	8828.9	8476.55	8431.59	9282.22	8336.68
GO_NEGATIVE_REGULATION_OF_ANOIKIS	8547.79	8797.12	8881.1	8228.34	7242.92	7875.84	7962.91	9730.14	8950.95	8867.79	9021.35	8298.45	7945.78	9589.83	8221.36
GO_MRNA_SPLICE_SITE_SELECTION	8537.8	8618.81	8888.21	8608.8	8569.79	8719.52	8738.11	8505.81	8732.31	7516.86	7267.41	8395.44	8339.76	8413.21	7779.03
GO_NEGATIVE_REGULATION_OF_RESPONSE_TO_ENDOPLASMIC_RETICULUM_STRESS	8535.43	8520.89	8571.31	8703.71	8549.98	8145.01	7902.51	8618.1	8406.38	8960.17	8963.28	8349.2	8148.04	8660.56	8510.01
GO_REGULATION_OF_TRANSLATIONAL_INITIATION_BY_EIF2_ALPHA_PHOSPHORYLATION	8532.48	8817.67	8612.58	8938.04	8618.9	7132.44	6627.92	7852.46	7540.09	9079.14	8870.39	7698.06	7438.46	8811.13	8452.38
GO_REGULATION_OF_RNA_SPLICING	8531.34	8673.56	8520.62	8588.24	8557.96	8280.25	8285.59	8970.41	8680.66	8542.05	8446.07	8470.28	8362.94	8700.26	8408.92
GO_POSITIVE_REGULATION_OF_LAMELLIPODIUM_ORGANIZATION	8530.34	8332.06	8566.63	8696.7	8643.52	8486.63	8479.39	8759.12	8576.73	7872.31	8416.13	8766.48	8452.32	8911.22	8494.04
GO_REGULATION_OF_INTRINSIC_APOPTOTIC_SIGNALING_PATHWAY	8529.26	8547.52	8624.59	8648.58	8426.26	8289.5	8175.02	8827.99	8511.01	8897.05	9007.31	8360.28	8269.29	8873.45	8485.13
GO_NEGATIVE_REGULATION_OF_VIRAL_GENOME_REPLICATION	8527.86	8204.25	8005.1	8488.81	8181.53	8364.47	8566.9	9912.36	9722.17	8626.81	8658.63	10160	9970.51	7193.35	7549.56
GO_INTRACELLULAR_MRNA_LOCALIZATION	8525.06	8713.2	8707.32	8346.69	7777.34	8339.38	8925.03	9003.14	9083.42	7585.9	7978.74	8221.02	8703.44	9220.89	7991.81
GO_POSITIVE_REGULATION_OF_HORMONE_BIOSYNTHETIC_PROCESS	8521.24	8786.77	8436.48	9255.94	9073.19	8419.59	8280.63	8494.71	8607.2	9163.47	9928.21	8487.61	8210.85	8499.81	8542.68
GO_POSITIVE_REGULATION_OF_NATURAL_KILLER_CELL_ACTIVATION	8518.11	8782.31	8611.32	8746.94	8611.32	8405.01	8333.31	8886.3	8424.91	7380.4	7400.03	9335.16	9247.48	8313.96	6876.73
GO_NEGATIVE_REGULATION_OF_PROTEIN_MODIFICATION_BY_SMALL_PROTEIN_CONJUGATION_OR_REMOVAL	8517.93	8633.12	8774.42	8808.22	8590.44	8453.02	8291.48	8582.85	8427.11	8007.43	7591.03	8961.59	8685.25	8277.47	8076.04
GO_POSITIVE_REGULATION_OF_TUMOR_NECROSIS_FACTOR_SUPERFAMILY_CYTOKINE_PRODUCTION	8517.78	8832.15	8741.98	9194.42	8903.66	8593.98	8638.74	7831.28	8270.5	7317.82	7735.08	8635.14	8441.57	8102.67	7206.21
GO_POSITIVE_REGULATION_OF_NF_KAPPAB_TRANSCRIPTION_FACTOR_ACTIVITY	8517.76	8490.92	8352.28	8745.67	8571.05	8660.86	8580.92	8702.6	8544.61	8292.19	8218.88	8577.65	8444.21	8178.92	7945.76
GO_INTERLEUKIN_2_PRODUCTION	8512.46	8549.53	8393.06	8810.48	8333.26	8475.38	8317.15	9156.3	9103.31	6741.17	7530.46	8897.24	8706.53	8772.06	7347.53
GO_REGULATION_OF_DENDRITIC_CELL_DIFFERENTIATION	8511.16	7860.66	8024.43	9161.98	8880.94	8437.84	9166.6	8353.78	8904.09	6172	8203.59	9031.62	9327.45	8584.48	7654.95
GO_POSITIVE_REGULATION_OF_LAMELLIPODIUM_ASSEMBLY	8506.08	8384.02	8628.14	8916.94	8879.11	8930.74	8881.25	8381.73	8013.54	7544.34	7891.17	8152.43	7662.87	9024.87	8912.72
GO_REGULATION_OF_ENDOPLASMIC_RETICULUM_UNFOLDED_PROTEIN_RESPONSE	8502.37	8126.46	8563.27	8423.38	8099.03	7421.29	7732.45	9225.24	8753.78	9061.64	8808.69	8441.47	8075.23	8631.23	9012.38
GO_POSITIVE_REGULATION_OF_SIGNAL_TRANSDUCTION_BY_P53_CLASS_MEDIATOR	8500.07	8682.31	8493.68	8659.81	8506.45	8376.92	7782.81	9632.16	8720.5	7861.64	8385.17	9251.55	8510.79	8263.29	7916.73
GO_NEGATIVE_REGULATION_OF_B_CELL_PROLIFERATION	8488.34	8669.94	8512.14	8507.41	8353.1	8899.49	8861.54	9018	9074.17	6917.66	7039.53	8349.17	8469.27	8006.51	8377.12
GO_RESPONSE_TO_INTERLEUKIN_1	8487.67	8406.32	8559.78	8621.28	8537.39	8057.04	8009.89	8433.19	8449.65	7844.95	8525.69	8857.87	8565.39	8649.76	8150.86
GO_RESPONSE_TO_INTERFERON_BETA	8487.33	8076.46	7520.99	8528.49	8383.01	8622.18	8446.17	9677.6	9425.78	7759.21	8897.31	9833.03	9627.2	7300.83	7903.18
GO_MAINTENANCE_OF_PROTEIN_LOCATION_IN_CELL	8487.22	8154.38	8140.44	8360.98	8145.85	8278.62	8445.79	8669.73	8611.08	8559.25	8528.64	8681.73	8824.25	8648.4	8239.83
GO_VESICLE_MEDIATED_TRANSPORT_BETWEEN_ENDOSOMAL_COMPARTMENTS	8486.49	8548.13	8494.3	8580.5	8310.51	8665.09	8647.67	8476.48	8478.69	8332.73	8207.58	7917.66	8065.76	8801.71	8940.8
GO_CLATHRIN_COAT_ASSEMBLY	8483.93	8529.14	8533.69	8953.19	8543.82	9269.34	9147.53	8039.03	8432.2	7526.01	8116.69	7740.43	7975.81	8438.72	8566.84
GO_REGULATION_OF_MRNA_PROCESSING	8482.35	8680.93	8519.86	8526	8413.46	8444.84	8385.99	8695.67	8444.19	8273.59	8169.14	8609.2	8546.44	8581.22	8180.6
GO_REGULATION_OF_ENDOTHELIAL_CELL_DEVELOPMENT	8478.84	8702.19	8630.68	8860.9	8988.36	8396.38	8410.95	7847.33	8333.28	7846.13	7916.29	9335.99	9235.54	8546.74	8012.25
GO_MEMBRANE_RAFT_ORGANIZATION	8477.77	8502.14	8384.19	8403.93	8083.38	8453.4	8743.36	10061.3	9039.98	8531.33	8255.18	7980.87	7748.03	9045.89	9089.35
GO_NEGATIVE_REGULATION_OF_B_CELL_ACTIVATION	8475.61	8733.32	8488.61	8466.18	8220.68	8485.04	8459.66	8987.95	8995.66	7029.19	7379.82	8629.91	8595.64	8346.84	8129.25
GO_POSITIVE_T_CELL_SELECTION	8475.43	8486.94	8557.09	8568.44	8463.92	8190.79	7549.31	9216.46	9169.35	2105.8	4300.28	9298.41	9218	8154.93	5760.99
GO_POSITIVE_REGULATION_OF_NITRIC_OXIDE_METABOLIC_PROCESS	8473.97	9184.1	9217.36	8483.34	8464.59	8061.64	8133.22	8875.4	8914.83	7374.51	8393.5	8826.08	8584.38	7639.15	7776.38
GO_LEUKOCYTE_MIGRATION_INVOLVED_IN_INFLAMMATORY_RESPONSE	8473.26	8746.78	8093.34	8501.91	8135.29	8444.61	8593.24	8755.68	9525.8	8930.77	8625.48	7798.58	7324.97	7608.6	7454.22
GO_POSITIVE_REGULATION_OF_MYELOID_LEUKOCYTE_DIFFERENTIATION	8473.22	8470.03	8322.58	8879.12	8476.42	8239.82	8287.94	8720.3	8780.82	7588.73	8231.95	8759.19	8596.01	8781.52	7635.12
GO_CYTOPLASMIC_MRNA_PROCESSING_BODY_ASSEMBLY	8472.29	8768.27	8343.1	8734.34	8604.73	8456.97	8262.99	8487.61	8072.26	8103.72	8235.36	8968.59	8683.64	8602.08	6477.73
GO_CARBOHYDRATE_PHOSPHORYLATION	8471.74	8292.52	8473.3	8470.18	8143.61	8856.52	8673.78	8203.9	9032.94	7394.5	8281.99	8083.28	8732.09	8685.4	8559.53
GO_REGULATION_OF_DEFENSE_RESPONSE_TO_VIRUS_BY_HOST	8470.3	8654.88	8447.84	8398.17	8346.88	8492.77	8562.32	9045.36	8881.84	8011.03	8148.66	9301.16	8969.47	7724.37	7641
GO_POSITIVE_REGULATION_OF_DEFENSE_RESPONSE_TO_VIRUS_BY_HOST	8467.52	8108.57	7936.81	8424.36	8208	8530.94	8680.26	9183.98	8805.37	8069.85	8510.68	9674.81	9404.86	6707.38	7127.19
GO_REGULATION_OF_DEOXYRIBONUCLEASE_ACTIVITY	8467.19	8204.03	8129.11	8660.74	7968.85	8707.12	8542.89	9118.1	9137.34	6695.27	6649	8943.97	9083.14	7955.83	8391.49
GO_RAP_PROTEIN_SIGNAL_TRANSDUCTION	8465.54	8339.9	8175.44	8575.84	8487.55	8531.41	8176.27	7927.97	8443.53	6986.86	7620.83	9072.24	8855	8655.38	9008.19
GO_RESPONSE_TO_LITHIUM_ION	8462.3	8124.57	8607.08	8725.72	8220.45	6911.16	8089.07	8367.23	9131.86	9216.44	9921.16	8557.36	8175.89	9388.04	6215.96
GO_NEGATIVE_REGULATION_OF_LIPID_STORAGE	8459.98	8501.46	8660.39	8781.84	8628.12	7714.98	7512.18	8229.6	9044.59	6693.58	8068.73	8624.22	8418.5	9212.64	7008.41
GO_INTERLEUKIN_35_MEDIATED_SIGNALING_PATHWAY	8459.94	8640.71	8327.97	8373.55	8577.59	8546.33	8359.44	9412.17	8181.83	7525.23	8767.63	10304.3	10291.4	8243.5	5865.94
GO_PIGMENT_GRANULE_MATURATION	8458.75	8057.81	8554.14	7848.25	8357.75	8561.51	8482.37	8739.93	8076.02	8007.49	8435.12	8719.16	8609.25	8591.74	6354.28
GO_MAINTENANCE_OF_PROTEIN_LOCALIZATION_IN_ORGANELLE	8458.18	8202	8411.76	8605.8	8319.64	8447.99	8554.73	8556.2	8468.37	8177.08	8083.39	8623.17	8676.83	8679.57	8102.97
GO_POSITIVE_REGULATION_OF_MAST_CELL_ACTIVATION_INVOLVED_IN_IMMUNE_RESPONSE	8455.54	8415.32	8416.69	8955.66	8548.24	8344.23	8574.68	9565.03	10156.8	8281.26	8044.23	8183.55	8388.52	8891.19	8494.39
GO_NEGATIVE_REGULATION_OF_LIPOPOLYSACCHARIDE_MEDIATED_SIGNALING_PATHWAY	8454.58	8834.13	8455.73	8941.83	8881.14	8531.16	8583.9	8195.95	8057.21	7522.73	7905.73	8453.43	8323.83	7297.88	9141.23
GO_REGULATION_OF_NITRIC_OXIDE_BIOSYNTHETIC_PROCESS	8454.45	9054.76	9038.13	8699.07	8548.62	8148.71	8173.79	8625.44	8507.42	7460.88	8359.54	8656.33	8401.48	8041.88	7863.77
GO_TYPE_I_INTERFERON_PRODUCTION	8449.38	8428.8	8258.3	8650.69	8469.97	8583.49	8330.82	8852.55	8650.06	8115.45	8096.39	8729.13	8876.5	8137.77	7958.52
GO_ENDOPLASMIC_RETICULUM_TO_CYTOSOL_TRANSPORT	8445.94	8423.83	8369.81	8520.36	8373.1	8314.73	7930.34	8468.06	8133.71	8528.73	9080.01	8558.09	8684.31	8958.87	8054.11
GO_SEQUESTERING_OF_TRIGLYCERIDE	8442.92	8613.17	8832.2	9056.03	8693.4	8198.48	8059.48	6983.52	7804.66	8825.82	8272.66	7440.16	7365.49	9221.91	8766.06
GO_MAINTENANCE_OF_LOCATION_IN_CELL	8442.23	8102.76	8194.65	8233.96	8170.54	8454.83	8535.26	8711.67	8543.29	8429.63	8244.44	8647.9	8742.58	8548.82	8191.96
GO_BARBED_END_ACTIN_FILAMENT_CAPPING	8439.97	8531.01	8585.23	8167.59	8307.01	8262.45	8577.7	8348.93	8186.45	7198.57	7814.81	9180.22	8559.53	8789.46	8714.88
GO_REGULATION_OF_MRNA_METABOLIC_PROCESS	8439.49	8506.85	8401.59	8437.26	8333.9	8441.72	8336.51	8994.22	8625.47	8354.99	8364.8	8797.55	8688.99	8593.77	8230.16
GO_POSTSYNAPTIC_CYTOSKELETON_ORGANIZATION	8435.5	8363.87	8065.63	7974.72	7858.43	8392.17	8478.83	9347.15	9471.14	9844.48	8960.31	7309.91	7350.9	8518.18	10555.4
GO_MIRNA_METABOLIC_PROCESS	8434.79	8573.51	8309.06	8196.03	8351.87	8927.62	8602.85	8624.85	8323.9	8599.12	8350.39	8798.52	8517.71	8225.25	7247.23
GO_NEGATIVE_REGULATION_OF_NITRIC_OXIDE_METABOLIC_PROCESS	8434.7	8781.7	9069.59	9251.12	8555.71	8113.48	7983.92	8435.5	8360.42	8006.3	8641.33	8433.89	8194.48	9408	8246.07
GO_REGULATION_OF_SUBSTRATE_ADHESION_DEPENDENT_CELL_SPREADING	8434.65	8694.25	8767.08	8403.82	8142.42	8033.73	8434.59	8542.33	8536.46	8288.14	8434.7	7553.32	7595.4	8711.4	8552.89
GO_INTRINSIC_APOPTOTIC_SIGNALING_PATHWAY_IN_RESPONSE_TO_OXIDATIVE_STRESS	8433.11	8375.56	8448.63	8476.83	8284.65	8689.94	8359.04	8666.9	8230.04	8067.95	8453.13	8417.59	8150.82	8542.29	8734.26
GO_NEGATIVE_REGULATION_OF_INTERLEUKIN_2_PRODUCTION	8424.72	8521.09	8635.46	8308.42	7988.45	8328.35	8068.46	9657.92	9481	6129.25	7820.19	9265.08	9078.6	9149.84	7297.71
GO_NEGATIVE_REGULATION_OF_ENDOPLASMIC_RETICULUM_STRESS_INDUCED_INTRINSIC_APOPTOTIC_SIGNALING_PATHWAY	8424.34	8157.94	8434.11	8435.89	8084.03	8019.56	7821.81	8543.4	8414.56	8770.79	8791.13	8108.35	7603.29	8929.79	9394.11
GO_MEMBRANE_PROTEIN_INTRACELLULAR_DOMAIN_PROTEOLYSIS	8422.59	8472.49	8479.19	8610.54	8256.22	8354.31	7899.12	8372.7	8558.98	7980.19	8324.21	9086.79	8993.52	8765.83	7002.67
GO_PROTEIN_NEDDYLATION	8421.16	8457.16	8244.17	7943.21	8527.32	8688.3	8118.24	8526.6	7853.17	8385.17	8693	8513.85	7913.38	8532.84	7236.41
GO_VIRAL_BUDDING	8420.2	8570.64	8712.02	8432	8408.4	8319.8	8319.21	8710.12	8193.87	8362.52	8381.16	8455.56	8461.8	8401.25	8623.07
GO_POSITIVE_REGULATION_OF_EXTRINSIC_APOPTOTIC_SIGNALING_PATHWAY	8419.38	8073.35	8392.8	8391.23	8135.75	8092.25	8108.04	8733.04	8582.11	8334.16	8472.04	8641.51	8445.96	8745.25	8787.75
GO_REGULATION_OF_PROTEIN_SUMOYLATION	8418.57	7950.69	8452.18	8384.95	8647.69	8580.06	8329.49	8766.19	8900.07	8302.51	7651.99	8864.53	8862.74	7699.51	8272.37
GO_REGULATION_OF_CELLULAR_AMINO_ACID_METABOLIC_PROCESS	8416.55	8126.45	8243.44	8204.47	8016.57	8203.08	8003.87	9042.27	8448.03	8385.07	9012.42	8701.81	8615.07	9088.69	8731.75
GO_PROGRAMMED_NECROTIC_CELL_DEATH	8408.99	8024.55	8057.73	8625.34	8432.98	8495.88	8385	9038.33	8653.79	7796.23	7585.38	8823.62	8719.22	7287.9	7660.52
GO_NEUTROPHIL_EXTRAVASATION	8408.06	10077.7	9729	9398.64	9059.28	10450.8	10444.1	8046.17	8421.58	7595.62	7700.23	7514.67	7965.87	7475.4	8394.53
GO_NEGATIVE_REGULATION_OF_INTRINSIC_APOPTOTIC_SIGNALING_PATHWAY	8407.55	8365.81	8491.58	8522.15	8240.32	8155.27	7998.65	8449.29	8258.63	8754.38	9064.67	8101.84	7925.68	8746.09	8512.03
GO_ACTIVATION_OF_INNATE_IMMUNE_RESPONSE	8406.43	8669.66	8437.22	8501.92	8430.06	8490.99	8382.8	8722.42	8577.25	7868.98	8071.83	8365.13	8306.56	8279.39	8072.03
GO_REGULATION_OF_MICROGLIAL_CELL_ACTIVATION	8402.27	8408.72	8187.51	8655.79	8523.48	8120.68	8190.99	8452.49	8758.6	6358.6	8064.79	8524.22	8395.82	8497.63	7290.81
GO_RESPONSE_TO_PROTOZOAN	8401.3	8029.73	7949.45	8379.06	8351.56	8775.59	8728.17	9071.77	8406.19	8396.4	9221.63	8693.22	8720.32	6941.19	7690.09
GO_RESPONSE_TO_TESTOSTERONE	8398.49	8525.4	8452.64	7982.27	8063.39	8296.04	8344.35	8587.02	8692.34	7443.85	8233.53	8537.09	8556.79	8300.63	8872.07
GO_ESTABLISHMENT_OF_PROTEIN_LOCALIZATION_TO_MEMBRANE	8394.68	8315.9	8351.26	8318.9	8128.18	8053.1	7749.43	9081.53	8438.1	8624.87	8885.25	8474.3	8250.05	8808.5	8994.93
GO_COPII_COATED_VESICLE_CARGO_LOADING	8392.42	8783.06	8443.06	8987.67	9048.02	8225.86	8059.04	8341.79	8128.78	7586.5	7856.39	8849.25	8716.75	8922.12	8276.56
GO_ANTIGEN_PROCESSING_AND_PRESENTATION	8391.7	8312.19	8186.9	8580.78	8477.57	8335.44	8132.34	8417.77	8430.71	7275.55	8365.63	8786.98	8629.5	8914.9	7791.38
GO_POSITIVE_REGULATION_OF_INTERFERON_ALPHA_PRODUCTION	8388.88	8455.82	8271.61	8854.33	8794.82	8458.83	8343.4	8776.99	8434.35	7265.78	7652.28	8602.94	8319.84	7985.79	7545.68
GO_ER_OVERLOAD_RESPONSE	8385.16	8195.29	8513.54	8547.33	8300	7347.56	6694.58	8446.71	8421.59	9281.28	9038.83	8348.73	7924.69	8935.43	7909.65
GO_REGULATION_OF_MITOTIC_SPINDLE_ASSEMBLY	8384.09	8680.91	8681.55	8585.57	8425.87	8504.04	8320.93	8709.96	8337.66	8098.98	7860.16	8227.79	8136.68	8516.17	8342.31
GO_POSITIVE_REGULATION_OF_ACUTE_INFLAMMATORY_RESPONSE	8382.68	8528.73	8444.35	8946.66	8756.03	7490.65	7667.41	8953.44	8762.8	7578.65	8321.01	7464.69	7601.52	7915.9	8890.29
GO_REGULATION_OF_MRNA_CATABOLIC_PROCESS	8378.26	8274.46	8173.85	8280.1	8139.09	8363.16	8205	9110.73	8648.66	8393.36	8419.32	8797.4	8690.56	8548.69	8254.92
GO_REGULATION_OF_TRANSLATIONAL_INITIATION	8372.37	8632.68	8529.17	8647.7	8369.93	8153.43	7878.71	8472.04	8223.73	8250.86	8374.81	8422.42	8266.65	8538.37	8341.91
GO_LYSOSOMAL_TRANSPORT	8368.46	8616.4	8462.53	8681.35	8554.5	8816.33	8751.27	8166.45	8245.57	8059.29	8212.5	8195.06	8204.82	8639.01	8274.39
GO_FAT_SOLUBLE_VITAMIN_BIOSYNTHETIC_PROCESS	8365.13	9076.91	9236.12	8394.16	8164.43	7638.46	7173.47	9121.86	9567.63	5382.13	7543.66	9459.88	9031.67	8336.09	5458.79
GO_NEGATIVE_REGULATION_OF_TYPE_I_INTERFERON_PRODUCTION	8363.17	8312.39	8210.32	8653.02	8413.96	8468.52	7972.1	8988.41	8864.26	7363.18	7601.71	9149.38	9424.54	7507.96	7099.3
GO_PHAGOSOME_ACIDIFICATION	8359.12	8624.98	8810.37	8349.43	8689.24	8161.63	8368.82	8234.05	8418.52	8083.05	8563.52	8055.91	7978.82	9398.08	7187.85
GO_RIBOSOMAL_SMALL_SUBUNIT_ASSEMBLY	8354.92	8682.71	8598.88	8161.99	8037.2	8161.19	7733.63	8520.25	8378.5	7097.23	8565.01	8331.34	7955.68	8873.43	9622.59
GO_POSITIVE_REGULATION_OF_TUMOR_NECROSIS_FACTOR_MEDIATED_SIGNALING_PATHWAY	8352.86	8482.54	8261.87	8828.36	8569.39	8443.85	7983.78	7987.15	8212.42	8882.12	9336.52	8201.48	7984.76	8030.86	9471.86
GO_VIRAL_GENOME_REPLICATION	8352.74	8200.51	7913.97	8403.79	8189.91	8427.56	8393.68	9397.95	9141.15	8268.53	8311.8	9496.08	9317.64	7834.2	7435.99
GO_POSITIVE_REGULATION_OF_REACTIVE_OXYGEN_SPECIES_METABOLIC_PROCESS	8350.97	8601.59	8365.52	8429.71	8368.16	8362.79	8329.64	8780.41	8861.94	7940.71	8339.15	8134.47	7998.74	7716.99	8288.26
GO_POSITIVE_REGULATION_OF_TYPE_2_IMMUNE_RESPONSE	8350.28	7881.48	7859.79	8560.84	8513.64	7121.91	6980.06	8933.62	8423.36	7021.8	8448.92	9327.09	9161.67	8277.19	6722.25
GO_CERAMIDE_CATABOLIC_PROCESS	8349.45	8831.86	9116.28	8894.73	8708.62	8107.97	8048.28	8374.85	8117.15	8285.04	8937.99	8324.05	7808.14	8493.4	7329.52
GO_ENDOSOME_TO_LYSOSOME_TRANSPORT	8349.22	8346.33	8352.1	8468.08	8356.99	8500.4	8515.5	8053.74	8209.95	7824.92	8155.62	7821.25	7956.05	8572.32	8465.26
GO_POSITIVE_REGULATION_OF_PROTEIN_TARGETING_TO_MITOCHONDRION	8347.49	8132.23	8335.81	8189.19	8074.33	8729.94	8701.39	8573.75	8199.92	7686.12	7295.77	8541.5	8359.17	8496.66	8575.72
GO_REGULATION_OF_CD4_POSITIVE_ALPHA_BETA_T_CELL_DIFFERENTIATION	8344.5	8383.46	8305.55	8795.19	8621.13	8269.81	8220.12	8747.98	9168.03	6660.63	8008.64	9507.9	9408.47	8293.41	7372.14
GO_REGULATION_OF_INCLUSION_BODY_ASSEMBLY	8342.15	8357.92	8148.8	8801.55	8773.56	8199.1	7656.15	8787.15	8326.5	9268.21	8560.4	7748.51	7115.97	7698.11	8357.81
GO_TYPE_I_INTERFERON_SECRETION	8341.7	8765.56	8673.64	8736.86	8658.55	8733.14	8904.59	7973.84	8227.33	6012.45	5319.46	8031.21	7744.37	8456.07	7356.83
GO_REGULATION_OF_AUTOPHAGY_OF_MITOCHONDRION	8334.08	8529.33	8531.93	8455.22	8357.13	8292.03	8088.25	8311.02	8161.54	8012.4	8106.55	8412.04	8468.55	8420.86	7794.97
GO_MITOCHONDRIAL_ELECTRON_TRANSPORT_UBIQUINOL_TO_CYTOCHROME_C	8333.91	8080.78	8432.14	8642.45	8479.22	8466.65	8216.75	8878.7	8189.69	8374.03	8293.79	8245.39	8026.49	8673.62	8181.42
GO_POSITIVE_REGULATION_OF_RESPONSE_TO_ENDOPLASMIC_RETICULUM_STRESS	8332.33	8306.19	8422.96	8358.46	8073.43	7732.66	7957.1	8615.8	8206.38	8867.75	8767.19	8188.53	8129.77	8591.4	8511.01
GO_INTERLEUKIN_2_BIOSYNTHETIC_PROCESS	8323.35	8322.38	7993.48	9078.77	8025.53	8567.69	8233.32	9128.95	9399.6	4770.18	5840.32	8740.18	8324.31	8765.51	6326.09
GO_DECIDUALIZATION	8321.72	8560.68	8590.63	8643.9	8440.5	8063.97	8204.84	9349.28	9370.77	7509.17	7957.31	7734.51	7687.16	7812.8	8438.6
GO_DE_NOVO_PROTEIN_FOLDING	8320.03	8258.63	8381.43	8595.24	8516.83	7731.12	7274.91	8840.84	8069.54	8661.35	8390.95	8688.61	8150.98	7939.16	7616.16
GO_CHAPERONE_MEDIATED_PROTEIN_FOLDING	8318.99	8435.14	8370.75	8535.91	8566.33	7954.16	7594.71	8652.89	8111.12	8469.74	8267.24	8663.72	8218.49	8100.26	7195.61
GO_POSITIVE_REGULATION_OF_ALPHA_BETA_T_CELL_PROLIFERATION	8315.96	8043.4	7519.99	8993.32	8760.65	8155.23	8207.74	8801.67	8626.26	3585.35	5791.77	8841.67	8712.84	8424.19	7201.86
GO_ALTERNATIVE_MRNA_SPLICING_VIA_SPLICEOSOME	8315.93	8440.51	8248.11	8354.59	8316.27	8086.38	8090.76	8831.34	8392.31	8199.92	8315.58	8418.35	8261.36	8495.16	8133.31
GO_T_HELPER_17_CELL_LINEAGE_COMMITMENT	8315.49	8512.58	8216.23	8414.74	8497	6735.1	6214.22	8629.17	8943.5	2188.35	4530.98	9104.97	9209.84	7945.51	4968.43
GO_POSITIVE_REGULATION_OF_VASCULAR_ENDOTHELIAL_GROWTH_FACTOR_RECEPTOR_SIGNALING_PATHWAY	8313.35	9173.55	9324.21	8824.88	8569.48	8338.38	8288.32	8039.69	7617.37	7748.42	8896.59	8062.63	8206.55	8797.07	7677.27
GO_POSITIVE_REGULATION_OF_T_HELPER_1_TYPE_IMMUNE_RESPONSE	8313.02	8314.39	7946.59	9138.11	9109.34	7977.67	8311.64	8110.55	8425.33	6719.71	7587.12	9438.24	8885.72	8540.07	7067.6
GO_HISTONE_H2B_UBIQUITINATION	8304.44	8087.33	8303.75	8306.69	7942.77	8191.37	8409.66	8876.16	8630.22	7538.59	7395.47	9324.76	9087.66	8305.13	7072.26
GO_AUTOPHAGY_OF_MITOCHONDRION	8303.75	8536.03	8523.62	8504.96	8295.99	8311.51	8145.73	8391.05	8237.35	8616.68	8390.01	7955.47	7934.69	8259.05	7845.97
GO_FRUCTOSE_6_PHOSPHATE_METABOLIC_PROCESS	8303.3	8362.46	8312.99	8293.6	7709.57	7918.54	7645.66	8751	9157.32	6718.68	8180.76	9578.49	9974.41	9559.53	8167.94
GO_PRODUCTION_OF_MOLECULAR_MEDIATOR_INVOLVED_IN_INFLAMMATORY_RESPONSE	8300.15	8150.22	8322.62	8481.17	8168.35	8717.65	8781.48	8277.68	8529.48	7599.55	7862.77	8340.95	8352.45	8118.16	7058.48
GO_RESPONSE_TO_FUNGICIDE	8300.09	7939.09	7750.13	8145.95	7785.78	8153.07	8447.11	8074.89	7803.3	9365.52	9298.68	8629.65	8623.51	8720.95	8628.48
GO_PEPTIDYL_THREONINE_DEPHOSPHORYLATION	8299.1	8460.62	8202.93	8177.89	8168.61	7926.41	7991.1	8309.35	8295.3	8885.5	8878.29	8628.44	8407.73	8302.9	8158.69
GO_PROTEIN_LOCALIZATION_TO_ENDOSOME	8297.57	8274.42	8062.38	8169.35	7960.56	8426.61	8407.43	8590.25	8320.72	8978.92	8494.05	7833.89	7984.62	8690.74	8241.46
GO_POSITIVE_REGULATION_OF_LEUKOCYTE_DIFFERENTIATION	8293.12	8236.87	8123.99	8550.66	8349.36	8089.09	8038.84	8504.79	8571.74	6698.87	7509.82	8678.11	8626.17	8391.97	7390.09
GO_TRANSFERRIN_TRANSPORT	8290.62	8489.06	8428.82	8327.37	8471.62	8229.41	8253.86	7874.23	8070.4	8060.08	8589.43	7600.84	7615.01	8931.06	8548.26
GO_NEGATIVE_REGULATION_OF_ALPHA_BETA_T_CELL_DIFFERENTIATION	8289.93	7707.66	7605.79	8163.11	7898.57	8537.64	8373.01	8741.5	8884.01	7095.97	8034.48	8745.29	8895.94	8369.28	8210.59
GO_NEGATIVE_REGULATION_OF_NUCLEOTIDE_METABOLIC_PROCESS	8289.03	7996.85	8307.73	8781.16	8454.1	8472.97	8211.18	7643.21	8270.33	8577.17	8009.36	6893.62	7474.84	8587.87	8401.24
GO_POSITIVE_REGULATION_OF_PHAGOCYTOSIS	8288.17	8193.03	7863.44	8777.69	8295.35	8409.86	8548.01	8758.02	9054.8	6920.62	7812.38	8280.98	8431.8	7931.39	7150.34
GO_PINOCYTOSIS	8284.81	8090.07	8191.51	8126.09	7676.28	8190.7	8210.82	9387.83	9248.97	8844.6	7696.21	8630.62	9015.05	8615.38	8358.8
GO_POSITIVE_REGULATION_OF_INTERLEUKIN_8_PRODUCTION	8281	8563.74	8271.92	8822.79	8734.52	8307.67	8306.68	7928.91	8240.59	7262.16	7367.24	8290.08	8328.14	7830.11	8050.26
GO_REGULATION_OF_ATP_BIOSYNTHETIC_PROCESS	8279.8	8616.01	8475.99	8630.48	8282.22	8315.13	8277.38	8314.5	7613.41	7335.07	8194.12	7892.62	7264.97	9260.26	8221.31
GO_POSITIVE_REGULATION_OF_RECEPTOR_RECYCLING	8278.35	8433.92	8239.82	8354.86	8526.25	7808.27	7764.19	9117.05	8781.94	7172.84	6541.6	8223.96	8104.37	8316.89	8835.24
GO_MRNA_METABOLIC_PROCESS	8275.48	8368.9	8257.1	8279.76	8164.01	8247.21	7891.9	8669.21	8330.14	8264.47	8326.25	8417.44	8271.21	8598.33	8267.88
GO_POSITIVE_REGULATION_OF_CD4_POSITIVE_ALPHA_BETA_T_CELL_DIFFERENTIATION	8274.27	8137.34	8142.58	8899.98	8740.03	7935.9	7977.68	8405.95	8965.75	6556.08	8085.8	9333.25	9110.41	8455.33	7577.06
GO_EMBRYO_IMPLANTATION	8273.77	8471.87	8257.95	8644.37	8539.24	7990.45	7808.94	8576.92	8445.52	7772.4	8289.6	8156.85	7836.62	8585.66	7835.88
GO_POSITIVE_REGULATION_OF_DNA_TEMPLATED_TRANSCRIPTION_ELONGATION	8272.91	8256.94	8067.7	8375.71	8312.66	8288.87	8186.4	8370.96	8216.45	7611.96	7150.16	8584.77	8618.97	8210.78	8324.84
GO_NEGATIVE_REGULATION_OF_CYSTEINE_TYPE_ENDOPEPTIDASE_ACTIVITY	8270.04	8319.84	8441.25	8625.78	8517.92	8185.07	8189.37	8650.93	8569.08	8220.24	7963.76	8186.95	8011.69	8530.16	8090.58
GO_NEGATIVE_REGULATION_OF_TYROSINE_PHOSPHORYLATION_OF_STAT_PROTEIN	8269.15	8263.47	8601.66	8508.85	8168.74	7529.47	7654.85	8958.86	8274.82	7732.14	8115.02	9293.41	9059.54	8432.69	6694.25
GO_PYRIMIDINE_CONTAINING_COMPOUND_SALVAGE	8266.46	6887.8	7257.91	7617.6	6911.36	9148.29	9248.93	8849.15	9308.55	8260.29	8793.56	8575.43	8272.63	8044.86	5747.29
GO_OSTEOCLAST_DIFFERENTIATION	8262.26	8308.13	8163.49	8438.01	8216.38	8034.33	8003.29	8822.64	8722.33	7079.89	7884.83	8489.04	8403.62	8364.46	7745.99
GO_POSITIVE_REGULATION_OF_ALPHA_BETA_T_CELL_DIFFERENTIATION	8261.73	8130.02	8096.82	8683.85	8522.74	8090.82	8178.24	8345.23	8851.47	6359.3	7689.25	9103.14	8990.97	8408.63	7650.38
GO_INTERLEUKIN_12_PRODUCTION	8260.73	8246.17	8130.5	8686.68	8499.02	8331.84	8275.29	8115.51	8564.45	6392.88	7275.02	8945.96	8810.75	7490.71	6865.57
GO_INTERLEUKIN_10_SECRETION	8259.88	7375.71	7201.68	8184.82	7542.42	9212.34	9226.29	10192.6	9662.38	9068.61	9752.86	8334.93	8035.63	6540.29	8020.17
GO_MORPHOGENESIS_OF_AN_ENDOTHELIUM	8259.22	7797.97	7972.45	8190.31	7812.66	8366.03	8427.07	8866.08	8475.92	8756.03	7955.36	8358.98	8236.98	8281.47	7695.36
GO_NEGATIVE_REGULATION_OF_OXIDATIVE_STRESS_INDUCED_NEURON_DEATH	8257	8626.08	8739.01	8565.15	8486.09	7151.04	7154.32	8267.87	8167.16	7622.27	7945.35	8724.16	8246.13	9119.09	7836.05
GO_SMAD_PROTEIN_COMPLEX_ASSEMBLY	8256.65	7460.47	7605.18	7916.12	7401.39	8128.06	7666.89	8643.06	8921.38	7645.25	8945.44	9138.13	9441.62	8629.99	8385.24
GO_REGULATION_OF_HISTONE_UBIQUITINATION	8255.5	7985.44	8333.02	8524.65	8250.76	8404.83	8403.65	8121	8260.23	7643.27	7661.11	8418.74	8455.75	8040.47	7347.34
GO_POSITIVE_REGULATION_OF_LEUKOCYTE_CHEMOTAXIS	8255.26	8314.05	8002.98	8371.46	8322.62	7955.36	7987.58	8676.98	8403.22	7215.06	8025.99	8674.81	8327.12	8196.47	7653.14
GO_INTRINSIC_APOPTOTIC_SIGNALING_PATHWAY	8251.17	8221.59	8334.35	8280.76	8071.01	7932.55	7886.02	8667.68	8425.97	8393.65	8368.27	8169.81	8059.74	8328.2	8155.27
GO_INTERLEUKIN_1_SECRETION	8250.36	8812.34	8939.22	9072.39	8951.35	8073.82	8375.24	7808.56	8125.48	7147.1	7714.65	8754.62	8692.23	7554.76	7571.24
GO_T_CELL_LINEAGE_COMMITMENT	8247.7	8292.32	8203.08	8092.39	8327.82	7373.76	6728.22	8583.59	8573.32	4193.21	5643.78	8550.02	8549.29	8305.95	6255.27
GO_VACUOLAR_TRANSPORT	8246.08	8430.67	8279.83	8429.33	8345.42	8470.4	8523.16	8031.84	8212.33	7903.39	8027.48	8013.39	8090.04	8424.75	8065.88
GO_POSITIVE_REGULATION_OF_CYSTEINE_TYPE_ENDOPEPTIDASE_ACTIVITY_INVOLVED_IN_APOPTOTIC_SIGNALING_PATHWAY	8245.51	7639.96	8149.3	8227.77	8296.81	8164.3	8263.25	8280.51	9311.1	6298.75	7515.37	8587.95	8378.12	8593.35	7811.54
GO_NEGATIVE_REGULATION_OF_POSTTRANSCRIPTIONAL_GENE_SILENCING	8244.8	8162.84	8280.19	8365.93	8481.61	8331.39	8487.87	7551.31	7654.88	7048.25	7998.75	8791.97	8518.17	8209.42	8179.79
GO_MAINTENANCE_OF_PROTEIN_LOCATION_IN_NUCLEUS	8244.5	8096.43	8496.2	8265.42	8127.09	8298.04	8588.51	8537.33	8223.57	7952.95	7795.6	8502.47	8441.35	7940.92	6835.57
GO_POSITIVE_REGULATION_OF_TRIGLYCERIDE_BIOSYNTHETIC_PROCESS	8242.58	8190.42	8566.18	8800.03	8294.74	8975.79	9058.55	7707.14	8442.53	7382.33	8034.51	7388.15	7934.15	8735.72	7265.04
GO_GLUCOSE_CATABOLIC_PROCESS	8235.44	8297.71	8082.87	8833.64	9003.41	8855.33	8588.16	8357.82	8124.79	7548.01	7524.86	8173.17	8516.98	7794.4	6847.43
GO_REGULATION_OF_AMYLOID_PRECURSOR_PROTEIN_CATABOLIC_PROCESS	8233.73	8158.32	8210.02	8306.65	8257.44	9028.28	8731.49	8350.52	8536.8	7482.19	8499.08	7787.52	8176.07	7825.82	7476.78
GO_REGULATION_OF_VIRAL_GENOME_REPLICATION	8232.88	8026	7751.2	8274.79	8022.22	8185.72	8190.97	9468.08	9104.09	8366.83	8310.47	9544.05	9316.86	7455.89	7339.97
GO_POSITIVE_REGULATION_OF_RESPONSE_TO_CYTOKINE_STIMULUS	8231.93	8858.93	8558.37	8399.98	8570.38	8276.78	8250.47	8127.99	8211.74	6905.09	7616.89	8472.2	8213.4	8190.89	7239.93
GO_REGULATION_OF_ALPHA_BETA_T_CELL_DIFFERENTIATION	8230.5	8268.33	8192.68	8583	8371.68	8121.58	8088.28	8493.78	8872.8	6135.93	7430.1	9264.35	9191.82	8104.85	7304.74
GO_POSITIVE_REGULATION_OF_INTERLEUKIN_6_SECRETION	8227.1	8065.92	8096.18	8486.28	8201.43	8484.24	8537.62	8550.06	8730.04	8189.29	8252.77	7962.39	7803.91	8016.73	8463.22
GO_NUCLEOTIDE_EXCISION_REPAIR_DNA_DAMAGE_RECOGNITION	8220.85	8476.78	8384.53	8062.27	8278.11	8044.78	8166.64	8689.71	7951.36	8526.28	8011.63	8275.07	7869.46	8897.42	7435.83
GO_EXOCYTOSIS	8218.82	8312.74	8159.53	8477.96	8304.12	8580.14	8594.74	8270.35	8226.68	7986.67	8136.61	7800.57	7713	8210.96	8129.65
GO_POSITIVE_REGULATION_OF_LYMPHOCYTE_MIGRATION	8218.64	8581.14	8261.63	8453.81	8521.07	8175.65	8047.94	8807.69	8064.2	6900	8084.61	9153.47	8474.7	8133.5	7293.22
GO_FORMATION_OF_CYTOPLASMIC_TRANSLATION_INITIATION_COMPLEX	8212.04	8412.77	8440.29	8187.53	7979.14	7837.66	7324.79	8236.55	7903.79	7735.05	8325.94	7996.75	8274.93	9141.65	9099.05
GO_NEGATIVE_REGULATION_OF_COLD_INDUCED_THERMOGENESIS	8209.86	8373.85	8339.48	8439.17	8048.95	8642.95	8276.09	8143.63	8325.43	8413.07	8101.67	7339.2	7613.03	8084.88	7767.86
GO_NEGATIVE_REGULATION_OF_PROTEIN_OLIGOMERIZATION	8209.72	8036.53	7719.5	8014.71	7869.02	8424.25	9105.57	8593.65	8396.95	9514.71	9311.45	8068.98	8350.46	7726.93	6214.49
GO_TOLL_LIKE_RECEPTOR_9_SIGNALING_PATHWAY	8209.04	8426.2	8384.9	9125.57	9093.24	8227.12	7879.28	8190.96	8359.42	6107.24	7270	8068.48	8601.31	7399.16	6912.42
GO_REGULATION_OF_RESPONSE_TO_CYTOKINE_STIMULUS	8204.5	8405.59	8233.57	8267.89	8318.09	8146.41	8105.99	8352.22	8322.89	7286.48	7763.12	8408.06	8175.44	7861.61	7608.8
GO_NEGATIVE_REGULATION_OF_BONE_MINERALIZATION	8204.15	7995.77	8210.64	8177.86	8026.65	7870.03	8533.67	9828.78	9019.08	8197.66	8707.82	8153	7415.39	9034.72	9616.23
GO_POSITIVE_REGULATION_OF_REACTIVE_OXYGEN_SPECIES_BIOSYNTHETIC_PROCESS	8203.67	8893.4	8777.88	8154.63	8252.7	8033.9	8036.85	8800.93	8759.45	7567.25	8389.88	8328.91	7924.72	7522.28	8124.01
GO_RNA_DECAPPING	8202.18	7819.22	7670.04	8158.13	7740.16	8484.31	8401.56	9068.84	8749.96	8064.47	8246.24	9110.23	8767.3	7526.79	7211.55
GO_ZYMOGEN_INHIBITION	8202.15	7909.93	8358.36	8830	8298.55	8515.74	8809.36	8146.32	8257.98	7253.76	7228.65	7583.09	7184.25	8941.59	6749.51
GO_REGULATION_OF_T_HELPER_CELL_DIFFERENTIATION	8199.71	8117.25	8059.77	8892.31	8789.18	8071.77	8116.86	8282.18	8780.23	6889.8	8060.6	9226	9059.63	8396.13	7512.38
GO_REGULATION_OF_ERYTHROCYTE_DIFFERENTIATION	8199.47	8421.67	8192.81	8459.08	8206.13	8129.97	8019.47	8734.87	9042.9	7033.05	7766.87	8556.79	8626.79	7863.05	7477.53
GO_POSITIVE_REGULATION_OF_MACROPHAGE_MIGRATION	8198.68	8165.35	7851.13	8026.93	7924.69	7450.68	8289.93	9105.01	8636.32	7632.93	8256.51	8372.12	8493.55	8232.02	7100.62
GO_POSITIVE_REGULATION_OF_LYMPHOCYTE_DIFFERENTIATION	8198	8234.64	8130.53	8434.05	8323.49	8090.67	7921.18	8484.14	8540.32	6148.88	7176.95	8738.34	8703.97	8161.36	7237.66
GO_REGULATION_OF_RESPONSE_TO_BIOTIC_STIMULUS	8194.82	8319.02	8064.46	8177.68	8035.12	8295.35	8211.95	8561.16	8473.99	7139.72	7739.39	8358.33	8278.03	7872.53	7448.09
GO_REGULATION_OF_PROTON_TRANSPORT	8194.15	8202.16	8378.03	8735.18	8301.08	7988.32	7696.31	8714.77	9125.93	7980.71	7436.88	8186.15	7960.16	7973.52	8866.64
GO_AMYLOID_PRECURSOR_PROTEIN_CATABOLIC_PROCESS	8193.45	8191.24	8234.39	8195.65	8062.06	8858.37	8514.48	8166.51	8551.02	7845.94	8567.19	7999.35	8216.06	8080.41	7486.39
GO_INTERSPECIES_INTERACTION_BETWEEN_ORGANISMS	8193.22	8160.09	7938.78	8144.34	8021.03	8153.34	8000.15	8773.97	8335.76	8015.13	8260.39	8430.44	8226.36	8389.78	8299.52
GO_POSITIVE_REGULATION_OF_RESPONSE_TO_BIOTIC_STIMULUS	8192.5	8426.6	8132.03	8247.5	8106.27	8311.3	8175.09	8563.04	8441.91	7271.58	7738.71	8280.19	8209.92	7958.06	7613.51
GO_POSITIVE_REGULATION_OF_TRANSLATIONAL_INITIATION	8191.49	8423.69	8434.17	8640.56	8302.53	8008.5	7567.28	8276.65	8150.29	7936.65	8121.27	8232.68	7977.6	8718.52	7552.47
GO_POLYAMINE_BIOSYNTHETIC_PROCESS	8189.84	7602.91	7558.95	8434.72	8976.06	7858.29	7186.51	8355.81	8522.5	7919.63	9628.34	8618.75	7938.2	8023.88	8557.17
GO_T_CELL_DIFFERENTIATION_INVOLVED_IN_IMMUNE_RESPONSE	8187.88	8131.13	7921.54	8637.37	8600.47	8244.63	8027.37	8830.98	8912.03	6369.37	7118.03	8953.74	8680.98	8019.17	7228.77
GO_INTERLEUKIN_1_PRODUCTION	8187.26	8493.65	8412.39	8557.8	8361.2	8082.35	8173.62	7898.61	8200.9	7048.55	7760.72	8715.04	8610.31	7332.29	7369.93
GO_POSITIVE_REGULATION_OF_ANTIGEN_RECEPTOR_MEDIATED_SIGNALING_PATHWAY	8186.31	8405.67	8168.38	8864.22	8192.34	8180.28	7509.03	9456.3	9162.49	4709.36	5474.24	8873.85	8821.84	7650.83	5591.15
GO_OXIDATIVE_PHOSPHORYLATION	8185.96	8052.92	7913.17	8242.32	7986.61	8295.6	7985.31	8976.16	7879.51	8571.81	8508.59	8631.96	8129.6	8735.39	8071.73
GO_POSITIVE_REGULATION_OF_VASCULAR_ENDOTHELIAL_GROWTH_FACTOR_PRODUCTION	8183.3	8435.47	8400.24	8596.12	8653.49	7485.51	7605.72	8086.61	8114.19	8252.41	8420.09	7660.22	7168.5	8855.19	7661.66
GO_POSITIVE_REGULATION_OF_TORC1_SIGNALING	8178.12	8950.19	8705.98	9119.42	8699.56	8490.36	8105.2	7856.62	7939.84	8251.04	7612.28	7597.44	7693.46	8487.3	7216.08
GO_RESPONSE_TO_MITOCHONDRIAL_DEPOLARISATION	8178.09	8225.89	8333.17	8160.14	8018.75	8093.96	8069.43	8088.5	8196.04	7884.22	7829.22	8307.34	8466.75	8367.6	9032.27
GO_POSITIVE_REGULATION_OF_ENDOTHELIAL_CELL_CHEMOTAXIS	8174.31	9004.12	8970.64	8014.27	7896.31	7068.18	6900.7	8206.47	8263.79	7746.41	8144.97	8203.65	8303.83	8517.33	7670.91
GO_ANTIGEN_PROCESSING_AND_PRESENTATION_OF_PEPTIDE_OR_POLYSACCHARIDE_ANTIGEN_VIA_MHC_CLASS_II	8168.72	8149.32	7978.75	8188.12	8128.67	7969.03	7770.64	8622.46	8541.1	7469	8473.26	8637.41	8405.62	8721.35	7511.31
GO_REGULATION_OF_FATTY_ACID_TRANSPORT	8168.17	8791.77	8668.35	8561.17	8522.99	7677.44	7290.7	6831.8	7578.63	7083.27	8202.08	8134.25	8475.89	8537.52	7106.44
GO_REGULATION_OF_ER_TO_GOLGI_VESICLE_MEDIATED_TRANSPORT	8165.49	8806.76	8396.67	8265.16	8335.88	8933.35	8730.6	7972.04	7084.91	8431.09	8065.82	7707.05	6845.15	7805.89	7934.51
GO_POSITIVE_REGULATION_OF_ERYTHROCYTE_DIFFERENTIATION	8163.88	8211.23	7795.88	8621.92	8200.69	7983.72	8127.08	8218.39	8785.78	6935.81	7665.51	8258.18	8439.55	7274.69	7583.39
GO_POSITIVE_REGULATION_OF_VASCULAR_ASSOCIATED_SMOOTH_MUSCLE_CELL_APOPTOTIC_PROCESS	8161.72	9478.61	10294.3	8724.51	8961.65	8808.94	8847.57	6719.53	7557.41	7280.47	7111.28	7487.77	7597.63	8064.34	8259.1
GO_POSITIVE_REGULATION_OF_VIRAL_PROCESS	8159.11	8114.1	7947.46	8098.92	8144.45	8387.99	8125.97	8667.31	8364.18	8173.77	7891.95	8284.32	8176.67	8339.62	7794.79
GO_REGULATION_OF_CYSTEINE_TYPE_ENDOPEPTIDASE_ACTIVITY_INVOLVED_IN_APOPTOTIC_SIGNALING_PATHWAY	8158.98	7793.3	8210.36	8340.81	8258.22	8052.1	8107.61	8325.5	8789.48	6971.23	7366.18	8054.75	7971.67	8681.55	8476.44
GO_POSITIVE_REGULATION_OF_MACROPHAGE_DIFFERENTIATION	8155.7	8258.36	8130	8181.39	7945.35	8101.32	8343.93	8009.19	7877.78	8333.58	8733.63	7935.61	7888.04	8195	8346.86
GO_CELLULAR_RESPONSE_TO_GLUCOSE_STARVATION	8151.98	8429.78	8337.38	8303.43	8402.88	7913.62	7577.92	8000.53	7928.12	8826.94	8531.26	7996.91	7552.68	8516.2	7672.37
GO_NEGATIVE_REGULATION_OF_CAMP_MEDIATED_SIGNALING	8150.96	8186.84	8023.3	8869.83	8313.55	9017.42	9049.4	8115.08	8072.1	8967.15	8022.21	7651.12	7524.5	7898.83	8814.28
GO_INTERLEUKIN_1_BETA_PRODUCTION	8150.75	8516.59	8343.64	8574.33	8453.69	8113.75	8155.2	7778.21	8146.3	6932.91	7786.87	8569.57	8453.81	7313.19	7530.48
GO_NEGATIVE_REGULATION_OF_INNATE_IMMUNE_RESPONSE	8149.53	8133.87	7907.26	7986.05	8165.2	8629.75	8463.52	8621.73	8486.5	6077.53	7722.45	8424.02	8568.2	7562.53	6926.58
GO_GLIAL_CELL_ACTIVATION	8149.35	8336.36	8068.17	8416.91	8473.11	8043.27	7765.28	8421.83	8244.01	7261.37	8221.67	8293.86	8077.03	7692.56	7329.67
GO_POSITIVE_REGULATION_OF_T_HELPER_CELL_DIFFERENTIATION	8148.73	7849.28	7787.98	8907.56	8689.43	7452.42	7749.94	7791.09	8532.4	7216.75	8448.18	9134.29	8847.31	8627.52	7743.53
GO_REGULATION_OF_OSTEOCLAST_DIFFERENTIATION	8146.56	8238.84	8284.87	8337.46	8094.46	7908.24	7830.22	8511.79	8584.91	6603.48	7138.14	8204.02	8198.67	7939.72	6784.68
GO_REGULATION_OF_PHAGOCYTOSIS	8146.09	8244.27	7882.34	8535.85	8339.13	8490.89	8491.08	8253.15	8446.83	6677.27	7405.25	8047.92	7993.35	7605.88	7197.05
GO_REGULATION_OF_CYTOPLASMIC_TRANSPORT	8145.01	8244.8	8165.13	8448.12	8395.01	8537.64	8545.91	7808.06	8124.9	7270.11	7538.68	7909.02	8112.35	8098.57	8248.41
GO_POSITIVE_REGULATION_BY_HOST_OF_VIRAL_PROCESS	8144.43	7805.4	7984.1	7767	7717.66	8419.96	8304.75	8382.31	8458.15	9073.75	8693.57	7680.26	7903.34	8789.28	7661.95
GO_POLYAMINE_METABOLIC_PROCESS	8143.25	7421.71	7364.28	8212.55	8704.4	7733.57	7145.62	8217.56	8392.97	7586.16	9402.97	8559.91	8073.95	7894.24	8613.87
GO_REGULATION_OF_TAU_PROTEIN_KINASE_ACTIVITY	8142.74	8609.14	8122.56	9084.6	8983.92	9027.29	8603.9	8274.74	8162.92	7494.4	7072.29	7851.17	7976.79	7162.47	7646.83
GO_NEGATIVE_REGULATION_OF_RNA_CATABOLIC_PROCESS	8141.21	7935.16	7685.89	8069.97	7920.64	8122.83	8027.16	8680.98	8279.18	8159.6	8083.86	8192.03	8191.26	8187.58	8510.37
GO_POSITIVE_REGULATION_OF_CD4_POSITIVE_ALPHA_BETA_T_CELL_ACTIVATION	8140.34	7970.16	7986.23	8771.95	8593.84	7864.5	7806.89	8294.44	8633.78	6003.17	7504.27	9197.33	8899.66	8514.92	7313.65
GO_POSITIVE_REGULATION_OF_MRNA_CATABOLIC_PROCESS	8140.24	7868.55	7916.68	8053.39	7965.43	7973.27	8231.4	8763.05	8573.12	8293.53	7979.06	8441.13	8453.97	8227.08	7513.48
GO_POSITIVE_REGULATION_OF_ALPHA_BETA_T_CELL_ACTIVATION	8139.16	7919.67	7768.42	8617.12	8396.52	8071.96	7943.89	8503.34	8564.56	5814.61	7171.94	9112.73	8964.59	8206.37	7080.81
GO_HISTONE_H3_K4_TRIMETHYLATION	8138.04	8515.5	8411.36	8566.01	8471.75	8700.03	8428.71	7756.86	7877.48	7099.2	6955.53	8203.47	8048.3	8068.48	8072.61
GO_TRANSCYTOSIS	8137.16	7851.77	7990.15	8275.06	7808.59	8207.41	8066.91	8612.7	8041.52	8979.34	9093.4	7192.89	7035.87	8429.89	8698.29
GO_PROTEIN_REFOLDING	8136.42	8385.49	8366	8258.11	8635.59	7477.82	7271.83	8572.54	8156.85	8512	7932.99	8115.99	7983.14	7880.24	8069.86
GO_REGULATION_OF_RESPONSE_TO_ENDOPLASMIC_RETICULUM_STRESS	8136.37	8010.42	8162.82	8168.2	7901.05	7599.95	7571.22	8404.48	8126.56	8661.81	8628.45	8004.44	7872.79	8388.81	8146.18
GO_GRANULOCYTE_MIGRATION	8136.31	8446.45	8278.55	8380.52	8456.5	7991.94	8331.42	8366.03	8111.78	7493.19	8139.07	8059.54	7647.15	8133.56	7618.55
GO_REGULATION_OF_MYELOID_LEUKOCYTE_DIFFERENTIATION	8136.1	8140.69	8056.62	8402.01	8131.52	7967.15	8024.18	8482.72	8582.93	6961.84	7530.28	8391.24	8367.3	8198.46	7460.16
GO_POSITIVE_REGULATION_OF_CHEMOKINE_PRODUCTION	8135.73	8033.96	7989.55	8557.54	8319.41	7651.99	7513.27	7882.22	8237.49	7265.32	8315.84	8347.17	8285.75	8307.58	7566.16
GO_TUMOR_NECROSIS_FACTOR_SUPERFAMILY_CYTOKINE_PRODUCTION	8132.28	8216.73	8131.67	8697.68	8520.32	8194.74	8140.53	7616.52	7859.13	6483.6	7309.04	8208.35	8132.89	7376.85	6782.7
GO_POSITIVE_REGULATION_OF_RECEPTOR_BIOSYNTHETIC_PROCESS	8131.61	9122.79	8926.18	7978.38	8208.04	8055.18	7743.5	8798.39	8935.93	4863.12	6939.06	9442.27	9256.88	6935.42	6549.05
GO_NEGATIVE_REGULATION_OF_LIPID_CATABOLIC_PROCESS	8131.52	8345.51	8158.16	8562.24	8232.59	7902.78	8355.24	7707.55	8461.83	8080.26	8366.56	7058.6	7742.59	7868.93	8104.88
GO_NEURON_DEATH_IN_RESPONSE_TO_OXIDATIVE_STRESS	8127.43	8211.3	8219.53	8224.75	8137.42	7446.87	7470.86	8187.62	8117.45	7761.9	8050.06	8395.79	7841.36	8665.33	7925.17
GO_AUTOPHAGOSOME_ORGANIZATION	8124.85	8275.43	8322.99	8455.97	8188.34	8323.79	8351.2	8061.36	7932.76	8208.57	7786.53	7807.79	7740.59	8019.9	7884.72
GO_INTERLEUKIN_8_SECRETION	8118.72	8217.2	8128.62	8398.31	8108.83	8189.53	8265.2	7735.46	8138.17	6597.4	6053.18	7579.37	7355.33	8401.06	7754.93
GO_MACROPHAGE_ACTIVATION	8118.37	8070.8	8104.48	8600.06	8344.06	8112.88	8015.38	8312.11	8190.65	7139.25	8123.86	8420.24	8311.23	7791.19	7060.04
GO_POSITIVE_REGULATION_OF_MRNA_METABOLIC_PROCESS	8117.79	8066.75	8116.96	8006.36	7980.43	8118.61	8114.88	8548.86	8340.07	8233.71	7857.91	8451.16	8543.76	8283.25	7824.76
GO_DENDRITIC_CELL_MIGRATION	8114.83	7840.75	7395.51	8365.93	8132.74	8108.27	7973.88	8146.47	8121.4	7061.97	7409.28	8762.71	8247.34	8169.16	6797.87
GO_VESICLE_BUDDING_FROM_MEMBRANE	8113.88	8141.6	7998.26	8037.9	8065.07	8169.74	8226.73	8124.89	7837.21	8102.87	8211.04	8161.76	7945.38	8176.22	8042.45
GO_GOLGI_VESICLE_BUDDING	8112.58	8253.59	8129.45	8095.72	8176.67	8254.9	8313.29	7910.43	7714.07	8156.32	8089.54	8047.78	7742.15	8146.14	7649.02
GO_NEGATIVE_REGULATION_OF_NF_KAPPAB_TRANSCRIPTION_FACTOR_ACTIVITY	8108.53	8083.83	8297.98	8209.65	8093.47	8048.54	7962.72	8641.32	8578.05	7499.05	7052.79	8363.59	8156.2	8123.6	7740.29
GO_NUCLEAR_ENVELOPE_ORGANIZATION	8105.35	8377.9	8399.12	8210.17	8039.15	8411.25	8331.4	8250.61	7871.59	7196.89	6946.1	8171.56	8023.51	7497.36	7139.46
GO_GLYCOSYLCERAMIDE_METABOLIC_PROCESS	8105.24	8581.32	8588.17	8411.55	8296.33	8089.99	8120.5	7896.81	7649.26	9189.51	7738.43	7145.54	6450.17	8293.96	6743.1
GO_REGULATION_OF_PROGRAMMED_NECROTIC_CELL_DEATH	8103.89	7156.36	7553.39	8338.05	8115.62	7830.65	8002.66	8831.51	8270.69	8092.15	7836.33	8750.06	8619.56	7040.45	8546.44
GO_CELLULAR_RESPONSE_TO_LITHIUM_ION	8100.99	7287.56	7719.95	8289.01	8000.93	6431.98	7705.46	7734.55	8864.26	8201.05	9679.12	9030.89	8281.3	9242.91	6305.52
GO_NUCLEAR_TRANSCRIBED_MRNA_POLY_A_TAIL_SHORTENING	8098.78	8764.74	8415.07	8932.29	8765.12	8356.02	8107.84	7639.43	7653.8	8089.71	7651.62	8205.52	7816.19	7927.71	7141.8
GO_REGULATION_OF_T_HELPER_17_TYPE_IMMUNE_RESPONSE	8098.14	7878.87	7984.01	8741.42	8492.64	7754.72	7778.65	8212.27	8593.95	5438.73	6765.7	8346.56	8432.9	8900.22	6714.76
GO_NLRP3_INFLAMMASOME_COMPLEX_ASSEMBLY	8096.07	7904.32	7566.46	8200.11	7996.16	8208.97	8195.99	7579.15	8463.53	6100.5	7632.2	8703.87	8407.39	8415.43	6996.88
GO_MATURE_B_CELL_DIFFERENTIATION	8094.31	8517.6	8236.76	8581.68	8378.12	8418	7708.83	8024.3	7747.62	5373.62	6856.48	8775.83	8164.32	7930.34	5766.79
GO_ATP_METABOLIC_PROCESS	8092.66	8032.22	7874.48	8190.39	8000.98	8189.29	7904.62	8361.38	7767.52	8266.98	8153.09	8220.95	7980.21	8441.63	7621.96
GO_POSITIVE_REGULATION_OF_MRNA_PROCESSING	8091.44	8155.23	8188.87	7756.92	7739.31	8239.21	7681.33	8027.64	7741.25	7913.49	7504.42	8335.53	8568.51	8293.5	8235.65
GO_NEGATIVE_REGULATION_OF_INTERLEUKIN_10_PRODUCTION	8090	7684.38	7602.34	8720.71	8034.3	8845.99	8767.4	8145.7	8227.53	5775.73	7704.52	8563.75	8408.4	7619.34	5049.96
GO_VESICLE_TARGETING_TO_FROM_OR_WITHIN_GOLGI	8089.81	8284.91	8136.82	8109.06	8155.78	8142.63	8215.79	7814.42	7622.96	8147.06	8054.71	7836.53	7576.21	8070.56	7536.98
GO_PROTEIN_AUTO_ADP_RIBOSYLATION	8087.95	7384.09	7048.12	8120.33	8055.57	7723.5	7471.1	9170.56	8803.12	8374.85	7802.83	9212.58	9007.31	7936.49	8390.9
GO_REGULATION_OF_INTERLEUKIN_1_SECRETION	8085.88	8853.55	9006.25	9100.16	9057.39	7926.17	8227.86	7733.81	7943.89	7066.21	7562.34	8804.26	8741.25	7385.51	7678.31
GO_MODULATION_BY_SYMBIONT_OF_HOST_CELLULAR_PROCESS	8085.84	7739.3	7484.73	8500.01	8005.46	7880.05	7951.43	8657.99	8240.97	8274.26	8824.75	8348.43	8166.21	7809.28	6393.03
GO_INTRINSIC_APOPTOTIC_SIGNALING_PATHWAY_IN_RESPONSE_TO_ENDOPLASMIC_RETICULUM_STRESS	8083.54	7938.7	8268.66	8139.21	8001.17	7800.04	7761.39	8430.93	8317.7	8457.73	8400.48	7984.3	7900.93	8027.87	8732.21
GO_REGULATION_OF_AMYLOID_BETA_FORMATION	8082.46	8091.45	8073.46	8167.8	7984.74	8657.2	8569.29	8345.16	8776.41	7527.11	8699.18	7624.48	8067.12	7508.54	7034.62
GO_PURINE_NUCLEOSIDE_TRIPHOSPHATE_METABOLIC_PROCESS	8080.11	8239.91	8085.11	8403.59	8083.81	8071.65	8076.4	8525.93	7975.9	7997.52	8166.74	7865.98	7678.9	8378.82	7376.05
GO_REGULATION_OF_SYMBIOSIS_ENCOMPASSING_MUTUALISM_THROUGH_PARASITISM	8078.02	7894.25	7688.11	8021.17	7900.13	8120.04	8035.99	9134.37	8824.16	8245.04	8230.52	8734.16	8568.81	7827.16	7773.86
GO_REGULATION_OF_DNA_DAMAGE_RESPONSE_SIGNAL_TRANSDUCTION_BY_P53_CLASS_MEDIATOR	8077.84	8471.59	8183.06	8270.36	8257.37	7570.86	6974.13	8537.38	8370.06	7663.43	7964.69	8558.1	7972.62	7640.71	6757.33
GO_CD4_POSITIVE_OR_CD8_POSITIVE_ALPHA_BETA_T_CELL_LINEAGE_COMMITMENT	8076.6	8084.43	8068.77	8016.8	8217.43	7053.51	6353.96	8582.05	8786.31	2550.46	4633.19	8881.06	8824.88	8299.78	5599.76
GO_AMINO_SUGAR_CATABOLIC_PROCESS	8073.48	8394.4	7967.54	8466.39	8263.66	8053.05	8093.91	7196.08	7402.03	9178.16	8301.86	6924.89	7163.59	7748.91	8497.44
GO_ASTROCYTE_ACTIVATION	8070.89	8501.48	8255.57	8108.28	8612.82	7634.53	6960.65	8083.79	8334.19	6440.81	8165.41	7869.05	8057.98	7885.29	7480.31
GO_MYELOID_CELL_HOMEOSTASIS	8061.01	8195.43	7830.63	8281.4	8023.89	8098.14	7816	8577.18	8491.63	7458.14	7652.03	8176.58	7964.53	8131.11	7797.68
GO_REGULATION_OF_PROTEIN_COMPLEX_STABILITY	8060.02	8121.33	7756.61	7899.84	8200.65	7266.09	7621.64	8287.42	7919.71	7807.04	8905.49	8060.39	8059.65	9004.03	8327.8
GO_REGULATION_OF_IRE1_MEDIATED_UNFOLDED_PROTEIN_RESPONSE	8059.33	7920.38	8224.54	7929.09	7383.46	6349.26	6991.06	8958.92	8840.82	8955.26	8969.83	8189.56	7643.11	7895.39	8450.74
GO_RNA_DESTABILIZATION	8057.93	7478.81	7520.11	7727.74	7640.53	7965.19	8040.2	8922.19	8587.24	8075.67	7622.96	8239.87	8337.82	8430.13	8170.17
GO_NEGATIVE_REGULATION_OF_RECEPTOR_SIGNALING_PATHWAY_VIA_STAT	8051.23	8034.14	8296.05	8424.66	8307.71	7338.96	7371.78	8686.49	8249.16	8041.07	7683.23	8061.39	8235.3	7547.05	6890.6
GO_POSITIVE_REGULATION_OF_PROTEIN_DEPHOSPHORYLATION	8049.86	7971.14	8055.61	8349.95	8044.12	8393.43	8226.06	7911.24	8473.28	6734.65	7528.22	8553.22	8320.16	7701.61	7868.11
GO_REGULATION_OF_MEMBRANE_PROTEIN_ECTODOMAIN_PROTEOLYSIS	8047.9	7589.53	7698.45	8115	7762.3	7749.66	7675.32	9481.55	8935.96	8087.74	8924.55	8008.06	7642.25	8284.31	8602.31
GO_POSITIVE_REGULATION_OF_PRI_MIRNA_TRANSCRIPTION_BY_RNA_POLYMERASE_II	8047.48	7949.22	7959.16	8627.09	8105.29	8071.36	8023.59	9257.04	9772.7	7628.87	7896.03	8659.57	8937.23	7543.68	7819.45
GO_CELLULAR_RESPONSE_TO_DSRNA	8047.38	7733.79	7487.36	8124.66	8015.36	7052.58	6853.09	8691.03	8737.55	8079.4	9204.96	9108.53	9053.76	7176.48	7729.53
GO_POSITIVE_REGULATION_OF_PRODUCTION_OF_MOLECULAR_MEDIATOR_OF_IMMUNE_RESPONSE	8045.82	8166.71	8090.01	8220.04	8154.8	7698.2	7556.42	8001.62	8296.84	6083.44	7103.91	8337.2	8401.73	7946.19	7049.48
GO_T_CELL_RECEPTOR_SIGNALING_PATHWAY	8044.39	7993.17	7939.93	8301	7924.49	8265.72	7806.75	8779.87	8594.14	5820.78	6784.92	8482	8440.33	8095.61	6516.13
GO_COPII_COATED_VESICLE_BUDDING	8043.54	8235.48	8056.79	8153.77	8200.5	8200.24	8254.33	7790.19	7536.99	8030.29	7967.29	7916.54	7561.85	8059.68	7513.93
GO_POSITIVE_REGULATION_OF_LEUKOCYTE_CELL_CELL_ADHESION	8042.89	8144.2	7941.59	8418.03	8216.82	7937	7760.2	8284.92	8373.75	5666.56	6679.89	8356.68	8306.59	7751.34	6609.29
GO_HISTONE_H3_DEACETYLATION	8042.37	7782.48	7909.72	8140.8	7762.79	7333.6	8229.31	8331.75	8393.86	8635.79	7938.03	8036.68	8271.2	8048.06	7820.69
GO_POSITIVE_REGULATION_OF_MONONUCLEAR_CELL_MIGRATION	8042.05	8193.98	7371.24	7500.76	7695.41	7890.12	8631.59	9531.89	9445.37	7190.39	9114.77	9148.91	8581.91	7797.82	7838.55
GO_POSITIVE_REGULATION_OF_MYELOID_CELL_DIFFERENTIATION	8040.03	8228.82	7962.27	8513.89	8117.78	7672.7	7809.47	8376.58	8668.17	7055.59	7741.86	8371.77	8375.06	7942.48	7351.9
GO_IRE1_MEDIATED_UNFOLDED_PROTEIN_RESPONSE	8035.93	7721.76	8164.89	7858.57	7514.71	7329.13	7292.35	8194.53	8482.09	8169.38	8012.55	7944.13	8059.31	8288.8	8154.29
GO_RESPONSE_TO_TYPE_I_INTERFERON	8033.87	7715.85	7561.64	8099.79	8114.54	7872.77	8010.56	8897.12	8683.33	7243.35	8038.52	10364.8	10202.8	7594.74	8029.22
GO_POSITIVE_REGULATION_OF_B_CELL_DIFFERENTIATION	8033.69	8272.13	8172.52	8067.31	7776.19	8335.49	8000.07	8552.45	8491.91	6050.64	6870.41	7783.5	8292.7	7927.13	7260
GO_RNA_INTERFERENCE	8032.55	8531.76	7758.86	7443.72	7602.09	8475.67	8823.23	8136.15	7263.25	7887.81	7985.27	8528.09	8104.71	8079.83	6417.2
GO_POSITIVE_REGULATION_OF_ESTABLISHMENT_OF_PROTEIN_LOCALIZATION_TO_MITOCHONDRION	8028.91	7959.57	8127.31	7764.82	7710.99	8144.37	8011.5	8633.77	8247.91	7726.58	7723.4	8287.26	8046.32	8209.57	7899.04
GO_CHROMATIN_DISASSEMBLY	8028.41	7835.43	7920.51	8042.72	7723.17	8862.03	8787	8459.57	8807.23	6816.03	7251.94	7668.3	8014.09	8299.8	8909.58
GO_REGULATION_OF_ESTABLISHMENT_OR_MAINTENANCE_OF_CELL_POLARITY	8027.47	7867.05	7526.64	7845.66	7772.97	8359.4	8101.21	8408.96	8072.36	6917.28	6794.09	8724.65	8677.57	7982.57	8136.56
GO_T_HELPER_17_TYPE_IMMUNE_RESPONSE	8027.07	7777.84	7745.02	8671.39	8470.95	7708.22	7356.12	8489.79	8642.73	5135.82	6380.97	8276.3	8322.67	8659.52	6245.67
GO_POSITIVE_REGULATION_OF_HEMOPOIESIS	8026.52	8092.45	7917.98	8331.21	8084.94	7699.51	7685.76	8328.79	8485.88	6570.52	7366.32	8466.39	8455.77	7968.1	7238.16
GO_NEUTROPHIL_MIGRATION	8025.04	8357.39	8199.71	8455.54	8469.93	7972.73	8226.14	8137.01	7912.58	7422.39	7993.57	8014.05	7612.89	8036.04	7236.65
GO_PRO_B_CELL_DIFFERENTIATION	8024.43	9317.9	9046.9	9177.92	9271.51	7767.17	7471.5	6892.46	6531.36	8281.69	7121.02	7425.19	6863.76	8405.38	8438.3
GO_POSITIVE_REGULATION_OF_MULTI_ORGANISM_PROCESS	8024.21	8192.12	7934.03	8047.57	7955.08	8192.13	8050.02	8418.69	8259.53	7277.05	7663.66	8093.02	8000.84	7879.27	7486.24
GO_POSITIVE_REGULATION_OF_HORMONE_METABOLIC_PROCESS	8023.45	8402.09	8103.36	8485.5	8191.2	7554.68	7467.21	8109.71	8000.56	6886.32	8128.93	7993.5	7647.8	8046.34	7821.11
GO_POSITIVE_REGULATION_OF_RELEASE_OF_CYTOCHROME_C_FROM_MITOCHONDRIA	8021.97	8374.51	8189.03	8323.58	7676.07	7789.86	7582.02	8659.82	8207.22	8665.1	8349.95	7854.91	7630.66	7370.66	7610.69
GO_RESPIRATORY_ELECTRON_TRANSPORT_CHAIN	8020.14	7969.88	7865.43	8070.41	7923.03	8250.59	7840.4	8677.16	7520.84	8499.89	8469.91	8430.4	7901.34	8635.6	7521.31
GO_NEGATIVE_REGULATION_OF_OXIDATIVE_STRESS_INDUCED_INTRINSIC_APOPTOTIC_SIGNALING_PATHWAY	8020.01	7933.65	8024.31	8015.7	7549.65	8442.42	7819.82	8426.02	8037.04	8485.13	8998.35	7372.85	7313.52	8005.13	9072.3
GO_NEGATIVE_REGULATION_OF_PLATELET_DERIVED_GROWTH_FACTOR_RECEPTOR_SIGNALING_PATHWAY	8018.68	7563.23	8260.08	8314.64	8153.93	7817.69	7624.53	9486.31	9739.46	7018.96	7972.87	8041.3	8104.4	7471.67	7996.05
GO_PLATELET_MORPHOGENESIS	8015.33	8198.19	7822.65	8173.41	8119.58	8795.21	8586.65	7646.02	7911.09	5956.72	6657	7850.46	8232.84	7647.64	8121.37
GO_CYTOKINE_METABOLIC_PROCESS	8014.64	8177.32	7978.57	8428.05	8116.53	7886.29	7725.88	8050.71	8309.92	5916.85	6918.19	8533.23	8387.43	7404.63	6741.48
GO_POSITIVE_REGULATION_OF_PROTEIN_MATURATION	8012.82	8451.95	8703.52	8879.3	8696.28	7494.13	7936.85	8040.39	7985.24	6787.76	6719.75	7481.29	7713.29	8666.8	8526.35
GO_NEGATIVE_REGULATION_OF_CELLULAR_RESPONSE_TO_INSULIN_STIMULUS	8012.76	8135.23	7943.98	8588.04	8408.32	8185.25	8256.52	7887.8	7549.8	7143.43	7578.45	8081.54	8210.07	7907.96	7442.75
GO_N_GLYCAN_PROCESSING	8010.56	7820.22	7657.53	8320.44	7670.38	8494.2	8061.94	7959.17	8867.28	6069.97	6163.02	9000.78	9003.84	8088.31	6820.96
GO_GOLGI_TO_PLASMA_MEMBRANE_PROTEIN_TRANSPORT	8002.24	7539.33	7746.04	7343.55	7403.21	7920.18	7861.21	8317.98	8292.96	8674.56	8432.65	8322.42	8084.3	7838.07	8539.91
GO_REGULATION_OF_UNSATURATED_FATTY_ACID_BIOSYNTHETIC_PROCESS	7997.6	8102.33	8401.63	8547.9	8048.28	6862.29	7150.82	7586.21	7734.94	8783.87	9055.77	8261.92	7946.92	7553.63	6510.49
GO_REGULATION_OF_MULTI_ORGANISM_PROCESS	7995.78	8055.73	7811.99	7991.24	7857.7	8071.42	8000.33	8535.86	8364.52	7321	7769.3	8270.96	8154.79	7790.76	7406.79
GO_LEUKOCYTE_HOMEOSTASIS	7993.66	8155.38	7918.84	8299.35	8231.97	8104.75	8044.73	8124.72	7868.32	6255.02	7214.16	8229.65	7789.97	7942.6	7425.82
GO_PROTEIN_DNA_COMPLEX_DISASSEMBLY	7993.51	7803.91	7958.38	7938.82	7598.42	8507.88	8370.84	8433.77	8493.2	6869.81	7576.06	7841.29	8085.58	8028.63	8783.23
GO_POSITIVE_REGULATION_OF_INTERLEUKIN_1_PRODUCTION	7992.85	8353.21	8385.2	8463.38	8223.13	7899.22	7976.57	7717.58	8009.14	7122.02	7358.04	8702.28	8487.73	7222.94	7525.78
GO_POSITIVE_REGULATION_OF_POSTTRANSCRIPTIONAL_GENE_SILENCING	7991.92	7752.98	7732.51	8002.58	7860.32	7922.07	7991.25	8505.21	8013.25	8385.48	7891.52	7739.04	7992.6	8101.02	8865.25
GO_MITOTIC_CYTOKINETIC_PROCESS	7991.82	8333.89	8106.4	7947.27	7940.85	8088.01	8127.99	8251.7	7620.33	7988.98	7689.26	7994.67	7795.2	8398.29	7937.42
GO_NEGATIVE_REGULATION_OF_GLYCOLYTIC_PROCESS	7984.11	7182.13	7684.47	8296.05	7750.68	7753.19	7480.55	8314.17	8626.83	9348.77	8610.94	7562.31	7845.04	8420.36	8123.18
GO_NEGATIVE_REGULATION_OF_EXOCYTOSIS	7983.42	7719.59	7442.54	8443.59	8090.41	8451.41	8354.98	7423.29	8001.44	6696.74	7274.11	7939.17	8016.01	7965.41	8454
GO_NEGATIVE_REGULATION_OF_PROTEIN_LOCALIZATION_TO_CELL_PERIPHERY	7983.39	8011.98	7618	7833.73	7876.18	8541.02	8673.59	7954.8	7919.89	8277.19	8396.05	7546.58	7835.01	8463.98	9855
GO_REGULATION_OF_PROTEIN_LOCALIZATION_TO_ENDOSOME	7982.86	7586.68	7394.71	7964.12	7678.9	8387	8316.03	8317.06	8001.6	8909.93	8798.41	7585.79	7760.39	7902.4	8005.56
GO_NEGATIVE_REGULATION_OF_MYELOID_CELL_DIFFERENTIATION	7981.61	8031.21	7939.56	8165.74	8023.65	7668.16	7692.22	8917.77	8671.39	6865.76	7351.92	8300.79	8376.29	7821.62	7298.41
GO_ALPHA_BETA_T_CELL_PROLIFERATION	7981.4	7904.53	7604.69	8491.44	8102.91	7763.69	8014.52	9119.46	8785.23	5638.54	6957.65	8324.74	8155.14	7948.28	7300.31
GO_NIK_NF_KAPPAB_SIGNALING	7976.41	7955.08	7990.17	8200.08	8126.85	7962.64	7890.37	8050.04	7829.17	7446.87	8025.75	8043.86	7913.25	8134.34	7892.22
GO_SPLICEOSOMAL_TRI_SNRNP_COMPLEX_ASSEMBLY	7976.22	7644.8	8063.38	7558.96	7519.32	7498.76	7680.01	8200.53	8568.31	7889.07	8545.19	8446.97	8763.71	7739.43	8933.67
GO_POSITIVE_REGULATION_OF_VIRAL_LIFE_CYCLE	7975.29	7931.2	7562.63	7871.89	7837.97	8133.97	7904.99	8605.23	8056.9	8345.98	7882.79	8151.41	8056.52	8019.38	7580.02
GO_TUMOR_NECROSIS_FACTOR_MEDIATED_SIGNALING_PATHWAY	7974.77	8106.35	7997.08	8094.72	7952.47	7933.75	7751.15	8377.27	8122.24	7200.13	7817.2	8191.55	8203.57	7811.89	7895.21
GO_REGULATION_OF_B_CELL_DIFFERENTIATION	7974.73	8504.45	8449	8410.76	7753.39	8083.89	8189.64	7865.57	8137.65	5530.02	6611.5	7796.75	7792.56	8442.15	7418.68
GO_POSITIVE_REGULATION_OF_APOPTOTIC_SIGNALING_PATHWAY	7973.65	7849.07	7983.13	7972.91	7741.85	7619.49	7563.62	8570.2	8191.98	7974.38	8046.53	7893.44	7786.84	8043.11	8046.71
GO_PROTEIN_INSERTION_INTO_MITOCHONDRIAL_MEMBRANE_INVOLVED_IN_APOPTOTIC_SIGNALING_PATHWAY	7973.65	7948.3	8145.08	7558.15	7522.62	7657.72	7458.94	8823.98	8575.92	7724.39	8218.05	8304.76	8032.92	7999	7221.85
GO_NEGATIVE_REGULATION_OF_AMYLOID_BETA_FORMATION	7970.98	8108.61	7816.08	7833.35	7200.23	8831.73	8745.74	7796.98	9067.59	7294.12	8258.59	7624.69	8159.9	8126.21	7747.86
GO_INNATE_IMMUNE_RESPONSE_ACTIVATING_CELL_SURFACE_RECEPTOR_SIGNALING_PATHWAY	7970.04	8414.63	8154.52	7876.16	7727.2	8053.79	7911.71	8941.14	8498.45	7576.43	7761.84	8009.62	7775.93	8348.05	7930.46
GO_REGULATION_OF_CELLULAR_EXTRAVASATION	7969.49	8158.83	7967.63	7971.35	7862.57	8001.3	7855.24	7971.97	9006.28	7358.8	7081.62	8033.14	8149.96	7143.31	7391.43
GO_POSITIVE_REGULATION_OF_EXTRINSIC_APOPTOTIC_SIGNALING_PATHWAY_VIA_DEATH_DOMAIN_RECEPTORS	7968.84	7739.19	8001.04	8238.91	7936.64	6832	7342.08	8698.85	7676.3	8087.09	8047.29	7922.11	7189.5	9234.75	9692.92
GO_REGULATION_OF_CYSTEINE_TYPE_ENDOPEPTIDASE_ACTIVITY	7965.85	7894.9	7990.41	8193.56	7985.95	7953.53	7897.16	8314.63	8297.99	7911.92	7749.1	7978.18	7859.87	8106.99	7913.56
GO_ESTABLISHMENT_OF_ENDOTHELIAL_BARRIER	7964.49	7633.36	7596.7	8008.5	7975.57	7758.57	7869.72	8425.18	8453.11	8482.25	8426.3	7820.88	7503.22	7953.41	7979.78
GO_REGULATION_OF_IMMUNOGLOBULIN_SECRETION	7956.43	7608.48	8077.86	8383.92	8121.23	6128.2	5679.41	7597.56	8078.13	6495.97	8325.8	7994.58	8416.4	7918.29	7217.54
GO_AUTOPHAGIC_CELL_DEATH	7955.63	8238.37	8090.64	8157.78	8082.64	8444.36	8217.41	8569.91	7828.62	6818.6	6503.69	7449.2	7456.92	7030.31	7474.05
GO_GOLGI_TO_VACUOLE_TRANSPORT	7955.04	8021.46	7888.63	7832.11	7241.74	8213.47	8101.12	8179.76	8031.11	6867	7259.32	7790.95	8088.01	7796.87	8127.11
GO_POSITIVE_REGULATION_OF_CYSTEINE_TYPE_ENDOPEPTIDASE_ACTIVITY	7955.02	7695.99	7806.97	8016.47	7735.16	7988.59	7839.46	8165.85	8281.88	7595.11	7556.24	8050.07	7957.26	7952.79	7971.25
GO_REGULATION_OF_AUTOPHAGOSOME_ASSEMBLY	7953.47	7974.72	8208.93	8220.13	8007.92	8607.46	8611.04	7689.79	7426.86	7932.22	7176.68	7475.89	7351.13	7845.48	8148.78
GO_POSITIVE_REGULATION_OF_CHEMOKINE_SECRETION	7948.39	7540.47	7492.04	8523.5	8369.56	7734.86	7754.51	7285.19	8142.28	7473.42	8247.96	8555.38	8405.33	8781.42	7176.82
GO_REGULATION_OF_VITAMIN_METABOLIC_PROCESS	7947.52	8226.6	8404.75	8364.51	7668.45	6613.35	5842.5	9357.94	9431.81	5366.57	7628.94	8298.01	8262.56	7145.83	5793.57
GO_NOTCH_RECEPTOR_PROCESSING	7946.78	8464.19	8274.48	7989.81	7712.63	7996.84	7531.67	7688.13	6976.85	8966.81	8364.88	7903.75	7461.5	8093.49	6450.66
GO_IMMUNOLOGICAL_MEMORY_PROCESS	7944.43	7622.54	7492.81	8040.96	7825.23	7209.98	7897.03	8004.94	8686.5	7601.68	7083.4	8876.15	9058.08	8012.2	7991.82
GO_ORGANELLE_DISASSEMBLY	7943.04	8203.56	8223.92	7971.32	7913.81	7914.76	7671.01	8266.25	8019.56	8558.25	8312.91	7715.69	7632	7815.18	7166.7
GO_REGULATION_OF_HISTONE_DEACETYLATION	7941.65	7838.5	7808.22	8387.55	7895.07	7988.23	8357.42	8222.56	8139.74	6862.96	7417.07	7447.59	7423.16	8318.58	8710.35
GO_T_HELPER_1_CELL_DIFFERENTIATION	7938.52	7402.32	7214.59	8147.53	8105.95	7917.62	7959.43	8415.39	8626.68	6897.58	7345.08	8934.84	8741.62	6900.19	7050.88
GO_EPIBOLY	7937.21	7911.44	8002.55	7962.98	7682.27	8284.23	8325.51	8453.6	8734.17	6858.43	7388.89	7424.17	7242.34	8574.43	7064.57
GO_ENDOPLASMIC_RETICULUM_UNFOLDED_PROTEIN_RESPONSE	7933.07	7826.02	8087.39	7844.2	7624.01	7430.24	7173.71	8368.16	8234.81	8383.73	8094.39	7823.39	7754.23	8442.89	8021.93
GO_LYMPHOCYTE_HOMEOSTASIS	7931.27	8046.27	7887.98	8144.47	7974.55	8091.63	8044.32	8002.03	7659.59	5844.76	6830.97	8172.3	7708.15	7555.73	7170.48
GO_NEGATIVE_REGULATION_OF_GENE_SILENCING_BY_MIRNA	7928.25	7530.95	8031.95	7869.73	7986.77	8315.02	8169.17	7120.38	7700.8	6629.98	7472.39	8385.74	8135.24	7694.35	8229.35
GO_RESPONSE_TO_NITROSATIVE_STRESS	7927.54	7879.85	7975.22	7541.05	7997.96	7301.9	7594.2	8829.65	8231.88	9286.62	9529.57	7596.53	7385.02	8213.37	6963.37
GO_INTERFERON_BETA_PRODUCTION	7927.48	7894.53	7781.78	8150.07	7960.43	8309.79	7854.48	8493.32	8104.14	7869.61	7637.88	8455.52	8542.64	7092.15	6915.47
GO_REGULATION_OF_TRANSCRIPTION_ELONGATION_FROM_RNA_POLYMERASE_II_PROMOTER	7924.23	7826.95	7757.78	8021.51	7656.82	8159.87	8052.7	8246.87	8295.29	7091.94	6873.78	8292.5	8384.94	7743.71	7652.95
GO_INTERLEUKIN_8_PRODUCTION	7923.45	8252.27	8199.96	8393.05	8175.14	7979.19	7979.75	7585.2	8034.33	7155.81	7008.74	7867.72	7739.32	7504.98	7528.57
GO_MAINTENANCE_OF_PROTEIN_LOCALIZATION_IN_ENDOPLASMIC_RETICULUM	7923.06	7755.23	7662.04	8401.58	7909.2	7669.82	7598.67	7918.84	7927.27	8453.15	8179.68	7739.82	8111.54	9324.37	9371.53
GO_I_KAPPAB_KINASE_NF_KAPPAB_SIGNALING	7920.67	7927.19	7771.06	8050	7931.24	7728.71	7796.39	8417.55	8181.11	7720.65	8090.58	8143.16	7914.15	7720.84	7482.09
GO_POSITIVE_REGULATION_OF_TRIGLYCERIDE_METABOLIC_PROCESS	7918.75	8300.51	8627.81	8622.99	8101.96	8246.98	8216.13	6412.23	7735.55	6171.57	6843.21	6036.91	7012.24	8238.61	6561.11
GO_POSITIVE_REGULATION_OF_T_CELL_MIGRATION	7918.56	8235.95	8112.92	8174.98	8131.73	7633.96	7481.17	8516.86	7487.81	6347.78	7840.12	8876.13	7997.01	7618.64	6981.53
GO_MYELOID_DENDRITIC_CELL_ACTIVATION	7918.34	7912.07	7791.92	8106.44	7924.61	8225.54	8000.86	7999.85	7910.64	5090.5	6182.43	8274.92	8270.79	7412.38	5508.62
GO_NEGATIVE_REGULATION_OF_VIRAL_PROCESS	7917.44	7605.82	7535.57	7834.9	7627.45	7917.06	7917.83	9293.14	9160.89	8134.59	8211.62	9366.32	9261.5	7213.93	7719.68
GO_RESPONSE_TO_INTERLEUKIN_4	7915.87	7683.33	7769.9	8225.95	8093.48	8061.84	7383.3	8299.06	7757.12	6806.35	7186.24	8342.86	8119.11	7622.66	8131.19
GO_POSITIVE_REGULATION_OF_LEUKOCYTE_MIGRATION	7915.78	8049.04	7780.02	8064.27	8035.64	7406	7630.93	8164.21	8027.1	6761.53	7531.71	8186.95	7963.68	7867.89	7255.94
GO_NEUROINFLAMMATORY_RESPONSE	7913.91	8077	7832.29	8286.12	8153.94	7944.01	7671.21	8333.95	8176.36	7038.37	7883.81	7974.82	7743	7511.9	7244.5
GO_LIPID_STORAGE	7911.17	8316.56	8573.05	8621.59	8435.72	7627.83	7784.25	7594.84	8385	7894.41	7927.94	7772.11	7756.8	8654.48	7525.4
GO_TROPHECTODERMAL_CELL_DIFFERENTIATION	7911.15	8171.23	7833.5	8049.56	7900.15	8368.59	7844.45	8632.05	8736.81	5866.09	6422.66	7311.88	7103	7922.15	7927.74
GO_LEUKOCYTE_MEDIATED_IMMUNITY	7905.8	8092.27	7884.6	8088.58	7910.51	8100.92	8003.87	7901.09	7827.87	6256.23	6868.74	8173.06	7958.56	7837.34	7338.98
GO_REGULATION_OF_ALPHA_BETA_T_CELL_ACTIVATION	7903.16	7880.01	7746.59	8514.25	8167.77	7926.32	7868.13	8519.6	8538.31	6082.58	7192.92	8882.92	8756.24	7692.88	6860.54
GO_ENDOCYTIC_RECYCLING	7900.84	7815.19	7772.29	7646.99	7573.01	8050.97	7978.68	8175.43	7995.68	7451.82	7368.91	7871.36	7930.33	8029.63	8228.75
GO_REGULATION_OF_ANTIGEN_RECEPTOR_MEDIATED_SIGNALING_PATHWAY	7900.82	8097.95	7814.57	8058.84	7800.21	7940.79	7460.99	8184.03	8351.38	5690.44	6101.8	8408.58	8276.55	7860.85	6337.78
GO_LIPID_IMPORT_INTO_CELL	7893.87	7835.69	8141.83	7952.05	7506.43	7612.16	6778.85	7788.74	8692.41	7158.91	8692.21	8552.3	8931.42	8681.28	5363.44
GO_NEGATIVE_T_CELL_SELECTION	7893.69	7970.83	7248.33	8361.57	7816.56	8169.19	7452.61	9142.95	8680.86	2124.87	3530.89	8592.85	8320.05	7639.79	6829.4
GO_NEGATIVE_REGULATION_OF_AUTOPHAGY	7891.55	7802.38	8014.59	7985.95	7852.14	7981.29	7889.88	7932.39	8041.79	7543.06	7229.99	7944.87	7893.22	7850.53	7635.74
GO_NADPH_REGENERATION	7891.07	7585.64	8340.5	7596.98	7662.5	9118.42	8119.04	8687.71	7663.1	7400.36	6887.8	8720.73	8547.11	8260.24	7614.56
GO_POSITIVE_REGULATION_OF_NEURON_DEATH	7889.79	7783.84	7813.09	8094.75	7767.89	8006.03	7889.95	8368.58	8397.74	7457.86	7661.42	8038.03	8184.02	7889.64	7543.23
GO_REGULATION_OF_EXTRINSIC_APOPTOTIC_SIGNALING_PATHWAY	7889.22	7757.91	7957.44	7612.15	7427.74	7337.39	7390.58	8569.16	8325.22	7925.81	8086	7871.84	7662.19	7915.34	7906.6
GO_REGULATION_OF_LIPOPOLYSACCHARIDE_MEDIATED_SIGNALING_PATHWAY	7888.44	8357.38	7849.14	8195.97	8202.75	7936.22	7927.73	7736.14	7823.19	7405.42	8070.79	7946.78	7702.85	7202.28	7000.4
GO_T_HELPER_1_TYPE_IMMUNE_RESPONSE	7886.38	7592.47	7356.84	8377.9	8337.56	7918.46	7995.39	8277.66	7854.31	7173.62	7644.7	8587.83	8358.68	7325.78	6474.42
GO_RIBONUCLEOSIDE_TRIPHOSPHATE_METABOLIC_PROCESS	7884.51	7897.52	7746.93	8194.99	7787.75	7920.29	7938.34	8422.06	7818.57	7908.04	7871.5	7568.55	7356.06	8143.14	7660.29
GO_ENDOSOMAL_TRANSPORT	7884.45	7902.94	7881.97	7925.91	7766.19	7932.11	8029.79	7910.04	7822.55	7731.54	7550.68	7685.24	7621.7	8045.32	7886.93
GO_CELLULAR_NITROGEN_COMPOUND_CATABOLIC_PROCESS	7878.69	7809.05	7726	7872.74	7701.52	7787.71	7414.35	8464.93	7896.66	7815.84	8135.5	8175.88	7884.64	8463.53	8322.69
GO_IMMUNE_EFFECTOR_PROCESS	7877.54	7876.75	7666.26	7951.86	7749.7	7962.09	7878.33	8010.28	7907.8	6426.65	6967.44	8356.97	8161.57	7681.88	7258.15
GO_NEGATIVE_REGULATION_OF_MYELOID_LEUKOCYTE_DIFFERENTIATION	7873.94	7913.87	7768.24	8257.14	8030.69	7589.36	7655.94	8891.08	8792.92	6782.86	7432.92	8358.58	8360.85	7834	6973.62
GO_REGULATION_OF_INTRINSIC_APOPTOTIC_SIGNALING_PATHWAY_IN_RESPONSE_TO_DNA_DAMAGE_BY_P53_CLASS_MEDIATOR	7869.11	7806.56	7931.65	7935.69	7627.54	7124.91	7084.35	8174.53	6909.44	7949.33	8529.99	7974.6	7538.81	8612.04	7379.75
GO_CD4_POSITIVE_ALPHA_BETA_T_CELL_DIFFERENTIATION	7864.12	7909.52	7812.6	8376.92	8307.62	7818.72	7632.06	8479.3	8677.46	6048.77	7078.71	8659.21	8524.43	7794.41	7248.23
GO_POSITIVE_REGULATION_OF_AUTOPHAGY	7863.23	7957.2	7742.86	8097.98	7983.52	7803.98	7906.55	7942.82	7959.89	7460.18	7417.09	7789.38	7802.42	7959.49	7819.91
GO_NEGATIVE_REGULATION_OF_PEPTIDYL_TYROSINE_PHOSPHORYLATION	7862.25	7888.84	8160.26	7758.44	7505.09	7675.18	7836.24	8437.85	8163.5	7998.78	7357.3	7843.65	7880.86	7480.98	8005
GO_VESICLE_TARGETING	7860.6	8107.48	7983.47	7873.42	7847.77	8036.17	8006.14	7754.78	7525.18	7933.58	7955.72	7560.67	7296.63	7725.36	7405.02
GO_NEGATIVE_REGULATION_OF_GLUCOSE_TRANSMEMBRANE_TRANSPORT	7860	7714.75	7706.8	8362.76	7925.84	8310.9	7841.06	6487.27	7942.49	6517.73	8109.2	7211.37	7439.66	7878.94	8339.32
GO_REGULATION_OF_PROTEIN_AUTOPHOSPHORYLATION	7859.32	8075.55	7841.37	7863.9	7854.73	7835.39	7595.38	8498.63	8371.61	7559.72	8087.5	7930.56	7558.82	9043.87	7052.01
GO_MACROAUTOPHAGY	7857.4	8002.03	7924.97	8056.27	7921.8	7961.8	7947.65	7765.13	7725.64	7711.8	7531.19	7778.23	7793	8074.54	7517.54
GO_REGULATION_OF_REACTIVE_OXYGEN_SPECIES_BIOSYNTHETIC_PROCESS	7854.52	8330.84	8262.59	8089.06	8061.14	7589.36	7552.59	8082.48	7944.7	7092.65	7764.34	8102.32	7729.73	7564.07	7603.37
GO_ARP2_3_COMPLEX_MEDIATED_ACTIN_NUCLEATION	7852.06	7954.41	7998.15	8203.58	7837.11	8394.74	8268.65	7867.02	7722.61	8264.69	7298.48	7813.12	7771	7466.99	7696.86
GO_NEGATIVE_REGULATION_OF_CYTOKINE_BIOSYNTHETIC_PROCESS	7850.7	8037.91	8096.85	7671.36	7727.26	8205.43	7728.64	7972.75	8745.26	5818.01	6906.42	8542.61	8353.57	6291.96	6182.93
GO_SECRETORY_GRANULE_ORGANIZATION	7849.87	7388.13	7865.49	7451.44	7834.26	8192.76	8127.63	8145.26	7870.5	6811.35	6630.64	8756.12	8257.21	6479.49	6324.04
GO_REGULATION_OF_SPINDLE_ASSEMBLY	7846.64	8046.99	8092.43	7698.92	7480.44	8055.69	7857.01	8527.59	7563.98	8056.85	7588.91	7836.26	7350.68	7725.31	7866.61
GO_NEGATIVE_REGULATION_OF_VIRAL_LIFE_CYCLE	7845.34	7450.27	7292.84	7705.46	7407.27	7823.51	7867.17	9158	9008.75	8106.2	8243.85	9451.13	9362.21	6710.57	7395.52
GO_ERYTHROCYTE_HOMEOSTASIS	7845.25	8053.15	7672.27	8098.74	7825.83	7950.92	7609.73	8354.33	8314.8	7363.65	7396.89	8028.03	7779.71	7864.66	7650.7
GO_LOW_DENSITY_LIPOPROTEIN_PARTICLE_RECEPTOR_CATABOLIC_PROCESS	7844.87	6556.61	6433.14	6918.88	6824.8	8071.41	7921.2	8254.26	7927.88	7768.55	7942.53	7107.4	7011.87	8055.02	8348.01
GO_INTRINSIC_APOPTOTIC_SIGNALING_PATHWAY_IN_RESPONSE_TO_DNA_DAMAGE	7844.73	7713.58	7805.83	7691.83	7503.89	7464.89	7578.54	8422.3	8125.59	8272.98	8110.92	7883.64	7921.12	7994.39	7531.56
GO_CELLULAR_RESPONSE_TO_FLUID_SHEAR_STRESS	7844.68	8453.84	8447.54	8156.74	7684.67	6766.91	7599.55	7958.38	7831.59	7353.53	6704.94	7857.77	7734.98	8810.33	8319.43
GO_ACTIVATION_OF_MAPKKK_ACTIVITY	7843.52	7150.4	7750.8	7724.17	7048.15	6696.33	7578.57	9125.81	9313	7795.34	8104.68	8505.83	8655.12	7891.7	8062.42
GO_REGULATION_OF_EXOSOMAL_SECRETION	7839.53	7860.91	7748.3	7851.75	7774.5	7466.73	7489.08	8110.24	8511.24	7714.25	8494.34	7834.31	7844.74	7154.69	8647.93
GO_LOW_DENSITY_LIPOPROTEIN_PARTICLE_CLEARANCE	7838.34	7567	7465.63	7737.93	7553.65	8122.43	8195.41	7844.1	8368.89	7575.9	7774.46	7832.57	7968.97	8856.07	8320.36
GO_REGULATION_OF_ERAD_PATHWAY	7837.85	7840.47	7835.23	8003.61	7929.41	7762.43	7551.93	7643.66	7698.19	8090.47	8453.48	7780.71	7900.37	8240.46	7621.03
GO_POSITIVE_REGULATION_OF_INTERLEUKIN_1_SECRETION	7837.2	8530.9	8726.09	8742.27	8689.92	7712.44	7961.95	7052.22	7381.7	6857.17	7250.33	8596.3	8351.72	7015.6	7538.67
GO_REGULATION_OF_ENDOPLASMIC_RETICULUM_STRESS_INDUCED_INTRINSIC_APOPTOTIC_SIGNALING_PATHWAY	7831.97	7794.01	8016.55	7869.93	7693.6	7423.29	7301.35	8320.79	7693.9	8629.59	8395.03	7696.17	7499.18	8319.89	8813.31
GO_CELLULAR_RESPONSE_TO_BIOTIC_STIMULUS	7831.1	7902.05	7882.65	8000.18	7858.91	7498.88	7556	8000.2	7894.77	6668.01	7488.4	8065.75	7803.29	7539.37	6973.25
GO_POSITIVE_REGULATION_OF_ENDOPLASMIC_RETICULUM_UNFOLDED_PROTEIN_RESPONSE	7830.92	7223.03	7639.94	7467.3	6791.71	6905.06	7464.8	9316.75	8476.19	8431.52	8265.59	8000.21	7782.41	7879.43	8797.86
GO_MEMBRANE_LIPID_CATABOLIC_PROCESS	7829.77	8117.92	8231.24	8343.2	8203.09	7502.27	7435.51	7744.79	7876.59	7174.92	7822.82	7836.71	7550.25	8070.68	7167.87
GO_MYELOID_LEUKOCYTE_DIFFERENTIATION	7825.75	7887.71	7627.7	8079.87	7851.49	7723.6	7726.69	8204.48	8209.92	6615.49	7166.87	7867.5	7800	7863.86	7402.67
GO_REGULATION_OF_LEUKOCYTE_APOPTOTIC_PROCESS	7825.05	7849.08	7801.03	8340.15	7992.54	7771.65	7654.81	8323.19	8309	6707.92	7021.09	8367.73	8220.04	7623.79	6697.56
GO_REGULATION_OF_HISTONE_PHOSPHORYLATION	7824.2	7789.53	7858.87	8013.74	8232.41	7948.49	7295.31	7916.14	7695.49	8066.64	5684.34	7175.03	7523.63	7119.2	7949.3
GO_REGULATION_OF_RECEPTOR_BIOSYNTHETIC_PROCESS	7820.78	8814.35	8791.09	7725.01	7916.55	7359.82	6865.54	8309.74	8555.33	4242.44	6885.05	8868.9	8553.32	7692.64	6167.79
GO_REGULATION_OF_TYPE_I_INTERFERON_MEDIATED_SIGNALING_PATHWAY	7816.01	7485.92	7509.82	7783.44	7848.58	7849.39	8031.86	7905.9	8094.77	6657.56	7594.51	8475.41	8339.36	7548.31	7203.89
GO_APOPTOTIC_CELL_CLEARANCE	7812.64	7448.76	7660.68	8182.56	7532.4	7825.47	7713.65	8077.38	8734.23	6562.55	7799.81	8495.97	8924.8	8556.21	6450.27
GO_RESPONSE_TO_INTERLEUKIN_18	7811.65	8088.92	7811.6	8052.44	7811.69	7887.14	8329.23	9492.96	8959.62	7212.89	7685.37	6978.9	6692.24	6103.62	5923.96
GO_MYELOID_CELL_DIFFERENTIATION	7810.61	7920.96	7655.1	7980.36	7787.53	7855.7	7730.42	8195.31	8200.94	6928.5	7236.85	7916.11	7833.69	7758.67	7489.34
GO_POSITIVE_REGULATION_OF_RESPONSE_TO_EXTERNAL_STIMULUS	7810.5	8018.66	7780.97	7986.59	7826.36	7782.38	7784.82	8202.88	8086.21	6878.31	7502.92	7872.12	7794.64	7841.5	7347.72
GO_RESPONSE_TO_TOPOLOGICALLY_INCORRECT_PROTEIN	7810.05	7750.36	7856.98	7875.12	7659.55	7298.58	7063.5	8137.4	7956.44	8254.16	7882.64	7763.12	7572.4	8012.53	7577.47
GO_MIDBODY_ABSCISSION	7809.61	7915.19	7756.21	7666.6	7533.14	7756.74	7862.48	7869.91	7438.54	8243.56	7954.61	7396.75	7180.04	8306.35	7914.27
GO_RESPONSE_TO_TUMOR_NECROSIS_FACTOR	7809.1	7834.49	7721.13	7947.64	7834.49	7279.46	7251.89	7886.63	7814.65	7089.97	7803.76	7901.29	7814.43	7631.06	7374.83
GO_REGULATION_OF_T_HELPER_1_TYPE_IMMUNE_RESPONSE	7807.26	7599.95	7289.95	8444.88	8405.89	7786.91	8068.76	7847.21	7827.6	6395.91	7539.54	8690.53	8436.39	7385.15	6292.03
GO_RIBONUCLEOSIDE_TRIPHOSPHATE_BIOSYNTHETIC_PROCESS	7805.42	7820.2	7701.21	7995.4	7603.55	7709.19	7833.31	8392.21	7790.64	8055.88	8065.54	7340.86	6987.59	8110.21	7610.26
GO_REGULATION_OF_ACTIN_NUCLEATION	7804.78	7476.29	7526.27	7320.62	6886.41	7592.97	7792.67	8036.51	8421.23	7823.9	7771.49	7816.89	8156.55	8132.66	8287.81
GO_RESPONSE_TO_NERVE_GROWTH_FACTOR	7804.7	7728.93	7614.61	8028.58	7639.87	7880.47	8084.3	7979.2	8299.37	7657.75	7948.78	7513.17	7326.22	7708.54	8231.49
GO_REGULATION_OF_MYELOID_CELL_DIFFERENTIATION	7802.95	7921.99	7799.46	8023.58	7806.43	7673.42	7676.19	8275.28	8326.82	6847.65	7207.84	7960.54	7995.13	7672.04	7318.09
GO_VASCULAR_ENDOTHELIAL_GROWTH_FACTOR_RECEPTOR_SIGNALING_PATHWAY	7795.73	7779.61	7858.06	7919.19	7677.48	7745.88	7811.85	7986.41	7933.52	7334.74	7917.32	7560.28	7523.99	8153.84	7575.35
GO_REGULATION_OF_VIRAL_LIFE_CYCLE	7793.76	7617.23	7364.08	7788.35	7594.92	7799.17	7744.98	8990.45	8652.42	8220.29	8138.71	8942.92	8852.62	7359.75	7428.42
GO_CELLULAR_COPPER_ION_HOMEOSTASIS	7788.62	7477.42	7664.25	7536.71	7563.62	7787.44	7687.84	8239.28	8589.19	8350.57	7997.2	8978.17	8998.7	7523.71	7789.8
GO_RNA_SPLICING_VIA_TRANSESTERIFICATION_REACTIONS	7788.14	7887.21	7822.26	7735.19	7669.76	7796.77	7551.1	8036.37	7917.18	7612.89	7564.22	7910.84	7779.51	7860.69	7212.07
GO_POSITIVE_REGULATION_OF_NEUROINFLAMMATORY_RESPONSE	7783.78	6892.6	6736.79	8195.31	7524.28	5984.26	5687.3	7861.41	7814.35	5911.45	8161.89	7850.71	7956.86	8192.84	7753.2
GO_CD4_POSITIVE_ALPHA_BETA_T_CELL_LINEAGE_COMMITMENT	7782.35	7766.41	7744.26	7798.29	8011.23	6761.3	5985.05	8472.27	8727.62	1796.26	4054.45	8753.25	8711.71	8165.35	5268.08
GO_REGULATION_OF_CYTOKINE_PRODUCTION_INVOLVED_IN_IMMUNE_RESPONSE	7780.59	7931.27	7612.45	8369.35	8151.03	7646.25	7628.92	7914.93	8021.44	5926.53	7027.29	8162.11	8194.12	7528.16	6927.11
GO_PRI_MIRNA_TRANSCRIPTION_BY_RNA_POLYMERASE_II	7777.58	7616.81	7716.69	8051.43	7612.67	7574.5	7440.83	9218.26	9311.6	7547.87	7818.48	8205.87	8278.84	7768.62	7786.54
GO_MYELOID_LEUKOCYTE_MIGRATION	7775.91	7832.9	7698.33	7978.54	7899.29	7544.16	7825.84	7919.35	7878.64	6637.14	7421.95	7725.98	7369.53	7942.56	7229.45
GO_EXTRACELLULAR_VESICLE_BIOGENESIS	7773.3	7766.51	7593.03	7826.49	7780.1	7725.78	7736.73	8024.8	8240.58	7838.08	8313.11	7661.24	7672.07	7053.89	8589.01
GO_POSITIVE_REGULATION_OF_DEFENSE_RESPONSE	7772.98	7938.81	7674.84	7925.88	7742.68	7760.29	7751.83	8260.92	8129.66	6928.79	7517.22	7835.32	7785.67	7796.13	7314.04
GO_REGULATION_OF_ASPARTIC_TYPE_PEPTIDASE_ACTIVITY	7771.83	7454.97	7750.2	7771.19	8266.81	8793.16	8508.02	8535.14	7772.47	8517.58	8249.57	6780.6	7380.31	7532.56	7357.7
GO_INTEGRIN_MEDIATED_SIGNALING_PATHWAY	7769.2	7824.72	7815.44	7909.91	7574.1	8018.43	8051.53	8051.99	8096.34	7529.86	7722.96	7374.39	7461.22	7229.73	7178.87
GO_DENDRITIC_CELL_CYTOKINE_PRODUCTION	7767.67	7749.76	6980.54	8467.36	8194.66	7606.79	7420.11	8720.85	7785.57	7668.41	7797.76	8322.8	8156.22	6678.98	6556.05
GO_DOSAGE_COMPENSATION	7767.22	7704.89	7560.92	7829.55	8210.61	8415.64	8369.09	8003.64	8166.4	7624.27	7323.27	7478.76	7397.13	7840.68	6920.95
GO_REGULATION_OF_TOLL_LIKE_RECEPTOR_SIGNALING_PATHWAY	7766.08	8163.44	7979.99	8164.1	8367.28	7992.71	7842.77	7689.39	7850.1	7003.81	6863.39	7408.82	7583.17	6825.43	6513.96
GO_POSITIVE_REGULATION_OF_VIRAL_GENOME_REPLICATION	7766	7770.12	7346.94	7761.88	7666.53	8188.04	7783.82	8348.88	7783.19	7688.27	7289.89	8340.26	7988.28	7522.38	6813.57
GO_NEGATIVE_REGULATION_OF_TELOMERE_MAINTENANCE_VIA_TELOMERASE	7765.61	7365.99	7803.81	8365.28	8238.6	7727.42	7534.35	8329.19	7805.25	7076.11	6470.94	8719.64	8011.77	7525.36	6529.07
GO_SELECTIVE_AUTOPHAGY	7765.22	7623.27	7624.82	7578.86	7689.27	7838.08	7812.88	7733.11	7797.32	7938.53	7716.94	7997.68	8015.49	8007.34	7406.94
GO_LOCOMOTOR_RHYTHM	7764.53	8306.02	7794.71	7960.28	7477.01	6709.65	6894.35	7896.2	7871.15	8228.11	7918.96	6421.73	6656.4	6861.15	7734.35
GO_NEGATIVE_REGULATION_OF_ORGANELLE_ASSEMBLY	7763.2	7700.23	7850.45	7618.1	7611.74	8098.25	8253.78	7902.42	7826.16	7855.29	7860.91	7507.02	7318.7	7252.1	6170.1
GO_REGULATION_OF_CD4_POSITIVE_ALPHA_BETA_T_CELL_ACTIVATION	7762.71	7656.84	7619.12	8338.96	8084.75	7721.12	7804.31	8421.99	8555.91	5996.84	7214.44	8791.02	8555.09	7561.64	6593.01
GO_NADH_DEHYDROGENASE_COMPLEX_ASSEMBLY	7762.52	7616.97	6951.9	7866.94	7483.59	7884.55	7653.1	8576.12	7749.82	8315.72	7779.03	7775.22	7292.61	8166.16	7147.28
GO_CELL_ACTIVATION	7762.27	7876.81	7686.62	7963.82	7760.69	7833.11	7733.66	7895.58	7791.39	6255.84	6766.02	7926.88	7763.85	7680.25	7066.8
GO_REGULATION_OF_ACUTE_INFLAMMATORY_RESPONSE	7762.13	7834.99	7705.08	8262.15	8142.02	6806.16	7072.84	8188.04	8258.31	6654.61	7453.92	7056.05	7078.86	7819.18	8173.73
GO_MULTIVESICULAR_BODY_SORTING_PATHWAY	7760.07	7839.72	7792.36	7551.2	7480.88	7727.78	7991.76	8579.56	7697.45	7997.71	7368.37	7275.32	7282.24	8218.27	8186.76
GO_NEGATIVE_REGULATION_OF_MACROPHAGE_ACTIVATION	7756.23	8041.64	7395.13	8023.96	7700.47	7811.99	8232.47	8778.52	9262.69	6810.87	8570.69	7688.34	7177.36	6773.81	5865.8
GO_INTERLEUKIN_12_SECRETION	7754.6	7244.48	6964.74	8077.55	7559.58	8593.13	8436.75	7949.63	9052.28	5065.96	6968.16	10157	9891.41	6396.42	6667.31
GO_REGULATION_OF_MONOCYTE_CHEMOTAXIS	7748.11	7802.72	7025.46	7187.22	7334.56	7669.23	8353.71	9181.31	9077.48	7483.01	8881.33	8587.9	8032.05	7693.5	7270.94
GO_REGULATION_OF_HEMATOPOIETIC_PROGENITOR_CELL_DIFFERENTIATION	7747.2	7584.7	7535.5	7454.06	7349.39	7587.78	7378.29	8744.53	8234.9	7855.97	8255.12	8016.66	7789.89	8016.4	7704.51
GO_VIRAL_RNA_GENOME_REPLICATION	7744.65	7556.67	7532.13	7932.64	7536.74	8237.73	8018.15	8624.78	8203.17	7523.85	7408	8414.05	8216.32	7169.05	6587.7
GO_RIBOSOMAL_LARGE_SUBUNIT_ASSEMBLY	7744.54	7921.91	8246.3	7567.17	7519.53	6690.26	5880.6	9038.21	7490.04	8563.61	8050.88	7262.92	6982.44	9625.67	7980.92
GO_REGULATION_OF_NUCLEOBASE_CONTAINING_COMPOUND_TRANSPORT	7742.8	7624.62	7863.98	7896.29	7610.27	7907.83	7738.75	7618.66	7819.23	7664.02	7649.83	7746.84	7811.39	7841.76	7534.06
GO_REGULATION_OF_CELLULAR_RESPONSE_TO_HEAT	7740.8	8115.1	7607.94	8163.22	7988.16	7489.06	7364.7	7934.91	7441.25	8018.27	7086.24	7873.67	7549.1	8074.04	7470.17
GO_REGULATION_OF_MRNA_BINDING	7740.04	7718.27	8085.5	7761.81	7187.29	7335.68	7066.57	8168.16	7369.11	8232.28	7999.57	7544.09	7634.81	8831.94	7863.48
GO_MEMBRANE_RAFT_ASSEMBLY	7739.63	7644.89	7417.6	7773.09	7706.16	7366.61	7628.64	9713.9	8302.63	8181.54	7950.79	7058.15	7037.87	8811.59	9108.73
GO_RNA_SPLICING	7737.91	7826.77	7720.7	7724.86	7664.38	7804.85	7544.8	8041.75	7958.15	7598.16	7516.91	7821.16	7750.97	7882.73	7239.29
GO_CLATHRIN_DEPENDENT_ENDOCYTOSIS	7735.99	7734.94	7678.62	7980.1	7714	7737.04	7482.7	8151.12	7995.14	7068.69	7363.54	8217.43	8242.39	8258.93	7643.05
GO_PROTEIN_LOCALIZATION_TO_GOLGI_APPARATUS	7735.24	7766.33	7543.44	7984.78	7711.19	7946.49	8022.73	7602.37	7759.29	7599.02	7479.42	7431.04	7264.74	7850.08	8237.57
GO_MAINTENANCE_OF_PROTEIN_LOCATION	7734.18	7361.76	7445.36	7710.91	7453.79	7469.78	7588.25	8041.75	7971.27	7887.48	7867	7953.01	8044.72	7757.45	7440.03
GO_POSITIVE_REGULATION_OF_P38MAPK_CASCADE	7731.92	7754.75	7768.9	7900.59	8101.29	7313.79	7109.68	7709.08	8071.45	6077.27	7054.01	8271.09	8268.77	6217.64	7535.39
GO_CELLULAR_RESPONSE_TO_TOPOLOGICALLY_INCORRECT_PROTEIN	7731.89	7649.31	7796.68	7667.09	7485.88	7245.7	7042.98	8091.37	7888.35	8103.95	7799.79	7620.04	7443.97	8083.89	7893.45
GO_RESPONSE_TO_MANGANESE_ION	7731.88	7847.47	7651.83	8524.96	8285.01	7726.85	7736.9	5755.63	7395.87	7874.42	8537.34	6779.52	6690.24	7081.73	8738.17
GO_FRUCTOSE_METABOLIC_PROCESS	7730.94	6438.12	7135.89	8057.1	7382.66	8469.72	8050.76	7936.93	8411.17	7139.06	9161.97	6204.53	7337.52	7524.96	8152.74
GO_LEUKOCYTE_CHEMOTAXIS	7730.02	7800.83	7659.21	7894.03	7871.13	7321.7	7589.07	7971.06	7918.07	6507.19	7227.01	7872.33	7414.73	7906.48	6988.57
GO_NEGATIVE_REGULATION_OF_MACROAUTOPHAGY	7728.31	7483.27	7928.39	7623.94	7507.08	7808.07	7789.48	8001.68	7866.15	6885.72	7244.78	8302.02	8101.94	7667.14	7193.23
GO_REGULATION_OF_AUTOPHAGY_OF_MITOCHONDRION_IN_RESPONSE_TO_MITOCHONDRIAL_DEPOLARIZATION	7728.1	7732.88	7748.59	7777.59	7547.77	7722.6	7723.33	7599.03	7670.42	7411.93	7596.26	8025.83	8114.54	7916.43	8512.12
GO_TRAIL_ACTIVATED_APOPTOTIC_SIGNALING_PATHWAY	7728.08	7698.9	7618.98	8412.43	8115.58	7707.14	8442.88	7302.83	7536.55	7324.65	7795.02	7749.03	6869.21	8602.71	7806.27
GO_CELL_REDOX_HOMEOSTASIS	7727.92	7571.97	7702.85	7606.78	7485.21	7892.94	7560.88	8102.37	7980.49	8240.14	8010.04	7711.47	7889.16	7744.37	6890.41
GO_ENTRAINMENT_OF_CIRCADIAN_CLOCK_BY_PHOTOPERIOD	7726.88	7830.75	7952.81	7545.97	6970.44	6600.17	6735.53	8464.07	8516.95	8386.93	8100.55	7570.51	7623.02	8003.99	6992.83
GO_NEGATIVE_REGULATION_OF_STEM_CELL_DIFFERENTIATION	7726.82	7749.19	7704.45	7630.35	7432.66	7604.94	7894.99	8341.22	8232.12	7853.16	7346.27	7409.28	7099.87	7950.57	8693.74
GO_REGULATION_OF_HISTONE_H4_ACETYLATION	7726.13	7797.49	7698	7595.8	7754.26	8311.99	8259.82	7977.38	8545.84	7241.17	7561.1	7541.95	7786.03	7665.62	7598.98
GO_RELEASE_OF_CYTOCHROME_C_FROM_MITOCHONDRIA	7725.37	7549.32	7535.06	7812.98	7098.25	7815.96	7637.75	8373.02	8001.83	8139.57	7893.57	7598.62	7606.01	7476.75	7816.94
GO_ALPHA_BETA_T_CELL_DIFFERENTIATION	7724.36	7777.31	7671.41	8202.74	8087.08	7639.69	7454.59	8299.86	8414.57	5264.64	6486.43	8486.66	8327.33	7494.19	6768.3
GO_REGULATION_OF_LEUKOCYTE_CHEMOTAXIS	7723.74	7780.42	7540.83	7849.04	7698.6	7637.35	7699.22	8257.15	8074.88	6433.46	7258.66	8230.86	7748.26	7763.63	7061.22
GO_POSITIVE_REGULATION_OF_NEURON_APOPTOTIC_PROCESS	7722.46	7483.15	7519.28	7842.9	7507.56	7833.05	7807.73	8273.61	8267.84	7551.39	7443.36	7734.09	7960.56	7710.83	7400.01
GO_CELLULAR_RESPONSE_TO_OXYGEN_LEVELS	7722.25	7523.5	7662.14	7875.49	7729.97	7504.46	7472	7845	7459.76	7842.83	8032.44	7743.08	7545.15	7809.5	7714.53
GO_INTERLEUKIN_10_PRODUCTION	7718.27	7686.25	7375.99	8216.33	7985.03	8487.04	8518.59	8263.93	8056.28	6192.03	7198.47	7750.29	7625.2	7207.42	6610.89
GO_PROTEIN_TARGETING	7716.03	7626.28	7621.1	7719.5	7431.02	7499.11	7097.68	8363.41	7712.55	8240.46	8328.49	7731.71	7522.52	8419.82	8530.13
GO_EXTRINSIC_APOPTOTIC_SIGNALING_PATHWAY	7714.65	7576.75	7759.21	7452.16	7239.11	7319.44	7293.75	8686.11	8253.92	7976.97	7948.07	7764.77	7559.18	7670.09	7837.83
GO_RESPONSE_TO_CYTOKINE	7714.06	7720.62	7648.06	7884.83	7788.96	7546.01	7498.92	8231.13	8055.93	7230.08	7666.87	8203.99	8047.28	7707.49	7294.62
GO_POSITIVE_REGULATION_OF_PROTEIN_AUTOPHOSPHORYLATION	7712.35	7852.81	7571.89	7413.51	8005.65	7287.7	6960.99	8653.47	8339.9	7238.95	7916.6	8110.76	7463.21	9019.7	6457.66
GO_RESPONSE_TO_AMINO_ACID_STARVATION	7709.96	7900.55	7863.52	7879.74	7732.61	7374.25	7072.06	7701.96	7836.03	7660.92	7310.78	7717.96	7613.99	8036.54	7356.72
GO_MEMBRANE_PROTEIN_ECTODOMAIN_PROTEOLYSIS	7708.89	7606.37	7534.55	7756.93	7430.04	7660.84	7391.66	8501.06	8323.37	7448.48	8293.31	7866.83	7550.3	7976.8	7765.34
GO_RIBOSOME_ASSEMBLY	7708.67	7862.42	7800.33	7378.98	7336.77	7082.49	6245.85	8480.46	7617.01	7875.68	8055.44	7514.18	7156.49	8896.27	8257.56
GO_REGULATION_OF_DEFENSE_RESPONSE_TO_VIRUS	7705.67	7796.2	7448.14	7650.83	7511.45	7760.51	7803.96	8350.46	8070.22	7484.99	7381	8498.11	8246.31	7346.06	7273.49
GO_POSITIVE_REGULATION_OF_FIBROBLAST_MIGRATION	7704.37	6038.44	5759.44	7970.47	6979.9	5493.64	5706.14	7438.27	8056.31	6683.16	8327.16	8344.2	8776.23	8368.43	8200.62
GO_CELLULAR_RESPONSE_TO_MECHANICAL_STIMULUS	7704.04	7718.63	7790.51	7945.71	7936.28	7624.73	7619.57	7689.46	7615.04	8112.88	7804.05	7326.69	7311.01	7361.8	7774.83
GO_CYTOKINE_PRODUCTION_INVOLVED_IN_INFLAMMATORY_RESPONSE	7703.35	7462.94	7707.79	7901.42	7555.03	8157.02	8243.1	7698.91	8023.66	6712.41	6725.81	7952.57	7954.51	7211.5	6475.83
GO_ESTABLISHMENT_OF_PROTEIN_LOCALIZATION_TO_ORGANELLE	7700.72	7734.2	7663.85	7780.77	7510.24	7467.39	7095.7	8119.03	7534.78	8063.08	7992.12	7667.24	7394.79	8356.54	8189.48
GO_APOPTOTIC_SIGNALING_PATHWAY	7699.1	7680.01	7745.77	7737.45	7489.3	7426.58	7360.48	8386.06	8047.11	7712.22	7840.21	7685.97	7556.79	7812.02	7636.09
GO_CYTOKINE_PRODUCTION_INVOLVED_IN_IMMUNE_RESPONSE	7695.03	7819.03	7464.4	8243.52	8013.88	7571.03	7541.63	7973.23	7918.95	6273.85	7136.13	8082.21	8113.12	7438.5	6885.03
GO_POSITIVE_REGULATION_OF_MITOPHAGY	7692.26	7512.23	7572.33	7656.08	7446.96	7687.44	7842.5	7451.44	7344.26	7697.09	8147.11	7752.18	7885.89	7845.62	8704.65
GO_TYPE_I_INTERFERON_BIOSYNTHETIC_PROCESS	7691.99	7550.34	7333.55	8473.43	8260.68	8047.32	7489.01	8383.5	7833.64	6745.77	7397.65	8451.46	8239.92	6415.47	6305.31
GO_L_ASCORBIC_ACID_METABOLIC_PROCESS	7689.81	7368.82	7728.61	6658.88	6770.71	7552.46	8278.43	7966.89	7333.64	8691.27	9519.79	8127.04	8294.17	7651.01	6266.88
GO_MATERNAL_PLACENTA_DEVELOPMENT	7689.53	7787.76	7826.95	7801.95	7678.69	7110.72	7036.68	8886.41	8889.11	7491.62	7700.36	6735.64	6536.66	7583.39	8432.1
GO_NEGATIVE_REGULATION_OF_AUTOPHAGOSOME_ASSEMBLY	7687.07	7610.99	8038.49	7727.92	7448.28	7580.36	7740.98	7814.5	7210.94	7986.48	7728.72	8200.52	7646.22	6913.19	7643.58
GO_MEMBRANE_PROTEIN_PROTEOLYSIS	7685.81	7478.96	7588.49	7783.13	7403.64	7505.9	7209.28	8346.95	8155.29	7325.08	8036.2	8037.06	7883.81	7882.36	7366.35
GO_VACUOLE_ORGANIZATION	7684.37	7763.57	7736.18	7923.89	7674.19	7962.1	8020.59	7694.54	7577.58	7397.17	7390.65	7417.11	7394.29	7879.81	7413.31
GO_POSITIVE_REGULATION_OF_AUTOPHAGOSOME_ASSEMBLY	7683.49	7426.98	7766.26	8325.44	8060.27	9286.44	9110.06	6906.36	7600.73	7161.96	6690.02	6642.01	7133.42	8119.45	8772.94
GO_POSITIVE_REGULATION_OF_PROTEIN_EXPORT_FROM_NUCLEUS	7682.33	7644.82	7676.9	8502.82	8267.85	7655.44	7123.42	7687.77	7878.82	6810.12	7052.12	8104.46	8002.6	7913.32	7415.5
GO_MRNA_EXPORT_FROM_NUCLEUS	7680.75	7832.97	7724.07	7791.94	7755.56	7895.56	7637.43	7548.07	7420.45	7277.52	7048.47	7749.03	7531.79	7897.79	7165.35
GO_ENDOPLASMIC_RETICULUM_MANNOSE_TRIMMING	7680.62	7792.72	8068.2	7825.74	7755.35	7518.47	7485.16	6803.77	7324.09	7015.21	7605.88	7762.3	7478.22	8286.04	7859.56
GO_GAMMA_DELTA_T_CELL_ACTIVATION	7679.97	7564.59	7484.45	7857.44	7365.1	8211.63	8550.97	7974.03	7755.68	7604.26	8328.02	7199.16	7229.05	6482.43	7935.99
GO_NEGATIVE_REGULATION_OF_ALPHA_BETA_T_CELL_ACTIVATION	7679.93	7005.76	6959.18	7989	7608.66	7751.2	7817.34	8182.74	8030.38	6523.62	7435.63	7977.56	7894.15	7166.13	7083.49
GO_NEGATIVE_REGULATION_OF_REACTIVE_OXYGEN_SPECIES_BIOSYNTHETIC_PROCESS	7679.76	7637.4	7852.03	8170.75	7865.79	7410.46	7162.3	7453.92	7349.93	6963.82	7740.61	7984.56	7722.12	8245.07	6970.31
GO_POSITIVE_REGULATION_OF_VACUOLE_ORGANIZATION	7678.34	7311.44	7398.67	7690.01	7666.67	8613.59	8556.07	8160.43	8046.71	7112.02	7113.73	7137.65	7309.73	8112.33	9251.97
GO_POSITIVE_REGULATION_OF_VIRAL_TRANSCRIPTION	7677.37	7568.56	7685.26	7669.47	7923.54	7991.04	7606.08	8110.1	8039.25	7224.96	7006.01	7782.73	7597.57	8041.82	7463.23
GO_LENS_FIBER_CELL_DIFFERENTIATION	7675.55	7422.06	7689.02	7782.62	7381.05	6525.37	7045.58	8463.66	8348.94	8423.6	8274.16	7662.07	7918.63	7593.59	6851.65
GO_CHOLESTEROL_STORAGE	7674.43	7279.89	7613.41	8077.68	8142.58	6863.43	7032.72	7483.02	8440.07	6594.48	7735.45	8311.52	8167.56	9678.4	5616.5
GO_N_ACETYLNEURAMINATE_METABOLIC_PROCESS	7673.52	7914.58	7943.57	7942.83	7596.16	7451.89	7153.48	7313.64	7550.15	8848.63	8038.56	7196.21	7401.85	8349.46	7750.89
GO_MULTI_ORGANISM_CELLULAR_PROCESS	7671.93	7502.22	6956.5	7660.39	7233.75	7709.99	7756.82	8558.62	8086.78	7683.47	7383.43	7859.45	7382.72	7415.26	7970.25
GO_POSITIVE_REGULATION_OF_PROTEIN_POLYMERIZATION	7669.87	7678.75	7650.41	7660.99	7199.31	7393.44	7464.4	8194.31	8115.37	8163.91	7936.65	7509.64	7557.75	7708.27	7940.06
GO_INCLUSION_BODY_ASSEMBLY	7669.47	7649.98	7491.15	8178.46	8125.04	7280.26	6786.64	8048.23	7688.97	8661.19	8068.03	7221.1	6921.8	7274.53	7884.51
GO_POSITIVE_REGULATION_OF_TRANSCRIPTION_FROM_RNA_POLYMERASE_II_PROMOTER_INVOLVED_IN_CELLULAR_RESPONSE_TO_CHEMICAL_STIMULUS	7668.08	7460.99	7676.54	7728.92	7651.21	7465.75	7145.12	8266.94	7659.61	8416.75	8612.77	7748.25	7622.19	7351.32	8111.64
GO_NUCLEOSIDE_SALVAGE	7662.71	6332.04	6593.13	6854.71	6426.13	8252.66	7912.29	8310.08	8508.27	7726.3	7803.37	7945.59	7472.26	7599.11	5382.22
GO_CYTOPLASMIC_PATTERN_RECOGNITION_RECEPTOR_SIGNALING_PATHWAY_IN_RESPONSE_TO_VIRUS	7662.59	7710.46	7037.74	7539.87	7358.04	7480	7632.69	8477.13	7692.49	8137.83	7900.13	8195.69	8008.73	7300.44	7541.8
GO_MACROPHAGE_CYTOKINE_PRODUCTION	7662.24	7858.07	7587.01	7827.31	8276.59	6717.7	7037.19	7373	7964.45	5724.82	6359.64	7737.47	8175.29	7754.88	5775.58
GO_VIRAL_LIFE_CYCLE	7662.11	7507.83	7253.85	7545.48	7396	7676.54	7647.68	8514.65	8155.18	7859.83	7825.85	8256.02	8070.08	7638.78	7164.37
GO_ALPHA_LINOLENIC_ACID_METABOLIC_PROCESS	7661.74	7253.52	7275.62	7904.48	7670.08	7866.94	7653.39	6723.98	7697.72	6135.64	6548.4	8098.69	8274.65	8427.74	7576.92
GO_MITOPHAGY	7661.47	7621.68	7734.33	7645.19	7666.79	7805.69	7600.33	7626.65	7626.92	7656.14	7609.62	7767.55	8008.97	7841.27	8065.27
GO_ENDOTHELIAL_CELL_CHEMOTAXIS	7658.93	8182.08	8071.74	7710.52	7328.02	6496.48	6439.04	7383.61	7313.31	6691.68	8008.04	7607.35	7742.99	7820.02	7909.4
GO_REGULATION_OF_PROTEIN_POLYUBIQUITINATION	7655.62	7629.28	7324.52	7675.55	7690.11	7763.6	7753.48	7635.69	7533.97	7459.28	6809.31	7781.99	8005.67	7041.95	7887
GO_PROTEIN_EXIT_FROM_ENDOPLASMIC_RETICULUM	7651.36	7581.15	7495.09	7765.86	7720.34	7643.84	7379.13	7658.89	7345.85	8321.16	8622.73	7602.5	7503.63	8187.17	7731.43
GO_OSTEOCLAST_DEVELOPMENT	7648.45	7644.46	7556.37	7959.6	7695.84	6898.76	7183.1	8415.62	8454.96	5975.76	6887.88	7730.45	7652.44	8346.17	6007.95
GO_CYTOKINE_MEDIATED_SIGNALING_PATHWAY	7648.23	7702.25	7573.88	7837.58	7744.64	7490.64	7466.85	8210.49	8070.11	7057.74	7548.74	8285.23	8120.28	7594.21	7154.64
GO_ALPHA_BETA_T_CELL_ACTIVATION	7646.54	7617.77	7449.81	8230.44	8007.82	7675.31	7517.52	8347.4	8249.58	5531.2	6587.67	8306.94	8135.43	7291.02	6643.96
GO_POSITIVE_REGULATION_OF_CHOLESTEROL_EFFLUX	7646.46	7673.74	7943.54	7342.41	7437.26	7619.17	8249.05	7731.12	8515.45	8157.85	8815.5	6641.76	7569.53	7579.25	6356.22
GO_PROTEIN_DEGLYCOSYLATION	7646.25	7542.2	7581.76	8178.24	7822.44	7667.32	7625.18	7116.45	7853.42	6563.97	6994.52	8005.86	7945.57	8203.56	6975.61
GO_RESPONSE_TO_EPIDERMAL_GROWTH_FACTOR	7645.4	7426.39	7180.91	7741.88	7082.76	7280.66	7388.87	8890.15	8634.7	9267.6	8488.94	7441.29	7548.91	7746.47	8558.98
GO_PROCESS_UTILIZING_AUTOPHAGIC_MECHANISM	7644.87	7667.47	7627.93	7741.49	7552.34	7674.09	7645.37	7740.22	7644.37	7686.72	7423.8	7463.62	7447.96	7833.56	7393.91
GO_T_CELL_MIGRATION	7642.61	7797.25	7587.82	8160.09	7905.35	7582.26	7436.85	8374.59	7692.18	5969.47	7176.39	8369	7890.16	7593.05	6617.51
GO_POSITIVE_REGULATION_OF_CYTOKINE_PRODUCTION	7641.41	7868.33	7691.2	7950.5	7809.74	7556.76	7556.15	7688.88	7746.66	6513.04	7009.46	7746.3	7593.93	7562.71	6760.12
GO_REGULATION_OF_MACROAUTOPHAGY	7640.68	7743.82	7737.82	7742.21	7667.32	7690.73	7838.09	7393.86	7414.6	7099.71	6962.98	7561.33	7614.04	7898.51	7188.18
GO_ACTIVATION_OF_CYSTEINE_TYPE_ENDOPEPTIDASE_ACTIVITY_INVOLVED_IN_APOPTOTIC_PROCESS	7638.74	7384.78	7497.22	7850.15	7496.49	7734.33	7565.26	8043.86	7970.76	7602.4	7249.19	7873.11	7874.89	7364.32	7675.09
GO_LEUKOCYTE_APOPTOTIC_PROCESS	7638.63	7614.06	7483.94	8077	7774.73	7663.19	7502.16	8395.93	8371.4	6515.11	7063.24	8335.33	8172.45	7536	6783.98
GO_INTERFERON_ALPHA_PRODUCTION	7638.28	7452.7	7357.85	8429.26	8291.48	7823.86	7321.7	8451.05	7843.32	5857.27	6629.66	7957.5	8174.23	6989.73	5801.1
GO_POSITIVE_REGULATION_OF_ACTIN_FILAMENT_POLYMERIZATION	7636.43	7662.29	7610.57	7606.91	7068.11	7168.21	7340.52	8070.15	8053.99	7705.39	7678.47	7508.35	7587.49	7766.09	7871.89
GO_NEGATIVE_REGULATION_OF_EXTRINSIC_APOPTOTIC_SIGNALING_PATHWAY	7634.95	7643.34	7750.24	7291.79	7124.16	7016.2	7068.41	8607.26	8382.2	7955.72	8117.94	7723.16	7517.73	7626.55	7486.72
GO_PH_REDUCTION	7634.8	8045.49	8286.62	7892.36	7993.74	7384.69	7705.79	7336.08	7563.82	6909.47	7157.05	7819.63	7502.98	8357.04	6116.77
GO_NUCLEAR_EXPORT	7634.64	7651.14	7565.41	7729.39	7618.14	7716.54	7342.4	7780.3	7565.93	7379.2	7198.86	7836.81	7658.77	7884.52	7048.74
GO_REGULATION_OF_TOLERANCE_INDUCTION	7632.92	7008.4	6707.2	7702.94	7295.75	8380.18	8033.23	9522.52	8696.43	4449.55	5932.85	8334.57	7757.44	7562.9	4476.84
GO_PROTON_TRANSMEMBRANE_TRANSPORT	7632.54	7766.56	7783.14	7764.87	7791.7	7422.17	7379.68	7785.04	7690.36	7574.73	7494.13	7490.63	6978.4	7972.38	7500.91
GO_NEGATIVE_REGULATION_OF_CALCIUM_ION_TRANSPORT_INTO_CYTOSOL	7632.38	7516.91	7635.57	7358.08	7765.12	8187.83	8023.98	7629.19	7446.8	6528.38	7179.29	8775.58	8329.01	8888.89	4633.54
GO_CELLULAR_DEFENSE_RESPONSE	7628.18	7690.17	7265.35	7956.36	7566.18	8330.84	8017.98	7990.74	7548.1	4894.45	5810.2	7968.28	7700.1	7060	5431.66
GO_REGULATION_OF_APOPTOTIC_SIGNALING_PATHWAY	7626.19	7570.5	7657.55	7613.87	7407.89	7184.63	7149.81	8188.1	7870.97	7839.4	7998.05	7552.82	7406.87	7813.65	7638.52
GO_POSITIVE_REGULATION_OF_TYPE_I_INTERFERON_MEDIATED_SIGNALING_PATHWAY	7625.72	7491.65	7671.4	7796.77	7580.04	7415.25	7807.39	7964.51	8437.41	5855.69	5845.24	8077.99	7862.8	7234.15	7297.25
GO_POSITIVE_REGULATION_OF_CHROMATIN_SILENCING	7623.11	8043.4	8055.75	7533.55	7606	7292.37	7192.61	7830.68	7640.22	7302.61	6607.51	7583.09	7775.55	7711.15	7914.28
GO_NEGATIVE_REGULATION_OF_BIOMINERALIZATION	7623	7085.41	7217.44	7496.74	7309.48	7223.21	7806.73	8899.2	8398.44	7831.8	7841.58	7277.95	6744.88	7749.26	8552.83
GO_REGULATION_OF_VACUOLE_ORGANIZATION	7620.47	7562.63	7688.86	7678.3	7515.62	8174.67	8229.88	7819.35	7246.42	7380.41	6937.93	7328.42	7289.31	7733.5	8040.26
GO_POSITIVE_REGULATION_OF_MICROTUBULE_POLYMERIZATION_OR_DEPOLYMERIZATION	7617.81	7197.15	7279.37	7553.5	7204.65	7828.92	7682.12	8134.17	7807.05	9102.53	8254.59	7091.02	7082.7	7343.72	7789.88
GO_REGULATION_OF_LAMELLIPODIUM_ORGANIZATION	7617.44	7490.42	7430.42	7782.77	7642.8	7302.79	7592.08	8165.91	8403.27	7321.8	7734	7527.95	7412.41	8211.32	7897.62
GO_REGULATION_OF_INTERLEUKIN_4_PRODUCTION	7609.44	7198.15	7029.26	7773.43	7735.89	7502.63	7104.41	8776.77	8293.41	4320.04	5862.01	7897.87	7864.9	7716.24	6215.04
GO_POSITIVE_REGULATION_OF_CHEMOTAXIS	7607.37	7775.93	7564.36	7831.43	7660.23	7223.18	7276.57	7894.27	7650.38	6358.45	7251.42	7803.31	7499.92	7859.74	7007.31
GO_POSITIVE_REGULATION_OF_PROTEIN_HOMODIMERIZATION_ACTIVITY	7606.97	7589.16	7052.43	7624.77	7809.89	7112.48	6922.34	8869.67	8134.94	9207.13	8890.7	7339.9	7187.51	7857.33	7372.04
GO_RECEPTOR_INTERNALIZATION	7606.8	7591.74	7589.26	7872.72	7846.09	7624.44	7773.4	7365.31	7343.51	7723.95	7621.85	7042.54	7076.04	7968.75	7416.99
GO_MONONUCLEAR_CELL_MIGRATION	7606.44	7330.45	7100.34	7581.57	7655.84	6902.2	7074.48	7631.31	7981.91	6575.69	7832.15	8381.19	7900.36	7748.01	6832.73
GO_PRODUCTION_OF_SMALL_RNA_INVOLVED_IN_GENE_SILENCING_BY_RNA	7606.43	7504.78	7358.89	7343.82	7275.2	7683.46	7716.98	7802.84	7570.46	7495.57	7642.39	7832.86	7791.69	7757.82	7521.24
GO_COPPER_ION_HOMEOSTASIS	7606.35	7488.44	7551.28	7555.47	7338.82	7497.67	7657.23	8071.07	8416.33	7887.52	7788.14	8836.22	8746.8	7312.42	6760.33
GO_PROTEIN_LIPID_COMPLEX_ASSEMBLY	7604.46	8208.99	8097.9	7852.54	7638.02	7582.41	7626.5	6579.84	7998.46	5136.02	6291.31	6731.2	7407.2	8181.48	7285.11
GO_POSITIVE_REGULATION_OF_PEPTIDASE_ACTIVITY	7603.96	7380.76	7518.37	7689.56	7432.61	7825.44	7803.04	7732.53	7874.87	7286.19	7505.92	7456.54	7407.02	7706.62	7737.16
GO_CDC42_PROTEIN_SIGNAL_TRANSDUCTION	7603.92	8345.61	8944.38	7618.27	7332.3	6683.43	7355.77	7639.08	8356.3	7497.52	8337.89	5067.54	6150.9	7589.57	8086.71
GO_LYTIC_VACUOLE_ORGANIZATION	7600.68	7694.31	7573.92	7692.67	7589.55	8177.4	8209.15	7611.82	7652.64	6926.91	7293.52	7391.07	7420.39	8257.53	7249.61
GO_CELLULAR_METABOLIC_COMPOUND_SALVAGE	7600.5	6651.4	7374.37	7514.77	7341.34	7849	7566.93	8164.94	8277.9	7407.11	8261.6	7783.28	7634.06	7760.08	6828.29
GO_REGULATION_OF_NATURAL_KILLER_CELL_ACTIVATION	7600.28	7941.49	7778.51	7908.36	7438.41	7518.71	7542.45	7711.44	7658.1	5728.22	5386.43	8180.28	7799.11	6846.1	5696.97
GO_POSITIVE_REGULATION_OF_INTERLEUKIN_4_PRODUCTION	7599.32	7084.86	6809.86	7904.6	7639.03	7805.43	7545.64	8484.03	8084.98	3610.24	5735.9	7889.87	7971.67	7559.6	6358.47
GO_FIBROBLAST_APOPTOTIC_PROCESS	7597.26	8049.02	7652.31	7408.57	8129.41	7382.15	6814.31	7871.35	7542.2	7325.68	7698.61	7945.48	7785.2	6494.44	6487.35
GO_POSITIVE_REGULATION_OF_CELLULAR_CATABOLIC_PROCESS	7596.4	7483.88	7411.6	7643.52	7549.28	7487.36	7457.46	7931.7	7862.68	7658.7	7530.03	7685.45	7687.14	7854.06	7465.69
GO_NEGATIVE_REGULATION_OF_DNA_TEMPLATED_TRANSCRIPTION_ELONGATION	7592.57	7272.03	6926.95	7677.85	7441.14	7840.28	7952.45	8256.44	8128.09	6982.8	7077.64	8421.91	8189.5	7507.29	6744.77
GO_RNA_EXPORT_FROM_NUCLEUS	7590.1	7693.73	7675.5	7644.5	7543.36	7700.18	7305.03	7636.84	7430.77	7321.75	7054.62	7683.11	7518.46	7987.84	7113.15
GO_POSITIVE_REGULATION_OF_INFLAMMATORY_RESPONSE	7589.98	7627.64	7500.78	8027.68	7907.76	7378.23	7513.92	8054.95	7988.87	6929.41	7814.83	7525.46	7552.33	8003.5	7467.15
GO_INTRINSIC_APOPTOTIC_SIGNALING_PATHWAY_IN_RESPONSE_TO_DNA_DAMAGE_BY_P53_CLASS_MEDIATOR	7588.9	7263.91	7405.77	7432.92	6982.45	6950.41	7070.54	8473.72	7767.83	8117.07	8195.04	7948.95	7850.6	7744.88	7402.85
GO_POSITIVE_REGULATION_OF_AXON_EXTENSION	7587.63	6955.75	7015.78	7184.31	6845.37	7622.02	7643.64	7850.14	8035.46	7730.76	8264.05	7175	7401.95	7553.24	8156.82
GO_REGULATION_OF_ADAPTIVE_IMMUNE_RESPONSE	7585.7	7495.94	7266.53	8200.06	7958.07	7621.57	7481.23	7605.99	7721.61	5920.17	6961.82	8204.09	8073.01	7565.4	6441.86
GO_POSITIVE_REGULATION_OF_CELLULAR_AMIDE_METABOLIC_PROCESS	7584.54	7582.31	7586.78	7577.02	7284.93	7365.65	7048.71	8141.16	7588.1	7599.1	7775.26	7621.65	7535.65	8018.56	7421.59
GO_SERTOLI_CELL_DEVELOPMENT	7583.1	7993.37	7785.73	7586.95	7687.65	6782.78	7231.92	6910.04	8222.02	7579.25	7621.69	6387.2	6205.08	7516.82	8573.7
GO_ORGANIC_CYCLIC_COMPOUND_CATABOLIC_PROCESS	7582.79	7561.81	7506.29	7542.83	7361.49	7492.24	7159.27	8215.06	7628.43	7581.72	7847.2	7901.81	7583.86	8248.9	8160.04
GO_REGULATION_OF_PROTEIN_EXPORT_FROM_NUCLEUS	7579.73	7280.24	7252.06	7891.33	7600.01	7559.45	7334.82	8182.5	7911.52	7229.55	7184.94	8102.74	8111.3	7667.93	6795.98
GO_BONE_RESORPTION	7579.56	7670	7651.07	7567.32	7229.34	7422.79	7403.59	7701.28	7781.02	5726.11	6842.97	7636.26	7668.02	7591.81	6891.3
GO_OVULATION	7573.44	8491.11	8353.22	8118.25	8105.41	7592.83	7554.05	7384.87	8341.14	6044.6	7436.9	6929.3	6323.99	7892.45	6516.12
GO_RESPONSE_TO_HYDROGEN_PEROXIDE	7570.21	7595.28	7449.03	7545.14	7384.76	7174.22	7175.11	8004.53	7913.48	7753.97	7977.87	7422.08	7372.37	7682.57	7720.47
GO_ADP_METABOLIC_PROCESS	7569.75	7469.67	7364.73	7729.42	7581.78	7787.62	7557.72	7597.72	7508.68	7440.52	7536.65	7630.7	7735.03	7792.83	6975.69
GO_POST_GOLGI_VESICLE_MEDIATED_TRANSPORT	7569.37	6977.66	7012.28	6892.13	6768.59	7544.03	7594.7	7846.23	7627.06	7848.4	7622.17	7641.79	7494	7678.06	7288.49
GO_PHYSIOLOGICAL_CARDIAC_MUSCLE_HYPERTROPHY	7568.76	7741.59	7353.09	7807.32	7526.9	7137.85	6946.91	7610.61	7965.72	7444.73	7806.22	6607.32	6622.66	7706.42	8277.12
GO_PROTEIN_INSERTION_INTO_MITOCHONDRIAL_MEMBRANE	7566.89	7094.1	7510.98	6966.4	6839.3	7168.64	6796.78	8380.56	8077.76	7622.79	8034.37	7883.16	7706.33	7761.19	6944.34
GO_POSITIVE_REGULATION_OF_PROTEIN_SUMOYLATION	7565.59	7179.57	7784.39	6957.9	7590.39	8254.5	7939.32	7575.97	7600.91	7386.15	6776.42	7555.21	7892.75	6605.76	7247.65
GO_POSITIVE_REGULATION_OF_CELLULAR_RESPONSE_TO_TRANSFORMING_GROWTH_FACTOR_BETA_STIMULUS	7564.92	7950.68	7532.72	7997.22	7645.89	7250.91	7041.77	7571.58	7558.26	7233.76	7432.58	7597.06	7403.32	7996.2	7816.96
GO_REGULATION_OF_T_HELPER_1_CELL_DIFFERENTIATION	7563.68	7127.51	6818.89	8176.41	8075.23	7572.61	7573.35	7429.62	8251.96	5391.86	7554.74	9843.31	9734.87	6404.86	6685.42
GO_NEGATIVE_REGULATION_OF_MULTI_ORGANISM_PROCESS	7562.03	7423.36	7164.9	7501.82	7365.39	7673.84	7730.66	8541.55	8368.44	6925.49	7622.24	8359.36	8290.49	7135.98	7377.83
GO_REGULATION_OF_RNA_BINDING	7556.83	7597.66	7988.94	7657.15	7107.95	7203.17	6827.62	7970.08	7185.82	7905.46	7736.79	7392.91	7469.76	8510.09	7515.99
GO_REGULATION_OF_PROTEIN_MODIFICATION_BY_SMALL_PROTEIN_CONJUGATION_OR_REMOVAL	7556.76	7571.61	7599.92	7671.07	7516.74	7364.62	7226.4	7981.11	7788.53	7611.89	7203.56	7785.16	7486.34	7541.92	7233.82
GO_REACTIVE_NITROGEN_SPECIES_METABOLIC_PROCESS	7556.72	7981.97	7943.54	7872.52	7544.92	7162.77	7291.04	8273.7	7858.4	7178.36	7795.74	7568.53	7363.26	7454.4	7274.01
GO_NEGATIVE_REGULATION_OF_RESPONSE_TO_BIOTIC_STIMULUS	7556.38	7657.05	7301.96	7455.71	7415.57	8003.77	8063.86	7931.88	7860.22	5975.93	7099.29	7730.89	7848.49	7271.14	7220.74
GO_REGULATION_OF_LAMELLIPODIUM_ASSEMBLY	7555.04	7270.92	7126.12	7712.42	7545.02	7565.05	7815.14	7725.45	7841.36	7250.89	7351.48	6880.34	6652.78	7897.66	8440.14
GO_FIBROBLAST_MIGRATION	7554.54	6897.54	6970.36	7658.44	7063.29	6559.25	6597.28	7943.38	8522.25	7450.64	7983.57	8373.97	8362.12	8497.35	7204.26
GO_MODIFICATION_BY_SYMBIONT_OF_HOST_MORPHOLOGY_OR_PHYSIOLOGY	7554.12	7381.6	7113.84	7591.5	7188.35	7614.23	7516.73	8412.67	8327.35	7390.18	7911.41	8180.67	8118.77	7512.14	6101.28
GO_STRESS_GRANULE_ASSEMBLY	7551.7	7653.82	7179.36	7574.77	7528.63	7419.02	7632.73	8318.79	7441.05	8591.15	8198.76	7092.87	6815.34	8226.66	7140.5
GO_POSITIVE_REGULATION_OF_STRIATED_MUSCLE_CELL_APOPTOTIC_PROCESS	7550.36	7752.65	7273.66	8136.64	7445.54	7655.17	7401.75	7838.1	7897.49	8253.6	8024.74	7133.5	6604.16	5642.62	5695.9
GO_MODULATION_BY_VIRUS_OF_HOST_CELLULAR_PROCESS	7549.83	6932.14	7047.26	7815.69	6971.05	7433.38	7431.25	8680.5	7666.29	8586.58	8441.91	7909.73	7729.8	7180.9	5862.19
GO_POSITIVE_REGULATION_OF_INTERLEUKIN_13_PRODUCTION	7549.33	7234.31	7086.55	7779.33	7890.65	7959.49	7890.26	7481.72	7527.8	5937.94	6738.49	7636.69	7570.85	8095.52	7494.13
GO_PLATELET_DERIVED_GROWTH_FACTOR_RECEPTOR_SIGNALING_PATHWAY	7546.95	7084.07	6991.41	7604.1	7512.83	7029.37	7033.02	8158.31	7969.24	7391.03	7805.09	7789.18	7815.69	7581.07	6949.73
GO_ACTIN_NUCLEATION	7546.54	7286.64	7140.92	7331.64	7008.03	7716.12	7623.6	7682.8	7720.98	7797.52	7444.09	7718.29	7640.1	7469.48	7376.76
GO_REGULATION_OF_HEMOPOIESIS	7541.46	7574.09	7486.53	7753.87	7507.69	7528.5	7432.67	8268.41	8127.49	6483.25	7069.18	8006.21	7894.72	7554.42	7040.03
GO_POSITIVE_REGULATION_OF_INTERLEUKIN_6_PRODUCTION	7540.75	7669.53	7545.75	7939.97	7739.21	7407.21	7700.3	7535.74	7475.87	6812.64	7720.15	7259.7	7092.18	7846.37	7419.53
GO_REGULATION_OF_PROTEIN_HOMOOLIGOMERIZATION	7538.91	6691.2	7285.23	6318.04	6090.34	7103.9	7792.6	9046.21	8534.07	9318.96	9467.99	8675.54	8673.87	6912.67	6805.41
GO_CYTOKINE_PRODUCTION	7536.43	7639.78	7483.05	7791.15	7621.2	7491.59	7516.78	7722.93	7740.35	6475.36	6916.11	7638.43	7556.08	7251.85	6631.13
GO_PHAGOSOME_MATURATION	7535.44	7756.28	7885.13	7431.59	7732.17	7639.29	7817.84	7258.42	7649.42	6545.81	7232.63	7202.89	7129.34	8645.53	6621.35
GO_REGULATION_OF_ESTABLISHMENT_OF_PROTEIN_LOCALIZATION_TO_MITOCHONDRION	7534.98	7464.38	7544.87	7534.04	7391.59	7661.31	7535.91	7934.27	7462.8	7415.03	7375.61	7600.05	7492.63	7773.27	7783.03
GO_POSITIVE_REGULATION_OF_TOR_SIGNALING	7534.48	8125.7	8023.79	7832.52	7340.17	7802.02	7713.04	7332.53	7688.42	6948.21	6728.08	7229.41	7380.54	7938.62	6673.82
GO_POSITIVE_REGULATION_OF_DEPHOSPHORYLATION	7532.72	7469.41	7596.02	7667.91	7362.89	7632.74	7357.77	7776.58	8157.53	6395.52	7221.76	8085.88	7961.86	6653.19	6843.64
GO_DETECTION_OF_MOLECULE_OF_BACTERIAL_ORIGIN	7532.67	7617.25	7614.43	8125.34	7937.63	8124.65	8330.05	7450.91	7131.96	6184.38	5484.71	6764.17	6596.72	7817.4	7218.65
GO_REGULATION_OF_INTRINSIC_APOPTOTIC_SIGNALING_PATHWAY_IN_RESPONSE_TO_DNA_DAMAGE	7529.43	7622.22	7765.09	7566.92	7524.52	7314.84	7230.21	7534.34	7288.14	8202.22	8582.52	7466.34	7437.68	7872.93	6924.21
GO_POSITIVE_REGULATION_OF_ERBB_SIGNALING_PATHWAY	7527.24	7550.86	7563.61	8113.24	7392.14	7710.36	7856.02	7503.61	7410.13	6624.98	7728.62	7263.03	7484.63	7176.3	8099.19
GO_POSITIVE_REGULATION_OF_MITOCHONDRION_ORGANIZATION	7524.87	7423.11	7683.66	7274.61	7113.77	7537.28	7417.77	8168.09	7825.16	7649.48	7527.03	7517.25	7372.66	7692.89	7522.71
GO_PROTEIN_LOCALIZATION_TO_PHAGOPHORE_ASSEMBLY_SITE	7524.46	6968.1	6693.54	6616.03	6034.3	7483.89	7657.87	7589.06	7588.97	8411.2	7944.48	7261.82	7077.05	7565.03	8326.61
GO_CELLULAR_RESPONSE_TO_OXIDISED_LOW_DENSITY_LIPOPROTEIN_PARTICLE_STIMULUS	7524.45	7201.03	6996.8	8156.42	7772.01	6869.51	7188.01	7276.88	7773.38	6060.69	7801.37	8019.15	7829.2	8196.19	6682.21
GO_PORE_COMPLEX_ASSEMBLY	7522.71	7607.57	7512.12	7240.55	7022.81	7828.99	7533.3	7857.64	7436.23	8343.04	7260.69	8052.46	7353.46	8285.86	7186.28
GO_POSITIVE_REGULATION_OF_I_KAPPAB_KINASE_NF_KAPPAB_SIGNALING	7522.42	7500.53	7170.01	7699.86	7505.78	7455.98	7560.81	8252.3	7976.79	7432.95	7883.86	7783.8	7539.06	7363.76	7314.46
GO_NEGATIVE_REGULATION_OF_OSTEOCLAST_DIFFERENTIATION	7521.22	7459.66	7184.9	7746.29	7412.03	7665.17	7582.78	8565.08	8205.21	7441.54	6986.27	8040.31	7978.41	7390.47	6668.6
GO_CHEMOKINE_PRODUCTION	7520.49	7669.24	7543.23	8039.12	7886.72	7166.91	7150.52	7497.75	7850.63	6780.59	7407.67	7611.2	7477.06	7703.62	6973.91
GO_REGULATION_OF_RECEPTOR_CATABOLIC_PROCESS	7518.22	6948.45	6803.5	7222.92	7281.58	8061.83	8142.21	8356.7	8085.78	7503.65	7532.78	7428.75	7461.56	8052.6	8159.9
GO_CYTOPLASMIC_SEQUESTERING_OF_TRANSCRIPTION_FACTOR	7513.87	7278.83	7813.46	7986.45	7832.08	7330.08	6835.88	8618.91	8056.32	7100.33	6827.65	7473.28	7283.77	7666.05	7554.46
GO_TERMINATION_OF_RNA_POLYMERASE_II_TRANSCRIPTION	7513.12	7552.68	7025.91	7112.5	7305.68	8088.85	7532.19	7661.93	7682.23	7259.11	7879.72	7582.53	7405.26	7494.05	6655.14
GO_POSITIVE_REGULATION_OF_MITOTIC_SISTER_CHROMATID_SEGREGATION	7511.42	8249.2	7966.03	7640.31	7617.71	7512.23	7437.01	7580.04	7430.65	6676.74	5692.23	7510.62	7282.31	7795.76	6824.77
GO_INTERLEUKIN_4_PRODUCTION	7511.24	7257.99	7078.29	7802.6	7763.56	7630.31	7325.14	8410.14	7910.41	4564.38	5938.99	7738.51	7714.97	7392.18	6097.45
GO_NAD_METABOLIC_PROCESS	7509.86	7288.52	7260.13	7924.72	7764.04	7959.01	7300.26	7323.56	7696.16	6987.08	7165.5	7791.87	8193.76	7805.87	6660.87
GO_LEUKOCYTE_CELL_CELL_ADHESION	7508.87	7549.87	7419.15	7808.12	7579.23	7467.87	7401.87	7844.2	7951.13	5589.05	6410.18	7850.66	7723.04	7192.63	6451.73
GO_CHRONIC_INFLAMMATORY_RESPONSE	7507.28	7814.52	7784.17	8098.55	7656.1	6833.68	6747.97	8324.19	7437.37	5245.77	5474.76	8178.61	7382.14	7577.19	5093.38
GO_IMMUNOGLOBULIN_SECRETION	7505.92	7510.36	7858.74	8212.24	7884.91	6426.69	5816.78	7501.48	8046.63	5758.59	7367.3	7998.14	8363.66	7433.48	6599.19
GO_HISTONE_MRNA_METABOLIC_PROCESS	7505.1	7522.09	7332.11	7023.55	7483.56	8279.3	7599.24	7737.74	7363.22	7819.75	7670.34	7721.82	7420.08	7452.87	7488.11
GO_REGULATION_OF_ARP2_3_COMPLEX_MEDIATED_ACTIN_NUCLEATION	7504.63	7276.1	7620.11	7310.34	6815.61	7732.26	7873.24	7644.21	7856.65	7451.25	7409.43	6882.13	7191.59	7558.02	7988.57
GO_REGULATION_OF_CELLULAR_CATABOLIC_PROCESS	7504.59	7390.09	7345.51	7498.54	7335.25	7493.04	7384.45	7940.58	7654.41	7560.19	7510.65	7574.15	7540.74	7817.99	7356.49
GO_RIBONUCLEOPROTEIN_COMPLEX_SUBUNIT_ORGANIZATION	7502.87	7537.94	7467.79	7259.17	7036.95	7282.2	6769.02	7975.95	7700.52	7626.92	7670.58	7365	7259.17	7901.17	7832.6
GO_CYTOSOLIC_TRANSPORT	7502.82	7507.02	7433.37	7599.74	7498.63	7763.55	7958.96	7448.39	7581.19	7266.04	7288.7	7442.21	7480.87	7860.83	7716.7
GO_REGULATION_OF_NEUROINFLAMMATORY_RESPONSE	7502.61	7549.31	7470.11	7855.31	7880.28	7181.74	6814.49	8204.91	8160.75	5963.52	7335.25	7633.73	7535.11	7224.13	6689.03
GO_CELLULAR_RESPONSE_TO_PEPTIDE_HORMONE_STIMULUS	7501.59	7538.76	7629.92	7714.27	7598.74	7373.33	7501.51	7515.57	7483.69	7229.62	7132.07	7187.03	7202.62	7513.52	7501.67
GO_NEGATIVE_REGULATION_OF_CD4_POSITIVE_ALPHA_BETA_T_CELL_ACTIVATION	7501.57	6737.92	6751.4	7688.18	7390.51	7612.63	7828.88	8227.53	7930.7	5682.96	6817.08	7843.09	7676.5	7114.14	6592.44
GO_NEGATIVE_REGULATION_OF_CALCIUM_MEDIATED_SIGNALING	7498.35	7684.61	7970.19	7330.06	7389.6	7439.48	7481.71	8352.42	8280.01	6947.01	7064.68	8057.6	7515	7873.04	6112.99
GO_POSITIVE_REGULATION_OF_PROTEOLYSIS	7497.29	7365.56	7478.54	7659.2	7440.57	7547.05	7516.04	7837.15	7838.9	7442.19	7476.65	7424.64	7324.88	7661.72	7640.04
GO_NEGATIVE_REGULATION_OF_PROTEASOMAL_UBIQUITIN_DEPENDENT_PROTEIN_CATABOLIC_PROCESS	7495.86	7431.13	7134.62	7915.58	7476.93	7440.6	7047.29	7783.27	7546.45	7514.78	8322.76	7192.09	7143.35	7836.67	7746.15
GO_REGULATION_OF_GLIAL_CELL_APOPTOTIC_PROCESS	7495.6	6772.76	7315.64	8068.68	7675.56	7058.28	7058.71	8896.15	9005.64	6371.56	6609.19	7915.73	8314.01	7830.11	4923.65
GO_GRANULOCYTE_DIFFERENTIATION	7495.55	7599.93	7558.62	7922.07	7610.6	7432.49	7623.17	7960.19	8353.48	5865.14	5488.52	6988.06	7129.26	7218.27	7194.89
GO_POSITIVE_REGULATION_BY_HOST_OF_VIRAL_TRANSCRIPTION	7495	7206.98	7523.6	7434.78	8129.39	7919.46	7466.35	8200.08	8112.74	6658.6	6103.11	7466.39	7315.85	8164.93	8035.85
GO_POSITIVE_REGULATION_OF_CELL_CELL_ADHESION	7491.57	7561.4	7421.73	7827.03	7603.37	7189.28	7081.56	8081.79	8032.44	5804.46	6608.89	7837.43	7712.57	7295.22	6304.78
GO_MONONUCLEAR_CELL_DIFFERENTIATION	7490.48	7067	6975.61	7426.53	7066.14	7442.18	7538.78	7983.84	7854.09	7036.44	7852.32	7861.49	7762.12	7559.91	7137.4
GO_CELLULAR_MACROMOLECULE_CATABOLIC_PROCESS	7490.15	7422.03	7340.77	7372.33	7236.18	7471.99	7182.42	8033.22	7529.3	7511.38	7674.44	7652.65	7430.51	7889.77	7508.32
GO_NEGATIVE_REGULATION_OF_SUBSTRATE_ADHESION_DEPENDENT_CELL_SPREADING	7489.95	7430.49	7005.56	7549.4	6958.4	6102.05	6551.21	9124.21	8693.88	9038.81	8320.4	7401.17	6880.17	7858.92	8710.6
GO_REGULATION_OF_VIRAL_TRANSCRIPTION	7488.76	7285.75	7359.25	7293.8	7426.74	7479.09	7141.23	8489.21	8247.8	7713.59	7272.59	7793	7647.45	7526.64	7498.43
GO_NEGATIVE_REGULATION_OF_TELOMERE_MAINTENANCE	7488.33	6884.54	7330.37	7688.17	7729.62	7500.62	7275.72	7765.39	7476.03	6743.14	6807.15	8061.14	7552.28	7574.78	6591.46
GO_REGULATION_OF_AUTOPHAGY	7487.29	7513.53	7539.16	7626.58	7414.36	7450.73	7514.44	7629.5	7577.57	7340.4	7067.7	7434.14	7461.05	7733.69	7267.82
GO_RECEPTOR_METABOLIC_PROCESS	7487.1	7466.77	7406.31	7667.66	7659.18	7585.02	7507.44	7729.25	7636.36	7202.81	7326.72	7283.77	7364.59	7627.48	7323.69
GO_POSITIVE_REGULATION_OF_CELL_MATRIX_ADHESION	7487	7610.08	7482.3	7491.7	7441.36	6859.24	7092.52	8711.01	8342.13	8503.95	7725.15	7415.56	7035.09	7542.31	6932.29
GO_REGULATION_OF_AUTOPHAGOSOME_MATURATION	7485.05	7576.03	6988.44	7465.41	7230.45	7504.68	7736.06	7138.38	7681.16	5641.24	6939.51	8379.4	8389.26	7514.03	5982.94
GO_ARF_PROTEIN_SIGNAL_TRANSDUCTION	7484.18	7045.1	7243.15	7476.84	7434.72	7516.9	7483.24	7809.29	7672.56	7898.23	7485.11	7016.64	7305.04	7860.59	7804.17
GO_POSITIVE_REGULATION_OF_PHOSPHATASE_ACTIVITY	7483.61	7539.28	7589.62	7502.62	7234.66	7464.6	7342.48	7993.07	8073.26	6967.43	7423.48	7909.11	7650.03	6410.39	6826.32
GO_NEGATIVE_REGULATION_OF_APOPTOTIC_SIGNALING_PATHWAY	7481.28	7449.96	7475.21	7487.35	7273.68	7000.54	7010.52	7960.38	7677.68	7777.47	7960.8	7421.85	7244.67	7655.4	7500.98
GO_REGULATION_OF_LEUKOCYTE_MEDIATED_IMMUNITY	7479.04	7459.92	7127.72	7842.67	7522.42	7648.35	7503.89	7466.06	7601.28	5203.74	6206.65	7560.87	7492.01	7053.35	6056.31
GO_MRNA_PROCESSING	7478.68	7513.19	7421.87	7444.18	7379.82	7600.72	7267.58	7715.99	7681.17	7415.61	7210.05	7537.75	7516.31	7587.13	7018.08
GO_NEGATIVE_REGULATION_OF_PROTEIN_MATURATION	7477.83	7419.2	7672.97	7704.95	7360.42	7350.91	7636.17	7597.74	7536.46	7149.35	7887.1	6821.32	6481.6	7984.47	7304.39
GO_INTERACTION_WITH_HOST	7477.02	7207.11	6906.1	7271.21	7125.04	7427.85	7414.93	8201.29	7910.23	7865.3	7900.09	7655.02	7526.19	7562.15	7206.71
GO_POSITIVE_REGULATION_OF_IMMUNE_EFFECTOR_PROCESS	7476.95	7629.89	7422.53	7929.06	7692.8	7411.45	7286.38	7519.06	7766.75	5600.82	6691.63	7681.99	7662.93	7434.84	6422.63
GO_INFLAMMATORY_RESPONSE_TO_ANTIGENIC_STIMULUS	7475.71	7590.65	7200.33	7869.63	7841.08	7613.3	7234.93	7677.16	8213.11	5325.82	6618.35	7261.92	7360.77	7671.3	6817.02
GO_INTERLEUKIN_6_MEDIATED_SIGNALING_PATHWAY	7474.87	8324.16	8539.36	7782.83	7898.54	8009.1	7392.45	6933.45	7557.29	5040.6	6263.07	7879.02	7057.36	6685.62	5872.14
GO_POSITIVE_REGULATION_OF_PROTEIN_LOCALIZATION_TO_CELL_SURFACE	7474.39	7498.64	7478.91	7773.81	7469.88	7048.01	6955.9	8660.49	7971.83	8895.67	8381.07	7238.66	7428.46	7292.52	6099.14
GO_CORTICOSTEROID_RECEPTOR_SIGNALING_PATHWAY	7469.17	7421.92	7087.25	7226.72	6982.95	8531.83	8364.31	7516.42	6998.01	7560.71	7325.05	7813.37	7643.63	7924.62	6606.93
GO_CELL_CELL_ADHESION_MEDIATED_BY_INTEGRIN	7469.13	7471.99	7802.86	7512.18	7032.06	7322.77	7214.56	9132.12	8486.94	3267.6	5266.66	9107.59	8242.17	7466.27	4604
GO_LOW_DENSITY_LIPOPROTEIN_RECEPTOR_PARTICLE_METABOLIC_PROCESS	7467.97	7077.44	6917.27	7160.27	7043.02	7841.71	7645.95	8156.96	7901.3	7068.12	7957.81	7289.99	7065.73	8444.45	7864.48
GO_RIG_I_SIGNALING_PATHWAY	7467.8	7696.15	7173.65	7578.75	7360.86	7495.26	7241.52	7892.68	7440.34	7757.52	7350.56	8332.51	8063.91	7411.39	6938.7
GO_RESPONSE_TO_MOLECULE_OF_BACTERIAL_ORIGIN	7467.73	7704.74	7651.9	7739.82	7555.72	7185.62	7353.16	7754.73	7695.12	6341.17	7139.57	7648.52	7379.74	7228.42	6849.81
GO_T_CELL_SELECTION	7466.55	7556.23	7233.92	7756.08	7403.33	7529.76	6869.94	8335.4	8494.9	2071.92	4017.5	8597.29	8527.25	7022.22	5138.27
GO_REGULATION_OF_RETROGRADE_PROTEIN_TRANSPORT_ER_TO_CYTOSOL	7464.47	7130.2	7005.35	7292.93	7469.27	7505.74	6967.6	7874.5	7448.87	7702.04	8547.25	7459.67	7718.86	7645.61	6967.54
GO_POSITIVE_REGULATION_OF_TRANSLATION	7463.27	7472.65	7523.58	7396.68	7082.94	7121.75	6712.39	8114.13	7421.43	7453.89	7600.81	7594	7426.94	8185.05	7503.7
GO_RUFFLE_ASSEMBLY	7463.25	6851.38	6648.36	7099.82	6931.77	7191.21	7646.77	8875.36	8370.29	7550.68	7891.18	7375.81	6842.07	7879.59	8610.12
GO_MRNA_3_END_PROCESSING	7462.88	7491.76	7434.01	7270.92	7418.62	7837.38	7251.27	7600.06	7540.57	7269.08	7239.76	7902.1	7734.18	7528.5	7272.05
GO_REGULATION_OF_DEFENSE_RESPONSE	7461.29	7514.61	7383.71	7543.38	7398.13	7486.77	7480.49	7832.11	7819	6482.88	7009.37	7534.97	7442.1	7270.01	6868.23
GO_REGULATION_OF_PROTEIN_MATURATION	7460.52	7470.28	7631.31	7819.41	7573.12	7138.02	7350.93	7755.72	7450.76	6832.3	7219.03	6984.78	6775.61	7959.81	7657.11
GO_MICROTUBULE_NUCLEATION	7456.86	7342.09	6793.08	7491.92	7384.05	7804.46	7540.19	7964.81	7446.14	8239.37	6884.94	7467.59	7127.92	7655.52	7244.63
GO_MYELOID_DENDRITIC_CELL_DIFFERENTIATION	7456.23	7840.3	7727.19	7799.1	7615.2	7604.34	7301.59	7254.69	7308.13	5813.62	6512.68	7628.71	7779.43	7102.76	5977.23
GO_RESPONSE_TO_GAMMA_RADIATION	7455.61	7408.66	7005.02	7502.57	7368	7060.86	6763.67	8161.33	7660.04	7160.64	7548.67	8246.71	7692.27	7637.41	6852.11
GO_KERATINOCYTE_MIGRATION	7453.2	6831.34	6422.8	6643.07	6591.38	7357.26	7944.11	7924.3	7740.01	8521.36	8205.17	6099.85	5948.95	7549.13	8302.96
GO_NEGATIVE_REGULATION_OF_SMOOTH_MUSCLE_CONTRACTION	7452.72	7696.49	7611.48	7529.24	7376.21	6979.76	7579.54	7126.54	6371.36	8866.53	8974.01	6368.01	5928.69	8290.73	7371.47
GO_NECROTIC_CELL_DEATH	7449.53	7397.94	7361.66	7967.86	7691.15	7535.7	7611.86	7945.16	7401.82	6555.75	7051.13	7902.64	7497.23	6969.71	7116.99
GO_REGULATION_OF_MACROPHAGE_DIFFERENTIATION	7447.56	7498.65	7445.78	7850.89	7433.15	6697.68	7376.59	7434.97	7843.34	6486.85	7973.7	7449.35	7607.44	7714.34	7307.46
GO_GOLGI_TO_ENDOSOME_TRANSPORT	7447.26	6239.87	5985.2	5791.26	5919.5	7410.03	7626.71	7896.25	7484.5	7808.89	7332.71	8208.75	7972.12	8278.74	5130.29
GO_FOAM_CELL_DIFFERENTIATION	7444.85	7572.35	7591.99	7586.24	7317.35	6853.11	6833.38	6830.64	8015.17	5613.76	7147.67	7790.09	7760.06	8653.88	6140.9
GO_CYTOKINE_SECRETION_INVOLVED_IN_IMMUNE_RESPONSE	7444.46	7967.91	7836.51	8661.31	8156.52	7141.47	7792.89	6668.04	7466.21	6748.17	7422.7	7082.72	7785.64	7070.11	7409.39
GO_HETEROTYPIC_CELL_CELL_ADHESION	7444.29	7678.87	7618.6	7759.1	7194.9	6891.7	7245.73	7769.41	7751.89	7452.26	7453.59	7056.9	6961.42	7436.32	6478.6
GO_REGULATION_OF_LEUKOCYTE_DIFFERENTIATION	7444.18	7443.24	7331.14	7766.74	7426.12	7445.12	7416.64	8017.28	8018.63	5728.89	6491.38	8039.63	7932.21	7492.69	6579.59
GO_POSITIVE_REGULATION_OF_DNA_BINDING_TRANSCRIPTION_FACTOR_ACTIVITY	7442.7	7602.14	7446.27	7823.3	7532.8	7439.14	7415.32	7747.65	7736.5	7370.57	7194.64	7546.48	7416.73	7265.01	7068.15
GO_PRODUCTION_OF_SIRNA_INVOLVED_IN_RNA_INTERFERENCE	7439.01	7659.97	7029.13	6709.05	6817.09	7597.38	8103.15	7385.15	6134.29	6936.47	7634.43	7848.33	7492.87	7671.3	5031.32
GO_VESICLE_ORGANIZATION	7437.57	7609.21	7534.89	7417.63	7415	7745.35	7749.4	7625.9	7345.81	7132.94	7096.25	7573.6	7434.8	7440.34	7315.91
GO_REGULATION_OF_DNA_TEMPLATED_TRANSCRIPTION_ELONGATION	7433.01	7395.49	7352.57	7585.56	7366.45	7588.42	7470.53	8153.11	7996.26	7064.48	6799.83	8221.26	8199.72	7355.88	7281.4
GO_MYOBLAST_FUSION	7433	7391.51	7391.12	7522.48	7214.31	7121.73	7086.12	7765.26	7673.46	7754.81	8705.49	7342.1	7474.5	7929.94	6338.51
GO_REGULATION_OF_REACTIVE_OXYGEN_SPECIES_METABOLIC_PROCESS	7432.77	7644.97	7450.19	7696.41	7615.87	7454.41	7400.64	7733.44	7701.16	6884.71	7317.27	7319.08	7168.24	7087.78	7415.35
GO_CELLULAR_CARBOHYDRATE_CATABOLIC_PROCESS	7432.3	6995.77	7107.58	7392.07	7559.27	8330.79	8184.87	7447.57	7316.21	7796.08	7910.04	7417.03	7338.94	7193.62	7598.16
GO_REGULATORY_T_CELL_DIFFERENTIATION	7431.62	7248.76	7127.7	7614.48	7207.21	7865.81	7701.15	8348.75	8663.95	3564.55	4881.65	8095.07	8257.13	6710.86	5668.76
GO_POSITIVE_REGULATION_OF_TRANSCRIPTION_OF_NOTCH_RECEPTOR_TARGET	7429.02	7126.72	6829.03	7275.29	7250.74	7849.82	8215.51	8161.82	8931.76	7297.86	7560.18	7247.96	6674.5	8478.72	8643.08
GO_T_CELL_CYTOKINE_PRODUCTION	7428.93	7053.79	6737.57	8029.79	7883.27	7490.87	7291.1	8142.62	7863.36	5834.47	7366.99	8553.1	8258.85	7172.9	6741.7
GO_POSITIVE_REGULATION_OF_AMYLOID_BETA_FORMATION	7426.87	7225.46	6962.7	7629.26	7506.84	7841.23	7665.02	7597.14	7659.72	6673.19	8172.78	7029.4	7346.9	5818.49	4831.34
GO_HEMATOPOIETIC_STEM_CELL_DIFFERENTIATION	7426.67	7205.83	7272.3	7237.25	7075.05	7506.45	7245.1	8586.78	8217.21	7236.89	7922.84	7933.18	7817.53	7726.09	7346.89
GO_MRNA_TRANSPORT	7426.11	7609.74	7384.25	7631.45	7540.62	7728.39	7427.46	7400.92	7299.23	7240.76	6862.46	7527.14	7424.75	7689.1	7090.89
GO_ACUTE_PHASE_RESPONSE	7424.9	7479.2	7625.87	8465.2	8112.94	7643.04	7590.19	7296.85	7249.37	7165.45	7652.19	6808.03	6075.58	7244.27	7370.61
GO_HISTONE_H4_K5_ACETYLATION	7422.71	7415.31	7510.82	7049.7	6848.35	7247.57	7430.1	7632.01	7149.49	7033.42	6420.55	7997.52	8432.81	8002.38	8039.48
GO_REGULATION_OF_RELEASE_OF_CYTOCHROME_C_FROM_MITOCHONDRIA	7422.16	7389.83	7335.23	7657.95	6886.32	7718.22	7454.49	7909.24	7665.61	8064.78	7888.82	7351.14	7381.43	7089.4	7292.46
GO_REGULATION_OF_ACTIN_CYTOSKELETON_REORGANIZATION	7421.77	6998.55	7201.9	7639.07	7394.6	6951.58	7411.38	7853.9	8083.15	7610.48	7432.17	7334.71	7248.07	7697.9	8294.37
GO_POSITIVE_REGULATION_OF_CATABOLIC_PROCESS	7419.68	7331.54	7225.24	7552.18	7434.82	7379.72	7370.04	7648.9	7628.85	7404.54	7330.53	7485.4	7521.04	7684.42	7385.35
GO_GLYCOSYL_COMPOUND_CATABOLIC_PROCESS	7418.32	6833.79	6958.9	7208.19	6914.38	7764.93	7501.35	8496.33	8219.59	7157.1	7365.61	8884.97	8145.88	7471.03	5154.95
GO_NEGATIVE_REGULATION_OF_ATP_METABOLIC_PROCESS	7417.61	7313.38	7459.51	8405.76	8191.62	7667.15	7092.73	7111.03	7200.16	6609.99	6477.04	7646.19	7895.38	7948.87	7375.71
GO_RUFFLE_ORGANIZATION	7415.14	6812.65	6676.75	7206.34	6897.55	7017.51	7342.47	8826.49	8431.8	7510.93	7989.44	7487.81	7038.13	7916.32	8624.02
GO_RESPONSE_TO_OXYGEN_LEVELS	7413.7	7265.73	7360.67	7553.2	7313.25	7173.66	7058.78	7668.09	7485.57	7466.73	7616.38	7475.7	7279.99	7533.84	7323.25
GO_PROTEIN_NITROSYLATION	7410.77	6661.17	7201.3	7346.8	6966.52	7432.66	7388.88	9026.11	8084.28	7858.35	8247.76	7133.25	7022.91	8108.85	7998.37
GO_ENTRAINMENT_OF_CIRCADIAN_CLOCK	7410.61	7550.8	7641.81	7256.69	6847.38	6478.52	6453.51	8141.32	8260.19	8248.54	7886.29	7090.05	7270.42	7876.25	6905.39
GO_PROTEIN_DEMANNOSYLATION	7408.15	7392.7	7479.82	7664.03	7080.97	7457.74	7215.56	6601.72	7423.6	6190.28	6428.43	7918.73	7634.14	7833.89	6711.02
GO_REGULATION_OF_LEUKOCYTE_MIGRATION	7407.06	7470.42	7273.98	7575.13	7384.86	7054.56	7200.62	7910.9	7828.21	6392.31	7136.86	7665.86	7429.26	7548.2	6838.73
GO_CELLULAR_RESPONSE_TO_INSULIN_STIMULUS	7406.43	7403.4	7543.45	7556.03	7506.31	7323.39	7409.47	7332.76	7389.28	7476.81	7340.35	7081.28	7143	7675.18	7595.38
GO_REGULATION_OF_CELLULAR_AMINE_METABOLIC_PROCESS	7404.54	7000.45	7232.79	7274.15	7039.97	7236.49	6956.68	7786.06	7403.81	7405.26	8011.71	7615.86	7537.57	7928.48	7845.92
GO_HISTONE_H4_DEACETYLATION	7401.55	6780.76	6073.23	7440.97	7472.26	6863.21	7605.72	7378.74	7424.36	8101.25	7674.16	7197.12	7216.37	7614.7	6853.98
GO_ER_ASSOCIATED_MISFOLDED_PROTEIN_CATABOLIC_PROCESS	7399.7	7554.61	7734.46	7105.46	7277.39	7185.12	7933.04	6909.44	7238.11	7222.08	7931.21	7450.52	7348.89	8082.83	7958.43
GO_CD4_POSITIVE_ALPHA_BETA_T_CELL_ACTIVATION	7399.23	7325.65	7238.23	7975.17	7837.06	7455.52	7342.95	8268.76	8161.27	5843.12	6760	8154.42	7960.85	7146.47	6711.22
GO_ENDOSOME_ORGANIZATION	7398.27	7467.38	7464.86	7344.27	7225.72	7464.95	7448.49	7557.72	7148.19	7060.8	7206.78	7310.72	7348.06	7615.77	7974.25
GO_NEGATIVE_REGULATION_OF_TRANSLATIONAL_INITIATION	7396.2	7630.95	7083.06	7805.51	7375.83	7416.58	7269.24	7368.9	6927.52	7451.45	7601.69	7209.05	7105.47	7843.34	8456.73
GO_REGULATION_OF_ENDOTHELIAL_CELL_CHEMOTAXIS	7393.73	8419.57	8156.45	7706.85	7267.84	6299.58	6011.75	7165.29	7021	5957.18	7440.54	7924.46	7810.95	7587.32	7346.92
GO_PROTEASOME_ASSEMBLY	7391.3	6662.1	6937.98	5554.51	7329.86	6938.93	6348.86	8076.39	7666.07	7977.62	7452.75	8071.48	8046.38	7647.24	5748.99
GO_POSITIVE_REGULATION_OF_MACROPHAGE_ACTIVATION	7389.33	7334.71	7276.94	8491.12	8211.11	7288.22	7400.81	7334.64	7377.84	5831.92	7893.38	7842.8	8008.04	8640.44	6980.18
GO_REGULATION_OF_LIPID_STORAGE	7388.78	7413.21	7733.21	8167.21	7860.63	6729.78	6914.15	6862.33	7818.19	7044.59	7102.14	7593.4	7364.36	8287.63	6415.26
GO_POSITIVE_REGULATION_OF_EXECUTION_PHASE_OF_APOPTOSIS	7387.64	7163.84	7611.44	7746.93	7071.91	7134.38	6303.22	7714.76	8422.16	5101.59	5717.59	7711	8251.76	7757.2	6995.68
GO_MULTI_ORGANISM_LOCALIZATION	7387.16	7436.56	7046.59	7466.08	7316.4	7387.35	7254.52	7601.5	6904.23	7621.98	6844.76	7895.12	7386.97	8022.85	6026.31
GO_NUCLEUS_ORGANIZATION	7385.48	7634.1	7607.89	7471.01	7391.74	7785.02	7532.83	7572.55	7379.23	7128.41	6761.17	7362.18	7202.72	7373.94	6732.34
GO_POSITIVE_REGULATION_OF_MONOCYTE_CHEMOTAXIS	7385.18	7388.96	6417.22	6429.96	6756.09	7381.4	8330.19	9249.32	9113.19	6379.19	8641.17	8729.59	8079.22	7066	7178.87
GO_RECEPTOR_BIOSYNTHETIC_PROCESS	7384.41	7957.6	7979.51	7346.34	7422.47	6235.68	5690.26	8435.44	8350.1	3954.55	5865.64	8230.97	8162.45	7031.98	5683.92
GO_REGULATION_OF_GTP_BINDING	7381.44	7577.87	7592.21	7372.09	7573.37	7513.06	7343.66	7620.54	7489.21	7247.84	7390.79	6966.99	7199.17	7366.5	6056.42
GO_IRON_ION_TRANSPORT	7378.92	7685.21	7493	7630.12	7617.5	7692.59	7641.26	7133.97	7356.56	6947.75	7239.03	6720.48	6491.07	7383.52	7374.32
GO_ENTRY_INTO_HOST	7378.07	7021.57	6662.13	7070.02	6886.18	7278.23	7379.89	8256.11	7977.26	7623.91	7874.91	7539.28	7376.25	7594.55	7274.85
GO_AEROBIC_RESPIRATION	7377.75	7098.63	7190.05	7319.84	6947.01	7534.09	7280	7923.67	7100.45	7663.55	8247.74	7521.21	7106.71	8322.84	7435.65
GO_MYELOID_CELL_DEVELOPMENT	7377.43	7435.28	7013.75	7697.59	7385.41	7416.19	7369.45	7793.71	7786.08	6074.44	6292.35	7172.84	7237.72	7605.63	7068.27
GO_HOMEOSTASIS_OF_NUMBER_OF_CELLS	7376.42	7506.78	7240.31	7565.71	7348.96	7412.03	7148.08	7801.35	7573.74	6372.72	6735.56	7403.88	7114.23	7486.34	6850.56
GO_NEGATIVE_REGULATION_OF_UBIQUITIN_DEPENDENT_PROTEIN_CATABOLIC_PROCESS	7374.1	7413.66	7334.54	7781.71	7474.45	7152.03	6775.06	7607.83	7212.19	7087.47	7776.96	7165.85	6980.79	7988.44	7514.01
GO_GLIAL_CELL_APOPTOTIC_PROCESS	7374	6978.78	7168.64	7863.83	7579.35	6915.16	6767.54	8181.06	8536.04	6593.23	6466.77	7741.47	8014.22	7584.32	5028.33
GO_NEGATIVE_REGULATION_OF_GENE_SILENCING	7372.17	7068.34	7118.79	7506.54	7234.58	7424.44	7430.17	6967.35	6876.91	6014	7319.89	7977.58	7915.16	7747.11	7668.44
GO_REGULATION_OF_NIK_NF_KAPPAB_SIGNALING	7369.25	7561.37	7579.01	7911.04	7791.32	7518.51	7512.75	7168.78	7112.25	6816.42	7272.02	7214.68	7122.58	7466.48	7210.66
GO_ACUTE_INFLAMMATORY_RESPONSE_TO_ANTIGENIC_STIMULUS	7369.23	7803.4	7905.57	7848.69	8234.77	7125.66	6773.29	7633.21	8275.7	5053.48	6504.45	7094.11	7283.4	7455.06	6261.33
GO_PROTEIN_LOCALIZATION_TO_NUCLEOPLASM	7368.49	7496.56	7302.19	7434.78	7140.29	6728.16	6597.36	7930.22	7086.07	7983.58	8560.41	7203.41	7116.61	8756.33	8689.36
GO_PYRIMIDINE_NUCLEOSIDE_CATABOLIC_PROCESS	7368.25	6947.15	7224.59	7306.21	6852.83	8771.68	8688.53	8985.63	9101.06	7430.28	6966.33	9538.26	8934.48	6400.62	4955.44
GO_POSITIVE_REGULATION_OF_GENE_EXPRESSION_EPIGENETIC	7366.55	7462.88	7411.84	7202.95	7235.29	7321.26	6938.2	7453.08	7473.46	6337.23	6792.23	7656.07	7824.84	7746.59	6830.98
GO_POSITIVE_REGULATION_OF_MACROAUTOPHAGY	7365.96	7325.95	7185.99	7512.01	7416.31	7405.97	7552.36	7161.28	7138.12	6693.59	6691.84	7509.79	7491.33	7543.45	7079.49
GO_MACROMOLECULE_CATABOLIC_PROCESS	7365.91	7290.04	7211.32	7286.39	7161.13	7360.53	7124.63	7860.65	7454.89	7371.29	7545.61	7480.09	7253.73	7758.13	7485.9
GO_OLIGOSACCHARIDE_METABOLIC_PROCESS	7363.91	7471.58	7310.65	7417.17	7118.13	7003.18	7011.94	7703	8036.49	6557.16	7766.39	6972.58	6725.76	7762.16	7599.73
GO_POSITIVE_REGULATION_OF_UBIQUITIN_DEPENDENT_PROTEIN_CATABOLIC_PROCESS	7363.45	7341.09	7250.01	7418.27	7366.34	7144.04	6964.46	7728.98	7361.72	7923.07	7457.32	7365.18	7160.42	7668.1	7328.5
GO_INSULIN_RECEPTOR_SIGNALING_PATHWAY	7363.14	7369.33	7549.38	7528.27	7462.73	7278.63	7274.76	7409.19	7356.95	7194.26	7018.85	6984.43	7085.68	7488.5	7375.11
GO_RETROGRADE_TRANSPORT_ENDOSOME_TO_PLASMA_MEMBRANE	7360.86	7348.92	7309.98	7423.43	7045.97	7232.81	7162.92	8198.59	7943.17	7372.8	6138.85	7505.15	7185.74	7759.14	7920.53
GO_RESPONSE_TO_COLD	7360.85	7328.69	7393	7646.43	7181.27	6384.99	6706.85	7453.54	6828.77	8483.87	7996.54	7489.5	7083.37	7586.22	7084.46
GO_REGULATION_OF_CATABOLIC_PROCESS	7360.83	7270.12	7189.51	7415.5	7250.28	7359.92	7261.82	7721.85	7472.7	7382.4	7361.75	7420.87	7350.62	7664.94	7245.95
GO_REGULATION_OF_MACROPHAGE_ACTIVATION	7360.35	7137.86	7024.49	7840.49	7461.73	7019.57	6903.11	7768.29	7613.29	6326.45	7336.65	7548.44	7490.9	7384.06	6179.99
GO_REGULATION_OF_LYMPHOCYTE_APOPTOTIC_PROCESS	7359.39	7280.12	7331.24	8042.01	7520.5	7387.54	7316.2	8065.42	7879.72	5887.13	6427.82	7781.51	7582.56	6948.18	5737.8
GO_POSITIVE_REGULATION_OF_COAGULATION	7358.73	7387.4	7330.06	7841.04	7722.32	6895.3	7239.32	7457.38	7634.59	7531.01	7034.38	6886.37	6928.35	8242.71	6988.94
GO_NEGATIVE_REGULATION_OF_PROTEIN_TYROSINE_KINASE_ACTIVITY	7355.63	6979.16	7336.06	6685.71	6656.31	7413.07	7375.21	8274.5	7790.15	7727.72	7330.33	7047.77	7522.08	6495.82	7887.55
GO_NEGATIVE_REGULATION_OF_MAP_KINASE_ACTIVITY	7354.98	7528.99	7379.8	7396.8	7100.4	6930.86	7007.89	8125.17	7764.13	7748.89	7330.15	6997.62	6761.27	7127.77	7780.08
GO_RIBOSOMAL_LARGE_SUBUNIT_BIOGENESIS	7354.93	7454.29	7534.62	7255.56	6906.47	6406.56	5367.87	8383.66	7083.5	8100.28	7472.22	6996.1	6836.12	8849.86	7800.34
GO_CELLULAR_RESPONSE_TO_HEAT	7354.12	7469.49	7273.43	7713.15	7608.75	6937.78	6735.51	7477.71	7039.97	7569.36	7306.88	7401.35	7115.91	7576.78	6957.79
GO_SKELETAL_MUSCLE_TISSUE_REGENERATION	7352.36	7363.97	7340.76	7269.58	7077.5	7683.97	7155.39	7445.15	7413.05	7449.39	7949.17	6697.86	6990.64	7383.41	7049.26
GO_ESTABLISHMENT_OF_RNA_LOCALIZATION	7350.28	7396.16	7198.43	7395.88	7335.46	7504.53	7094.56	7365.09	7255.81	7173.77	6754.87	7480.73	7373.58	7638.98	6874.93
GO_NEGATIVE_REGULATION_OF_UBIQUITIN_PROTEIN_TRANSFERASE_ACTIVITY	7350.09	7533.17	7797.55	7506.81	7165.59	7302.16	6561.77	7694.71	6706.63	7212.86	7166.03	7676.95	6744.76	8158.19	7398.02
GO_POSITIVE_REGULATION_OF_PROTEIN_CATABOLIC_PROCESS	7347.93	7182.65	7114.34	7378.58	7317.29	7285.22	7161.44	7575.96	7433	7563.5	7508.22	7299.91	7201.84	7652.33	7456.33
GO_NATURAL_KILLER_CELL_CHEMOTAXIS	7347.55	8085.08	7177.67	7031.65	7775.51	7364.66	7330.45	8792.04	8016.07	3181.52	5823.42	9624.57	8979.65	7252.81	4668.65
GO_REGULATION_OF_LYMPHOCYTE_CHEMOTAXIS	7346.93	7948.21	7427.52	7268.6	7638.67	7084.12	6896.39	8615.61	7425.26	4175.05	6299.54	9194.17	8029.24	6783.97	5270.28
GO_REGULATION_OF_PROTEIN_OLIGOMERIZATION	7344.87	7256.09	7591.74	7396.25	7157.2	7016.84	7293.49	8136.04	7406.1	6985.32	7553.61	8047.96	7956.01	7094.34	6392.51
GO_REGULATION_OF_MITOCHONDRION_ORGANIZATION	7341.95	7241.05	7415.13	7227.72	7005.6	7421.31	7221.76	7854.75	7600.07	7701.97	7597.25	7268.77	7181.05	7612.96	7162.9
GO_ANTIGEN_PROCESSING_AND_PRESENTATION_OF_ENDOGENOUS_ANTIGEN	7340.69	7348.44	7181.72	8776.28	8278.11	7150.18	7332.93	6439.06	6889.58	5054.65	6379.4	7564.68	7437.31	8797.19	7873.22
GO_INTERFERON_GAMMA_SECRETION	7339.19	7355.79	6998.3	7478.07	7418.18	7265.81	6865.94	8930.03	8799.06	4900.24	4582.82	7565.48	7466.52	7322.59	6447.68
GO_CELLULAR_IRON_ION_HOMEOSTASIS	7338.44	7601.25	7369.93	7591.26	7378.07	7449.02	7367.51	6881.43	7309.38	6702.79	7478.26	6979.69	6591.31	7266.29	7223.01
GO_CYTOPLASMIC_SEQUESTERING_OF_PROTEIN	7335.01	6969.58	7328.95	7808.7	7477.01	6983.95	6646.93	8569.58	8040.68	7295.45	7346.58	7224.3	7165.29	7341.06	7394.78
GO_POSITIVE_REGULATION_OF_NUCLEOCYTOPLASMIC_TRANSPORT	7334.33	7611.38	7383.35	7852.98	7524.78	7337.76	7133.19	7565.44	7569.66	7009.49	6949.11	7269.37	7011.35	7330.9	6887.71
GO_RESPONSE_TO_THYROID_HORMONE	7330.27	7577.78	7334.39	7230.2	6853.86	6924.46	6944.17	8358.58	8139.7	7622	8090.35	7078.63	7150.66	8336.5	7326.14
GO_POSITIVE_REGULATION_OF_TELOMERASE_RNA_LOCALIZATION_TO_CAJAL_BODY	7330.06	7424.21	7196.37	7470.73	7235.9	6997.76	6711.73	7924.83	6684.3	8679.15	8870.34	7023.76	6286.63	7823.39	7846.64
GO_PHOSPHATE_ION_TRANSPORT	7327.96	7238.62	7406.36	7209.38	7059.45	7209.02	6897.59	8682.31	8836.72	7866.65	8104.52	6856.63	7249.56	7490.05	8796.17
GO_NEGATIVE_REGULATION_OF_TUMOR_NECROSIS_FACTOR_SUPERFAMILY_CYTOKINE_PRODUCTION	7327.34	7291.68	7363	7994.22	7839.42	7465.56	7261.38	7224.46	7564.49	5038.84	6585.03	7404.68	7509.85	6367.17	5874.47
GO_PRE_MIRNA_PROCESSING	7326.54	7512.51	6753.4	6673.11	6961.44	8403.2	8224.36	7759.46	7253.2	8277.9	7371.71	7617.86	7281.37	7026.93	5700.8
GO_POSITIVE_REGULATION_OF_FATTY_ACID_BIOSYNTHETIC_PROCESS	7324.97	7575.4	7789.54	7904.24	7986.35	6776.84	6982.46	6651.24	7498.66	7151.29	7705.97	7016.14	6955.16	7688.37	7132.63
GO_BONE_CELL_DEVELOPMENT	7324.18	7354.99	6916.23	7686.46	7293.36	7094.31	7021.57	8109.25	8031.57	5393.12	6353.16	7375.1	7604.98	7805.1	7006.04
GO_INNATE_IMMUNE_RESPONSE	7322.4	7469.56	7175.26	7449.86	7284.66	7360.15	7266.22	7987.99	7745.95	6094.35	6899.81	8197.02	8028.86	7152.02	6868.93
GO_NEGATIVE_REGULATION_OF_NIK_NF_KAPPAB_SIGNALING	7321.34	7325.6	7317.08	8172.67	7902.75	7924.95	8008.06	6816.28	6829.02	6413.12	6694.76	6670.06	6657.17	7842.91	7678.44
GO_POSITIVE_REGULATION_OF_ADAPTIVE_IMMUNE_RESPONSE	7320.34	7412.24	7229.09	8174.65	7891.09	6997.3	6839.26	7224.96	7411.59	5040.59	6584.82	8051.21	7998.26	8034.73	6081.26
GO_HEMOGLOBIN_METABOLIC_PROCESS	7319.03	8206.71	7640.07	7314.51	7752.59	6608.34	6919.67	6705.17	7323.55	6739.74	7236.94	7919.61	7208.55	7966.13	7418.8
GO_POSITIVE_REGULATION_OF_VIRAL_RELEASE_FROM_HOST_CELL	7318.96	7383.17	7447.2	7181.45	7379.36	7104.34	7014.33	7258.57	6696.65	8955.07	7659.14	5870.87	6104.28	7740.38	8323.15
GO_POSITIVE_REGULATION_OF_MONOOXYGENASE_ACTIVITY	7318.57	7033.75	7540.49	7250.55	7138.97	6587.38	6915.57	7615.02	7476.97	5878.29	7585.05	7429.25	7227.64	7386.58	7824.91
GO_CELLULAR_RESPONSE_TO_EXOGENOUS_DSRNA	7318.28	6666.48	6404.8	7392.35	7244.21	6452.46	6425.18	8452.86	8652.41	7595.53	8930.32	8848.03	8897.23	5868.02	6492.2
GO_RESPONSE_TO_FLUID_SHEAR_STRESS	7318.02	7550	7586.98	7236.64	6967.33	6216.23	6750.12	7782.57	7738.54	6245.56	6292.86	7399.4	7400.92	7643.36	7202.44
GO_POSITIVE_REGULATION_OF_GLIAL_CELL_PROLIFERATION	7314.37	7379.18	6877.15	7766.33	7985.7	6598.65	6357.12	7249.55	7640.01	5742.77	6924.43	8185.36	7612.99	7683.95	5854.62
GO_SKELETAL_MUSCLE_SATELLITE_CELL_PROLIFERATION	7314.17	7153.42	7007.98	7722.93	7535.94	6917.32	6965.64	7474.93	7932.09	9297.84	9091.02	6875.24	6753.42	6988.92	8916.19
GO_NEGATIVE_REGULATION_OF_CATABOLIC_PROCESS	7313.87	7142.81	7107.55	7469.92	7315.84	7311.9	7198.48	7594.31	7336.08	7301.46	7442.09	7155.41	7124.84	7550.2	7351.82
GO_PROTEIN_HEXAMERIZATION	7313.7	7526.87	7597.25	6579.43	6762.16	6542.41	5752.2	7319.57	7073.24	7642.14	7383.51	7575.99	7491.13	7307.83	6167.3
GO_HYALURONAN_CATABOLIC_PROCESS	7309.67	7341.91	7306.26	7586.05	7313.07	8213.79	7940.94	6814.22	7028.35	5875.07	6562.16	6272.16	6247.18	8405.55	7460.47
GO_NEGATIVE_REGULATION_OF_HEMOPOIESIS	7309.13	7285.85	7217.12	7674.02	7322.85	7247.98	7319.32	8372.19	8217.48	6261.61	6914.9	8101.13	8063.93	7298.93	6869.45
GO_REGULATION_OF_PROTEIN_LOCALIZATION_TO_PLASMA_MEMBRANE	7309.06	7259.93	7211.79	7249.88	6964.14	7192.08	7341.5	8024.31	8092.16	7276.63	7639.47	7245.24	7388.4	7892.26	7849.12
GO_MAMMARY_GLAND_EPITHELIAL_CELL_PROLIFERATION	7308.82	7483.6	7400.75	7083.12	6546.29	6576.46	6264.92	8067.09	8334.18	6042.86	6748.12	8039.49	7898.44	7502.49	7216.89
GO_REGULATION_OF_RESPONSE_TO_TUMOR_CELL	7302.19	7142.39	7171.86	7819.93	6941.25	7690.1	6601.53	8489.97	7285.02	6283.89	7665.32	9078.69	9217.23	7319.36	3813.13
GO_PEPTIDYL_PROLINE_HYDROXYLATION	7301.41	7732.23	8662.14	8578.69	7724.92	7380.51	7246.41	6647.94	7280.27	7252.66	8316.88	6946.34	7322.55	7230.38	5464.56
GO_REGULATION_OF_OXIDATIVE_STRESS_INDUCED_CELL_DEATH	7300.13	7356.43	7364.97	7364.31	7121.9	6999.12	6781.65	7384.01	7236.78	7243.83	7692.39	7066.24	6785.7	7915.34	7688.81
GO_SPLICEOSOMAL_COMPLEX_ASSEMBLY	7298.46	7321.53	7322.54	7305.9	6944.91	7593.23	7345.95	7496.32	7430.17	7028.94	7055.35	7291.02	7286.37	7031.7	7145.75
GO_RETROGRADE_TRANSPORT_ENDOSOME_TO_GOLGI	7297.11	7276.21	7188.56	7606.38	7405.5	7378.36	7682.59	6834.1	7154.35	6698.75	6833.29	7282.03	7312.2	7357.26	7720.72
GO_ACTIN_FILAMENT_POLYMERIZATION	7296.4	7287.37	7052.31	7277.98	6882.19	7179.66	7305.44	7723.83	7572.13	7486.21	7431.56	7088.82	7004.97	7431.09	7712.99
GO_INACTIVATION_OF_MAPK_ACTIVITY	7295.77	7612.32	7450.39	7382.44	7225.44	6013.09	5799.48	8309.79	7781.16	7156.09	7060.71	7899.46	7366.1	6890.61	6721.51
GO_POSITIVE_REGULATION_OF_INTRACELLULAR_PROTEIN_TRANSPORT	7293.79	7093.96	7197.12	7463.49	7076.39	7430.85	7252	7644.86	7505.93	7335.57	7007.98	7191.96	7067.03	7339.5	7434.23
GO_PURINE_CONTAINING_COMPOUND_SALVAGE	7293.61	6497.11	7140.06	7554.94	8036.25	6901.01	6075.59	7483.63	7510.87	6776.45	7939.21	7417.83	7169.39	7715.81	6511.45
GO_NEGATIVE_REGULATION_OF_CELLULAR_CATABOLIC_PROCESS	7290.98	7010.38	7013.37	7343.2	7155.24	7313.53	7205.15	7683.23	7356.95	7268.43	7349.17	7149.75	7157.14	7558.19	7372.47
GO_REGULATION_OF_INTRINSIC_APOPTOTIC_SIGNALING_PATHWAY_BY_P53_CLASS_MEDIATOR	7288.49	7291.82	7206.94	7564.3	7236.11	6667.83	6663.42	7462.78	6615.69	7922.49	8604.23	7285.15	7006.72	8293.39	7958.12
GO_SKELETAL_MUSCLE_CELL_PROLIFERATION	7285.06	7137.31	6941.49	7653.59	7488.77	6869.74	6931.62	7385.35	7924.51	9078.3	8929.93	6894.41	6780.69	7184.77	8743.79
GO_PROTEIN_MODIFICATION_BY_SMALL_PROTEIN_REMOVAL	7284.33	7092.24	6955.27	6950.69	6845.7	7307.14	7197.16	7704.83	7261.52	7388.61	7519.34	7627.22	7334.07	7362.62	6845.25
GO_POSITIVE_REGULATION_OF_CHROMATIN_ORGANIZATION	7283.74	7255.76	7240.74	7579.48	7507.32	7571.12	7311.71	7582.73	7509.78	7074.21	6626.32	7018.75	7123.56	7165.74	7504.97
GO_POSITIVE_REGULATION_OF_HISTONE_H3_K4_METHYLATION	7282.8	6751.83	6513.57	7016.51	7193.41	7651.08	7146.98	7884.88	8546.67	7136.67	7372.18	7674.42	7623.42	7616.64	4560.99
GO_PROSTANOID_BIOSYNTHETIC_PROCESS	7279.55	7663.57	7648.31	8379.14	7983.16	6196.45	6271.31	7251.1	7308	6797.12	8111.02	6378.05	6430.2	8089.52	6181.26
GO_NEGATIVE_REGULATION_OF_RELEASE_OF_CYTOCHROME_C_FROM_MITOCHONDRIA	7279.12	6657.01	6690.68	7285.71	6445.23	8036	7714.19	7176.86	7238.77	7647	7666.11	6939.25	7384.43	7272.53	7390.42
GO_ANAPHASE_PROMOTING_COMPLEX_DEPENDENT_CATABOLIC_PROCESS	7278.4	7276.39	7408.65	7216.38	6963.28	7671.14	7243.44	8571.79	7551.5	7122.97	7260.47	8350.68	7777.79	7280.42	6569.73
GO_LIPOXYGENASE_PATHWAY	7276.87	7199.15	7170.7	8080.83	7294.44	7338.46	7069.34	7935.93	8196.47	7259.31	8053.94	6641.38	5297.1	8095.26	6035.79
GO_REGULATION_OF_PROTEIN_POLYMERIZATION	7276.58	7275.69	7037.27	7277.47	6992.03	7186.81	7200.9	7803.33	7657.74	7542.07	7370.66	7104.97	7077.83	7308.49	7698.63
GO_REGULATION_OF_POSTTRANSCRIPTIONAL_GENE_SILENCING	7276.42	7331.37	7181.35	7321.02	7317.43	7503.5	7406.06	7260.84	6906.79	7215.87	6866.16	7291.99	7032.86	7601.51	6953.38
GO_ASTROCYTE_DEVELOPMENT	7275.91	7752.25	7561.45	7680.33	7936.91	7242.6	6852.31	7433.09	7309.23	6626.5	7807.08	7024.3	6998.57	7055.2	6810.58
GO_POSITIVE_REGULATION_OF_MUSCLE_CELL_APOPTOTIC_PROCESS	7274.85	7921.59	8143.95	7564.08	7501.53	7702.39	7228.25	6932.75	6907.7	6825.61	6489.47	7354.88	7321.45	6072.38	6462.11
GO_SIGNAL_PEPTIDE_PROCESSING	7272.07	7623.23	7888.96	7046.79	7449.43	7208.82	6313.95	7028.63	7312.93	6775.7	7231.21	8165.24	7605.15	8484.37	4639.67
GO_HISTONE_DEACETYLATION	7271.71	7132.86	7082.71	7484.08	7259.52	7428.59	7814.9	7353.16	7283.9	7073.08	6849.75	7085.71	7094.54	7511.03	8111.95
GO_T_CELL_HOMEOSTASIS	7271.45	7189.73	7202.01	7568.57	7295.35	7816.3	7799.87	8048.83	7568.86	5551.15	6546.78	7770.53	7191.49	7247.55	7080.22
GO_REGULATION_OF_PROTEASOMAL_UBIQUITIN_DEPENDENT_PROTEIN_CATABOLIC_PROCESS	7266.92	7380.85	7237.75	7527.8	7215.05	7216.67	6916.43	7646.99	7265.49	7619.88	7476.82	7268.35	7012.8	7692.42	7236.36
GO_POSITIVE_REGULATION_OF_LIPID_STORAGE	7266.23	7212.87	7469.52	8271.89	7820.1	6685.44	6992.2	6208.29	7319.59	7930.39	7407.37	7142.56	7134.05	8138.63	6038.99
GO_REGULATION_OF_INFLAMMATORY_RESPONSE_TO_ANTIGENIC_STIMULUS	7265.06	7527.84	6845.42	7875.84	7588.79	7043.59	6735.79	7571.97	7959.62	4976.57	6825.45	7189.96	7340.16	7849.08	7107.26
GO_POSITIVE_REGULATION_OF_CELL_JUNCTION_ASSEMBLY	7264.64	7402.34	7183.88	7301.06	7016.32	6579.76	7161.66	8996.27	8224.75	9439.56	8233.88	6422.14	6126.75	7228.22	7309.47
GO_REGULATION_OF_CELL_SHAPE	7264.54	7085.85	7013.92	7360.5	6884.98	6927.99	7107.38	7631.74	7920.98	7412.58	7760.29	7085.24	7168.59	7759.71	7584.5
GO_NEGATIVE_REGULATION_OF_GLYCOPROTEIN_METABOLIC_PROCESS	7264.26	6444.48	6408.83	7971.07	6703.76	7886.41	7405.19	7550.83	7613.8	6520.97	7272.18	7307.29	6897.92	5471.24	7256.34
GO_PROTEIN_LOCALIZATION_TO_MEMBRANE	7264.16	7216.04	7228.98	7251.58	6980.29	7108.21	6941.53	8156.54	7720.17	7708.35	7892.19	7276.73	7092.36	7908.47	8042.72
GO_DEADENYLATION_DEPENDENT_DECAPPING_OF_NUCLEAR_TRANSCRIBED_MRNA	7262.39	6757.72	6551.26	7267.95	6739.1	7425.37	7159.6	8461.4	8142.75	7256.83	7567.62	8437.01	8204.48	5890.45	5278.84
GO_REGULATION_OF_INTEGRIN_ACTIVATION	7261.86	7472.41	7474.16	7438.77	7180.53	5580.67	5841.68	7683.98	7092.36	5340.44	6365.77	8369.84	8403.18	7343.18	6197.85
GO_POSITIVE_REGULATION_OF_AMYLOID_PRECURSOR_PROTEIN_CATABOLIC_PROCESS	7258.69	7074.68	7021.1	7501.63	7545.21	8070.62	7625.21	7398.29	7236.69	6431.46	7593.99	7098.86	7280.69	6117.53	5304.52
GO_RNA_POLYADENYLATION	7257.81	7134.06	6783.28	7096.75	7122.94	7777.95	6936.27	7398.04	7678.64	7251.71	7226.94	7642.99	7662.2	7263.91	7419.34
GO_REGULATION_OF_T_CELL_CYTOKINE_PRODUCTION	7257.8	7017.57	6651.92	8116.41	7970.32	7186.87	6945.27	7977.68	7996.49	5010.02	6820.07	8237.9	7875.05	7328.72	6615.66
GO_REGULATION_OF_TELOMERE_MAINTENANCE	7257.3	7100.18	7154.64	7261.71	7302.62	7475.48	7252.89	7796.53	7138.2	7024.24	6649.81	7606.66	7287.02	7270.45	6569.31
GO_PROTEIN_CATABOLIC_PROCESS_IN_THE_VACUOLE	7252.87	6981.63	7122.18	7076.35	6827.73	7675.34	7536.09	8108.27	7383.55	7533.25	7068.02	7116.77	7693.14	8284.64	5343.13
GO_T_CELL_DIFFERENTIATION	7251.25	7348.78	7135.29	7612.44	7364.33	7153.72	6995.19	7876.63	7787.83	4871.96	5637.34	7897.54	7661.96	6972.45	6028.1
GO_INTERLEUKIN_8_BIOSYNTHETIC_PROCESS	7250.16	8363.28	8359.14	8351.74	8196.57	7124.62	7242.08	5642.93	7258.24	5349.76	6077.85	7980.65	8161.06	6668.5	6174.08
GO_GRANULOCYTE_MACROPHAGE_COLONY_STIMULATING_FACTOR_PRODUCTION	7250.12	7586.48	7097.54	8263.39	7799.99	7007.04	7376.38	7123.87	7398.05	6058.09	5325.68	7930.57	7748.51	6766.48	6902.85
GO_POSITIVE_REGULATION_OF_INTERLEUKIN_10_PRODUCTION	7248.8	7375.81	7115.92	7859.27	7696.29	8024.31	8177.06	7881.95	7581.38	5893.27	6673.41	7121.79	6984.32	6825.85	6927.78
GO_POSITIVE_REGULATION_OF_NIK_NF_KAPPAB_SIGNALING	7248.45	7633.46	7680.4	7699.17	7689.38	7357.4	7274.66	7008.86	7068.5	6823.09	7281.12	7222.24	7144.89	7216.09	7152.28
GO_POSITIVE_REGULATION_OF_CELLULAR_PROTEIN_CATABOLIC_PROCESS	7244.53	6974.92	7042.09	7208.83	7081.41	7099.79	7008.97	7634.71	7390.69	7746.3	7454.31	7280.24	7153.18	7761.98	7286.88
GO_REGULATION_OF_LYMPHOCYTE_MIGRATION	7243.81	7644.24	7181.78	7533.57	7339.27	7228.19	7155.74	7733.43	7259.44	5807.91	6933.6	7770.28	7488.97	7167.07	6477.29
GO_CHROMATIN_ORGANIZATION_INVOLVED_IN_REGULATION_OF_TRANSCRIPTION	7243.44	6987.17	7021.89	7130.1	6988.07	7487.08	7261.19	7327.15	7549.44	6422.04	6307.28	7341.51	7518.46	7376.62	7225.69
GO_RNA_LOCALIZATION	7237	7269.91	7096.96	7248.25	7130.45	7282.93	6937.82	7389.3	7225.76	7111.41	6837.76	7338.64	7271.4	7632.53	6920.36
GO_VASCULAR_ASSOCIATED_SMOOTH_MUSCLE_CELL_APOPTOTIC_PROCESS	7235.99	8092.45	8759.6	8122.33	8203.06	7732.48	7762.82	5298.86	5788.21	5234.18	5768.79	6523.27	7000.03	7114.81	7357.17
GO_MRNA_CIS_SPLICING_VIA_SPLICEOSOME	7231.77	7491.56	7258.1	7060.9	7108.21	6947.4	6896.99	7821.84	7507.56	7091.14	7205.44	7526.9	7520.78	7740.89	6371.59
GO_APOPTOTIC_PROCESS_INVOLVED_IN_MORPHOGENESIS	7230.37	7186.29	7274.46	6996.65	6876.7	6855.92	6847.99	8403.92	8203.68	7904.16	7407.24	7681.93	7602.36	6526.29	6833.74
GO_CELLULAR_RESPONSE_TO_PEPTIDE	7230.2	7235.85	7360.63	7428.11	7281	7152.18	7224.56	7330.61	7405.62	6807.36	6774.22	7104.13	7123.35	7283.2	7173.32
GO_MODULATION_BY_VIRUS_OF_HOST_MORPHOLOGY_OR_PHYSIOLOGY	7229.41	6773.77	6816.14	7152.3	6652.5	7306.53	7059.94	8163.67	7948.94	7485.05	7443.12	7908.31	8020.86	7043.05	5324.41
GO_PEPTIDE_CATABOLIC_PROCESS	7227.45	6382.49	7273.27	7137.64	7236.6	7800.9	8007.19	7414.88	7218.31	6273.08	6713.09	6944.68	7288	7274.82	6099.36
GO_REGULATION_OF_GOLGI_ORGANIZATION	7226.03	6947.37	7185.75	7021.2	6661.61	7365.4	7206.96	8239.87	7886.36	7146.84	7313.33	6993.45	7245.09	7571.28	8697.63
GO_POSITIVE_REGULATION_OF_CYTOPLASMIC_TRANSPORT	7225.57	7249.71	7275.91	7173.88	7355.03	7501.67	7499.43	6645.19	7290.65	6489.17	6670.94	6308.21	6778.58	7201.43	7420.05
GO_PHOSPHORYLATION_OF_RNA_POLYMERASE_II_C_TERMINAL_DOMAIN	7225.14	7551.19	7244.74	7178.61	7497.95	7373.55	7205.54	6721.25	6736.84	7374.42	5440.57	6941.8	6770.67	8189.91	7589.68
GO_REGULATION_OF_CELLULAR_RESPONSE_TO_INSULIN_STIMULUS	7223.07	7405.5	7571.26	7553.24	7633.47	7531.24	7543.26	7078.82	7245.5	6491.12	6712.33	7059.93	7099.45	6681.49	7200.65
GO_RESPONSE_TO_ENDOPLASMIC_RETICULUM_STRESS	7221.29	7171.55	7320.04	7215.97	6947.98	6938.59	6751.2	7527.06	7488.07	7590.29	7552.49	7226.62	7109.85	7644.98	7214.77
GO_REGULATION_OF_TRIGLYCERIDE_METABOLIC_PROCESS	7219.75	7441.8	7789.65	7550.22	7246.84	7785.84	7590.71	6068.69	7192.65	5798.82	6523.37	5430.5	6427.5	7566.98	5863.17
GO_REGULATION_OF_SEQUESTERING_OF_TRIGLYCERIDE	7217.98	7005.8	7519.35	7435.98	6860.16	7489.78	7430.17	4269.74	5890.7	7466.49	6355.01	4653.53	4815.11	8295.55	7479.97
GO_MITOCHONDRIAL_DEPOLARIZATION	7217.27	6848.94	7297.69	7136.85	6832.39	7056.95	6913.18	8507.72	7972.64	6757.66	6854.65	8093.17	7784.72	8020.56	9008.11
GO_NUCLEAR_PORE_ORGANIZATION	7216.73	7613.24	7151.67	7281.8	7294.41	8200.55	7550.91	6308.69	5660.4	7512.4	5928.37	6527.16	5515	7795.62	6273.08
GO_REGULATION_OF_T_CELL_DIFFERENTIATION	7216.65	7207.06	7081.58	7543.59	7226.25	7261.61	7150.44	8145.05	8023.57	5150.93	6156.03	8302.78	8182.69	7027.71	6089.63
GO_POSITIVE_REGULATION_OF_INTRACELLULAR_TRANSPORT	7215.85	7074.26	7159.46	7332.54	7059.62	7336.91	7265.21	7616.71	7490.32	7153.39	6975.48	7169.57	7123.66	7262.12	7387.65
GO_RESPONSE_TO_HEPATOCYTE_GROWTH_FACTOR	7214.03	7231.63	7541.48	7219.07	7136.76	7314.92	7208.98	7592.04	7817.44	7167.81	6132.58	6532.24	7081.09	7634.11	5761.65
GO_REGULATION_OF_PROTEIN_STABILITY	7213.57	7332.07	7265.33	7310.52	7173.14	7059.72	6783.69	7253.99	7081.82	7308.15	7374.56	6973.17	6815.21	7277.11	7148.02
GO_NADH_METABOLIC_PROCESS	7213.46	6859.18	7009.83	7390.62	7311.06	7411.12	6866.07	7123.93	7127.03	7202.98	7354.9	7223.94	7737.88	7474.88	6252.91
GO_REGULATION_OF_FIBROBLAST_MIGRATION	7211.89	6051.46	6158.24	7314.45	6582.23	5625.22	5713.49	7439.13	7932.97	7109.33	7890.31	7765.96	7682.21	8330.03	7006.17
GO_GANGLIOSIDE_METABOLIC_PROCESS	7211.45	7553.63	7436.2	7498.32	7356.23	6604.25	6668.03	6980.46	6997.83	5984.55	7066.68	7949.37	7560.62	7657.26	4650.54
GO_REGULATION_OF_DNA_BINDING_TRANSCRIPTION_FACTOR_ACTIVITY	7210.88	7217.88	7222.7	7462.31	7212.16	7209.59	7133.28	7655.68	7611.97	6917.44	6779.56	7324.03	7127.26	7075.29	6805.85
GO_POSITIVE_REGULATION_OF_PROTEIN_CONTAINING_COMPLEX_ASSEMBLY	7207.83	7249.65	7277.57	7201.51	6863.65	6985.46	6941.81	7603.66	7524.49	7050.36	7114.78	7261.21	7207.89	7211.85	7207.77
GO_PROTEIN_SUMOYLATION	7207.24	7325.85	7193.72	7220.75	7297.52	7153.95	7001.08	7475.64	7299.66	7271.49	6565.99	7367.55	6978.51	7151.49	6156.85
GO_POSITIVE_REGULATION_OF_SMOOTH_MUSCLE_CELL_APOPTOTIC_PROCESS	7206.48	7993.36	8567.04	7286.18	7525.44	7724.67	7126.79	6464.47	6461.4	6103.3	5660.16	7459.44	7634.34	6299.56	6906.71
GO_ENDOTHELIAL_CELL_DEVELOPMENT	7206.24	6854.06	6774.31	7305.62	7106.87	6857	7029.85	7554.88	7334.46	7707.7	7862.3	7043.61	6756.23	7442.57	7581.37
GO_CELLULAR_EXTRAVASATION	7205.68	7678.27	7265.55	7455.68	7185.91	7811.37	7871.53	6899.25	7560.02	6232.24	6184.77	7225.44	7155.27	6214.54	6724.48
GO_PROTEIN_DESTABILIZATION	7205.16	7567.73	7404.28	7004.89	7161.73	7047.1	6748.91	7425.6	7844.16	6484.79	6150.59	7774.65	7813.88	7248.6	6994.4
GO_POSITIVE_REGULATION_OF_LYMPHOCYTE_CHEMOTAXIS	7203.85	7957.51	7381.54	7563.4	7906.44	6897.37	6714.86	8356.65	6793.08	4245.21	6492.46	8955.03	7429.9	7026.16	6202.18
GO_POSITIVE_REGULATION_OF_LEUKOCYTE_MEDIATED_IMMUNITY	7202.32	7441.7	7156.39	7727.6	7393.31	7118.66	6942.82	7248.25	7397.61	4600.31	5807.46	7331.84	7331.87	7115.87	5692.77
GO_EPHRIN_RECEPTOR_SIGNALING_PATHWAY	7198.69	7142.73	6855.33	7187.23	7093.97	7324.18	7210.16	7585.4	7626.36	7578.9	7089.34	6609.38	6670.43	7218.59	7591.48
GO_SECRETION	7198.01	7208.38	7140.14	7415.07	7216.71	7397.22	7387.02	7187.63	7294.06	6690.61	7021.23	6753.31	6657.95	7216.18	7095.86
GO_CIRCADIAN_REGULATION_OF_GENE_EXPRESSION	7197.83	7036.16	6922.89	7160.72	6814.36	6587.57	6521.59	8058.33	7608.21	8543.17	8225.09	7065.21	7234.94	7536.46	7609.03
GO_POST_EMBRYONIC_ANIMAL_ORGAN_DEVELOPMENT	7195.9	7177.55	7400.07	7214.25	6707.89	6735.95	7105.26	8506.96	8548.88	7021.55	7441.66	7944.78	7939.66	6942.84	6367.2
GO_REGULATION_OF_ERBB_SIGNALING_PATHWAY	7194.51	7128.02	7241.8	7170.76	6668.7	6920.99	7131.42	8023.82	7617.03	7292.57	7771.18	7126.63	7218.26	7073.04	7462.45
GO_POSITIVE_REGULATION_OF_CELL_ADHESION	7194.08	7235.26	7170.94	7458.72	7217.22	6972.26	6940.85	7870.94	7789.27	6255.65	6766.55	7409.98	7315.71	7143.19	6403.22
GO_GLYCEROPHOSPHOLIPID_CATABOLIC_PROCESS	7192.21	7009	7352.76	7158.15	7231.04	7318.4	7226.27	6669.13	7242.47	5950.52	6530.62	6829.82	7264.18	7485.88	6190.72
GO_NEGATIVE_REGULATION_BY_HOST_OF_VIRAL_TRANSCRIPTION	7191.08	7124.53	7610.74	6943.75	7381.02	6385.06	5940.12	8652.21	8457.44	6588.78	6332.29	7603.89	7257.63	7438.37	6946.67
GO_POSITIVE_REGULATION_OF_ACTIN_FILAMENT_DEPOLYMERIZATION	7189.12	7228	7383.96	7071.36	7150.23	6002.42	6249.99	7893.06	7736.72	8341.49	7344.95	6761.71	5924.04	7012.58	7336.96
GO_REGULATION_OF_MITOPHAGY	7188.31	6932.4	6968.37	7152.59	7176.66	7445.04	7199.96	7016.2	6970.36	7063.21	7250.45	7356.57	7564.29	7297.08	7375.41
GO_NEGATIVE_REGULATION_OF_GENE_EXPRESSION_EPIGENETIC	7186.12	6860.19	6903.48	7133.89	6933.52	7345.3	7187.52	7219.1	7403.51	6387	6187.08	7235.51	7386.87	7266.71	7184.72
GO_REGULATION_OF_PRODUCTION_OF_MOLECULAR_MEDIATOR_OF_IMMUNE_RESPONSE	7184.03	7280.92	6992.2	7711.6	7448.98	7038.52	7031.17	7323.55	7582	5257.41	6312.72	7486.98	7542.55	7087.13	6446.36
GO_NEGATIVE_REGULATION_OF_TELOMERE_MAINTENANCE_VIA_TELOMERE_LENGTHENING	7182.73	6363.9	6809.59	7354.01	7202.07	7167.3	7064.76	7754.23	7227.05	6291.7	6231.62	7997.58	7475.96	7198.17	6154.44
GO_HISTONE_DEUBIQUITINATION	7182.24	6848.9	7230.48	7224.65	6984.39	7331.79	7148.69	7301.32	7215.79	6781.29	6534.73	7302.44	6928.8	7326.28	6203.38
GO_REGULATION_OF_LYMPHOCYTE_DIFFERENTIATION	7181.2	7235.83	7114.06	7523.46	7146.32	7214.31	7148.09	7880.74	7830.14	4993.21	5941.75	8031.78	7854.63	7141.63	6159.05
GO_ORGANELLE_MEMBRANE_FUSION	7180.65	7432.38	7259.76	7205.68	7275.83	7547.11	7529.24	7201.92	6893.04	6512.54	6185.05	7159.39	7108.72	7046.91	6711.59
GO_MODULATION_BY_HOST_OF_VIRAL_PROCESS	7179.85	6531.42	6549.73	6872.72	6595.98	6955.3	7012.87	7933.65	7905.59	7632.91	8129.22	7500.14	7634.75	7346.83	6658.71
GO_POSITIVE_REGULATION_OF_PROTEIN_IMPORT	7179.16	7441.5	7161.69	7647.36	7252.54	6916.96	6775.99	7760.72	7648.67	7424.65	6978.58	6642.33	6418.69	7196.62	6982.27
GO_NEGATIVE_REGULATION_OF_VIRAL_TRANSCRIPTION	7175.94	6587.12	6829.5	6620.83	6791.1	6704.79	6426.7	8782.81	8559.04	7857.28	7240.94	7554.85	7437.73	7110.94	7649.64
GO_CELLULAR_RESPONSE_TO_ANTIBIOTIC	7175	6897.61	6618.7	7433.57	7111.72	6986.29	6910	7418.44	7372.86	7626.14	7501.82	7025.27	7032.07	7287.52	7238.27
GO_POSITIVE_REGULATION_OF_INTERLEUKIN_12_PRODUCTION	7174.93	6920.86	6851.11	7795.26	7438.62	7243.73	7197.8	7152.05	7645.18	5421.21	6227.45	8079.1	7967.31	6495.32	5577.78
GO_POSITIVE_REGULATION_OF_FAT_CELL_DIFFERENTIATION	7174.78	6789.99	6929.57	7587.75	7367.99	6401.26	6730.47	7161.69	7548.3	6758.02	7336.53	7078.06	7283.7	7568.23	7187.87
GO_NEUROTRANSMITTER_BIOSYNTHETIC_PROCESS	7173.53	7732.96	7793.31	7535.99	7287.54	6554.84	6726.97	7810.46	7478.09	6437.08	7120.44	7226.62	6813.99	7097.8	6965.43
GO_POSITIVE_REGULATION_OF_MITOCHONDRIAL_OUTER_MEMBRANE_PERMEABILIZATION_INVOLVED_IN_APOPTOTIC_SIGNALING_PATHWAY	7169.29	6795.13	7200.18	6418.37	6364.65	6802.88	6563.77	8378.51	7978.91	7319.39	7416.57	7138.39	7048.87	7487.3	7340.44
GO_CELLULAR_RESPONSE_TO_HYDROGEN_PEROXIDE	7166.93	7029.4	6788.82	7356.75	7084.17	6896.5	6823.3	7438.65	7486.85	7475.78	7431.2	6777.48	6826.95	7249.69	7494.66
GO_POSITIVE_REGULATION_OF_HISTONE_METHYLATION	7165.81	7178.01	7212.43	7486.53	7442.45	7434.82	7205.38	7153.62	7456.9	6374.78	6657.09	6836.87	6781.64	6728.33	6220.02
GO_REGULATION_OF_T_CELL_ACTIVATION	7165.39	7216.89	7052.15	7458.88	7172.12	7158.66	7034.71	7872.15	7808.28	5135.77	6067.18	7741.5	7558.36	6942.35	5818.58
GO_REGULATION_OF_PROTEIN_TARGETING_TO_MITOCHONDRION	7164.65	7063.2	7123.34	7449	7205.96	7655.6	7617.61	7217.28	6715.25	6959.27	6602.89	7063.43	7107.36	7554.76	8095.38
GO_NUCLEOTIDE_PHOSPHORYLATION	7164.15	6935.83	6785.19	7103.08	6921.28	7236.57	7126.84	7544.64	7239.45	7515.67	7447.46	7084.74	7201.46	7244.92	6593.01
GO_REGULATION_OF_CHROMATIN_BINDING	7160.8	7125.26	6677.39	7149.37	7172.23	7673.93	7428.43	7648.03	7875.21	7002.99	5957.4	8269.47	8105.83	6927.86	5741.16
GO_NEGATIVE_REGULATION_OF_KINASE_ACTIVITY	7160.58	7119.47	7246.53	7162.96	6904.23	7080.44	7061.38	8020.49	7784.43	7355.57	7158.2	7119.62	7024.89	7222.33	7680.03
GO_CELL_CHEMOTAXIS	7160.26	7331.24	7127.59	7402.99	7305.25	6861.8	7119.84	7582.83	7467.28	6391.06	6893.52	7192.93	6756.37	7220.42	6646.18
GO_POSITIVE_REGULATION_OF_MONOCYTE_CHEMOTACTIC_PROTEIN_1_PRODUCTION	7160.21	7169.18	7151.24	8021.59	7438.4	7017.27	6969.33	6612.35	7248.62	5784.78	7469.8	6766.52	7028.46	8053.83	7790
GO_LYMPHOCYTE_APOPTOTIC_PROCESS	7157.61	6928	6826.2	7635.37	7175.24	7241.8	7139.98	8103.6	7860.76	5698.79	6443.53	7704.31	7474.98	6806.21	5995.45
GO_CELLULAR_RESPONSE_TO_STARVATION	7155.17	7372.21	7324.75	7554.94	7418.19	7160.82	6831.51	7149.51	7121.76	7553.84	6872.16	6887.89	6816.59	7674.59	6908.98
GO_DEFENSE_RESPONSE_TO_OTHER_ORGANISM	7154.66	7263.47	6983.74	7254.96	7091.77	7162.35	7146.96	7804.93	7524.09	5922.76	6813.69	8002.92	7804.59	7058.52	6775.33
GO_NEGATIVE_REGULATION_OF_TRANSFERASE_ACTIVITY	7152.7	7029.29	7202.52	7158.07	6889.77	7054.59	6955.4	7919.27	7639.74	7213.17	7025.22	7147.32	6990.18	7205.03	7548.19
GO_REGULATION_OF_PINOCYTOSIS	7152.27	6608.34	7005.15	6890.45	6116.37	7416.59	7249.86	8977.79	8985.74	8157.29	5343.75	7054.68	7866.02	8104.82	6681.36
GO_CD8_POSITIVE_ALPHA_BETA_T_CELL_ACTIVATION	7151.91	6809.17	6714.71	7801.7	7139.4	6985.97	7064.85	7963.55	7437.31	5252.9	7257.01	7997.1	7708.05	7164.42	6979.35
GO_RETROGRADE_AXONAL_TRANSPORT	7150.94	7107.08	7333.91	7055.07	7071.8	7050.92	7139.82	8067.99	8014.98	8580.38	8390.45	7174.02	7162.05	7139.79	5605.9
GO_INTRINSIC_APOPTOTIC_SIGNALING_PATHWAY_BY_P53_CLASS_MEDIATOR	7149.35	6519.71	6713.79	6593.18	6121.92	6181.65	6263.01	7874.79	7330.93	7505.35	7564.71	7155.71	7143	7177.6	7410.12
GO_POSITIVE_REGULATION_OF_PROTEIN_BINDING	7148.43	7023.08	7104.29	7372.68	7253.24	6891.47	6643.24	7217.64	7182.83	6755.84	7114.03	7031.66	7247.14	7535.39	7317.6
GO_HISTONE_H3_K36_DEMETHYLATION	7148.13	7072.28	6562.79	6069.88	6463.08	7319.3	6728.03	7223.98	7392.17	7587.51	6748.96	7417.73	7767.86	6563.45	8188.81
GO_RESPONSE_TO_PEPTIDE_HORMONE	7147.86	7092.5	7207.22	7357.28	7203.21	7068.68	7055.95	7271.31	7208.69	6934.98	7037.04	6923.13	6915.58	7338.82	7205.22
GO_THYMIC_T_CELL_SELECTION	7146.49	7273.19	6720.29	7533.77	6876.86	7753.47	7019.79	8463.67	8459.34	1585.17	3196.42	7927.87	7786.89	6323.7	5386.13
GO_HISTONE_H4_ACETYLATION	7145.91	6757.61	7013.25	6638.17	6824.56	7302.19	7146.63	7472.04	7388.04	7504.82	6744	7145.2	7266.85	7415.95	6937.13
GO_RNA_DEPENDENT_DNA_BIOSYNTHETIC_PROCESS	7145.86	7162.1	6964.4	7133.93	7180.57	7296.3	7084.16	7713.73	6990.46	6953.98	6422.63	7573.2	7157.78	7199.99	6641.64
GO_ACTIN_CYTOSKELETON_REORGANIZATION	7144.86	6907.25	6840.55	7292.47	6900.12	6635.17	6997.25	7940.39	7832.93	7582.26	7622.74	6578.01	6394.25	7665.15	7757.25
GO_RESPONSE_TO_MINERALOCORTICOID	7141.46	7086.33	7206.32	7395.54	7196.58	6452.53	6438.26	6215.44	6377.63	7677.01	7253.95	6992.92	7200.08	6881.91	7396.56
GO_INTRACELLULAR_TRANSPORT	7139.18	7029.79	7000.56	7065.4	6812.01	7190.81	7002.28	7766.42	7356.79	7701.7	7624.77	7087.55	6958.36	7610.34	7378.13
GO_T_CELL_MEDIATED_IMMUNITY	7139.15	7093.72	6830.31	7941.3	7820.74	7049.14	7082.9	7541.93	7499.42	4952.22	6491.82	7900.66	7774.3	7184.59	6298.28
GO_RESPONSE_TO_INSULIN	7138.59	7117.7	7235.64	7363.55	7256.62	7147.32	7108.58	7131.63	7145.39	7131.8	7074.31	6893.71	7017.16	7586.78	7287.84
GO_REGULATION_OF_UBIQUITIN_DEPENDENT_PROTEIN_CATABOLIC_PROCESS	7137.9	7214.54	7123.16	7343.62	7114.75	7029.25	6750.54	7474.07	7089.02	7324.13	7226.1	7143.9	6874.33	7563.51	7131.91
GO_REACTIVE_OXYGEN_SPECIES_METABOLIC_PROCESS	7133.57	7333.62	7136.15	7291.34	7130.99	7084.14	7008.53	7560.69	7367.78	6808.14	7207.13	6836.47	6715.96	6990.62	7424.91
GO_AMYLOID_BETA_METABOLIC_PROCESS	7131.92	6931.61	6939.81	7164.01	6862.47	7823.69	7557.2	7431.16	8050.93	7027.79	8102.19	6740.96	7099.83	7278.53	6353.12
GO_SUPEROXIDE_METABOLIC_PROCESS	7131.27	7157.73	6860.67	7140.91	7073.18	7172.89	7121.62	7537.71	7464.26	7080.95	7431.77	6367.48	6353.38	6823.61	7672.29
GO_NEGATIVE_REGULATION_OF_PROTEASOMAL_PROTEIN_CATABOLIC_PROCESS	7129.45	7020.94	6640.43	7459.65	7094.3	7093.32	6670.28	7825.22	7001.83	7268.74	7768.43	7216.42	7164.6	7166.98	6998.61
GO_CD4_POSITIVE_ALPHA_BETA_T_CELL_CYTOKINE_PRODUCTION	7129.4	6978.82	6741.63	7569.89	7596.83	6739.1	6549.19	8210.34	7682.81	5699.44	7279.99	9128.3	8732.46	5989.54	6030.99
GO_MEMBRANE_FUSION	7129.21	7248.01	7067.47	7179.6	7169.67	7414.79	7423.87	7246.91	7014	6747.63	6605.4	7112.73	7059.76	7145.69	6632.95
GO_WOUND_HEALING_SPREADING_OF_EPIDERMAL_CELLS	7128.81	6979.56	7278.06	7288.79	6978.93	7513.26	7549.91	7449.22	7890.03	6305.08	6593.71	6185.77	5868.82	8020.79	5780.42
GO_POSITIVE_REGULATION_OF_PROTEOLYSIS_INVOLVED_IN_CELLULAR_PROTEIN_CATABOLIC_PROCESS	7128.45	6879.41	6962.51	7145.9	7025.58	6799.19	6707.19	7583.99	7275.58	7621.49	7277.47	7168.35	6969.72	7556.91	7110.99
GO_REGULATION_OF_HISTONE_MODIFICATION	7127.59	7210.82	7115.93	7511.3	7297.76	7261.21	7078.5	7314.89	7438.87	6588.75	6402.66	6952.94	7067.33	7031.6	7139.25
GO_ACTIVATION_OF_MAPKK_ACTIVITY	7125.61	7263.98	7092.33	7397.28	7216.68	7681.45	7667.61	7118.9	7132.32	7018.13	6294.57	6814.42	6629.24	7024.31	7457.18
GO_PLASMA_MEMBRANE_TUBULATION	7124.87	7524.76	7431.13	6983.36	6836.52	6533.68	6597.85	7920.15	7644.79	7221.58	6789.14	7028.16	7251.51	6354.22	7831.91
GO_POSITIVE_REGULATION_OF_ACTIN_CYTOSKELETON_REORGANIZATION	7122.96	6569.9	7023.01	7835.39	7205.51	6394.91	6640.66	8334.38	8325.54	7810.96	7040.4	6589.65	6859.97	7513.4	7625.85
GO_CELL_DEATH_IN_RESPONSE_TO_OXIDATIVE_STRESS	7117.74	7150.06	7134.43	7134.98	6986.5	6970.22	6802.18	7232.27	7081.94	6698.41	7173.6	7101.04	6803.67	7665.32	7412.73
GO_CARBOHYDRATE_CATABOLIC_PROCESS	7117.66	6746.6	6776.73	7209.22	7113.28	7429.81	7274.3	7122.04	7155.54	6822.61	7143.06	6998.28	7017.39	7264.93	6949.16
GO_VASCULAR_ENDOTHELIAL_GROWTH_FACTOR_PRODUCTION	7117.58	7288	7170.4	7747.98	7621.32	6605.59	6817.29	7064.75	6751.14	7532.54	7478.39	6472.37	5922.22	7883.45	6576.89
GO_CYTOKINE_SECRETION	7116.93	7441.86	7378.36	7698.26	7416.14	7225.69	7304.1	6811.79	7178.7	5864.43	6243.41	7055.15	6976.61	6836.5	6557.71
GO_ESTABLISHMENT_OF_PROTEIN_LOCALIZATION_TO_PLASMA_MEMBRANE	7116.76	6816.43	6701.8	6806.17	6625.28	6966.83	6951.43	7964.27	7747.62	8153.69	7675.97	7390.26	7152.14	7081.37	7954
GO_IMMUNE_RESPONSE_TO_TUMOR_CELL	7115.75	6747.04	6858.15	7466.87	6741.28	7574.86	6592.63	8520.84	7574.96	5339.39	7373.35	9061.3	9204.73	6803.97	3140.19
GO_TELOMERASE_RNA_LOCALIZATION	7115.58	7232.17	6905.22	7321.54	6998.99	6653.13	6666.71	7638.32	6522.91	8210.45	8533.94	6883.46	6359.07	7827.78	7883.67
GO_RESPONSE_TO_GROWTH_HORMONE	7114.82	6796.64	6687.99	7148.44	6832.32	6949.43	7387.11	7723.84	7658.26	7305.89	7422.11	7081.19	7066.25	6195.15	8191.02
GO_REGULATION_OF_PROTEIN_DEACETYLATION	7114.12	6887.93	7093.44	7541.87	7134.81	7265.62	7272.46	7563.86	7449.37	6047.24	6295.38	6882.75	6741.86	6891.01	7535.11
GO_NEGATIVE_REGULATION_OF_CILIUM_ASSEMBLY	7112.26	6541.41	6783.14	6602.28	6366.94	7916.43	8377.07	7975.15	7286.45	8451.8	8099.44	6399.14	6495.13	7791.43	6938.07
GO_PROTEIN_STABILIZATION	7112.14	7220.94	7188.51	7420.64	7188.31	6987.65	6700.49	7104.32	6825.07	7254	7538.74	6728.67	6517.34	7119.97	7064.97
GO_POSITIVE_REGULATION_OF_LIPID_LOCALIZATION	7111.83	7327.97	7517.32	7390.12	7116.99	6910.28	7106.67	6833.15	7452.93	6767.73	7489.42	6533.71	6933.78	7524.65	6091.09
GO_REGULATION_OF_RESPIRATORY_BURST	7109.6	8138.12	7929.22	7220.81	6998.39	5778.73	6338.1	8517.51	8256.29	5212.47	6273.74	8244.74	8494.42	6882.27	6489.95
GO_POSITIVE_REGULATION_OF_B_CELL_MEDIATED_IMMUNITY	7108.43	7057.99	7092.54	7479.85	7193.6	6562.99	6269.14	7124.32	7227.34	4197.92	6265.06	8074.87	8098.66	8075.56	5350.16
GO_POSITIVE_REGULATION_OF_INTERFERON_GAMMA_PRODUCTION	7108.31	7255.36	6878	7491.66	7451.32	6961.26	6732.6	7697.17	7510.43	4269.96	5329.52	8190.05	8281.08	6760.26	4813.57
GO_POSITIVE_REGULATION_OF_CELL_SUBSTRATE_ADHESION	7107.2	7132.03	7157.34	7023.81	6730.56	6768.59	6984.38	7947.9	7836.15	7708.55	7581.25	6826.37	6643.08	7232.33	7082.36
GO_PROTEIN_LOCALIZATION_TO_EARLY_ENDOSOME	7105.85	6572.49	6205.43	6340	6023.6	7038.83	7193.06	7534.94	7172.88	8465.72	7988.05	5705.13	6029.1	7858.66	7186.63
GO_ENDOPLASMIC_RETICULUM_TO_GOLGI_VESICLE_MEDIATED_TRANSPORT	7103.57	7164.51	7144.26	6874.38	7026.15	7413.02	7400.79	7112.37	6987.12	6893.12	7088.49	7191.05	7094.77	7416.99	7008.13
GO_PROTEIN_LOCALIZATION_TO_ORGANELLE	7103.49	7095.03	7011.23	7054.29	6795.99	6906.42	6620.87	7787.45	7246.32	7661.36	7481.7	7111.95	6885.28	7677.88	7289.77
GO_NEGATIVE_REGULATION_OF_RECEPTOR_INTERNALIZATION	7101.51	6750.88	6845.02	7649.64	7470.5	7801.19	7858.78	7585.88	7358	8111.72	6135.29	5866.31	6155.29	6711.54	6106.58
GO_INFLAMMATORY_RESPONSE	7101.42	7137.43	7065.41	7489.71	7292.44	7161.66	7226.76	7181.21	7338.81	6048.44	6678.06	7026.85	6849.66	6912.2	6418.57
GO_PROTEIN_FOLDING	7098.87	6979.79	7121.05	7237.69	7121.13	6550.99	6033.47	7282.66	6892.16	7370.55	7255.11	7185.22	7022.44	7076.69	6559.51
GO_CD8_POSITIVE_ALPHA_BETA_T_CELL_DIFFERENTIATION	7098.5	6723.9	6650.78	7460.15	7239.49	6957.51	7348.13	8393.24	7847.24	4061.9	6516.13	7849.62	7576.08	6892.11	5952.68
GO_NEGATIVE_REGULATION_OF_VASCULAR_PERMEABILITY	7098.17	6442.89	6825.88	7802.72	7063.15	6554.12	6520.84	7214.75	7520.32	7133.19	7397.36	4855.48	4718.15	7256	8289.41
GO_POSITIVE_REGULATION_OF_SEQUESTERING_OF_CALCIUM_ION	7096.86	6658.85	7008	6631.57	7282.56	7782.67	7654.31	7165.08	7028.64	5912.35	6794.84	8376.77	7897.58	8686.87	3821.15
GO_PROTEIN_LOCALIZATION_TO_MITOCHONDRION	7096.44	6743.41	6905.3	6985.22	6776.18	7065.69	6560.85	7552.45	7307.19	7127.19	7190.58	7312.38	7206.52	7382.82	6983.1
GO_POSITIVE_REGULATION_OF_ESTABLISHMENT_OF_PROTEIN_LOCALIZATION_TO_TELOMERE	7096.08	7218.77	6939.41	7337.03	6973.39	6367.42	6326.3	7610.08	6416.85	8041.8	8362.87	6941.49	6687.45	8577.48	8177.49
GO_CELLULAR_RESPONSE_TO_GAMMA_RADIATION	7095.69	6711.32	6235.38	7120.95	6717.44	6300.46	6064.82	7656.75	7070.44	7298.65	7878.85	7624.86	6983.62	7410.74	7206.75
GO_TYPE_2_IMMUNE_RESPONSE	7094.71	6798.5	6541.85	7404.49	7286.29	6840.64	6903.14	8725.7	8386.15	6382.71	7585.05	8986.06	8761.56	6518.35	6210.98
GO_MONOCYTE_CHEMOTAXIS	7094.42	6721.43	6490.73	7023.85	7164.98	5878.79	6201.52	7201.61	7580.68	5760.58	7660.87	8193.89	7593.24	7324.86	6031.29
GO_REGULATION_OF_MRNA_3_END_PROCESSING	7094.28	6948.61	6767.62	7052.99	6799.18	7672.28	7299.71	7229.78	6812.6	7352.27	6589.18	7265.58	7606.24	7135.58	6887.78
GO_POSITIVE_REGULATION_OF_CYTOKINE_SECRETION	7090.79	7480.51	7447.31	7685.95	7468.17	7314.31	7223.95	6699.47	7031.37	5906.88	6216.12	7014.1	6707.32	7150.21	6607.63
GO_ACTIN_POLYMERIZATION_OR_DEPOLYMERIZATION	7090.78	7033.08	6824.8	7093.36	6725.58	7046.56	7088.21	7624.25	7465.31	7488.86	7426.81	6787.04	6787.58	7206.98	7696.98
GO_PLATELET_DEGRANULATION	7087.85	6823.45	6887.28	7496.74	7241.21	7130.45	7343.94	7045.25	7281.14	6898.51	7333.26	6819.06	6761.87	7932.43	6664.04
GO_REGULATION_OF_RESPONSE_TO_EXTERNAL_STIMULUS	7086.81	7167.79	7050.81	7233.64	7084.86	7104.95	7088.75	7456.78	7447.07	6177.57	6725.42	7130.11	7005.16	7062.56	6552.43
GO_POSITIVE_REGULATION_OF_CHROMOSOME_ORGANIZATION	7085.25	7074.92	7026.8	7289.17	7232.29	7409.29	7095.58	7437.49	7114.38	6863.3	6414.14	7001.43	6940.43	7188.94	7009.34
GO_GOLGI_RIBBON_FORMATION	7082.04	6776.98	6778.05	6786.71	6641.11	7982.38	8114.43	7858.58	7357.63	6580.34	6536.92	7239.02	7210.52	7623.16	6953.56
GO_REGULATION_OF_PLATELET_DERIVED_GROWTH_FACTOR_RECEPTOR_SIGNALING_PATHWAY	7079	6677.98	7010.58	7340.99	7246	7176.44	6625	8554.47	8155.87	7102.25	7634.1	6997.15	7055.75	6506.01	6454.74
GO_IMMUNE_RESPONSE_REGULATING_SIGNALING_PATHWAY	7075.89	7288.44	7016.8	7150.84	6929.23	7042.85	6772.48	7563.72	7366.16	5122.85	5868.02	7911.28	7819.9	7108.92	6373.72
GO_INTRACELLULAR_PROTEIN_TRANSPORT	7075.18	7009.83	6976.79	7077.19	6745.64	7073.18	6775.69	7773.93	7242.21	7748.02	7639.76	7009.99	6831.02	7584.21	7430.23
GO_CERAMIDE_BIOSYNTHETIC_PROCESS	7074.81	7059.26	7098.17	7071.4	6883.07	7078.22	7059.54	7271.94	6865.08	7579.47	7465.33	7198.63	7008.69	7205.49	5867.79
GO_POSITIVE_REGULATION_OF_IMMUNE_SYSTEM_PROCESS	7071.61	7228.16	7015.44	7249.41	7006.57	6995.23	6824.92	7521.83	7498.31	5304.1	6112.8	7736.28	7628.36	7127.78	6237.71
GO_RESPONSE_TO_FUNGUS	7071.55	7452.58	7119.73	7400.34	7814.83	7602.37	8059.42	7570.16	6826.62	5907.15	7023.11	6537.1	5838.31	6871.97	7023.37
GO_INTRA_GOLGI_VESICLE_MEDIATED_TRANSPORT	7071.21	6879.05	7111.49	6539.38	6720.89	7244.85	7069.69	7246.42	7072.72	7185.62	6864.66	6764.03	7067.75	7294.92	8384.12
GO_REGULATION_OF_CHROMATIN_ORGANIZATION	7071.2	7018.06	6946.99	7307.9	7016.69	7273.85	7061.83	7311.69	7429.98	6379.44	6278.86	7027.77	7156.97	7080.57	7087.47
GO_T_CELL_ACTIVATION	7069.03	7085.94	6875.02	7348.03	7109.53	7052.13	6920.12	7572.16	7378.02	4868.93	5741.67	7797.74	7559.32	6779.51	5949.2
GO_PYRUVATE_METABOLIC_PROCESS	7068.62	7015.16	6949.27	7102.91	6892.55	7242.89	6987.28	7106.02	7043.62	7256.06	7291.24	7019.25	7093.63	7648.65	6622.75
GO_REGULATION_OF_ICOSANOID_SECRETION	7068.2	8172.34	7870.54	7699.18	7632.21	7092.03	7347.68	5607.13	5695	5889.48	7137.5	7044.37	7008.53	6898.13	5926.14
GO_POSITIVE_REGULATION_OF_VASCULAR_ENDOTHELIAL_CELL_PROLIFERATION	7067.32	7399.19	7695.88	7779.49	7322.94	7482.18	7154.53	6205.23	6980.1	4259.2	6253.55	6952.35	7847.18	6819.09	6863.06
GO_RECEPTOR_CATABOLIC_PROCESS	7066.91	6037.1	5968.18	6409.44	6342.99	7422.03	7119.27	7641.28	7379.04	7099.52	6943.14	7057.05	7196.96	7006.25	7076.77
GO_RESPONSE_TO_HEAT	7065.27	7033.54	6797.13	7265.82	7103.88	6668.43	6489.61	7313.8	6914.37	7338.87	7144.06	7097.01	6795.46	7293.34	6627.1
GO_NEGATIVE_REGULATION_OF_DNA_BIOSYNTHETIC_PROCESS	7063.95	6505.65	6920	7611.46	7336.02	7491.92	6925.22	7265.98	7296.9	6056.85	5778.82	7510.54	7189.17	6938.72	5777.65
GO_REGULATION_OF_PRODUCTION_OF_SMALL_RNA_INVOLVED_IN_GENE_SILENCING_BY_RNA	7063.27	7050.9	6830.29	7031.78	6930.77	6702.01	6905.22	7268.05	6764.53	7080.02	7440.44	7213.29	7075.64	7413.1	7740.23
GO_NEGATIVE_REGULATION_OF_ERBB_SIGNALING_PATHWAY	7059.06	7036.38	7081.75	6902.43	6485.57	6452.3	6650.66	8272.49	7594.86	7570.83	7522.77	6956.69	6884.91	7251.54	7889.4
GO_POSITIVE_REGULATION_OF_T_CELL_MEDIATED_IMMUNITY	7058.16	7421.85	7168.51	8385.68	8217.16	6717.34	6771.04	6889.98	6947.8	5213.97	6429.03	7445.44	7381.76	7984.86	6715.76
GO_NUCLEOSIDE_CATABOLIC_PROCESS	7057.69	6542.12	6610.26	6782.96	6663.83	7787.7	7562.2	8605.19	8343.18	6883.57	7231.81	9122	8411.17	6548.64	4250.29
GO_ZYMOGEN_ACTIVATION	7056.68	7065.8	6884.69	7195.86	6926.94	6898.26	7077.47	8044.03	7444.21	6402.45	7047.55	6353.31	6398.9	7803.41	8014.8
GO_REGULATION_OF_RESPONSE_TO_OXIDATIVE_STRESS	7055.62	7081.61	7073.7	7119.13	6933.83	6625.55	6433.65	7339.92	7276.7	7037.54	7582.86	6991.77	6675	7597.73	6950.36
GO_MITOTIC_CELL_CYCLE_ARREST	7055.26	6797.32	6659.53	6449.49	6189.14	6789.17	7349.99	7664.51	8095.14	7072.65	7037.87	7273	6886.22	7455.08	7629.89
GO_REGULATION_OF_MACROPHAGE_CHEMOTAXIS	7053.79	6728.38	6779.17	6870.2	6068.09	7237.39	7615.91	8600.83	8690.63	6589.69	6323.46	7837.33	7256.46	7614.01	6002.74
GO_GOLGI_VESICLE_TRANSPORT	7053.25	6981.61	6913.27	6799.19	6818.57	7353.62	7330.69	7279.15	7058.89	6958.09	7047.61	7201.37	7073.27	7374.83	6874.57
GO_MEGAKARYOCYTE_DEVELOPMENT	7051.84	6977.71	6061.13	7304.12	6726.83	7342.32	6807.76	7718.48	7482.98	4631.78	5649.21	6906.41	7532.43	7125.97	8260.25
GO_NUCLEAR_TRANSCRIBED_MRNA_CATABOLIC_PROCESS_DEADENYLATION_DEPENDENT_DECAY	7051.65	7345.75	7273.29	7338.19	7016.39	7086.92	6909.47	7167.61	6964.51	7119.7	6915.33	7282.93	6761.35	6801.59	5606.73
GO_PLASMINOGEN_ACTIVATION	7050.48	7471.18	7315.98	7412.37	7195.54	5919.06	6107.76	7333.64	6905.42	5691.52	6673.85	6100.69	6274.4	7662.94	8702.54
GO_CELLULAR_RESPIRATION	7049.82	6856.76	6850.6	7097.6	6734.55	7133.32	6766.22	7909.77	6894.77	7736.83	7810.09	7309.22	6956.97	7968.5	7002.03
GO_UDP_N_ACETYLGLUCOSAMINE_METABOLIC_PROCESS	7047.67	7313.68	7243	6862.04	6236.48	5468	5101.72	7306.42	6978.87	7116.46	6893.81	7268.79	7490.59	7786.69	6360.29
GO_ANDROGEN_RECEPTOR_SIGNALING_PATHWAY	7045.52	7235.95	6884.84	7131.09	7050.37	6817.19	6732.86	7381.08	6970.44	7033.43	7258.73	7040.68	6955.79	7658	7705.09
GO_NATURAL_KILLER_CELL_MEDIATED_IMMUNITY	7045.49	7335.22	6840.42	6954.5	6295.75	7604.13	7136.48	8227.54	7476.65	3711.5	4814.64	7773.19	7740.94	5645.66	4483
GO_REGULATION_OF_OSTEOCLAST_DEVELOPMENT	7045	7931.78	7704.25	8328.06	7848.95	6517.78	6992.11	7097.9	7726.03	5072.14	6135.37	6735.5	6643.2	8354.81	3629.92
GO_PROTEIN_QUALITY_CONTROL_FOR_MISFOLDED_OR_INCOMPLETELY_SYNTHESIZED_PROTEINS	7042.88	7048.86	7333.66	7265.51	7075.85	7123.98	7257.53	6480.25	6950.23	7036.9	6814.65	6860.18	6614.27	7439.46	6911.2
GO_RESPONSE_TO_BIOTIC_STIMULUS	7040.71	7167.71	6972.04	7191.96	6992.24	7042.48	6994.38	7703.76	7453.82	6006.2	6799.65	7762.24	7547.62	7038.93	6714.26
GO_NEGATIVE_REGULATION_OF_LEUKOCYTE_MEDIATED_IMMUNITY	7040.51	6695.63	6273.36	7220.32	6860.7	7911.74	7668.49	7588.62	7319.32	4992.49	6381.18	7997.23	7915.72	6400.44	6747.32
GO_NEGATIVE_REGULATION_OF_ACTIVATED_T_CELL_PROLIFERATION	7037.95	6699.31	7049.55	7673.34	7111.86	7557.23	7255.98	7828.73	8055.3	3480.25	5586.82	7026.35	6759.45	6234.69	4159.71
GO_MACROPHAGE_DIFFERENTIATION	7033.72	7191.78	7090.99	7394.13	7071.21	6894.16	7330	7041.64	7310.78	5834.48	6720.41	6976.74	7020.13	7025.81	6609.07
GO_NEGATIVE_REGULATION_OF_IMMUNE_RESPONSE	7030.72	6869.28	6444.35	7076.97	6984.47	7327.27	7311.45	7394.41	7377.66	5474.06	6700.78	7425.48	7456.04	6795.34	6523.34
GO_RESPONSE_TO_VIRUS	7030.66	6993.65	6777.62	7202.25	6951.17	7067.67	6952.51	7925.02	7601.32	6699.56	7115.15	8765.14	8581.62	6589.94	6420.67
GO_GOLGI_TO_PLASMA_MEMBRANE_TRANSPORT	7030.47	6474.84	6647.86	6365.69	6241.19	6942.84	6957.2	7421.32	7079.01	7825.38	7510.72	7308.08	7074.7	6986.24	7187.55
GO_HISTONE_H2A_UBIQUITINATION	7026.73	6639.53	6832.33	6754.8	6834.39	7034.01	7019.44	7751.88	7709.21	6757.42	7164.56	7590.02	7530.19	7883.86	6810.33
GO_POSITIVE_REGULATION_OF_STEROL_TRANSPORT	7023.15	6746.18	6910.01	6427.63	6530.99	6832.39	7436.22	7912.49	8160.82	7525.59	8270.56	6219.26	7046.77	7324.02	6999.54
GO_PYRIMIDINE_RIBONUCLEOSIDE_METABOLIC_PROCESS	7021.75	6341.5	6383.68	6856.48	5787.45	9187.59	9273.37	9546.15	9428.74	6908.74	7134.77	10010.4	9655.61	4733.69	3227.27
GO_NEURAL_NUCLEUS_DEVELOPMENT	7020.01	6827.76	6992.95	6823.43	6697.1	7047.06	6988.48	8136.12	7487.25	7969.37	7730.07	6891.77	6759.53	7546.92	8468.57
GO_REGULATION_OF_HORMONE_BIOSYNTHETIC_PROCESS	7019.22	7025.81	6903.75	7505.36	7315.35	6864.53	6870.06	7199.44	7836.64	5989.54	7012.63	7239.55	7151.29	6620.26	6043.75
GO_REGULATION_OF_ANOIKIS	7019.18	7090.55	6919.55	7024.5	6096.74	6215.31	6342.6	8314.1	7858.79	6223.66	7013.87	7835.85	7361.34	7861	6720.26
GO_NEGATIVE_REGULATION_OF_PROTEIN_SERINE_THREONINE_KINASE_ACTIVITY	7019.03	6990.74	7085.39	7045.33	6756.09	6823.41	6728.43	7926.69	7657.18	7147.55	6923.81	7001.03	6820.54	7037.03	7497.28
GO_B_CELL_ACTIVATION_INVOLVED_IN_IMMUNE_RESPONSE	7018.27	7020.54	6784.72	7573.44	7198.45	7195.21	6491.67	7122.75	6913.21	4456.75	5580.13	7732.3	7308.74	7016	5073.67
GO_RESPONSE_TO_IMMOBILIZATION_STRESS	7015.74	7460.43	7460.63	6966.87	6527.27	6858.21	6486.01	7096.39	6787.62	7064.62	7152.18	6443.04	6250.3	7240.57	8518.16
GO_REACTIVE_OXYGEN_SPECIES_BIOSYNTHETIC_PROCESS	7015.39	7406.46	7341.71	7142.97	6940.25	6599.15	6569.42	7669.1	7396.17	6729.22	7310.37	6979.21	6659.35	6931.57	7051.58
GO_POSITIVE_REGULATION_OF_ENDOPLASMIC_RETICULUM_STRESS_INDUCED_INTRINSIC_APOPTOTIC_SIGNALING_PATHWAY	7014.93	7015.25	7148.17	6538.2	6670.96	6270.55	6392.47	7886.74	6113.47	8543.52	7508.75	6752.78	7014.61	7107.35	7353.86
GO_ACTIVATION_OF_IMMUNE_RESPONSE	7014.91	7098.78	6848.08	7035.64	6802.8	6994.18	6726.21	7462.53	7354.9	5099.95	5873.01	7809.55	7698.43	7076.82	6307.4
GO_POSITIVE_REGULATION_OF_DNA_TEMPLATED_TRANSCRIPTION_INITIATION	7014.23	6998.64	7239.5	7095.69	6941.3	6766.44	6175.98	7463.83	7459.31	6331.93	6595.06	7267.49	7105.37	7029.83	6330.1
GO_POSITIVE_REGULATION_OF_PROTEIN_CONTAINING_COMPLEX_DISASSEMBLY	7012.64	7002.94	7041.56	7022.33	6856.39	6183.67	6339.87	7102.62	7129.71	7543.94	7157.38	6982.2	6742.48	7035.14	6360.97
GO_SYNCYTIUM_FORMATION	7011.79	6809.47	6837.19	7269.95	6938.08	6683.25	6788.13	7022.86	7153.37	7000.72	8244.82	7023.76	7113.24	7964.38	6504.66
GO_REGULATION_OF_CARBOHYDRATE_CATABOLIC_PROCESS	7011.18	6877.5	6701.26	7213.75	7116.84	7352.65	7068.99	6953.38	6713.34	6673.79	6717.6	7295.87	7146.04	7319.24	6605.72
GO_ACUTE_INFLAMMATORY_RESPONSE	7011.01	7235.98	7354.61	7852.03	7538.52	6885.62	6999.14	7022.87	7135.29	6257.11	6770.94	6310.52	6134.68	6798.88	7133.32
GO_REGULATION_OF_PROTEASOMAL_PROTEIN_CATABOLIC_PROCESS	7010.54	6873.99	6828.48	7073.84	6809.76	6947.25	6642.88	7664	7151.79	7441.13	7432.63	7119.03	6918.98	7394.21	6909.51
GO_PROTEIN_K48_LINKED_UBIQUITINATION	7009.33	6770.21	6575.3	7008.56	6939.71	7125.61	6931.5	7755.5	7219.37	7306.36	7145.49	7185.11	6556.08	6819.64	7010.1
GO_REGULATION_OF_UBIQUITIN_PROTEIN_TRANSFERASE_ACTIVITY	7009.25	7263.5	7257.2	7073.5	6659.52	7135.26	6761.03	7676.64	7533.15	6701.02	6480.11	7407.87	6621.12	6945.01	6188.52
GO_POSITIVE_REGULATION_OF_ATP_METABOLIC_PROCESS	7009.22	6947.07	6758.88	7097.53	7176.22	7381.52	7096.29	6919.5	6091.13	6681.53	7140.17	7071.38	6837.25	7236.81	6560.57
GO_RIBONUCLEOSIDE_CATABOLIC_PROCESS	7007.98	6110.98	6076.73	6496.49	6088	7723.35	7540.31	8895.26	8280.72	6393.28	7519.47	9298.58	8813.23	5786.17	3311.45
GO_REGULATION_OF_RUFFLE_ASSEMBLY	7007.92	6687.94	6578.61	6674.72	6492.86	6475.04	6932.42	8886.64	8500.8	7309.94	7587.7	7083.43	6382.04	7736.24	8309.2
GO_RESPONSE_TO_HERBICIDE	7006.86	7396.43	7445.91	7123.91	6710.8	6889.82	7139.13	6741.23	6862.01	7517.77	7975.78	4227.49	4148.63	6183.24	8394.49
GO_LIPOPROTEIN_LOCALIZATION	7006.23	7395.59	7215.04	7387.32	7670.27	8305.2	7263.23	4895.86	6751.5	4388.41	5513.79	6797.42	6161.7	7653.13	4707.71
GO_DEFENSE_RESPONSE_TO_VIRUS	7005.46	6700.56	6480.32	7044.43	6762.24	7024.13	6986.8	8119.07	7743.28	6874.78	7098.47	9006.72	8824.06	6330.03	6384.84
GO_TOXIN_TRANSPORT	7005.08	6567.14	6881.19	7177.47	7049.67	7294.3	7034.45	6814.81	6875.19	7535.14	7812.61	6468.46	6559.49	7372.96	6975.71
GO_SPHINGOMYELIN_METABOLIC_PROCESS	7003.15	5427.24	6220.19	7073.69	7001.86	6547.78	7004.44	6257.63	7251.81	7203.78	7990.7	7089.12	7450.68	6195.35	4730.17
GO_MAINTENANCE_OF_LOCATION	6997.21	6830.05	7000.01	7078.23	6994.4	6820.19	6799.95	7196.49	7360.73	6958.58	6929.49	7218.32	7120.74	7033.33	6448.57
GO_NEGATIVE_REGULATION_OF_PROTEIN_EXIT_FROM_ENDOPLASMIC_RETICULUM	6994.33	7053.53	6699.53	7345.52	7495.78	6935.12	6261.81	7510.58	6454.61	7971.87	8504.24	6667.43	6915.02	7237.29	6327.93
GO_CELLULAR_RESPONSE_TO_CHEMICAL_STRESS	6993.76	6888.35	6828.97	7079.98	6907.55	6865.78	6764.85	7498.06	7337.51	7579.67	7665.94	6890.46	6761.17	7513.72	7161.25
GO_REGULATION_OF_THE_FORCE_OF_HEART_CONTRACTION	6990.98	5897.77	6323.75	6980.91	6344.06	6788.77	6877.74	8594.79	7854.6	7095.87	8163.55	7001.06	7119.12	7076.01	6207.25
GO_NEGATIVE_REGULATION_OF_CYTOKINE_PRODUCTION_INVOLVED_IN_INFLAMMATORY_RESPONSE	6990.98	6540.42	7123.35	7422.61	6811.97	7440.86	7596.17	6858.61	7379.88	6531.01	6521.76	7563.42	7334.74	6100.06	5761.61
GO_RESPONSE_TO_PEPTIDE	6989.23	6966.3	7076.18	7245.08	7026.2	6999.98	6965.2	7204.08	7256.64	6641.91	6708.17	6889.58	6866.32	7224.84	6978.48
GO_INTERLEUKIN_6_PRODUCTION	6988.29	7148.11	7034.73	7406.98	7181.76	7165.66	7269.82	6941.85	7050.87	5944.53	6772.89	6817.62	6629.82	6687.31	6553.15
GO_REGULATION_OF_PROTEIN_TARGETING	6988.13	6360.75	6625.73	6921.34	6363.51	7174.9	7153.5	7292.01	7017.33	7296.45	6794.38	6812.52	7043.13	6958.92	7781.19
GO_REGULATION_OF_PROTEIN_HOMODIMERIZATION_ACTIVITY	6987.72	7009.71	5824.42	7073.46	7094.57	6047.83	5644.29	6979.82	6523.25	8111.04	7848.69	6995.63	6739.23	7408.71	6804.11
GO_POSITIVE_REGULATION_OF_IMMUNE_RESPONSE	6987.09	7047.66	6799.48	7083.73	6828.75	6926.52	6708.69	7415.7	7360.22	5072.11	5919.96	7798.36	7687.92	7047.81	6179.13
GO_T_CELL_CHEMOTAXIS	6986.97	7444.35	7258.8	7426.58	7551.35	6456.13	6196.54	8475.77	6715.14	4338.65	6312.83	9030.47	7678.4	6116.64	4882.94
GO_RAC_PROTEIN_SIGNAL_TRANSDUCTION	6986.1	6564.22	6580.69	6544.21	6390.35	7319.39	7138.3	7616.56	7385.49	7472.2	6928.27	7141.02	6731.57	7043.93	6477.78
GO_RESPONSE_TO_ANTIBIOTIC	6985.17	6888.89	6851.37	7081.46	6751.16	6758.89	6763.03	7213.98	7150.97	7114.18	7369.65	6783.78	6613.52	7173.86	7105.92
GO_REGULATION_OF_ESTABLISHMENT_OF_PROTEIN_LOCALIZATION_TO_CHROMOSOME	6984.9	7115.43	6703.65	7055.07	6762.98	6313.83	6221.65	7489.8	6618.15	8006.3	8086.51	6914.73	6707.31	8309.9	7820.79
GO_G1_DNA_DAMAGE_CHECKPOINT	6983.6	7172.56	6856.77	7076.87	6953.78	7135.29	7013.43	7962.14	7279.69	6355.62	6109.57	7341.49	6924	6652.58	6470.95
GO_REGULATION_OF_IMMUNE_RESPONSE	6981.46	7101.3	6848.46	7156.55	6894.44	7030.99	6861.25	7423.72	7348.56	5102.61	5984.39	7721.22	7611.32	6931.94	6161.01
GO_REGULATION_OF_PHOSPHOLIPID_METABOLIC_PROCESS	6981.35	6923.61	7012.86	7060.69	7245	6548.91	6258.21	6949.85	7140.69	6218.74	6533.36	7179.13	7207.66	7664.14	5649.7
GO_REGULATION_OF_PROTEIN_CATABOLIC_PROCESS	6981.32	6767.23	6667.33	6993.49	6874.95	6881.89	6680.47	7396.77	7023.69	7163.13	7317.34	6969.14	6780.52	7270.82	7065.07
GO_PEPTIDYL_TYROSINE_AUTOPHOSPHORYLATION	6977.37	6900.29	6616.89	7235.13	6830.27	6915.29	7172.12	7852.46	8300.37	6447.29	6681.64	7443.06	7474.88	7039.46	6458.65
GO_NUCLEOSIDE_TRIPHOSPHATE_BIOSYNTHETIC_PROCESS	6976.01	7082.07	6856.29	6997.78	6721.39	6931.89	6954.24	8147.36	7253.54	7685.47	7367.3	6780.62	6373.63	7343.99	6921.51
GO_SPONGIOTROPHOBLAST_LAYER_DEVELOPMENT	6975.04	6871.38	6324.83	7482.15	7071.84	6791.86	6878.24	7685.69	7109.65	7415.72	7701.5	6743.54	6734.35	6406.47	8428.57
GO_REGULATION_OF_INFLAMMATORY_RESPONSE	6973.58	7055.26	7083.17	7309.41	7224.15	6949.42	6997.75	7115.15	7308.6	5987.58	6459.63	6878.4	6751.13	6821.93	6525
GO_LEUKOCYTE_DIFFERENTIATION	6971.7	7057.24	6825.69	7258.89	6974.95	6968.45	6888.78	7303.31	7263.86	4997.85	5636.96	7584.79	7397.11	6846.22	6097.03
GO_RESPONSE_TO_UV_C	6971.35	6940.21	6624.81	7002.5	6606.62	7032.13	6499.35	7749.71	7063	8131.82	7582.13	6749.06	6522.52	7741.63	5362.58
GO_POSITIVE_REGULATION_OF_DNA_DAMAGE_RESPONSE_SIGNAL_TRANSDUCTION_BY_P53_CLASS_MEDIATOR	6970.77	7260.92	6877.56	7076.21	7063.97	6661.33	6052.78	8364.93	7201.45	5292.18	6131.91	8267.73	7078.34	6034.43	5001.43
GO_CHAPERONE_MEDIATED_PROTEIN_COMPLEX_ASSEMBLY	6968.59	7268.98	7003.9	7520.05	7599.49	6296.57	5945.3	6933.28	6331.28	8749.04	7860.55	6715.6	6283.87	7112.79	6172.52
GO_POSITIVE_REGULATION_OF_NITRIC_OXIDE_SYNTHASE_ACTIVITY	6967.74	6251.27	7023.58	6500.5	6619.77	6154.32	6543.23	6963.95	6985.31	5231.65	7001.42	7182.88	6971.54	7580.96	7415.43
GO_DENDRITIC_CELL_DIFFERENTIATION	6966.81	7183.95	6930.73	7765.31	7456.82	6983.78	6943.34	6477.91	7038.99	4392	5869.58	7391.79	7563.12	6949.84	5834.45
GO_NEGATIVE_REGULATION_OF_TUMOR_NECROSIS_FACTOR_MEDIATED_SIGNALING_PATHWAY	6966.33	6910.81	7729.63	7373.44	6947.62	7199.81	7327.27	7009.04	6782.16	6018.71	6262.86	6407.75	6985.05	6751.17	7192.82
GO_NEGATIVE_REGULATION_OF_LEUKOCYTE_DIFFERENTIATION	6966.12	6815.45	6749.36	7381.31	6922.65	6935.38	6996.86	8230.62	8134	5859.65	6724.24	8037.83	7925.2	7006.31	6324.94
GO_REGULATION_OF_NECROTIC_CELL_DEATH	6966.1	6633.03	6820.69	7497.62	7111.51	6733.26	7134.1	7163.89	6368.34	6444.75	7298.73	7237.9	6619.91	6752.28	7731.42
GO_NEGATIVE_REGULATION_OF_IMMUNE_EFFECTOR_PROCESS	6964.77	6898.97	6433.27	6972.2	6736.84	7225.63	7299.31	7281.25	7175.47	5807.49	6529.9	7153.58	7136.5	6874.79	6957.34
GO_POSITIVE_REGULATION_OF_CELL_DEATH	6961.86	6960.53	6963.19	7200.48	6902.03	6951.98	6843.81	7572.17	7448.02	6701.85	6896.42	7165.04	7040.16	7081.36	6838.24
GO_REGULATION_OF_INTRACELLULAR_TRANSPORT	6960.97	6702.82	6674.24	6935.41	6673.14	7015.55	7002.31	7349.86	7089.07	7216.64	6986.53	6732.03	6697.73	6907.06	7057.15
GO_CORTICAL_CYTOSKELETON_ORGANIZATION	6959.6	6347.85	6386.73	6665.19	6212.2	6874.83	6927.29	8291.41	7909.09	7434.08	7015.15	6905.17	7090.73	7499.69	6991.91
GO_ELECTRON_TRANSPORT_CHAIN	6955.44	6703.57	6874.58	6846.82	6660.5	7247.88	6820.74	8046.28	6970.97	7792.23	7808.46	7357.12	6842.08	7930.94	6939.92
GO_RESPONSE_TO_SALT	6953.07	6736.63	7324.09	7221.22	7429.8	6303.75	6682.18	7160.43	6573.47	7149.61	6756.54	5883.33	5684.69	7894.91	7573.07
GO_MOVEMENT_IN_ENVIRONMENT_OF_OTHER_ORGANISM_INVOLVED_IN_SYMBIOTIC_INTERACTION	6952.26	6625.95	6649.1	6561.79	6585.94	6852.26	6673.38	7722.36	7355.74	8680.65	7670.96	6883.05	7021.46	7169.18	8118.94
GO_REGULATION_OF_CAMP_DEPENDENT_PROTEIN_KINASE_ACTIVITY	6948.52	6241.48	6969.54	6407.39	6391.19	6127.64	5973.87	7584.49	7301.62	6958.15	7319.78	7918.61	7906.35	6938.89	4593.52
GO_HISTONE_H4_K16_ACETYLATION	6948.22	6847.22	6827.19	6872.65	7092.92	7748.08	7867.27	6956.98	6878.53	7037.3	6145.91	6649.24	6939.47	6981.77	7178.23
GO_DNA_DAMAGE_RESPONSE_SIGNAL_TRANSDUCTION_BY_P53_CLASS_MEDIATOR	6947.42	7091.42	6857.71	7042.54	7037.13	7055.18	6809.69	7761.02	7315.73	6526.07	6309.78	7159.32	6752.33	6631.47	5982.8
GO_NEGATIVE_REGULATION_OF_LYMPHOCYTE_ACTIVATION	6946.09	6777.12	6714.92	7121.58	6783.09	6932.47	7010.18	7775.14	7718.43	5599.04	6459.4	7750.26	7536.53	6959.7	6340.11
GO_POSITIVE_REGULATION_OF_SUPRAMOLECULAR_FIBER_ORGANIZATION	6945.81	6905.41	6986.21	6833.21	6468.17	6559.56	6715.63	7358.07	7408.68	7479.16	7403.15	6810.53	6870.57	6992.47	7034.59
GO_RESPONSE_TO_STARVATION	6943.18	6961.06	6925.29	7172.47	7014.15	6804.76	6529.9	6988.78	7027.24	7334.44	6681.03	6594.02	6564.32	7415.8	6881.89
GO_HISTONE_UBIQUITINATION	6942.9	6686.44	6782.27	6832.6	6961.33	7068.14	6924.48	7261.37	7505.21	6744.48	6652.68	7330.36	7415.06	7373.44	6734.28
GO_NEGATIVE_REGULATION_OF_GLUCOSE_IMPORT	6942.02	6739.35	6669.74	7637.47	6961.24	7808.6	7166.37	5820.21	7695.56	5390.26	6922.8	7019.43	7301.59	6596.7	6687.94
GO_POSITIVE_REGULATION_OF_TELOMERE_MAINTENANCE	6941.51	6982.33	6983.69	6883.82	6974.11	7329.83	6908.91	7665.6	6640.32	6890.82	6581.88	7300.39	6905.84	7246.48	6615.54
GO_REGULATION_OF_INTRACELLULAR_PROTEIN_TRANSPORT	6941.03	6591.6	6585.87	7003.66	6610.42	6997.93	6898.23	7327.8	7045.55	7270.9	6989.84	6662.52	6637.28	6897.18	6983.83
GO_REGULATION_OF_PROTEIN_EXIT_FROM_ENDOPLASMIC_RETICULUM	6939.99	6552.1	6387.96	6980.69	6952.45	7006.51	6706.37	6927.54	6528.01	8134.61	8221.17	6487.97	6250.86	7177.72	7189.94
GO_TORC1_SIGNALING	6938.95	7563.18	7820.98	7589.08	7291.82	6809.72	6429.87	6816.3	7129.35	6959.51	6028.51	6708.47	6918.39	7510.91	5469.52
GO_ADAPTIVE_THERMOGENESIS	6938.93	6582.78	6562.3	7044.75	6685.73	7073.48	6905.09	6972.77	7231.08	7010.18	7097.29	6468.73	6679.82	7095.88	6702.56
GO_RNA_3_END_PROCESSING	6937.36	6920.72	6796.84	6695.09	6699.69	7190.2	6640.74	7340.3	7159.07	6926.06	6948.66	7418.93	7322.34	7096.15	6406.21
GO_RETINOIC_ACID_RECEPTOR_SIGNALING_PATHWAY	6936.69	6322.43	6385.63	6372.94	6513.79	7262.17	7204.73	7925.7	7513.54	7531.87	7089.1	5700.12	5942.86	7659.11	6784.29
GO_REGULATION_OF_PLASMA_LIPOPROTEIN_PARTICLE_LEVELS	6936.53	7027.56	6911.42	7068.6	6921.65	7240.01	7242.7	6527.01	7526.1	5576.74	6470.98	6544.17	6898.97	7863.55	6951.42
GO_POSITIVE_REGULATION_OF_STEROID_BIOSYNTHETIC_PROCESS	6936.48	7114.47	6918.92	7712.34	7522.59	6954.04	7052.48	6324.94	6519.03	7917.88	8966.74	6585.48	6445.65	6874.07	6731.51
GO_ADHESION_OF_SYMBIONT_TO_HOST	6936.35	7062.1	6438.13	8213.12	7606.08	6525.24	6002.46	7877.49	8575.7	7278.52	6808.66	6567.1	6810.61	7730.22	6276.66
GO_REGULATION_OF_ATP_METABOLIC_PROCESS	6934.01	7023.94	6844.08	7160.04	7095.65	7106.72	6809.92	7152.99	6599.83	6808.83	6623.71	7191.12	6842.76	7529.64	6808.75
GO_RESPONSE_TO_TEMPERATURE_STIMULUS	6933.43	6986.15	6866.17	7181.15	7044.02	6458.37	6447.1	6992.71	6632.08	7380.8	7106.58	6880.71	6572.58	7317.48	6632.09
GO_RNA_POLYMERASE_II_PREINITIATION_COMPLEX_ASSEMBLY	6932.02	7148.53	7474.18	7023.39	6843.56	7036.74	6339.03	7198.09	7134.33	5519.64	5825.13	6911.15	6952.89	5846.78	5938.92
GO_PROTEIN_DEMETHYLATION	6930.4	7558.65	7340.07	7471.95	7678.73	6988.34	6872.47	6046.58	6330.64	6344.8	6345.2	6503.69	6562.17	6992.03	7549.25
GO_NEGATIVE_REGULATION_OF_CYTOKINE_PRODUCTION	6929.92	6932.34	6841.08	7241.56	6963.11	6927.51	6891.33	7350.26	7396.59	5697.89	6323.64	7274.24	7294.59	6340.68	6096.03
GO_DEFENSE_RESPONSE	6929.06	6973.18	6792.59	7105.43	6917.83	6930.95	6927.18	7469.98	7321.75	5853.41	6603.34	7483.71	7303.58	6832.25	6476.39
GO_ERYTHROCYTE_DEVELOPMENT	6926.47	6975.97	6558.17	7294.75	7000.35	7384.04	7325.3	7109.39	7115.54	6199.7	5691.82	6528.52	6542.04	6763.42	6876.98
GO_MONOSACCHARIDE_BIOSYNTHETIC_PROCESS	6925.69	6621.6	7109.78	7018.3	7050.28	7425.61	6863.66	6828.8	7560.54	6836.05	6619.69	6558.21	7132.13	6987.71	6739.22
GO_REGULATION_OF_CARDIAC_MUSCLE_CONTRACTION_BY_CALCIUM_ION_SIGNALING	6920.72	6286	7042.29	6462.93	6799.15	6588.67	6620.23	7260.31	7230.15	6453.36	7074.13	7597.98	7231.61	7577.38	5418.58
GO_REGULATION_OF_T_CELL_MIGRATION	6919.78	7291.85	6950.5	7390.7	6985.05	6889.06	6783.4	7665.3	6706.21	5972.9	6952.32	7308.19	6745.24	6659.61	6106.83
GO_UBIQUITIN_DEPENDENT_PROTEIN_CATABOLIC_PROCESS_VIA_THE_MULTIVESICULAR_BODY_SORTING_PATHWAY	6919.49	7204.02	7082.27	6392	6618.47	6591.25	7027.88	6969.71	6532.68	5913.02	6067.04	7084.13	7095.27	6935.89	6903.1
GO_POSITIVE_REGULATION_OF_VASCULAR_SMOOTH_MUSCLE_CELL_PROLIFERATION	6917.29	6606.84	6913.12	7156.4	7026.06	6938.88	7205.63	6921.47	7787.63	4923.55	5970.05	6884.59	6436.56	7431.69	6134.7
GO_PROTEIN_POLYUBIQUITINATION	6914.76	6499.56	6496.36	6485.16	6348.06	6835.68	6659.4	7592.49	7017.39	7174.29	7135.88	7263.11	7012.07	6956.69	6872.82
GO_REGULATION_OF_IMMUNE_SYSTEM_PROCESS	6912.28	7049.41	6882.39	7079.49	6828.51	6910.67	6763.58	7472.57	7382	5336.27	6052.23	7461.25	7335.34	6913.88	6116.12
GO_CD4_POSITIVE_ALPHA_BETA_T_CELL_PROLIFERATION	6910.78	6061.05	6074.95	7391.64	7059.18	6872.75	7350.26	8811.88	7668.39	6286.52	7330.04	6948.81	6308.19	6775.17	6204.49
GO_TRANSCRIPTION_ELONGATION_FROM_RNA_POLYMERASE_II_PROMOTER	6908.95	6730.03	6532.91	7066.15	6853.77	7097.51	6765.49	7031.37	7081.06	6690.81	6244.47	6987.22	6964.13	7280.84	6517.98
GO_POSITIVE_REGULATION_OF_TUMOR_NECROSIS_FACTOR_SECRETION	6907.36	8273.83	8449.5	8290.34	8136.69	7258.78	7309.64	5823.38	5835.84	5713.7	6630.98	7031.82	6782.9	6545.39	6288.24
GO_RESPONSE_TO_REACTIVE_OXYGEN_SPECIES	6906.55	6898.59	6757.76	6914.51	6786.89	6647.91	6630.59	7492.09	7328.57	7004.99	7412.75	6672.65	6557.78	7156.91	7174.52
GO_SYNAPTIC_VESICLE_TRANSPORT	6905.99	6970.58	7122.84	6730.25	6883.38	8254	8069.56	6560.86	6711.57	6124.22	5260.18	7157.94	7255.18	6556.7	6928.59
GO_REGULATION_OF_GENE_SILENCING	6904.51	6884.52	6781.22	6924.51	6790.24	7125.78	6941.66	7001.53	6712.57	6723.85	6497.76	7112.94	6970.35	7471.95	6761.24
GO_TYPE_B_PANCREATIC_CELL_PROLIFERATION	6902.94	6574.9	7074.06	6731.83	5647.61	4691.33	5544.05	9077.09	8815.27	8494.52	8627.68	7337.73	6654.49	6604.91	7560.5
GO_NUCLEOSIDE_TRIPHOSPHATE_METABOLIC_PROCESS	6902.36	6881.71	6741.98	7048.6	6789.06	6923.01	6838.55	7757.6	6992.98	7228.79	7139.95	6743.8	6503.85	7255.21	6605.32
GO_EOSINOPHIL_MIGRATION	6899.37	6769.95	6605.4	7028.8	7265.26	5482.39	5496.37	7439.23	7257.35	5444.1	7215.12	8823.13	8400.93	6710.93	5248.77
GO_POSITIVE_REGULATION_OF_UBIQUITIN_PROTEIN_TRANSFERASE_ACTIVITY	6896.67	7137.03	6923.16	6870.18	6396.6	7154.16	7060.27	7765.27	8179.26	6507.84	6129.91	7258.59	6519.82	6082.51	5960.09
GO_PEPTIDE_BIOSYNTHETIC_PROCESS	6895.33	6864.32	6804.92	6926.34	6598.4	6517.62	6114.87	7371.43	6664.38	6953.64	7194.83	6943.81	6658.17	7726.75	7308.49
GO_REGULATION_OF_CELLULAR_PROTEIN_CATABOLIC_PROCESS	6892.61	6694.68	6662.42	6915.5	6717.43	6869.72	6629.29	7536.23	7033.45	7308.19	7280.12	6945.05	6849.34	7346.09	6848.25
GO_T_CELL_PROLIFERATION	6890.92	6884.38	6706.56	7142.54	6849.44	6891.34	6890.5	7612.49	7543.16	5485.88	6683.08	7457.48	7327.98	6917.45	5880.97
GO_PLASMA_LIPOPROTEIN_PARTICLE_CLEARANCE	6890.73	6916.4	6925.38	6865.05	6577.41	7261.86	7232.86	6353.21	7429.81	5883.98	6430.19	6457.86	6988.87	7820.55	6842.03
GO_POSITIVE_REGULATION_OF_PROTEIN_MODIFICATION_BY_SMALL_PROTEIN_CONJUGATION_OR_REMOVAL	6890.7	6886.27	6838.13	6918.96	6807.51	6786.85	6661.83	7468.42	7342.99	7254.4	6895.14	6948.86	6672.19	6917.52	6673.06
GO_NEGATIVE_REGULATION_OF_TRANSCRIPTION_REGULATORY_REGION_DNA_BINDING	6889.92	6997.71	7080.49	7131.74	7059.92	6482.4	6782.13	6486	6262.65	7860.18	7117.28	5241.66	5762.07	6738.98	7465.84
GO_NEGATIVE_REGULATION_BY_HOST_OF_VIRAL_PROCESS	6886.75	6687.69	6517.75	6926.83	6472.89	6642.93	6980.33	6846.66	7347.1	5519.41	7280.92	7719.52	7591.96	6154.03	7105.95
GO_CELLULAR_RESPONSE_TO_REACTIVE_OXYGEN_SPECIES	6885.25	6748.89	6552.08	6962.59	6807.91	6771.4	6635.21	7290.15	7224.31	7132	7248.04	6452.23	6488.66	7122.24	7232.05
GO_NEGATIVE_REGULATION_OF_DNA_BINDING_TRANSCRIPTION_FACTOR_ACTIVITY	6885.04	6783.82	7060.19	7118.58	6843.6	6926.49	6798.67	7587.47	7531.13	6182.64	6064.44	7072.33	6820.03	6939.28	6542.86
GO_NEGATIVE_REGULATION_OF_VIRAL_RELEASE_FROM_HOST_CELL	6884.05	5488.71	5540.56	5935.37	5257.81	6611.52	6136.62	7600.32	7293.18	7818.63	7478.49	7186.91	7156.58	6420.05	8235.92
GO_REGULATION_OF_TYPE_2_IMMUNE_RESPONSE	6883.65	6597.29	6304.98	7225.66	7136.33	6554.19	6630.97	8704.17	8270.02	6214.31	7448.43	8876.97	8613.74	6603.31	6321.59
GO_NEGATIVE_REGULATION_OF_IMMUNE_SYSTEM_PROCESS	6883.18	6872.32	6665.81	7062.13	6823.55	6894.03	6944.59	7541.7	7492.23	5692.15	6472.22	7140.51	7079.86	6771.23	6230.16
GO_REGULATION_OF_PROTEIN_DEPHOSPHORYLATION	6882.46	6835.34	6871.46	7090.46	6896.58	6893.47	6862.3	7233.61	7130.84	6907.58	6737.91	6896.46	6673.8	6842.38	6817.29
GO_CELLULAR_POLYSACCHARIDE_CATABOLIC_PROCESS	6882.19	6888.07	6671.1	6876.3	7250.24	8035.84	7913.86	6217.89	6392.92	7525.86	6912.74	6271.64	6324.44	6464.26	7984.31
GO_NEGATIVE_REGULATION_OF_RESPONSE_TO_OXIDATIVE_STRESS	6882.12	7142.63	7350.63	7066.74	6842.59	6490.78	6291.01	6921.64	6803.4	6684.39	7009.69	6719.2	6560.05	7695.06	7217.59
GO_POSITIVE_REGULATION_OF_CELL_MORPHOGENESIS_INVOLVED_IN_DIFFERENTIATION	6881.15	6637.96	6636.76	6794.14	6520.57	6826.68	6935.62	7093.67	7281.77	7101.25	7359.51	6314.95	6537.26	7009.45	7258.25
GO_POLYSACCHARIDE_CATABOLIC_PROCESS	6880.91	6920.44	6710.04	6952.57	7346.43	8107.61	8011.75	6174.09	6593.51	7432.89	6841.39	6003.04	6154.4	6437.4	8069.36
GO_PROTEIN_POLYMERIZATION	6879.97	6799.91	6559.92	6861.41	6488.18	6886.94	6879.99	7401.28	7239.98	7234.75	6879.95	6714.79	6571.79	6954.4	7217.34
GO_ANOIKIS	6877.62	6856.08	6809.07	7012.65	6254.36	6338.09	6417.61	7992.8	8004.95	5707.78	6323.26	7319.13	7276.85	7435.18	6899.16
GO_REGULATION_OF_IMMUNOGLOBULIN_PRODUCTION	6877.28	6720.68	6757.14	7340.68	7117.1	6520.65	6187.4	6997.43	7384.28	4704.56	5925.62	7371.13	7443.68	7108.14	6149.59
GO_MEMBRANE_DISASSEMBLY	6876.5	7286.82	7122.53	6925.19	6934.27	8260.3	8106.54	7154.27	6282.59	5246.86	5479.81	6827.82	6568.66	6265.67	5451.81
GO_CELLULAR_RESPONSE_TO_X_RAY	6876.24	8036.02	7748.54	7041.87	7366.17	7467.73	6630.85	6882.21	6870.28	4248.02	4785.63	7275.5	6683.96	6604.01	5749.21
GO_POSITIVE_REGULATION_OF_LEUKOCYTE_PROLIFERATION	6874.79	6905.39	6665.89	7316.2	7137.51	6844.19	6559.16	7281.72	7291.93	4716.24	6440.26	7574	7570.79	6764.09	5249.08
GO_NEGATIVE_REGULATION_OF_ERAD_PATHWAY	6874.25	6707.17	6338.16	6865.18	6985.47	6765.78	6239.38	7551.31	6883.31	7526.71	7966.62	7092.65	7392.33	6717.23	6574.28
GO_NEGATIVE_REGULATION_OF_MUSCLE_HYPERTROPHY	6872.4	6921.87	6607.74	6937.86	6668.18	6843.17	7171.48	6901.62	7093.52	7451.23	6791.13	6313.64	6018.87	6186.66	7175.21
GO_ESTABLISHMENT_OF_PROTEIN_LOCALIZATION_TO_MITOCHONDRIAL_MEMBRANE	6868.77	5208.89	5993.67	5812.55	5497.27	6479.72	5779.81	7370.59	7168.01	7475.34	7813.26	7086.23	7194.85	7421.7	6651.32
GO_REGULATION_OF_TOLL_LIKE_RECEPTOR_4_SIGNALING_PATHWAY	6867.84	7846.27	7267.61	6886.85	7605.38	6429.78	6272.51	7301.69	7356.28	6019.77	6666.21	6978.99	6848.83	5546.21	5420.66
GO_LYMPHOID_PROGENITOR_CELL_DIFFERENTIATION	6867.27	8266.41	7468.22	8119.61	8127.61	6772.66	6409.3	6979.89	6311.27	6020.16	5292.09	5662.49	5581.39	7248.27	6961.89
GO_VENOUS_BLOOD_VESSEL_DEVELOPMENT	6863.56	6137.27	7103.55	6440.86	5800.1	6081.67	5913.84	7667.48	8084.03	8332.75	7496.03	6756.2	6970.91	7340.94	5962.35
GO_RNA_PHOSPHODIESTER_BOND_HYDROLYSIS_EXONUCLEOLYTIC	6861.23	6988.87	6758.62	6740.17	6624.74	6920.84	6785.39	7316.49	6871.81	6850.64	7072.91	7359.24	7060.37	6643.58	5249.99
GO_POSITIVE_REGULATION_OF_AXONOGENESIS	6860.77	6374.05	6483.98	6837.62	6387.11	6800.5	7056.31	7224.27	7569.99	7085.72	7501.28	6574.38	6879.24	6842.3	7476.05
GO_PROTEIN_K63_LINKED_UBIQUITINATION	6859.08	6525.23	6501.05	6770.48	6682.17	6939.48	6921.16	7243.73	6759.61	6797	6788.71	7313.77	7297.18	7085.39	7411.1
GO_NEGATIVE_REGULATION_OF_LEUKOCYTE_APOPTOTIC_PROCESS	6857.7	6847.84	6661.66	7325.9	6990.62	6867.56	6670.96	7643.51	7501.42	5878.31	6234.13	7566.31	7556.96	6235.84	5413.64
GO_REGULATION_OF_T_CELL_MEDIATED_IMMUNITY	6857.66	6757.53	6415.25	7836.1	7610.54	6768.05	6757.32	6960.42	6947.28	4785.16	6259.83	7497.28	7350.23	7085.42	6311.27
GO_NEGATIVE_REGULATION_OF_REACTIVE_OXYGEN_SPECIES_METABOLIC_PROCESS	6851.95	6878.87	6992.14	7316.73	7117.32	6776.13	6546.64	6668.51	6675.78	6386.68	6997.57	6868.38	6835.52	7069.7	6652.97
GO_REGULATION_OF_MRNA_POLYADENYLATION	6850.63	6524.85	6170.24	6974.21	6518.56	7289	6748.27	6573.01	6919.86	6857.22	6470.8	6844.04	7262.26	7038.61	7546.29
GO_NEGATIVE_REGULATION_OF_INTRACELLULAR_SIGNAL_TRANSDUCTION	6850.15	6803.9	6809.24	6891.07	6667.75	6716.11	6651.55	7140.31	7132.75	6995.1	7026.25	6508.39	6344.69	7056.85	7110.33
GO_UBIQUITIN_DEPENDENT_ERAD_PATHWAY	6848.75	7006.13	7132.62	6813.38	6655.6	6856.2	6697.92	6974.52	6841.3	7275.63	7617.28	6734.44	6565.21	7375.12	6725.91
GO_REGULATION_OF_PROTEIN_CONTAINING_COMPLEX_ASSEMBLY	6848.19	7006.25	6842.51	6964.3	6697.54	6817.37	6783.63	7365.45	7194.41	6837.74	6819.54	6853.86	6780.17	6995.44	7131.42
GO_INTRACELLULAR_RECEPTOR_SIGNALING_PATHWAY	6847.16	6775.74	6653.24	6871.95	6719.3	6822.37	6743.1	7316.08	7137.48	7213.26	6957.89	6627.56	6447.72	7064.02	7022.94
GO_REGULATION_OF_LEUKOCYTE_PROLIFERATION	6843.58	6909.06	6672.12	7059.97	6827.36	6859.81	6704.19	7581.63	7499.24	5438.96	6670.57	7423.24	7315.35	6802.09	5748
GO_NEGATIVE_REGULATION_OF_DEFENSE_RESPONSE_TO_VIRUS	6843.47	6828.33	6178.14	6024.95	5854.07	7097.56	7038.82	7119.11	6995.63	6721.27	6439.53	6858.61	6955.9	6738.46	7102.12
GO_REGULATION_OF_VIRAL_INDUCED_CYTOPLASMIC_PATTERN_RECOGNITION_RECEPTOR_SIGNALING_PATHWAY	6842.65	6964.35	6153.06	6704.96	6593.54	6617.31	6779.27	7470.78	6525.23	7808.78	7258.45	6968.42	6797.03	6888.26	7039.44
GO_CELLULAR_RESPONSE_TO_IONIZING_RADIATION	6841.9	6877.92	6454.55	6805.88	6636.59	6601.24	6320.47	7533.57	7066.3	7044.2	6780.23	7464.9	6907.28	7051.62	6432.57
GO_PROTEASOMAL_PROTEIN_CATABOLIC_PROCESS	6841.7	6729.07	6764.96	6739.68	6580.74	6918.43	6702.49	7429.26	6936.37	7102.83	7111.87	6964.56	6687.09	7112.82	6605.54
GO_RESPONSE_TO_VITAMIN_D	6839.85	6905.68	6851.71	6639.9	6564.43	6827.98	7161.49	7974.31	7854.44	7283.78	8058.77	6654.56	6548.03	5765.1	6362.56
GO_CERAMIDE_METABOLIC_PROCESS	6838.81	6863.49	6859.76	6802.18	6585.39	6695.21	6733.28	7234.6	6895.92	7343.59	7411.26	6817.86	6508.97	6958.01	6180.24
GO_NEGATIVE_REGULATION_OF_CELL_JUNCTION_ASSEMBLY	6837.69	6217.36	6493.74	7404.57	6732.05	6045.34	5606.82	7792.31	8485.36	6426.02	7215.11	6943.33	6948.3	8065.37	6293.42
GO_ACTIVATION_OF_GTPASE_ACTIVITY	6836.66	6908.51	6766.52	6909.23	6791.76	6545.11	6643.41	7207.96	7186.2	7180.04	6266.26	6419.48	6407.97	6956.33	6881.56
GO_MACROPHAGE_CHEMOTAXIS	6836.3	6370.61	6621.45	6547.52	5972.28	6705.52	7048.54	8702.82	8559.48	6795.89	6886.01	7472.76	6876.72	7149.15	4943.88
GO_RESPONSE_TO_MACROPHAGE_COLONY_STIMULATING_FACTOR	6836.22	6649.79	6392.62	7139.75	6765.58	6433.76	6587.73	6923.87	7035.58	5175.33	6906.86	7895.21	7763.15	7194.8	5635.09
GO_GLYCOSPHINGOLIPID_METABOLIC_PROCESS	6836.18	7151.75	6993.81	6986.61	6840.51	6469.37	6593.63	6560.98	6831.84	7462.76	6999.68	6190.88	6068.97	7375.63	6065.47
GO_POSITIVE_REGULATION_OF_CELLULAR_RESPONSE_TO_INSULIN_STIMULUS	6836.08	7078.02	7617.55	7236.33	7458.25	7361.59	7623.38	6457.28	7268.9	6417.74	5321.21	5891.41	5909.5	6188.65	6594.14
GO_POSITIVE_REGULATION_OF_SMOOTH_MUSCLE_CELL_MIGRATION	6835.3	6404.49	6318.86	6943.48	6786.39	6869.98	6956.53	6800.62	7662.13	5850.65	6451.05	7251.11	6996.84	6939.91	5347.19
GO_NEGATIVE_REGULATION_OF_INTERFERON_BETA_PRODUCTION	6834.36	6760.89	6769.34	7085.38	6627.49	7641.38	6899.37	6963.41	6987.96	5910.69	5169.3	6951.69	7114.36	5383.65	5467.96
GO_REGULATION_OF_MITOCHONDRIAL_MEMBRANE_POTENTIAL	6831.36	6806.78	6946.22	6720.51	6806.7	6400.25	6462.25	7339.24	6863.01	6615.1	6926.11	7088.01	6855.95	6790.91	7168.52
GO_REGULATION_OF_PROTEIN_LOCALIZATION_TO_CHROMOSOME_TELOMERIC_REGION	6828.28	7035.24	6678.25	6978.3	6598.37	6038.94	5890.85	7222.12	6223.77	7747.37	7860.43	6616.94	6512.36	8120.79	7837.89
GO_REGULATION_OF_RECEPTOR_LOCALIZATION_TO_SYNAPSE	6827.54	6737.25	7498.25	6635.12	6917.83	7480.18	7040.03	7768.84	7821.27	7705	5831.95	6550.95	6525.02	6236.93	6330.01
GO_POSITIVE_REGULATION_OF_PROTEIN_OLIGOMERIZATION	6827.49	6838.62	7534.94	7046.59	6692.27	5979.81	6103.48	7919.06	6816.37	4520.4	6332.61	8009.29	7757.43	6529.74	7500.58
GO_ANGIOGENESIS_INVOLVED_IN_WOUND_HEALING	6827.26	7834.62	7127.35	7171.62	7026.75	6788.71	6185.4	6668.25	7114.65	6162.49	6865.8	6380.92	6072.24	7021.02	5927.26
GO_PROTEIN_LOCALIZATION_TO_CHROMOSOME_TELOMERIC_REGION	6826.13	6934.47	6690.97	6766.95	6885.32	6306.98	5922.56	7009.7	5884.03	7015.69	6904	6923.79	6318.67	7698.69	6520.07
GO_INTERFERON_GAMMA_PRODUCTION	6826.05	6818.68	6551.55	7094.97	7007.6	6833.41	6703.31	7957.4	7528.47	4274.2	5321.94	7520	7301.91	6632.08	4918.57
GO_MODIFICATION_OF_MORPHOLOGY_OR_PHYSIOLOGY_OF_OTHER_ORGANISM_INVOLVED_IN_SYMBIOTIC_INTERACTION	6825.79	6701.81	6649.09	6924.99	6760.59	6733.32	6737.25	7799.42	7710.22	6889.87	7121.7	6912.1	6797.47	6854.11	6267.24
GO_REGULATION_OF_TRANSCRIPTION_OF_NUCLEOLAR_LARGE_RRNA_BY_RNA_POLYMERASE_I	6821.9	6096.03	6465.64	6452.27	5686.67	6725.87	6219.42	8056.31	8467.78	5728.71	7183.05	7944.41	6917.92	8620.59	7217.62
GO_POSITIVE_REGULATION_OF_ESTABLISHMENT_OF_PROTEIN_LOCALIZATION	6821.24	6805.68	6914.01	7039.04	6836.81	6860.89	6767.89	7060.75	7131.84	6650.33	6581.89	6751.01	6636.87	7010.4	6765.33
GO_TOR_SIGNALING	6820.76	7054.59	7168.16	6940.45	6786.82	6931.29	6734.64	6854.7	6988.38	6280.62	5655.84	6558.2	6658.22	7435.63	6367
GO_POSITIVE_REGULATION_OF_ORGANELLE_ORGANIZATION	6819.82	6825.61	6866.68	6816.12	6634.65	6760.6	6696.8	7452.96	7228.56	7052.45	6821.4	6818.24	6725.63	6955.74	6742.49
GO_REGULATION_OF_PROTEIN_LOCALIZATION_TO_CELL_PERIPHERY	6818.94	6806.93	6731.63	6535.39	6325.6	6772.61	6830.95	7696.82	7434.9	6999.91	7121.26	6589.25	6615.26	7413.42	7343.08
GO_NEGATIVE_REGULATION_OF_INTRACELLULAR_STEROID_HORMONE_RECEPTOR_SIGNALING_PATHWAY	6818.28	6804.41	6858.97	6801.92	6718.94	6832.15	6797.94	6802.6	7091.16	7104.13	6466.1	7167.42	6926.42	7019.31	6036.49
GO_L_GLUTAMATE_TRANSMEMBRANE_TRANSPORT	6817.59	8793.92	8720.53	7680.48	7482.5	6501.78	6874.65	6030.98	6070.92	5915.65	5931.48	7207.07	6760.52	9309.17	4567.55
GO_MODULATION_BY_HOST_OF_VIRAL_GENOME_REPLICATION	6816.13	6081.52	5886.22	6702.49	6404.13	6576.47	6818.25	7970.75	7717.17	7252.04	8203.2	8060.24	7937.77	6814	5528.96
GO_NEUROTROPHIN_SIGNALING_PATHWAY	6813.32	6754.07	6661.15	7092.34	6478.79	7093.23	7354.49	6810.28	7721.13	6389.53	6816.36	6748.94	6743.73	6907.03	7559.26
GO_IRON_ION_HOMEOSTASIS	6813.03	6897.3	6695.52	7166.39	6823.48	7109.13	7004.45	6592.03	6737.59	6802.58	7180.64	6379.38	6071.29	6738.85	7148.73
GO_POSITIVE_REGULATION_OF_DNA_RECOMBINATION	6812.06	6693.47	6625.98	6967.57	6381.72	6930.65	6604.49	7311.82	7289.13	5313.33	5676.41	7241.49	7354.05	7447.37	5491.44
GO_REGULATION_OF_ORGANELLE_ASSEMBLY	6811.98	6841.2	6990.33	6629.24	6525.09	6948.59	6965.01	7268.52	6735.59	7786.58	7329.7	6461.27	6313.09	6782.76	6026.4
GO_CARDIOLIPIN_METABOLIC_PROCESS	6811.15	6288.99	6426.83	6964.14	5980.32	7563.96	7740.22	7591.09	6579.19	6968.34	5932.15	7192.35	6658.16	7893.55	5819.1
GO_REGULATION_OF_CELL_JUNCTION_ASSEMBLY	6810.57	6626.11	6602.22	7026.55	6577.6	6253.92	6475.69	8204.43	8080.96	7961.83	7713.94	6407.24	6253.14	7401.33	6995.03
GO_POSITIVE_REGULATION_OF_IMMUNOGLOBULIN_PRODUCTION	6808.37	6453.88	6677.24	7025.56	6939.5	6189.29	5943.5	7049.75	7477.59	4423.07	6344.19	7519.44	7744.95	7165.71	6172
GO_RESPONSE_TO_CAMP	6806.86	6658.77	6804.52	7107.9	6699.03	6220.58	6462.35	6809.2	7147.99	7176.62	7518.64	6544.64	6692.37	7048.95	7455.1
GO_RESPONSE_TO_OSMOTIC_STRESS	6804.69	6765.09	6675.47	7023.97	6808.34	6552.09	6801.05	7649.63	7371.75	7840.52	7702.27	6335.01	5868	6624.91	7453.42
GO_REGULATION_OF_CHEMOTAXIS	6802.05	6927.01	6749.82	7119.09	6854.27	6501.49	6627.81	6974.28	6963.83	5620.27	6389.35	7008.63	6622.19	7097.28	6138.11
GO_POSITIVE_REGULATION_OF_ERK1_AND_ERK2_CASCADE	6801.17	6501.8	6513.72	6968.02	6925.93	6254.44	6264.61	6846.04	7222.38	5793.79	6946.55	6945.32	6756.3	7166.68	6412.17
GO_CELLULAR_PROTEIN_CATABOLIC_PROCESS	6800.92	6618.02	6604.42	6605.39	6483.26	6850.76	6649.45	7383.92	6938.71	7044.29	7038.51	6950.04	6751.08	7063.91	6557.57
GO_NEGATIVE_REGULATION_OF_RESPONSE_TO_CYTOKINE_STIMULUS	6800.44	6783.07	6831.93	6855.18	6827.32	6890.47	6817.82	7170.84	7205.42	5285.5	5735.18	6543.12	6287.72	6368.48	6645.89
GO_RESPONSE_TO_OXIDATIVE_STRESS	6800.02	6784.4	6815.64	6830.4	6618.69	6546.74	6559.67	7397	7201.59	7096.67	7420.05	6683.52	6475.5	7262.82	6750.58
GO_REGULATION_OF_B_CELL_MEDIATED_IMMUNITY	6799.67	6720.86	6514.34	7140.21	6880.82	6967.1	6524.08	6621.43	6878.47	4533.81	5661	7279.02	7184.01	7182.66	4958.82
GO_LYMPHOCYTE_ACTIVATION_INVOLVED_IN_IMMUNE_RESPONSE	6798	6769.5	6494.86	7313.82	7077.42	6915.02	6559.98	6950.25	6826.5	4530.51	5514.73	8472.76	8060.03	6665.99	5855.13
GO_POLYOL_CATABOLIC_PROCESS	6797.77	7314.24	7381.17	7221.02	7290.35	7172.47	7501.75	6301.7	6237.94	6807.34	6463.95	6497.85	6400.05	6788.2	5745.8
GO_RECEPTOR_RECYCLING	6795.3	6516.53	6654.64	6865.98	6732.35	6951.35	6866.4	7557.3	7101.26	5524	4730.77	6492.95	6770.79	6819.82	7460.56
GO_REGULATION_OF_RESPONSE_TO_STRESS	6792.57	6935.27	6798.79	6962.21	6786.34	6765.23	6763.03	7474.42	7306.27	6576.8	6784.98	6933.57	6748.46	6943.11	6600.59
GO_NEGATIVE_REGULATION_OF_ACTIN_FILAMENT_POLYMERIZATION	6792.31	7006.1	6351.23	6532.76	6503.02	6567.99	6757.13	7120.82	6827.49	6753.62	7230.34	6899.15	6576.23	7046.06	7279.01
GO_POSITIVE_REGULATION_OF_LIPID_TRANSPORT	6790.79	7140.96	7273.57	6726.43	6588.58	6794.98	6913.41	6786.61	7220.15	6201.59	7200.67	6033.64	6567.59	7009.24	5997.01
GO_CHEMOKINE_SECRETION	6789.41	6821.72	6739.06	7913.06	7650.96	6757.11	6752.99	5927.73	6840.2	5289.49	5697.06	7362.23	7113.69	7542.83	5443.25
GO_POSITIVE_REGULATION_OF_TELOMERASE_ACTIVITY	6787.93	6809.03	6904.56	6852.79	6701.77	6680.54	6389.47	7625.71	6438.01	7492.07	6960.18	6705.36	6227.84	6766.82	7115.86
GO_PEPTIDYL_ASPARAGINE_MODIFICATION	6787.68	6798.48	6667.18	6734.72	6438.76	6776.88	5652.02	7138.4	6467.81	7895.66	8584.69	7199.77	7203.14	7308.48	5450.14
GO_POSITIVE_REGULATION_OF_OXIDOREDUCTASE_ACTIVITY	6785.68	6733.47	6978.29	6681.07	6452.74	6355.39	6419.81	7311.58	6950.91	5963.71	6807.32	6764.04	6810.12	7011.67	7525.85
GO_POSITIVE_REGULATION_OF_CELL_ACTIVATION	6785.46	6899.26	6670.26	7103.69	6789.08	6498.43	6321.32	7222.88	7228.04	3860.24	5095.23	7642.04	7621.75	6781.84	5489.73
GO_REGULATION_OF_DNA_BIOSYNTHETIC_PROCESS	6785.17	6542.42	6768.3	6973.9	6742.48	7100.17	6772.35	7399.13	6940.49	6462.44	6038.83	7042.92	6851.33	6798	6179.27
GO_POSITIVE_REGULATION_OF_CELLULAR_PROTEIN_LOCALIZATION	6782.65	6660.96	6598.58	6836.66	6464.56	6746.15	6642.86	7527.17	7263.75	6896.98	6910.2	6797.12	6768.17	6951.91	6766.11
GO_ERROR_FREE_TRANSLESION_SYNTHESIS	6780.83	6485.4	6448.23	6599.26	5942.19	6933.05	6228.3	8056.57	6739.47	8020.8	7568.52	7506.11	6822.2	7664.98	5991.54
GO_POSITIVE_REGULATION_OF_CELL_GROWTH	6779.88	6775.28	6702.62	6784.47	6530.95	6614.14	6676.3	7011.29	6866.34	7030.14	7102.81	6186.86	6135.18	7001.13	7080.15
GO_REGULATION_OF_TOR_SIGNALING	6778.38	7138.37	7283.15	6872.41	6799.95	6899.2	6756.81	6662.22	6856.96	6382.61	5676.61	6196.34	6281.92	7406.52	6095.36
GO_CELLULAR_TRANSITION_METAL_ION_HOMEOSTASIS	6776.47	6689.59	6579.67	7048.39	6770.1	7052.35	6797.5	7299.23	7152.79	6317.86	6707.47	6975.93	6741.4	6782.85	6351.78
GO_REGULATION_OF_RNA_POLYMERASE_II_TRANSCRIPTIONAL_PREINITIATION_COMPLEX_ASSEMBLY	6774.88	7026.14	7561.9	7306.2	6936.71	6344.69	5286.49	7350.19	7063.93	5006.31	5949.16	6659.5	6679.61	6398.68	6870.16
GO_VESICLE_MEDIATED_TRANSPORT_TO_THE_PLASMA_MEMBRANE	6769.18	6370.86	6485.64	6470.06	6245.23	6679.84	6648.03	7437.32	7103.91	7420.53	6781.47	7153.2	6946.89	6756.89	6835.08
GO_NEGATIVE_REGULATION_OF_PROTEIN_CATABOLIC_PROCESS	6768.92	6539.23	6458.12	6953.64	6828.06	6639.45	6373.92	7409.33	6772.64	6923.09	7314.11	6742.16	6543.18	7150.82	6765.21
GO_APOPTOTIC_MITOCHONDRIAL_CHANGES	6767.32	6613.81	6656.28	6762.65	6373.9	6730.06	6439.68	7602.51	7288.58	7539.46	7639.8	6771.99	6685.73	7108.11	6891.19
GO_REGULATION_OF_LYMPHOCYTE_MEDIATED_IMMUNITY	6765.49	6727.44	6336.07	7216.76	6814.96	6857.51	6629.4	6803.54	6864.45	3866.9	5230.35	7143.97	6989.74	6416.32	5001.31
GO_NEGATIVE_REGULATION_OF_PROTEIN_BINDING	6763	6731.19	6680.14	7394.53	7105.02	6779.46	6647.98	7210.87	7280.67	6409.51	6506.35	7021.44	6877.67	6746.54	6633.6
GO_RESPONSE_TO_PROGESTERONE	6762.84	6492.82	6097.23	7019.62	6689.03	6147.71	6273.41	8054.14	7884.53	6792.31	7121.08	7107.89	6797.49	6724.7	6733.36
GO_REGULATION_OF_PROTEOLYSIS	6762.22	6564.71	6598.16	6885.52	6653.95	6627.55	6634.3	7303.09	6878.86	6870.48	6876.17	6423.83	6201.53	7094.13	7023.07
GO_CELLULAR_RESPONSE_TO_EXTERNAL_STIMULUS	6760.37	6731.99	6835.7	6896.33	6771.73	6677.79	6561.95	6838.78	6877.62	7100.27	6749	6518.21	6473.86	6945.45	6636.88
GO_TELOMERE_MAINTENANCE_VIA_TELOMERE_LENGTHENING	6760.27	6595.77	6518.35	6823.38	6759.92	6931.55	6786.83	7419.95	6731.7	6549.62	6204.65	7233.13	6760.62	7046.08	6417.82
GO_PROTEIN_HETEROOLIGOMERIZATION	6760.1	6575.2	6411.13	6858.71	6358.71	6301.5	6670.68	7139.04	6857.64	7060.27	7166.45	6364.97	6446.24	6849.51	7597.12
GO_REGULATION_OF_RECEPTOR_RECYCLING	6759.96	6378.41	6665.49	6762.41	6762.14	6479.02	6294.32	7589.81	6984.8	5125.28	4327.15	6757.79	7001.81	6845.31	7109.95
GO_REGULATION_OF_LIPID_KINASE_ACTIVITY	6759.16	6677.95	6545.01	6858.46	6856.72	6253.66	6163.86	6931.15	6840.38	5980.55	6156.29	7466.91	7092.98	7201.66	5896.87
GO_ACROSOME_ASSEMBLY	6756.73	5693.32	6517.45	6727.91	7135.65	7347.28	7842.71	7348.96	6785.55	6645.92	5449.8	8561.51	8763.01	3795.07	5431.17
GO_REGULATION_OF_NATURAL_KILLER_CELL_MEDIATED_IMMUNITY	6756.31	7046.47	6521.87	6713.97	5892.42	7370.74	6798.65	7828.71	7244.88	2457.17	3784.11	7338.56	7298.98	4908.69	3489.45
GO_ORGANELLE_FUSION	6756.3	6908.99	6824.69	6715.76	6777.28	7154.5	7119.44	6805.24	6565.01	6209.71	5982.24	6755.19	6735.14	6757.41	6094.67
GO_NEGATIVE_REGULATION_OF_PROTEOLYSIS_INVOLVED_IN_CELLULAR_PROTEIN_CATABOLIC_PROCESS	6755.3	6755.79	6617.04	7135.05	6910.8	6653.1	6273.02	7564.07	6655.34	6955.56	7461.38	6754.8	6736.13	7029.36	6641.59
GO_POSITIVE_REGULATION_OF_LYMPHOCYTE_MEDIATED_IMMUNITY	6754.78	6912.34	6584.1	7248.46	6906.25	6349.87	6126.83	6725.12	6784.45	3604.05	5091.73	7161.73	7077.93	6958.09	4909.42
GO_NUCLEAR_TRANSPORT	6754.74	6759.85	6690.09	6956.94	6671.08	6918.06	6608.7	7033.57	6749.63	6983.43	6589.42	6775.85	6635.17	7057.58	6512.17
GO_TEMPERATURE_HOMEOSTASIS	6753.48	6586.21	6600.41	7036.95	6673.9	6814.71	6697.41	6809.55	7047.06	7005.6	7298.12	6394.46	6529.11	7148.77	6555.32
GO_PROTEIN_CATABOLIC_PROCESS	6750.1	6625.66	6595.82	6658.28	6556.02	6796.16	6627.45	7328.66	6973.28	6907.17	6993.25	6933.03	6704.04	7055.85	6678.11
GO_PLATELET_AGGREGATION	6750.02	7142.67	6823.3	6769.71	6658.01	6503.58	6544.39	6730.34	6962.66	5460.12	5989.6	6579.76	6812.7	7213.04	6934.92
GO_PROTEIN_LIPID_COMPLEX_SUBUNIT_ORGANIZATION	6749.92	7294.4	7136.02	7191.42	7076.66	6493.82	6701.48	6281.02	7641.89	3928.08	5904.45	6190.95	6798.37	8095.07	6478.69
GO_POSITIVE_REGULATION_OF_BINDING	6748.87	6712.22	6785.52	6855.42	6659.32	6709.95	6376.6	7002.48	7029.36	6261.78	6447.38	7013.98	7073.33	6968.04	6540.88
GO_ENDOMEMBRANE_SYSTEM_ORGANIZATION	6747.36	6688.26	6784.07	6559.23	6430.28	7056.76	6998.23	7290.88	6996.14	6669.67	6624.22	6890.39	6710.65	6804.74	6634.77
GO_NEGATIVE_REGULATION_OF_TYPE_I_INTERFERON_MEDIATED_SIGNALING_PATHWAY	6746.86	6664.46	6745.26	7161.74	7620.91	7570.31	7942.12	6390.59	6824.64	4846.81	6491.18	6661.62	6725.97	7415.19	6748.46
GO_NUCLEOTIDE_EXCISION_REPAIR_DNA_DUPLEX_UNWINDING	6745.75	6623.67	6534.41	6675.9	6799.96	7115.48	7059.48	6920.1	6691.54	7857.29	6518.77	6339.92	6100.8	7901.48	7485.01
GO_POSITIVE_REGULATION_OF_DOUBLE_STRAND_BREAK_REPAIR_VIA_NONHOMOLOGOUS_END_JOINING	6744.17	6241.74	5210.65	6784.72	6703.63	6356.38	6661.1	6868.36	6335.03	7621.51	6784.77	6964.73	6855.49	6936.73	5896.53
GO_PROTEIN_ADP_RIBOSYLATION	6742.61	6812.08	6597.75	6995.98	6723.02	6762.2	6192.38	7738.1	7228.42	5664.27	6361.51	7757.21	7438.3	6382.35	6312.71
GO_PROTEIN_AUTOPHOSPHORYLATION	6742.6	6826.54	6624.16	6934.81	6742.98	6935.89	6880.76	7243.72	7284.97	6180.07	5962	6727.6	6713.69	6742.22	6144.98
GO_REGULATION_OF_PROTEIN_LOCALIZATION_TO_MEMBRANE	6741.75	6639.19	6685.98	6641.16	6328.28	6738.55	6739.19	7691.68	7554.21	7150.23	7211.69	6637.8	6744.3	7287.12	7294.38
GO_ERAD_PATHWAY	6741.17	6810.65	6937.15	6737.31	6539.06	6745.04	6642.86	6604.25	6682.05	6927.86	7388.32	6629.15	6527.42	7267.97	6818.29
GO_RESPONSE_TO_ISCHEMIA	6739.42	6673.64	6672.83	6962.55	6680.61	6434.78	6395.04	7037.28	6966.84	6658.63	7342.69	6766.55	6712.29	7163.8	7183.48
GO_IMMUNE_SYSTEM_DEVELOPMENT	6738.73	6741.32	6580.8	6896.91	6666.37	6747.56	6589.14	7372.17	7164.04	5590.16	6074.7	7302.49	7064.35	6736.15	6201.3
GO_NUCLEOBASE_CONTAINING_COMPOUND_TRANSPORT	6737.12	6670.52	6583.49	6689.79	6599.87	6784.44	6373.39	6830.13	6825.26	6814.59	6448.48	7006.53	6797.19	7272.47	6475.37
GO_REGULATION_OF_TELOMERE_MAINTENANCE_VIA_TELOMERE_LENGTHENING	6735.97	6412.92	6613.93	6819.12	6705.08	7153.52	6928.45	7484.65	6584.99	6458.25	5949.01	7202.08	6766.86	6932.3	6036.39
GO_CELLULAR_RESPONSE_TO_EPINEPHRINE_STIMULUS	6735.25	6376.57	6376.54	7174.28	7067.54	6916.93	7255.19	6017.24	6261.34	6561.95	5692.78	7039.84	6908.54	6302.28	7413.26
GO_POSITIVE_REGULATION_OF_EPITHELIAL_CELL_APOPTOTIC_PROCESS	6735.22	6184.52	6172.38	7027.5	6666.96	6864.21	6536.13	6803.48	7230.58	4912.27	6154.24	6958.26	7238.62	7052.71	6330.8
GO_RETROGRADE_VESICLE_MEDIATED_TRANSPORT_GOLGI_TO_ENDOPLASMIC_RETICULUM	6734.72	6564.57	6433.86	6543.98	6327.5	7216.51	6891.32	7203.47	6706.95	6665.53	6618.39	6893.04	6762.49	7381.36	7069.88
GO_REGULATION_OF_HISTONE_METHYLATION	6733.5	6814.24	6664.82	6823.38	6715.48	6899.8	6393.49	6791.78	7055.51	5521.13	5725	6751.52	6790.54	6372.02	5974.77
GO_NEGATIVE_REGULATION_OF_INTRINSIC_APOPTOTIC_SIGNALING_PATHWAY_IN_RESPONSE_TO_DNA_DAMAGE	6732.3	6820.96	6993.75	6666.11	6662.44	6497.42	6475.65	6748.02	6633.84	7570.47	8146.72	6763.64	6716.59	7077.93	5789.52
GO_RESPONSE_TO_SALT_STRESS	6732.22	6519.04	6199.39	7296.96	6619.47	6360.94	6445.33	7454.48	7327.01	7872.21	7347.89	6257.97	5646.3	6844.98	7590.08
GO_IMP_METABOLIC_PROCESS	6731.29	7334.39	6973.65	7621.38	8108.18	7206.13	7423.8	5782.41	7650.99	6157.99	4979.9	6317.7	5574.19	6488.93	6471.41
GO_REGULATION_OF_APOPTOTIC_CELL_CLEARANCE	6729.51	5242.33	6214.13	6937.36	5569.77	6056.02	6251.29	9267.21	8868.1	6796.21	7313.85	7148.26	7444.61	6662.82	4530.72
GO_POSITIVE_REGULATION_OF_SMOOTH_MUSCLE_CELL_PROLIFERATION	6722.32	6571.66	6603.75	7057.05	6921.18	6208.16	6428.35	7224.13	7657.5	6583.86	7153.65	6840.9	6531.81	7354.25	6247.83
GO_STRESS_ACTIVATED_PROTEIN_KINASE_SIGNALING_CASCADE	6719.51	6767.18	6714.53	6935.64	6724.49	6471.94	6645.68	7278.2	7126.46	6589.6	6680.42	6612.43	6562.84	6804.93	7121.99
GO_MODIFICATION_DEPENDENT_MACROMOLECULE_CATABOLIC_PROCESS	6716.91	6669.61	6640.33	6557.93	6461.48	6764.21	6559.72	7236.74	6825.15	6979.63	6867.48	6825.21	6598.44	6941.27	6483.38
GO_REGULATION_OF_NEURON_PROJECTION_ARBORIZATION	6716.27	5330.31	5801.32	5751.55	5902.7	4766.7	5293.79	6720.22	7220.69	6959.11	7342.68	7701.12	8025.38	7215.98	6712.32
GO_REGULATION_OF_PHOSPHOPROTEIN_PHOSPHATASE_ACTIVITY	6716.13	6677.88	6666.14	6948.82	6773.64	6645.6	6705.49	7205.42	6904.5	7176.67	6695.26	6646.47	6331.52	6726.77	6772.87
GO_POSITIVE_REGULATION_OF_PROTEIN_LOCALIZATION_TO_NUCLEUS	6715.66	6938.26	6682.39	7236.31	6867.61	6612.58	6443.81	7547.66	7382.13	6295.48	6544.55	6969.1	6748.93	6542.65	6535.89
GO_REGULATION_OF_GLUCAN_BIOSYNTHETIC_PROCESS	6715.06	6551.77	6975.06	6688.07	6316.45	6610.58	6909.03	6420.74	6742.06	6878.21	7249.14	6269.57	6482.75	7144.66	6842.88
GO_MATERNAL_PROCESS_INVOLVED_IN_FEMALE_PREGNANCY	6712.18	6456.94	6717.64	6757.47	6725.91	6273.4	6143.81	7198.38	7262.05	6102.97	6798.93	5725.35	5553	6706.72	7326.09
GO_POSITIVE_REGULATION_OF_EPITHELIAL_CELL_MIGRATION	6712.04	6757.25	6805.84	6951.18	6786.91	6415.41	6363.29	6943.27	7187.59	5580.49	6371.58	6542.88	6666.83	7147.54	6666.21
GO_REGULATION_OF_ISOTYPE_SWITCHING	6711.57	6319.69	6140.88	7097.46	6637.47	6785.66	6227.04	7204.6	7277.79	4449.68	5073.64	7382.15	7591.99	7202.65	4520.25
GO_MACROMOLECULE_DEACYLATION	6705.99	6433.35	6576.04	6928.23	6657.42	6939.1	7176.16	6959.85	6754.55	6353.83	6086.3	6638.99	6416.8	6883.83	7176.14
GO_POSITIVE_REGULATION_OF_BONE_RESORPTION	6704.95	6614.68	6320.84	6748.04	6263.05	6721.99	6843.24	6687.91	6868.66	5845.56	7582.38	6080.3	5949.06	7143.39	7658.97
GO_POSITIVE_REGULATION_OF_REGULATED_SECRETORY_PATHWAY	6704.7	6628.99	6763.28	6854.27	6828.58	7468.8	7624.47	6801.72	7180.71	6373.01	5673.27	5543.55	5961.19	5991.65	6646.12
GO_PIGMENT_ACCUMULATION	6704.63	6231.85	6559.54	5679.39	5760.59	6979.4	7078.28	7880.35	7048.19	7940.92	8137.8	6217.22	6683.67	6725.59	6271.78
GO_INTERACTION_WITH_SYMBIONT	6704.43	6539.02	6524.37	6750.53	6710.15	6450.23	6393.94	7409.27	7370.7	6837.43	6978.58	6400.71	6292.29	6817.89	6698.71
GO_POSITIVE_REGULATION_OF_CYTOSKELETON_ORGANIZATION	6702.73	6652.01	6714.12	6587.28	6244.1	6321.19	6455.1	7270.24	7097.03	7302.54	6904.87	6683.42	6691.35	6719.02	6758.09
GO_NEGATIVE_REGULATION_OF_PROTEIN_CONTAINING_COMPLEX_ASSEMBLY	6699.29	6811.21	6347.66	6825.82	6662.45	6606.77	6653.6	6997.12	6888.98	6395.15	6642.24	6733.58	6664.99	6890.02	7302.07
GO_REGULATION_OF_CELL_CELL_ADHESION	6698.27	6749.37	6690.22	6967.87	6706.33	6310.46	6307.49	7368.1	7373.69	5380.28	6061.16	7040.23	6826.53	6530.32	5769.35
GO_NEGATIVE_REGULATION_OF_HISTONE_MODIFICATION	6696.58	6933.23	6621.11	7172.88	6988	6275.75	6375.66	6772.04	7028.38	5996.57	6355.69	6438.92	6579.8	7231.63	7106.41
GO_NEGATIVE_REGULATION_OF_LEUKOCYTE_PROLIFERATION	6695.58	6315.27	6223.06	6442.25	6172.17	6649.45	6741.72	7914.74	7545.12	5916.76	6965.22	7021.13	6783.65	6784.28	6146.11
GO_NEURON_DEATH	6695.03	6697.39	6692.67	6802.14	6616.6	6449.84	6403.5	7071.01	7091.05	6769.34	6703.17	6494.62	6459.25	6860.87	6684.96
GO_REGULATION_OF_CELL_SUBSTRATE_JUNCTION_ASSEMBLY	6692.45	6381.72	6348.19	6902.28	6482.62	5944.69	6000.74	7476.64	7595.48	7710.77	7337.43	6258.48	6076.76	7463.12	6992.98
GO_POSITIVE_REGULATION_OF_INTERLEUKIN_8_BIOSYNTHETIC_PROCESS	6687.71	8192.16	7677.21	8123.47	8037.16	6632.48	6742.95	4591.74	6104.06	4351.66	5692.15	7068.06	7361.19	6483.63	6600.46
GO_RESPONSE_TO_STEROL	6684.39	6280.27	6676.87	6603.55	5926.45	6953.36	7040.3	7024.59	7713.23	6647.49	6392.04	6866.71	6691.92	6798.14	6423.42
GO_CELLULAR_RESPONSE_TO_CORTICOSTEROID_STIMULUS	6683	6705.04	6541.5	6868.98	6634.95	6471.45	6660.96	6882.37	6766.71	7102.08	6495.47	6483.1	6304.85	7294.86	7705
GO_PEPTIDYL_LYSINE_TRIMETHYLATION	6681.47	7121.7	7060.65	6790.97	7046.1	7182.62	6881.49	6376.68	6764.53	6598.41	6052.76	6264.42	6348.77	6214.39	6470.92
GO_PEPTIDE_METABOLIC_PROCESS	6680.46	6674.22	6611.54	6804.02	6454.8	6516.26	6124.83	7219.74	6645.47	6921.89	7178.62	6686.71	6452.22	7683.53	7089.24
GO_T_CELL_TOLERANCE_INDUCTION	6677.77	5115.89	3551.23	6939.9	6960.93	7105.72	6432.12	8801.64	7856	691.568	2296.29	7398.28	6860.26	6495.28	1825.38
GO_NEGATIVE_REGULATION_OF_FIBROBLAST_PROLIFERATION	6677.47	6514.42	6509.85	6855.86	6529.46	6620.56	6371.69	7906.22	7699.01	7348.69	6418.91	6734.37	6794.12	6866.54	6101.46
GO_POSITIVE_REGULATION_OF_LIPID_BIOSYNTHETIC_PROCESS	6676.49	6576.91	6825.62	7202.28	7068.18	6590.66	6690.27	6139.76	6662.72	7014.24	7557.16	6091.76	6207.78	7129.66	6554.29
GO_POSITIVE_REGULATION_OF_MYOTUBE_DIFFERENTIATION	6676.48	6974.99	7362.61	6785.79	6423.7	7293.79	7855.92	7113.86	7017.41	5798.24	6567.17	6258.35	6371.4	6289.92	5969.79
GO_REGULATION_OF_PEPTIDASE_ACTIVITY	6669.89	6443.03	6485.32	6762.92	6540.57	6541.55	6676.16	7062.24	6729.16	6663.62	6772.77	6205.82	5947.96	7075.48	7075.01
GO_MITOCHONDRIAL_OUTER_MEMBRANE_PERMEABILIZATION	6668.74	6428.57	6623.73	6211.5	6166.67	6242.24	5765.35	7824.55	7519.77	7441.86	7569.31	6797.85	6556.19	7142.25	6713.74
GO_CELLULAR_RESPONSE_TO_MANGANESE_ION	6668.54	6715.52	6606.18	7315.91	6929.61	6089.65	6066.61	3878.13	6372.95	6816.07	8085.51	6602.36	6948.25	6621.57	7894.86
GO_EPIDERMAL_GROWTH_FACTOR_RECEPTOR_SIGNALING_PATHWAY	6667.52	6585.6	6668.33	6796.05	6306.55	6310.67	6464.84	7825.88	7226.92	7346.59	7451.2	6539.61	6534.93	6666.71	7626.97
GO_CYTOKINETIC_PROCESS	6664.49	6599.24	6453.66	6300.41	6116.18	6796.93	7018.23	7756.2	7159.77	6729.74	6505.63	6959.85	6562.87	6753.74	6168.99
GO_NEGATIVE_REGULATION_OF_ANION_TRANSMEMBRANE_TRANSPORT	6663.31	5933.17	5912.19	7237.57	6742.02	5870.43	6128.49	6775.44	6845.09	5944.36	5843	6642.73	6683.88	7007.16	6756.58
GO_POSITIVE_REGULATION_OF_ENDOCYTOSIS	6661.62	6329.55	6024.22	6812.55	6510.92	6664.06	6790.36	6659.19	7046.1	6302.99	6751.89	6460.97	6520.49	7172.36	7025.89
GO_REGULATION_OF_VESICLE_MEDIATED_TRANSPORT	6661.39	6538.5	6441.31	6860.6	6530.89	6862.86	6891.16	6821.11	7000.61	6380.18	6689.58	6397.92	6434.76	6633.19	6824.4
GO_CENTRAL_NERVOUS_SYSTEM_NEURON_AXONOGENESIS	6659.8	6193.59	6032.93	6830.25	6489.34	6093.66	6066.65	7979.01	6844.53	7303.85	7028.85	5502.37	5822.46	7288.62	7362.55
GO_NEGATIVE_REGULATION_OF_METALLOPEPTIDASE_ACTIVITY	6659.04	6461.15	6557.84	8358.58	7790.56	7758.18	8007.64	5988.43	6388.07	5256.12	6760.24	6402.19	6162.25	8823.67	8997.72
GO_REGULATION_OF_TRIGLYCERIDE_BIOSYNTHETIC_PROCESS	6658.57	6829.05	7291.35	7227.55	6803.93	7273.35	6907.49	5272.3	6513.22	5141.19	6134.5	4915.23	6042.94	6872.06	5296.01
GO_REGULATION_OF_CELLULAR_KETONE_METABOLIC_PROCESS	6658.54	6618.3	6781.57	6580.02	6350.72	6492.11	6275.75	6751.03	6790.78	6913.99	7129.56	6491.07	6609.45	7227.21	6698.78
GO_REGULATION_OF_CELL_DEATH	6654.74	6647.46	6662.01	6822.82	6563.1	6452.62	6367.56	7345.86	7136.38	6735.95	6834.3	6638.81	6485.67	6929.46	6572.24
GO_POSITIVE_REGULATION_OF_GLYCOLYTIC_PROCESS	6654.19	6323.53	6259.04	6408.66	6666.65	7100.8	6839.98	6265.44	6641.72	6258.85	7060.21	7046.59	7445.72	6980.59	5951.54
GO_REGULATION_OF_PLASMINOGEN_ACTIVATION	6651.06	7144.59	7289.65	6763.2	6797.94	5817.9	6092.5	6832.22	6538.93	4546.98	6197.67	6096.67	6090.71	7556.58	8230.85
GO_POSITIVE_REGULATION_OF_CALCIUM_MEDIATED_SIGNALING	6646.42	6527.52	6525.96	7312.07	7271.05	6073.97	5806.49	7637.86	7277.91	4392.91	6180.32	6867	6765.33	7571.49	6502.83
GO_GTP_METABOLIC_PROCESS	6645.17	6529.34	6219.39	7055.84	6466.86	6742.65	6854.32	7992.25	7002.16	6923.63	6819.87	6290.82	6547.69	6540.07	6315.9
GO_NEGATIVE_REGULATION_OF_T_CELL_DIFFERENTIATION	6642.89	5910.93	5996.21	6737.91	6122.79	6679.41	6606.38	8121.19	7968.7	5626.58	6723.9	8195.16	8125.02	6383.37	6081.15
GO_REGULATION_OF_PROTEIN_LOCALIZATION_TO_CELL_SURFACE	6641.9	6199.39	6066.86	6841.51	6310.68	6719.97	6562.72	7293.7	6793.14	7983.65	7333.27	6367.8	6485.66	6750.03	6563.83
GO_REGULATION_OF_CELLULAR_AMIDE_METABOLIC_PROCESS	6641.44	6717.41	6718.38	6809.46	6492.68	6482.49	6379.68	6803.01	6625.37	6248.54	6387.91	6704.97	6657.51	7046.38	6568.07
GO_SCF_DEPENDENT_PROTEASOMAL_UBIQUITIN_DEPENDENT_PROTEIN_CATABOLIC_PROCESS	6641.12	5822.24	5774.15	5607.7	5685.85	6505.14	6170.33	7701.32	6900.91	6814.57	7115.41	6777.09	6428	7233.44	7026.06
GO_REGULATION_OF_EPIDERMAL_GROWTH_FACTOR_ACTIVATED_RECEPTOR_ACTIVITY	6640.34	7166.54	7097.51	6595.33	6329.52	6387.46	6217.06	7029.55	6498.32	6447.77	6531.89	6685.36	6818.33	7008.12	7774.96
GO_LYMPHOCYTE_DIFFERENTIATION	6639.92	6741.17	6473.7	6914.62	6656.17	6623.67	6467.23	6925.92	6876.02	4115.77	4849.53	7595.04	7323.92	6356.38	5465.53
GO_POSITIVE_REGULATION_OF_HYDROLASE_ACTIVITY	6638.35	6587.44	6541.79	6868.04	6600.16	6723.86	6676.54	6905.42	7031.89	6564.23	6486.27	6689.14	6590.66	6880.05	6592.26
GO_NUCLEOTIDE_EXCISION_REPAIR_PREINCISION_COMPLEX_ASSEMBLY	6636.31	6632.22	6210.84	6693.03	6635.31	6774.36	6474.53	6851.09	6634.63	7693.68	6637.32	6224.98	6109.91	7792.18	7064.25
GO_SERTOLI_CELL_DIFFERENTIATION	6634.96	7054.59	7085.78	6539.67	6878.8	6237.01	6730.26	6862.16	7773.89	6537.83	5703.75	5914.2	5848.66	6100.62	7060.77
GO_CELLULAR_RESPONSE_TO_INTERFERON_BETA	6633.75	6030.39	5257.6	6706.77	6560.73	6736.04	6490.71	8529.61	8146.71	5540.5	7364.09	8784.85	8348.08	5391.85	6386.41
GO_MUSCLE_CELL_APOPTOTIC_PROCESS	6632.54	6937.7	7326.05	6779.28	6664.01	6842.15	7024.66	6275.45	6601.07	5958.05	5589.64	6480.52	6693.17	6268.61	6289.17
GO_AMIDE_BIOSYNTHETIC_PROCESS	6629.25	6582.62	6561.13	6675.89	6308.12	6336.68	5982.09	7117.35	6485.45	6728.43	6918.97	6707.78	6379.04	7450.24	7019.52
GO_NEGATIVE_REGULATION_OF_PROTEIN_MODIFICATION_PROCESS	6629.25	6573.72	6690.71	6714.05	6438.81	6463.92	6483.88	7078.24	6945.04	6656.55	6601.95	6391.26	6323.89	6702.7	6995.4
GO_LEUKOCYTE_MEDIATED_CYTOTOXICITY	6628.74	6849.22	6454.8	7304.73	6668.09	6749.43	6621.32	7021.1	6887.89	3846.6	5087.03	6636.17	6508.74	6257.51	5231.52
GO_T_CELL_ACTIVATION_INVOLVED_IN_IMMUNE_RESPONSE	6627.63	6527.07	6178.08	7120.92	7003.96	6715.64	6485.57	6990.58	6825.5	4485.29	5772.92	9035.7	8700.5	6539.61	6206.43
GO_CELLULAR_MACROMOLECULE_LOCALIZATION	6625.86	6575.61	6531.98	6621.8	6312.55	6621.97	6424.05	7586.6	7121.35	7483.3	7323.07	6629.75	6481.57	7147.71	7013.96
GO_REGULATION_OF_PROTEIN_BINDING	6623.1	6554.89	6430.85	6925.68	6660.24	6464.95	6277.88	6917.87	6956.26	6574.85	6666.74	6628.62	6617.58	6683.59	6560.72
GO_REGULATION_OF_NUCLEOCYTOPLASMIC_TRANSPORT	6622.82	6591.12	6356.13	6981.07	6618.28	6699.38	6627.26	7146.49	6868.62	6832.57	6618.39	6560.68	6426.92	6733.9	6135.01
GO_COLLATERAL_SPROUTING	6622.72	6724.46	6810.67	6150.6	6488.81	6974.17	7325.97	6573.61	6681.94	6310.14	6218.08	5492.43	5578.16	6679.3	6671.83
GO_NEGATIVE_REGULATION_OF_CELL_DEATH	6622.49	6613.03	6631.95	6760.14	6540.09	6252.67	6214.02	7270.7	7036.85	6746	6793.62	6464.28	6303.11	6908.52	6546.14
GO_POSITIVE_REGULATION_OF_ACTIN_NUCLEATION	6621.75	6419.18	6402.34	5923.24	5389.23	5915.93	6193.65	7044.78	7440.37	6611.75	6631.75	6867.46	7196.64	7099.96	7296.82
GO_POSITIVE_REGULATION_OF_RUFFLE_ASSEMBLY	6619.27	5982.92	6801.8	6115.92	6284.18	6436.73	7342.46	8035.72	7470.36	6255.18	6996.2	6217.62	5135.09	7599.83	8699.2
GO_HEMATOPOIETIC_PROGENITOR_CELL_DIFFERENTIATION	6616.33	6418.33	6332.97	6409.34	6318.21	6337.03	6106.46	7604.14	7036.73	6794.5	7015.86	6858.75	6601.23	6631.43	6656.91
GO_REGULATION_OF_CELL_PROLIFERATION_INVOLVED_IN_KIDNEY_DEVELOPMENT	6615.74	6965.77	6727.33	7203.94	7189.16	6390.34	6271.4	7505.66	6803.53	6629.21	5780.05	5899.13	6602.27	6583.23	6485.07
GO_HISTONE_MONOUBIQUITINATION	6614.98	6301.52	6426.31	6248.53	6417.1	6637.48	6258.54	7030.8	7331.68	6107.73	6592.47	7025.69	7157.98	6902.18	6689.14
GO_NEGATIVE_REGULATION_OF_VIRAL_INDUCED_CYTOPLASMIC_PATTERN_RECOGNITION_RECEPTOR_SIGNALING_PATHWAY	6614.17	6557.76	5507.16	6163.66	6125.12	6739.47	7158.81	7787.94	6670.58	7882.61	7371.45	6408.3	6450.27	6521.25	7140.69
GO_NUCLEOTIDE_EXCISION_REPAIR_DNA_GAP_FILLING	6613.95	5956.69	5961.61	6595.46	5521.64	6651.05	5749.02	7625.46	6590.18	7250.21	6847.9	7064.04	6639.04	6632.44	6080.46
GO_RIBOSOMAL_SMALL_SUBUNIT_BIOGENESIS	6612.75	6691.85	6743.36	6384.78	5948.93	6517.54	5316.12	7456.08	6533.65	6753.55	7245.48	6437.99	6183.72	7782.21	6810.02
GO_ESTABLISHMENT_OF_ENDOTHELIAL_INTESTINAL_BARRIER	6611.9	6226.14	5885.01	7221.29	6997.67	5391.25	6152.23	8032.77	7559.45	9345.39	8746.08	5510.52	5129.31	5866.38	8066.07
GO_MITOCHONDRION_ORGANIZATION	6610.79	6355.97	6368.18	6511.85	6260.17	6709.73	6376.28	7539.33	7041.81	7395.46	7029.42	6727.41	6474.31	7015.49	6340.2
GO_LYMPHOCYTE_ACTIVATION	6607.72	6793.66	6570.31	6874.54	6627.49	6587.94	6413.04	7060.52	6953.41	4188.37	5010.79	7536.19	7348.48	6493.47	5579.62
GO_REGULATION_OF_MAP_KINASE_ACTIVITY	6606.4	6623.68	6624.59	6781.22	6594.05	6421.08	6523.27	6993.83	6850.76	6550.42	6669.08	6381.77	6345.57	6515.51	6618.75
GO_CELLULAR_RESPONSE_TO_PROSTAGLANDIN_E_STIMULUS	6606.25	6198.76	6137.57	7128.53	7024.76	5817.29	6064.24	6597.62	6516.96	6788.43	7174.52	6614.88	7029.26	7407.82	5864.81
GO_POSITIVE_REGULATION_OF_PROTEIN_DEPOLYMERIZATION	6605.24	6353.45	6712.28	6566.69	6400.85	5703.19	5871.35	7649.44	7411.45	8456.34	7432.36	6053.02	5467.16	6781.44	6643.79
GO_ENERGY_DERIVATION_BY_OXIDATION_OF_ORGANIC_COMPOUNDS	6603.13	6448.93	6499.63	6584.44	6301.64	6661.53	6426	7165.2	6387.25	7241.13	7364.25	6621.83	6377.97	7303.3	6799.36
GO_NEGATIVE_REGULATION_OF_HUMORAL_IMMUNE_RESPONSE	6603.06	6720.28	5528.64	5990.91	5601.26	8716.03	9233.79	6449.89	7259.76	6485.84	7066.08	4673.44	4147.06	7283.42	7490.11
GO_REGULATION_OF_CELLULAR_RESPONSE_TO_STRESS	6602	6579.05	6454.47	6645.59	6445.19	6270.31	6261.91	7129.1	6846.09	6728.82	6655.07	6624.95	6411.21	6763.64	6450.1
GO_TRANSITION_METAL_ION_TRANSPORT	6599.66	6887.85	6769.23	6938.64	6958.18	7031.09	6880.7	6547.31	6652	6232.58	6466.81	6209.77	5944.1	6521.06	5866.01
GO_RESPONSE_TO_INTERLEUKIN_6	6598.84	7524.75	7613.77	7225.22	7491.45	7282.84	6850.68	6169.67	6644.96	5452.78	6349.59	6552.72	6087.87	6353.84	6395
GO_MITOCHONDRIAL_RESPIRATORY_CHAIN_COMPLEX_ASSEMBLY	6597.82	6043.11	5569.42	6182.04	6051.63	6785.9	6408.4	7676.41	6749.63	7641.28	7145.67	6682.11	6246.64	7222.33	6513.54
GO_POSITIVE_REGULATION_OF_FATTY_ACID_METABOLIC_PROCESS	6595.4	6593.96	6596.84	6956.71	6858.68	5933.96	6075.15	5783.37	6693.38	6666.68	7133.29	5938.75	5953.24	6988.51	6545.93
GO_RNA_PROCESSING	6595.12	6607.94	6562.96	6453.59	6258.89	6558.62	6057.82	7177.72	6888.22	6907.9	6676.11	6660.1	6582.29	7001.32	6184.88
GO_REGULATION_OF_BINDING	6592.37	6548.39	6493.88	6803.52	6509.42	6544.91	6363.72	6991.99	7000.9	6401.66	6532.1	6654.48	6648.96	6663.04	6636.35
GO_MIDBRAIN_DEVELOPMENT	6590.99	6477.81	6629.72	6532.76	6552.26	6491.88	6516.47	7216.5	6785.71	7373.61	7537.83	6034.23	6026.2	7290.72	7760.12
GO_NEGATIVE_REGULATION_OF_ADAPTIVE_IMMUNE_RESPONSE	6590.46	6021.75	5683.35	6844.85	6646.18	7148.9	6970.39	6602.01	6578.9	5528.17	6239.65	6994.15	6846.28	6024.49	5926.33
GO_RRNA_CONTAINING_RIBONUCLEOPROTEIN_COMPLEX_EXPORT_FROM_NUCLEUS	6586.49	6485.54	6860.3	6637.89	6024	5881.44	4537.43	7893.71	7012.31	7184.42	6335.79	6535.09	6711.41	8668.84	6142.13
GO_POSITIVE_REGULATION_OF_PROTEIN_EXIT_FROM_ENDOPLASMIC_RETICULUM	6586.2	6224.32	6187.11	6638.84	6468.13	6948.21	6835.3	6447.74	6533.55	8117.78	8137.82	6290.84	5813.39	7174.38	7793.88
GO_AMYLOID_PRECURSOR_PROTEIN_METABOLIC_PROCESS	6585.66	6651.35	6626.42	6928.74	6514.48	7698.71	7328.62	6994.76	7338.48	6042.8	6544.91	6117.74	6372.45	6313.67	6516.13
GO_NEGATIVE_REGULATION_OF_CYTOKINE_SECRETION	6584.34	6728.14	6570.86	7270.85	6958.63	6347.32	6684.49	6412.01	6764.7	4975.81	5802.62	6597.82	6778.33	5959.45	5881.63
GO_REGULATION_OF_NUCLEOTIDE_METABOLIC_PROCESS	6584.17	6591.53	6576.82	6721.68	6396.97	6908.33	6687.03	6711.56	6519.76	6123.14	5898.54	6495.06	6356.36	7315.31	6626.36
GO_POSITIVE_REGULATION_OF_FATTY_ACID_TRANSPORT	6579.19	7960.1	7689.67	7229.02	7260.57	6310.77	5464.41	4805.05	5347.51	5773.93	7560.49	6441.36	6717.01	7160.4	4440.58
GO_ORGANELLE_TRANSPORT_ALONG_MICROTUBULE	6578.82	6628.39	6565	6200.64	6177.78	7144.09	7019.36	6886.22	6621.92	6462.13	6419.19	6506.57	6592.63	6817.65	6338.05
GO_FC_RECEPTOR_SIGNALING_PATHWAY	6578.48	6847.87	6632.62	6524.33	6426.11	6513.07	6143.21	7238.78	6948.04	4604.76	5250.03	8273.38	8105.43	7001.08	6369.81
GO_UDP_N_ACETYLGLUCOSAMINE_BIOSYNTHETIC_PROCESS	6577.93	7282.37	7310.4	6972.27	6313.95	4840.39	4260.21	6533.42	6277.65	6602.82	6163.1	6553.05	6678.75	7554.48	6798.73
GO_L_ALPHA_AMINO_ACID_TRANSMEMBRANE_TRANSPORT	6577.92	7793.13	7753.24	7323.83	7137.44	6328.65	6392.47	6490.55	6841.4	6238.29	6321.2	6665.28	6367.03	7686.07	5260.02
GO_EPITHELIAL_CELL_APOPTOTIC_PROCESS	6577.91	6385.29	6568.18	6888	6394.35	6463.83	6587.64	7252.48	7499.71	6176.56	6427.64	6892.45	7133.02	6930.79	6430.65
GO_NEGATIVE_REGULATION_OF_NEUROINFLAMMATORY_RESPONSE	6577.78	6938.72	6830.91	6247.65	7034.9	7120.66	6511.74	7738.74	7596	5038.93	5838.04	6643.81	6367.9	4763.2	4380.1
GO_DETECTION_OF_OTHER_ORGANISM	6577.61	7215.78	6944.5	7444.31	7220.79	8285.67	8517.13	5283.9	6080.83	5488.55	4611.19	6460.27	5836.64	6197.41	6694.95
GO_RESPONSE_TO_LEUKEMIA_INHIBITORY_FACTOR	6571.62	6669.88	6849.21	6677.2	6720.78	5870.21	5606.43	6746.44	6419.81	6473.36	6226.99	6741.61	6415.03	6780.95	6084.59
GO_MONOSACCHARIDE_CATABOLIC_PROCESS	6571.57	5702.1	5930.31	6764.65	6550.1	6959.31	6840.29	6881.19	6866.77	6116.06	6596.86	6027.35	6399.93	6322.68	6593.05
GO_AGING	6571.53	6824.9	6743.14	6775.61	6626.51	6408.79	6397	6825.06	6831.69	6099.38	6267.75	6386.46	6176.03	6827.69	6516.54
GO_REGULATION_OF_FATTY_ACID_BIOSYNTHETIC_PROCESS	6569.45	7184.43	7591.34	6742.02	6751.22	6546.89	6420.78	6055.65	6592.02	6516.61	6878.57	5931.61	6423.72	7151.94	5883.72
GO_POSITIVE_REGULATION_OF_PROTEIN_LOCALIZATION_TO_CELL_PERIPHERY	6568.88	6576.09	6415.41	6443.07	5880.32	6044.48	6154.21	7607.38	7178.4	6608.4	7138.74	6430.18	6561.66	7136.36	6746.85
GO_REGULATION_OF_TRANSCRIPTION_BY_RNA_POLYMERASE_I	6564.68	6377.65	6059.23	6660.34	6156.22	5940.91	5164.6	7187.21	6929.58	6937.79	7586.27	6699.63	6469.02	7647.19	6311.61
GO_REGULATION_OF_MITOCHONDRIAL_OUTER_MEMBRANE_PERMEABILIZATION_INVOLVED_IN_APOPTOTIC_SIGNALING_PATHWAY	6562.58	6362.26	6550.3	6114.66	6133.59	6352.28	5828.87	7926.95	7552.46	7533.46	7619.89	6823.77	6530.14	7308.1	6574.87
GO_PHAGOCYTOSIS	6560.9	6650.85	6388.37	6574.89	6348.28	6546.91	6409.12	6640.27	6925.12	4013.86	5130.95	7886.84	7852.57	6619.45	6001.43
GO_DEFENSE_RESPONSE_TO_FUNGUS	6558.83	6962.85	6554.72	6489.28	7447.94	6959.03	7641.14	7691.18	6269.21	5289.98	6562.95	5418.18	4316.89	5851.37	6631.45
GO_CELLULAR_MONOVALENT_INORGANIC_CATION_HOMEOSTASIS	6557.57	6840.4	7042.53	6697.97	6482.03	6534.49	6627.2	6125.77	6710.84	5741.01	6050.33	6580.64	6286.47	6840.87	5394.7
GO_INTESTINAL_EPITHELIAL_CELL_DEVELOPMENT	6556.44	6981.64	7117.66	6574.23	6538.66	5335.64	4836.41	8035.73	7993.02	4077.3	4684.71	7959.36	7730.84	6289.53	5666.31
GO_REGULATION_OF_CELLULAR_PROTEIN_LOCALIZATION	6556.06	6430	6355.38	6555.43	6265.61	6556.69	6437.17	7298.23	6988.18	6925.43	6802.63	6423.23	6448.53	6841.17	6698.66
GO_REGULATION_OF_URINE_VOLUME	6555.72	5777.42	6187.5	6667	6479.73	6229.41	6631.72	6687.23	7257.92	6814.94	7081.24	4488.39	4656.48	5568.48	6703.44
GO_REGULATION_OF_ENDOCYTOSIS	6553.73	6337.55	6345.03	6746.16	6407.15	6562.79	6544.68	6848.47	7196.54	6186.14	6510.97	6490.97	6584.5	6887.5	6608.39
GO_MITOCHONDRIAL_MEMBRANE_ORGANIZATION	6553.45	6061.52	6252.11	6214.12	6062.16	6335.09	5979.4	7272.57	7200.44	7156.61	6971.21	6784.9	6559.12	7329.21	6547.79
GO_ALDITOL_METABOLIC_PROCESS	6544.46	7441.82	7593.13	7045.19	7055	8160.71	7985.59	5865.99	6798.86	6068.99	6045.51	6290.06	6111.49	5841.74	5679.66
GO_POSITIVE_REGULATION_OF_ANION_TRANSPORT	6543.99	7128.38	7256.97	6950.4	6660.82	6251.43	6269.61	6050.57	6489.15	6598.82	6643.59	5925.69	6218.9	6758.09	5818.32
GO_POSITIVE_REGULATION_OF_INTRACELLULAR_SIGNAL_TRANSDUCTION	6543.2	6561.32	6489.63	6762.61	6592.64	6377.67	6418.07	7054.81	6904.65	6386.4	6879.74	6525.09	6403.71	6754.66	6495.3
GO_NEGATIVE_REGULATION_OF_MYOTUBE_DIFFERENTIATION	6542.75	6737.52	6560.01	6681.05	6480.28	6439.08	6404.79	8865.93	6602.84	6352.31	6948.87	6570.4	5930.51	6525.5	6407.49
GO_PHOSPHATIDYLINOSITOL_PHOSPHORYLATION	6542.45	6260.36	6663.53	6238.79	6003.84	6583.98	6500.92	7198.3	6668.88	5856.27	6160.38	6882.8	6742.61	6954.92	4461.71
GO_REGULATION_OF_CYTOKINE_SECRETION_INVOLVED_IN_IMMUNE_RESPONSE	6541.94	7121.39	6818.57	7843.17	7288.33	6105.33	6781.22	5502.07	6528.95	5468.78	6554.94	5751.26	6719.77	5936.47	6396.34
GO_POSITIVE_REGULATION_OF_PROTEIN_LOCALIZATION_TO_MEMBRANE	6540.36	6211.98	6317.95	6282.64	5791.1	6224.21	6246.63	7530.37	7329.76	6841.9	7047.13	6474.57	6606.16	6803.56	6624.78
GO_REGULATION_OF_CELL_ADHESION	6539.79	6567.63	6545.64	6825.55	6533.93	6282.56	6319.17	7236.77	7284.46	5819.89	6172.93	6618.1	6464.27	6606.5	6031.87
GO_RIBONUCLEOPROTEIN_COMPLEX_BIOGENESIS	6539.29	6636.1	6524.33	6290.77	5982.68	6303.57	5533.03	7165.61	6554.25	7070.84	6805.35	6376.73	6215.62	7217.1	6601.75
GO_NEGATIVE_REGULATION_OF_RESPONSE_TO_DNA_DAMAGE_STIMULUS	6538.99	6530.8	6510.82	6547.18	6420.06	6452.03	6341.95	6785.46	6717.29	6828.16	7165.2	6863.78	6700.01	6496.6	5772
GO_NEGATIVE_REGULATION_OF_NEURAL_PRECURSOR_CELL_PROLIFERATION	6538.34	6284.24	6261.08	7104.23	6703.7	5062.25	5698.68	6735.41	7446.52	5647.06	7011.39	5750.78	6372.98	6916.07	7163.17
GO_POSITIVE_REGULATION_OF_PHOSPHATIDYLINOSITOL_3_KINASE_SIGNALING	6537.17	6934.31	6470.16	6936.15	6754.84	6561.58	6603.18	6469.15	7000.96	5883.52	6024.11	6512.76	6484.53	6669.24	6282.4
GO_REGULATION_OF_DNA_TEMPLATED_TRANSCRIPTION_INITIATION	6535.66	6651.03	6852.36	6785.99	6487.85	6309.8	6017.23	7069.48	7022.76	6519.52	6517.44	6747.16	6551.79	6501.26	6162.75
GO_POSITIVE_REGULATION_OF_T_CELL_PROLIFERATION	6530.76	6504.71	6257.04	7196.65	6873.65	6512.95	6334.28	6877.67	6948.56	4120.42	6023.94	7409.43	7464.87	6548.57	5092.14
GO_SPHINGOSINE_METABOLIC_PROCESS	6529.05	6876.04	7186.77	6550.48	6156.44	6628.13	6513.89	6544.22	5451.27	7316.89	7200.05	6422.5	5607.75	5650.67	4058.42
GO_RESPONSE_TO_NITROGEN_COMPOUND	6528.26	6428.19	6495.08	6709.15	6446.19	6411.64	6381.63	6640.47	6636.19	6270.08	6543.92	6606.55	6512.6	6788.2	6592.59
GO_HISTONE_H3_K36_METHYLATION	6524.91	6396.6	6166.54	6059.67	6329.44	6966.9	6739.45	6573.61	6476.2	6657.4	6265.61	6720.65	6847.94	7242.79	3766.26
GO_CELLULAR_RESPONSE_TO_OSMOTIC_STRESS	6524.83	6449.86	6319.63	6720.95	6204.12	6377.43	6552.47	7187.21	6929.55	8156.55	7733.14	5879.61	5549.09	6497.19	7461.08
GO_SPERMATID_NUCLEUS_DIFFERENTIATION	6522.44	6256.53	6232.5	7217.39	7368.94	7451.72	7446.92	6154.77	6481.8	7968.68	7412.02	6563.08	6169.92	5840.4	5522.57
GO_NUCLEAR_BODY_ORGANIZATION	6521.78	7668.15	7448.33	7172.04	6802.55	6267.16	5801.93	6537.26	7131.15	5975.58	5850.88	6506.3	6473.91	7374.46	5575.24
GO_ADIPOSE_TISSUE_DEVELOPMENT	6521.74	6312.26	6499.6	6608.01	6441.31	6543.88	6426.57	6284.09	6917.69	7146.17	6882.05	6383.09	6579.7	6821.66	6237.89
GO_REGULATION_OF_CELLULAR_COMPONENT_SIZE	6521.38	6431.68	6371.8	6535.3	6360.58	6416.15	6516.45	6829.58	6740.99	6735.36	6741.78	6283.37	6220.32	6526.3	6844.86
GO_PHAGOLYSOSOME_ASSEMBLY	6521.02	6915.08	6590.11	6459.69	6529.5	7567.54	7833.58	6230.48	6775.91	4110.6	5789.51	6512.53	6347.45	7480.39	6054.82
GO_RESPONSE_TO_ORGANOPHOSPHORUS	6519.06	6098	6373.91	6792.75	6248.83	5948.16	6136.13	6534.6	6793.69	6629.11	7158.44	6503.52	6437.02	6775.41	6781.16
GO_POSITIVE_REGULATION_OF_TELOMERE_MAINTENANCE_VIA_TELOMERE_LENGTHENING	6518.29	6514.74	6521.84	6464.44	6411.34	7020.22	6619.39	7269.74	5894.22	6611.09	5942.05	6754.21	6178.22	6810.94	6027
GO_ERK1_AND_ERK2_CASCADE	6517.27	6380.32	6409.24	6685.9	6457.43	6138.36	6252.37	6898.99	7143.05	6170.92	7087.78	6577.11	6450.38	6972.31	6936.85
GO_RESPONSE_TO_ANTINEOPLASTIC_AGENT	6516.77	6524.31	6264.25	6509.24	6437.91	6487.23	6894.69	7513.01	7394.68	6484.07	6032.38	6774.74	6312.76	7123.05	7228.62
GO_POSITIVE_REGULATION_OF_NEURON_PROJECTION_REGENERATION	6515.93	6528.2	5610.53	5891.35	6519.55	6727.35	7713	7527.58	7365.18	6005.88	6512.32	6533.42	6503.11	5695.51	5218.23
GO_MICROTUBULE_ORGANIZING_CENTER_LOCALIZATION	6515.65	5624.52	5784	5659.23	5488.77	7088.73	7148.89	7415.21	6492.38	7798.63	7115.93	5186.95	4413.1	6773.83	6538.93
GO_CELLULAR_RESPONSE_TO_EXTRACELLULAR_STIMULUS	6515.6	6522.31	6624.88	6671.66	6508	6437.96	6313.14	6688.51	6760.1	6846.61	6508.9	6357.52	6307.46	6869.99	6333.49
GO_REGULATION_OF_RESPIRATORY_GASEOUS_EXCHANGE	6514.68	6702.69	7309.97	6919.85	6573.53	6394.39	6455.83	6319.37	6697.41	4172.44	4962.3	6658.2	6598.2	6337.09	4247.26
GO_POSITIVE_REGULATION_OF_LOCOMOTION	6514.41	6594.73	6494.38	6746.61	6534.44	6190.79	6251.99	7073.45	7039.19	5920.03	6445.99	6462.82	6334.74	6681.95	6605.57
GO_REGULATION_OF_EPITHELIAL_CELL_APOPTOTIC_PROCESS	6514.11	6336.99	6539.11	6894.89	6489.11	6305.56	6424.51	7083.99	7378.64	5884.95	6318.74	6899.44	7213.29	7217.22	6335.48
GO_SINGLE_STRANDED_VIRAL_RNA_REPLICATION_VIA_DOUBLE_STRANDED_DNA_INTERMEDIATE	6513.48	6272.88	6467.48	6559.48	5793.5	7368.14	7121.39	8075.91	7711.5	5878.94	5916.14	8337.92	7999.93	5395.6	5212.62
GO_POSITIVE_REGULATION_OF_PROTEIN_METABOLIC_PROCESS	6512.71	6406.81	6396.13	6610.74	6405.37	6353.69	6311.18	6968.09	6860.05	6352.75	6612.39	6648.83	6474.04	6769.43	6551.39
GO_PROTEIN_LOCALIZATION_TO_NUCLEUS	6512.15	6571.92	6508.92	6674.62	6376.29	6515.38	6344.17	7061.98	6839.47	6937.51	6426.94	6319.11	6173.75	6842.38	6477.39
GO_REGULATION_OF_MACROPHAGE_MIGRATION	6511.9	6307.32	6377.42	6780.96	5944.47	6219.8	6646.38	7914.56	7738.99	5795.89	6351.7	6985.45	6828.63	7400.64	5657.5
GO_VESICLE_CYTOSKELETAL_TRAFFICKING	6511.89	6449	6369.25	5810.55	5960.44	7184.82	6853.83	7020.19	6574.79	6323.65	6041.52	6594.92	6714.22	6603.06	6104.66
GO_POSITIVE_REGULATION_OF_GLIAL_CELL_MIGRATION	6511.56	6419.87	6006.56	6858.32	6497.14	5773.53	6941.37	6525.98	6314.08	4590.11	6852.2	7389.61	7408.01	6681.45	4544.38
GO_MEMBRANE_ORGANIZATION	6509.23	6485.19	6410.11	6455.15	6293.97	6576.52	6533.26	7174.58	6981.51	6158.11	6417.87	6945.69	6818.58	6927.01	6374.55
GO_NEGATIVE_REGULATION_OF_PROTEIN_DEPHOSPHORYLATION	6509.19	6499.28	6596.67	6537.08	6550.22	5769.77	5924.94	7074.86	6601.44	6760.1	6479.15	6167.98	6064.52	6492.86	6519.1
GO_NUCLEOTIDE_SUGAR_BIOSYNTHETIC_PROCESS	6508.87	6914.06	6832.12	6270.21	5944.48	5113.39	4210.78	6423.54	6063.39	7047.08	6253.92	6594.2	6660.91	7196.55	7164.74
GO_POSITIVE_REGULATION_OF_NUCLEOTIDE_BIOSYNTHETIC_PROCESS	6508.82	6733.98	6405.14	6999.73	6741.37	7276.75	7350.38	6558.62	6058.49	5515.21	5953.35	5384.09	4719.69	7530.06	6459.01
GO_NEGATIVE_REGULATION_OF_TOLL_LIKE_RECEPTOR_SIGNALING_PATHWAY	6508.09	7130.92	6773.45	7134.79	7328.5	6754.95	6492.95	6523.23	6588.33	5749.43	5730.32	5864.26	6394.79	5346.48	5507.36
GO_SUBSTRATE_ADHESION_DEPENDENT_CELL_SPREADING	6507.7	6516.95	6536.23	6498.45	6174.18	6077.39	6237.9	6719.75	7025.16	6339.92	6814.37	6019	6170.84	7020.09	6650.54
GO_RESPONSE_TO_ATP	6506.59	5687.47	6359.57	6988.85	6347.57	6256.84	6486.44	6616.55	6688.05	5965.28	6917.71	7478.36	7099.45	6526.74	6317.44
GO_NEGATIVE_REGULATION_OF_ENDOCYTOSIS	6506.24	6175.6	6529.52	6801.77	6375.29	6997.56	6803.55	6776.24	7451.21	6384.8	5563.79	5784.32	6129.83	6482.97	6728.48
GO_RESPONSE_TO_PURINE_CONTAINING_COMPOUND	6499.27	6228.21	6424.77	6903.25	6507.13	6020.87	6197.69	6404.79	6850.81	6675.84	7162.47	6491.4	6474.6	6838.61	6721.13
GO_ESTABLISHMENT_OF_ORGANELLE_LOCALIZATION	6498.98	6478.51	6355.36	6360.78	6222.56	6825.73	6736.85	7265.86	6883.44	6647.24	6448.59	6506.38	6336.17	6813.63	6491.57
GO_POSITIVE_REGULATION_OF_RNA_POLYMERASE_II_TRANSCRIPTIONAL_PREINITIATION_COMPLEX_ASSEMBLY	6498.89	6530.83	7286.88	6630.05	6416.43	5879.86	4232.28	7292.71	6830.24	3828.7	5815.27	6538.55	6466.95	6072.12	6637.08
GO_NEGATIVE_REGULATION_OF_CELLULAR_PROTEIN_CATABOLIC_PROCESS	6498.51	6268.4	6113.7	6681.95	6413.22	6313.55	6062.26	7542.83	6600.59	6852.87	7214.79	6479.61	6517.41	6910.08	6474.44
GO_NEGATIVE_REGULATION_OF_PHOSPHORYLATION	6498.08	6374.03	6506.8	6570.87	6236.99	6292.64	6330.61	7007.48	6911.38	6562.5	6489.37	6111.09	6103.4	6631.2	7065.22
GO_REGULATION_OF_CHOLESTEROL_ESTERIFICATION	6497.22	5942.11	7138.36	6628.75	6128.32	6365.69	7040.45	5664.82	7901.71	3153.39	6631.44	3225.17	5816.79	6731.4	7360.91
GO_REGULATION_OF_LEUKOCYTE_ADHESION_TO_VASCULAR_ENDOTHELIAL_CELL	6494.47	6556.15	6722.89	7073.67	6680.98	6004.01	6432.8	5591.11	6686.98	4470.9	5518	6934.97	6763.24	6152.86	6059.6
GO_NEGATIVE_REGULATION_OF_INTERLEUKIN_8_PRODUCTION	6492.76	7193.23	7734.16	7386.39	6906.03	6436.84	6586.19	5664.98	7025.38	5121.26	5026.63	6414.81	6057.62	6548.67	6016.94
GO_POSITIVE_REGULATION_OF_PEPTIDE_SECRETION	6492.69	6539.95	6607.95	6798.36	6624.75	6498.45	6458.1	6486.93	6782.52	5829.28	6044.01	6257.02	6172.85	6519.58	6132.34
GO_STRIATED_MUSCLE_CELL_APOPTOTIC_PROCESS	6492.64	6506.16	6912.26	6552.59	6183.62	6669.77	7147.8	6479.12	7408.29	6211.07	6230.48	6196	6574.33	6116.05	6226.28
GO_NEGATIVE_REGULATION_OF_ERK1_AND_ERK2_CASCADE	6489.33	6353.09	6629.78	6425.42	5951.27	6250.54	6553.25	6658.77	6988.3	6373.97	7108.14	6086.76	6095.47	6590.63	7819.94
GO_SIGNAL_TRANSDUCTION_IN_ABSENCE_OF_LIGAND	6488.97	6323	6519.29	6229.32	5950.65	5485.9	5516.64	7766.1	7221.43	7369.44	7218.93	6497.69	6300.95	6480.25	7023.75
GO_NEGATIVE_REGULATION_OF_BINDING	6486.54	6505.34	6447.17	6927.28	6656.13	6467.74	6399.47	6869.4	6844.99	6223.22	6276.03	6441.41	6378.33	6531.74	6768.53
GO_CELLULAR_COMPONENT_DISASSEMBLY	6485.55	6492.42	6478.68	6474.24	6255.56	6729.62	6531.72	7087.19	6871.8	6448.57	6711.67	6362.28	6260.4	7099.47	6415.39
GO_NEGATIVE_REGULATION_OF_SIGNAL_TRANSDUCTION_IN_ABSENCE_OF_LIGAND	6483.6	6518.61	6492.93	6454.88	6148.25	4957.45	4951.16	7849.03	7207.64	7641.62	7706.65	6474.28	6301.58	6129.64	6708.81
GO_RESPONSE_TO_EXTRACELLULAR_STIMULUS	6481.46	6376.15	6491.44	6606.44	6387.22	6471.47	6403.45	6776.06	6832.04	6718.6	6758.91	6314.2	6322.57	6741.83	6383.52
GO_POSITIVE_REGULATION_OF_CATALYTIC_ACTIVITY	6480.92	6378.67	6370.96	6590.48	6338.93	6511.09	6462.77	6962.85	6875.3	6499.07	6539.07	6453.99	6328.43	6658.21	6419.82
GO_ACTIN_FILAMENT_DEPOLYMERIZATION	6480.76	6674.46	6231.63	6313.09	6239.14	6251.97	6315.37	6816.6	6620.92	6428.38	7021.24	6533.14	6331.37	6786.38	7625.79
GO_NEGATIVE_REGULATION_OF_CELL_ACTIVATION	6480.27	6434.98	6375.98	6655.85	6460.34	6470.53	6490	7405.73	7489.94	5275.58	6297.08	7229.11	6988.2	6684.44	5818.4
GO_PLATELET_ACTIVATION	6480.17	6643.43	6420.92	6804.25	6625.83	6513.03	6483.74	6476.59	6776.75	5574.06	5591.71	6250.53	6473.94	6556.02	6290.22
GO_REGULATION_OF_BROWN_FAT_CELL_DIFFERENTIATION	6480.13	6596.7	6803.24	7272.21	6277.7	6619.55	6363.56	6350.62	7257.71	6662.03	5883.81	5268.77	6046.44	6696.38	6078.99
GO_POSITIVE_REGULATION_OF_ISOTYPE_SWITCHING	6480.1	6262.96	6221.41	6836.65	6276.4	6616.41	6343.8	7196.13	7235.48	4315.8	5859.21	7512.38	7800.12	7416.44	5062.37
GO_SIGNAL_TRANSDUCTION_IN_RESPONSE_TO_DNA_DAMAGE	6479.76	6544.75	6400.43	6580.72	6551.98	6610.12	6414.77	7189.51	6751.74	5999.29	6025.92	6612.5	6192.36	6305.92	5896.28
GO_REGULATION_OF_ACTIN_FILAMENT_ORGANIZATION	6479.19	6461.06	6284.6	6497.31	6208.82	6259.92	6296.06	6876.19	6864.78	6874.68	6923.67	6263.87	6316.09	6687.68	6901.94
GO_NEGATIVE_REGULATION_OF_G_PROTEIN_COUPLED_RECEPTOR_SIGNALING_PATHWAY	6478.99	6126.9	5929.44	6822.78	6622.01	6719.6	6631.94	6224.72	6335.98	6937.44	6880.61	5318.43	5598.22	6238.99	7075.94
GO_EPITHELIAL_CELL_MATURATION	6478.43	6490.92	6663.83	6281.9	6364.96	6129.7	5612.62	8585.67	8830.65	5598.49	6465.93	7491.1	6910.17	6422.34	6629.07
GO_NEGATIVE_REGULATION_OF_DEFENSE_RESPONSE	6476.96	6503.99	6538.8	6528.63	6451.68	6763.07	6813.51	6392.34	6790.34	4848.04	5680.57	6502.24	6412.5	5909.03	5826.51
GO_CELLULAR_RESPONSE_TO_CADMIUM_ION	6476.76	4900.87	4764.87	6152.52	5810.03	6655.73	6564.85	7748.38	6388.67	6652.28	6845.38	6022.71	6004.75	7124.2	6950.89
GO_PROSTANOID_METABOLIC_PROCESS	6476.59	6432.2	6520.98	7081.61	6432.09	5954.84	6229.69	6645.6	6785.31	6620.64	7740.11	5604.36	5433.2	7857.1	5369.51
GO_NEGATIVE_REGULATION_OF_RHO_PROTEIN_SIGNAL_TRANSDUCTION	6472.76	6440.6	6818.15	6995.9	5989.59	5998.86	5808.66	6504.91	6615.23	7147.03	7620.41	5963.65	6072.87	6602.39	6113.76
GO_REGULATION_OF_MEMBRANE_PERMEABILITY	6472.18	6182.8	6385.53	6181.14	5959.21	6131.84	5973.34	7387.03	6926.48	7310.05	7214.76	6531.86	6412.5	7094.15	6531.96
GO_REGULATION_OF_CELL_ACTIVATION	6472.16	6600.49	6422.76	6714.52	6408.65	6301.64	6148.73	7092.11	7080.17	4207.32	5183.52	7270.28	7143.74	6521.57	5309.13
GO_PROTEIN_MODIFICATION_BY_SMALL_PROTEIN_CONJUGATION_OR_REMOVAL	6469.85	6177.57	6176.34	6140.15	6006.39	6443.98	6286.39	7069	6656.98	6804.43	6495.72	6673.53	6496.08	6598.45	6305.97
GO_REGULATION_OF_PROTEIN_CONTAINING_COMPLEX_DISASSEMBLY	6467.6	6507.54	6349.11	6300.31	6152.11	6309.28	6427.66	6988.74	6808.4	7044.83	7237.61	6289.22	6281.47	6636.05	6543.08
GO_POSITIVE_REGULATION_OF_INTERLEUKIN_5_PRODUCTION	6466.59	6535.96	6646.65	6983.58	7302.16	7152.37	7122.79	6397.23	6340.6	5039.05	5127.6	6007.33	5597.19	7163.14	4566.44
GO_NUCLEOSIDE_DIPHOSPHATE_METABOLIC_PROCESS	6465.69	6141.18	5977.15	6452.54	6218.43	6478.83	6419.25	7090.87	6559.49	7130.47	7050.56	6425.79	6484.35	6537.92	6255.71
GO_POSITIVE_REGULATION_OF_COLD_INDUCED_THERMOGENESIS	6464.43	5949.65	5928.08	6548.62	6196.07	6440.07	6407.33	6488.78	6869.31	6497.18	6961.06	6388.77	6549.36	6867.05	6318.48
GO_POSITIVE_REGULATION_OF_WOUND_HEALING	6464	6504.43	6255.21	6715.22	6377.78	6041.78	6463.5	7372.7	7579.49	7247.18	6660.99	5941.98	5732	6464.51	6304.8
GO_LAMELLIPODIUM_ORGANIZATION	6460.4	5849.28	5869.32	6293.36	6150.65	6091.5	6408.14	7299.61	7402.25	5999.47	6512.67	6681.89	6607.73	7276.47	6836.4
GO_T_CELL_DIFFERENTIATION_IN_THYMUS	6459.97	6658.52	6496.71	6842.09	6423.24	6580.95	6189.56	6880.6	6700.61	4075.73	4760.05	6355.08	5883.51	6591.3	5366.62
GO_REGULATION_OF_STEM_CELL_DIFFERENTIATION	6457.56	5979.6	5867.63	5901.12	5767.02	6159.64	6002.49	7636.49	6963.98	7094.75	7239.48	6545.88	6369.24	6809.9	6688.31
GO_GOLGI_ORGANIZATION	6456.29	6211.58	6260.46	6151.46	6043.06	6773.88	6621.78	6735.98	6554.82	6334.45	6479.49	6467.85	6444.74	6702.04	6226.76
GO_PROTEIN_TARGETING_TO_MITOCHONDRION	6455.95	5996.15	6132.85	6412.98	6154.74	6582.82	5945.6	6738.59	6424.45	6656.16	6569.4	6478.37	6433.53	6855.52	6904.04
GO_NEGATIVE_REGULATION_OF_LYMPHOCYTE_APOPTOTIC_PROCESS	6455.28	6515.86	6394.7	6933.71	6584.52	6333.89	6170.71	7437.99	6783.65	5408.75	5501.53	6812.78	6736.23	5474.7	4515.53
GO_POSITIVE_REGULATION_OF_RESPONSE_TO_WOUNDING	6452.36	6451.34	6122.48	6474.55	6243.19	6046.82	6583.51	7270.88	7437.28	7029.53	6759.37	5996.53	5870.93	6453.38	6292.05
GO_REGULATION_OF_ESTABLISHMENT_OF_PROTEIN_LOCALIZATION	6451.72	6427.54	6518.22	6660.03	6464.19	6499.11	6439.25	6801.99	6753.87	6328.8	6417.63	6373.8	6301.53	6616.78	6321.5
GO_NUCLEUS_LOCALIZATION	6451.71	5854.73	6106.18	6584.94	6138.16	6123.92	6254.15	6811.1	7488.72	7571.18	7124.69	6093.22	6450.91	6452.52	6717.29
GO_PROTEIN_MODIFICATION_BY_SMALL_PROTEIN_CONJUGATION	6451.43	6181.85	6202.41	6165.96	6038.81	6430.19	6267.24	7107.45	6692.1	6824.9	6472.66	6654.75	6488.29	6608.7	6377.66
GO_POSITIVE_REGULATION_OF_DNA_BIOSYNTHETIC_PROCESS	6450.89	6296.02	6465.8	6488.94	6293.57	6625.31	6270.4	7257.12	6435.99	6410.32	6065.16	6758.64	6507.83	6522.14	6165.12
GO_NEGATIVE_REGULATION_OF_OSSIFICATION	6450.77	6335.13	6338.8	6922.87	6562.75	5937.36	6173.04	7728.1	7400.49	6994.82	7128.01	6272.46	6114.2	6154.55	7196.25
GO_NEGATIVE_REGULATION_OF_PHOSPHORUS_METABOLIC_PROCESS	6449.75	6283.59	6428.78	6470.72	6164.96	6232.86	6286.26	6978.44	6895.31	6545.22	6475.79	6036.58	6080.64	6547.71	6870.15
GO_SNRNA_TRANSCRIPTION	6447.81	6049.9	5998.93	6509.68	6202.71	6531.48	6199.53	6682.97	6385.93	7091.83	6806.06	6629.1	6133.17	7004.27	5641.51
GO_PIGMENT_GRANULE_ORGANIZATION	6446.61	6793.82	6645.55	6310.45	6421.87	7035.62	6980.02	6720.58	6440.99	6285.95	6091.02	6607.36	6383.12	6452.23	6050.46
GO_REGULATION_OF_B_CELL_RECEPTOR_SIGNALING_PATHWAY	6444.92	7293.29	6690.35	6528.2	6387.14	6502.7	6242.36	6152.22	6348.17	5006.76	4658.82	7060.82	6967.03	7072.26	5768.18
GO_T_CELL_MEDIATED_CYTOTOXICITY	6444.83	6284.86	5953.1	7689.02	7300.96	6457.49	6517.68	6432.18	6279	3829.75	5536.96	6945.03	6796.88	7314.27	5852.66
GO_POSITIVE_REGULATION_OF_NUCLEOTIDE_METABOLIC_PROCESS	6443.71	6552.94	6344.38	6726.01	6709.43	7194.94	7103.12	6428.38	6308.19	5855.27	6459.04	6131.55	5909.15	7299.23	6250.57
GO_REGULATION_OF_PEPTIDYL_TYROSINE_PHOSPHORYLATION	6443.25	6496.54	6280.11	6634.23	6413.96	6069.51	6104.79	6864.07	6973.76	6024.29	6472.55	6836.33	6837.59	6216.47	5994.15
GO_RESPONSE_TO_NUTRIENT	6441.55	6171.44	6429.25	6422.19	6071.82	6453.85	6500.91	6956.57	6917.16	6520.53	6937.95	6406.36	6379.13	6506.91	6029.04
GO_PROTEIN_INSERTION_INTO_MEMBRANE	6441.17	5735.84	6175.72	5720.2	5543.63	5832.78	5782.63	7689.2	7210.66	6829.94	7282.73	6695.41	6543.88	6472.88	6409.46
GO_NEGATIVE_REGULATION_OF_GLYCOPROTEIN_BIOSYNTHETIC_PROCESS	6439.66	5675.79	5676.14	7396.56	6012.81	7531.22	7021.64	6979.5	6949.16	6030.38	6454.92	6424.39	6011.3	4512.26	6467.78
GO_AMELOGENESIS	6438.44	6153.6	6723.28	6096.2	5815.64	6921.25	7219.41	7062.48	7257.5	7326.92	6045.16	5486.49	5666.86	6010.48	6738.63
GO_SOMATIC_RECOMBINATION_OF_IMMUNOGLOBULIN_GENE_SEGMENTS	6438.42	6379.55	6300.37	7167.54	6658.06	6641.23	6064.24	6609.38	6369.18	4566.98	4872.45	6681.36	6497.29	6972.38	4941.65
GO_ERBB_SIGNALING_PATHWAY	6437.87	6392.52	6393.17	6599.84	6126.22	6198.99	6334.28	7652.38	7054.73	7354.3	7449.84	6391.26	6398.72	6477.02	7376.5
GO_LYMPHOCYTE_COSTIMULATION	6437.87	6449.76	6425.97	7112.66	6648.38	6275.35	5927.38	7213.1	7230.7	2312.58	3794.73	6988.12	6713.99	6165.07	4429.09
GO_BRANCHING_INVOLVED_IN_BLOOD_VESSEL_MORPHOGENESIS	6437.01	6942.69	7094.36	6127.58	6482.4	5979.96	6530.23	6753.88	7181.35	6074.67	5308.65	6542.81	6260.32	6391.62	5052.89
GO_LYMPHOCYTE_MIGRATION	6434.91	6436.75	6314.28	6595.98	6443.05	5733.55	5739.95	6871.55	6792.48	4451.73	5808.44	7422.73	7084.62	6433.06	5237.48
GO_MITOCHONDRIAL_TRANSPORT	6433.69	6000.52	6046.96	6145.24	5989.41	6308.81	5815.95	7082.07	6774.44	7015.12	6733.47	6588.44	6357.4	6963.22	6509.97
GO_LYMPHOCYTE_CHEMOTAXIS	6433.45	6526.57	6372.54	6494.37	6709.1	5130.44	5264.76	6777.82	6795.47	4305.86	5938.34	8127.76	7368.52	6046.77	4194.43
GO_REGULATION_OF_CHROMOSOME_ORGANIZATION	6432.38	6315.54	6254.27	6548.15	6344.53	6675.14	6342.52	6938.88	6718.56	5864.62	5615.73	6632.2	6604.86	6520.22	5945.85
GO_POSITIVE_REGULATION_OF_SMALL_MOLECULE_METABOLIC_PROCESS	6432.27	6666.52	6708.68	7140.63	6906.15	6325.9	6442.78	6078.82	6421.76	5990.85	6608.73	6353.73	6325	7128.06	6259.93
GO_NEGATIVE_REGULATION_OF_ATPASE_ACTIVITY	6429.92	7960.77	7217.53	6466.36	6892.02	5421.21	5119.47	6604.47	6876.47	6393.48	5933.7	4687.16	4487.32	7428.22	5354.15
GO_POSITIVE_REGULATION_OF_PROTEIN_SERINE_THREONINE_KINASE_ACTIVITY	6426.73	6443.52	6419.01	6686.8	6456.72	6339.61	6364.04	6809.36	6566.31	6294.65	6456.1	6398.48	6336.22	6434.45	6205.92
GO_REGULATION_OF_POLYSACCHARIDE_METABOLIC_PROCESS	6424.87	5980.25	6411.71	6669.44	6323.33	6298.24	6438.04	6250.16	6579.16	6334.95	7249.72	6085.47	6465.83	6452.33	6559.39
GO_CELL_GROWTH	6424.07	6321.81	6350.12	6486.45	6138.87	6361.68	6341.98	6804.35	6745.92	6659.26	6577.41	6112.62	6013.04	6758.32	6726.04
GO_POSITIVE_REGULATION_OF_NATURAL_KILLER_CELL_MEDIATED_CYTOTOXICITY	6423.92	6887.71	6227.24	6620.59	5749.94	6656.94	5801.11	7682.4	7119.79	2598.61	3650.96	7155.6	7101.59	4933.51	2476.57
GO_NEGATIVE_REGULATION_OF_LYMPHOCYTE_DIFFERENTIATION	6423.59	6076.91	6094.26	6719.47	6102.52	6421.44	6482.8	7811.03	7681.28	5364.81	6425.74	7932.72	7654.34	6378.78	6110.88
GO_POSITIVE_REGULATION_OF_EXTRACELLULAR_MATRIX_ORGANIZATION	6422.43	6100.18	6643.16	6619.3	6371.07	5973.88	5387.31	6943.66	7965.15	3608.15	5641	6764.59	6473.78	7465.64	4469.69
GO_RESPONSE_TO_PLATELET_DERIVED_GROWTH_FACTOR	6420.13	6240.33	5462.86	6462.09	6158.3	6466.14	6298.95	7605.75	6871.11	6378.18	6698.39	6006.61	5678.88	6744.57	7076.65
GO_REGULATION_OF_PROTEIN_SERINE_THREONINE_KINASE_ACTIVITY	6420	6506.14	6508.34	6654.14	6390.28	6437.93	6388.97	7020.04	6711.3	6281.43	6335.64	6541.62	6402.06	6401.48	6348.27
GO_REGULATION_OF_LYMPHOCYTE_ACTIVATION	6419.99	6585.91	6379.84	6653.63	6341.79	6229.86	6045.4	7093.89	7007.59	3895.03	4906.78	7458.2	7298.35	6460.14	5248.59
GO_POSITIVE_REGULATION_OF_ENDOTHELIAL_CELL_MIGRATION	6419.83	6312.6	6510.05	6730.91	6611.95	5747.67	5687.78	6542.52	6848.7	4821.6	5802.98	6246.92	6564	6910.78	6329.6
GO_REGULATION_OF_SISTER_CHROMATID_COHESION	6419.61	6443.36	6521.21	6430.56	6373.46	6691.79	6408.67	7029.35	6116.18	5928.04	3668.66	6905.21	6695.08	6035.3	4465.71
GO_CELLULAR_RESPONSE_TO_TOXIC_SUBSTANCE	6418.52	6254.5	6038.47	6582.54	6234.29	6176.87	6197.49	6667.56	6718.49	6736.55	7115.78	5926.4	5938.21	6924.38	6732.9
GO_POSITIVE_REGULATION_OF_STEROID_METABOLIC_PROCESS	6417.5	6517.48	6681.74	6951.36	6357.9	5802.85	6516.98	5413.19	6477.11	5953.99	8203.79	5120.14	6089.98	6521.52	6288.09
GO_HYALURONAN_METABOLIC_PROCESS	6412.88	6053.79	6205.18	6938.62	6834.5	6749.7	6775.35	6275.28	6408.98	5707.2	6416.78	6212.15	6292.14	7109.61	6906.27
GO_RESPONSE_TO_IONIZING_RADIATION	6412.58	6344.77	6016.07	6335.04	6153.79	6363.17	6192.29	7249.73	6846.01	6620.76	6461.99	6957.13	6485.68	6514.62	5843.59
GO_REGULATION_OF_INTRACELLULAR_SIGNAL_TRANSDUCTION	6411.07	6370.33	6341.05	6527.48	6306.85	6264.67	6275.89	6981.9	6860.92	6524.86	6684.03	6311.89	6213.33	6641.77	6451.81
GO_NEGATIVE_REGULATION_OF_CHROMATIN_ORGANIZATION	6409.33	6413.66	6145.9	6765.21	6405	5941.83	5959.88	6487.72	6608.81	5456.46	6125.23	6244.93	6469.71	7050.9	6933.82
GO_FAT_CELL_DIFFERENTIATION	6409.05	6205.61	6102.49	6431.5	6183.74	5859.75	5665.87	6645.9	6792.58	6386.6	6817.61	6472.83	6349.94	6465.08	6544.68
GO_REGULATION_OF_MACROPHAGE_DERIVED_FOAM_CELL_DIFFERENTIATION	6408.39	6579.72	6568.03	6579.99	6248.76	5609.74	5602.64	5592.6	7293.19	4120.77	6211.17	6737.65	6797.24	8005.13	4758.78
GO_TRANSCRIPTION_PREINITIATION_COMPLEX_ASSEMBLY	6405.06	6525.99	6816.86	6284.13	6206	6725.17	5999.87	7200.04	7224.57	5321.23	5978.43	7026.64	7301.46	6047.49	6090.57
GO_TRANSITION_METAL_ION_HOMEOSTASIS	6402.81	6239.83	6119.04	6751.7	6352.88	6751.08	6562.45	6872.51	6662.76	6297.18	6539.35	6438.25	6245.63	6367.37	6299.75
GO_GENERATION_OF_PRECURSOR_METABOLITES_AND_ENERGY	6402.11	6170.64	6229.76	6323.62	6059.77	6504.96	6237.57	7021.18	6400.13	7078.11	7074.3	6404.09	6203.42	7055.39	6702.59
GO_REGULATION_OF_HISTONE_H3_K9_TRIMETHYLATION	6398.86	7639.19	7662.84	7172.36	7628.42	6541.15	6621.05	5915.37	6799.48	6247.5	5791.39	5703.7	5597.08	6256.57	6116.61
GO_SMOOTH_MUSCLE_CELL_PROLIFERATION	6398.67	6305.18	6391.3	6742.56	6440.29	6181.23	6332.08	6614.76	7138.43	6202.6	6859.77	6406.03	6305.4	6747.85	6334.97
GO_CEREBELLAR_PURKINJE_CELL_LAYER_DEVELOPMENT	6398.34	6727.95	6112.73	6492.25	6936.56	5520.79	5059.94	7265.63	7732.8	7590.94	6129.12	4801.26	4638.49	6304.42	7786.83
GO_REGULATION_OF_GLIAL_CELL_MIGRATION	6398.17	6267.36	5555.58	6946.68	6346.3	5471.22	6159.38	7073.57	6850.33	4828.25	6450.03	7866.4	7755.44	6672.38	4768.63
GO_ACTIVATION_OF_MAPK_ACTIVITY	6397.8	6378.4	6341.13	6715.39	6528.56	6157.57	6332.48	7011.8	7028.59	6139.68	6693.68	6476.92	6417.2	6321.7	6256.25
GO_PURINE_DEOXYRIBONUCLEOTIDE_METABOLIC_PROCESS	6396.67	6433.86	6206.94	6208.62	6184.9	6359.48	5728.61	7011.3	7017.22	5842.02	6627.52	6729.53	7021.71	6577.76	2365.15
GO_REGULATION_OF_MICROTUBULE_POLYMERIZATION	6395.01	6041.2	5877.13	6552.87	6279.24	6790.77	6510.78	7088.79	7064.76	6935.91	6207.24	6226.08	6260.26	6263.92	7244.26
GO_FATTY_ACID_TRANSMEMBRANE_TRANSPORT	6394.81	5919.35	5384.44	5613.33	5734.81	5198.92	5075.63	6705.56	6823.03	6549.73	6555.91	6726.63	6602.11	7347.65	6239.89
GO_POSITIVE_REGULATION_OF_CELL_CYCLE_G1_S_PHASE_TRANSITION	6392.14	7108.37	6619.57	6422.33	6292.91	6627.18	6209.83	6367.25	6417.02	5023.77	5604.32	6897.99	6266.51	7150.3	5780.74
GO_MODIFICATION_OF_MORPHOLOGY_OR_PHYSIOLOGY_OF_OTHER_ORGANISM	6391.37	6180.29	6052.93	6380.67	6234.52	6304.64	6460.44	7270.11	6719.18	5872.79	6796.55	6402.07	6074.48	6465.79	6478.6
GO_NEGATIVE_REGULATION_OF_CARBOHYDRATE_METABOLIC_PROCESS	6390.53	5441.66	6043.91	6591.33	6343.25	6681.01	6383.96	6692.9	7155.29	6658.49	6155.57	6279.85	6397.1	6370.14	6952.01
GO_POSITIVE_REGULATION_OF_MOLECULAR_FUNCTION	6389.66	6363.75	6337.98	6558.28	6291.5	6460.79	6394.76	6888.38	6825.39	6347.71	6384.56	6405.84	6301.36	6608.28	6364.97
GO_CELLULAR_RESPONSE_TO_NITROGEN_COMPOUND	6389.64	6332.65	6382.53	6699.86	6498.5	6296.77	6368.04	6513.6	6655.15	6284.26	6396.76	6333.49	6360.29	6556.35	6520.19
GO_INTRACELLULAR_STEROID_HORMONE_RECEPTOR_SIGNALING_PATHWAY	6388.83	6190.34	6043.89	6279.26	6137.73	6522.99	6337.3	6706.15	6594.98	6754.68	6440.35	6215.27	6044.25	6793.26	6885.24
GO_POSITIVE_REGULATION_OF_KERATINOCYTE_DIFFERENTIATION	6388.38	6163.58	6338.35	5179.58	5005.99	4738.04	4544.08	8036.85	8215.21	6548.93	6438.41	6666.12	6295.95	6665.91	7998.36
GO_MAINTENANCE_OF_SISTER_CHROMATID_COHESION	6387.07	7222.49	7196.13	6870.22	6948.46	6910.27	7406.81	4700.95	4721.3	4541.23	3155.21	5921.78	6090.03	6456.42	6317.73
GO_IMMUNE_RESPONSE_REGULATING_CELL_SURFACE_RECEPTOR_SIGNALING_PATHWAY	6386.97	6616.35	6329.42	6434.77	6151.52	6339.17	5979.28	7088.25	6818.9	3940.93	4793.58	7578.99	7484.43	6602.28	5686.65
GO_REGULATION_OF_DEPHOSPHORYLATION	6384.23	6146.97	6191.27	6373.11	6076.72	6411	6395.35	7033.75	6936.91	6672.81	6477.08	6285.52	6253.26	6206.17	6395.72
GO_REGULATION_OF_CELL_GROWTH_INVOLVED_IN_CARDIAC_MUSCLE_CELL_DEVELOPMENT	6384.06	6977.2	6617.25	6805.98	6631.5	6078.35	5471.39	6249.04	6755.82	5754.87	6475.16	5202.39	5493.06	6292.96	7152.99
GO_DNA_TEMPLATED_TRANSCRIPTION_ELONGATION	6381.94	6233.6	6122.93	6391.08	6363.13	6561.55	6090.56	6810.39	6818.41	6372.8	5923.79	6680.69	6758.27	6745.81	5922.9
GO_POSITIVE_REGULATION_OF_G1_S_TRANSITION_OF_MITOTIC_CELL_CYCLE	6381.35	7378.79	6861.88	6536.87	6448	6650.28	6187	6001.56	6241.65	5063.72	5562.37	6917.34	6314.7	7394.68	5725.63
GO_NATURAL_KILLER_CELL_DIFFERENTIATION	6379.15	7034.99	6340.5	6944.86	6417.8	6951.93	6786.62	5411.73	6173.9	3148.11	3619.54	6533.46	6222.13	6506.96	5213.41
GO_POSITIVE_REGULATION_OF_EXOCYTOSIS	6373.56	6288.74	6319.65	6427.48	6301.47	6634.68	6807.35	6897.56	6830.55	6574.92	5954.56	5344.91	5506.79	6037.15	6808.29
GO_REGULATION_OF_ATPASE_ACTIVITY	6372.94	6785.27	6250.78	6366.39	6122.65	6457.83	5802.28	6955.96	6263.58	6972.12	6452.17	6379.49	5938.15	6428.27	5676.95
GO_LEUKOTRIENE_METABOLIC_PROCESS	6369.88	6801.46	6790.23	6470.52	6934.57	6618.19	7133.15	5668.67	5952.33	6408.49	6331.27	5370.93	4505.17	6251.26	5645.81
GO_REGULATION_OF_INOSITOL_PHOSPHATE_BIOSYNTHETIC_PROCESS	6369.81	7901.19	8276.53	8828.02	8301.83	5849.55	6148.68	4092.61	5884.02	3416.33	3426.18	6590.94	7106.46	7844.58	4464.7
GO_PROTEIN_LOCALIZATION_TO_PLASMA_MEMBRANE	6366.91	6212.39	6198.69	6298.62	5994.48	6270.62	6380.96	7422.72	7271.39	7121.26	7048.22	6352.87	6301.52	6944.39	7309.02
GO_T_CELL_APOPTOTIC_PROCESS	6365.72	5938.16	5745.58	6764.99	6358.41	6382.03	6373.03	7936.98	7368.27	5106.33	6111.87	7268.77	6965.04	6011.68	5255.12
GO_PEPTIDYL_THREONINE_MODIFICATION	6364.83	6218.89	6254.73	6412.16	6167.43	6425.76	6403.25	6695.17	6951.64	6082.05	6117.39	6667.06	6670.97	6323.18	6326.41
GO_CELL_AGING	6364.78	6567.1	6529.01	6661.63	6502.81	6170.85	6153.96	6578.03	6244.6	5742.37	5803.88	6484.95	6122.27	6596.2	6037.38
GO_REGULATION_OF_SMALL_MOLECULE_METABOLIC_PROCESS	6363.84	6266.68	6458.92	6590.21	6328.18	6399.5	6189.05	6568.79	6622.34	6191.68	6450.22	6268.39	6316.17	6882.64	6297.14
GO_POSTTRANSCRIPTIONAL_REGULATION_OF_GENE_EXPRESSION	6363.45	6398.59	6421.38	6503.16	6246.26	6334.59	6137.22	6395.84	6252.29	5613.62	5881.79	6392.31	6409.52	6656.99	6219.66
GO_REGULATION_OF_PHOSPHATIDYLINOSITOL_3_KINASE_SIGNALING	6360.71	6454.79	6159.15	6730.58	6363.16	6381.23	6358.26	6762.34	7085.51	5923.89	6116.06	6231.36	6205.04	6370.67	6221.95
GO_CELLULAR_CARBOHYDRATE_METABOLIC_PROCESS	6359.83	6181.42	6426.98	6563.92	6379.18	6613.87	6572.28	6340.49	6463.52	6129.95	5890.97	6186.74	6124.19	6477.33	6061.48
GO_GLUCOSE_METABOLIC_PROCESS	6358.52	5687.07	6112.31	6367.84	6199.58	6516.89	6279.81	6614.59	6977.4	6366.98	6460.88	6053.88	6350.06	6472.66	6218.98
GO_NEGATIVE_REGULATION_OF_NEURON_DEATH	6357.89	6364.17	6437.3	6328.88	6234.38	5912.73	5966.02	6626.74	6679.29	6650.42	6351.61	5964.91	5902.87	6682.55	6435.89
GO_POLY_A_PLUS_MRNA_EXPORT_FROM_NUCLEUS	6356.81	6375.93	6491.5	7159.02	6089.28	5899.24	6164.04	6058.7	6337.69	5932.46	6808.13	6629.72	6857.77	6528.43	5953.29
GO_NEGATIVE_REGULATION_OF_TOLL_LIKE_RECEPTOR_4_SIGNALING_PATHWAY	6350.43	7567.5	7375.73	6295.84	7184.71	5205.59	4872.64	6411.88	6405.01	5374.37	6419.95	6585.29	6267.1	4447.7	5226.31
GO_HYALURONAN_BIOSYNTHETIC_PROCESS	6349.76	6002.35	6084.79	7036.36	6873.88	5832.15	5531.82	6801.28	6087.8	6247.89	7465.3	6446.02	6253.49	6920.52	7167.77
GO_LIPID_PHOSPHORYLATION	6349.67	5980.53	6322.88	6309.26	6015.58	6466.15	6376.45	7248.04	6967.3	5797.92	5868.67	6896.11	6871.82	7039.61	4769.93
GO_POSITIVE_REGULATION_OF_CELLULAR_COMPONENT_ORGANIZATION	6348.34	6329.79	6328.92	6366.89	6148.49	6282.73	6270.62	6909.19	6783.12	6511.89	6448.6	6191	6121.68	6521.59	6381.4
GO_RESPONSE_TO_INSECTICIDE	6345.52	6580.2	6273.93	6107.09	6412.51	6315.85	6229.79	6375.18	6153.51	7227.68	7293.77	5429.21	5548.97	6578.11	6419.49
GO_REGULATION_OF_SUPRAMOLECULAR_FIBER_ORGANIZATION	6343.82	6305.73	6233.45	6381.91	6064.55	6240.61	6248.83	6802.99	6874.31	6788.43	6858.72	6145.44	6248.85	6514.48	6752.39
GO_NEGATIVE_REGULATION_OF_HISTONE_METHYLATION	6342.81	6678.19	6168.96	6472.06	6615.65	5765.63	5334.41	6341.33	6788.72	5329.99	6008.94	6664.5	6996.32	6344.29	5975.61
GO_REGULATION_OF_GLUCOSE_TRANSMEMBRANE_TRANSPORT	6342.33	6751.46	6737.51	6856.33	6651.55	6294.19	6390.47	5108.58	5851.6	4910	5631.97	5701.94	5806.73	6779.89	6957.15
GO_REGULATION_OF_LIPID_METABOLIC_PROCESS	6341.97	6332.96	6413.28	6609.3	6314.47	6227.01	6118.72	6461.27	6600.03	6350.97	6370.87	6051.71	6136.81	6840.94	6086.51
GO_EXECUTION_PHASE_OF_APOPTOSIS	6340.42	5523.83	5587.12	6315.57	5557.74	6525.55	6445.01	6365.28	6826.93	5127.27	5615.15	6636.87	6832.32	7381.16	6038.85
GO_RESPONSE_TO_CHEMOKINE	6339.43	6482.57	6202.3	6929.83	6885.43	5474.9	5563.19	6338.48	6340.39	5262.8	5949.02	6932.29	6382.3	6602.85	5020.13
GO_ESTABLISHMENT_OF_PROTEIN_LOCALIZATION_TO_CHROMOSOME	6338.51	6241.83	6155.19	6339.94	6468.51	6209.87	5933.54	7218.15	6179.27	7552.32	7465.5	6429.86	6177.35	7524.26	6337.08
GO_VITAMIN_BIOSYNTHETIC_PROCESS	6336.93	6323.43	6816.2	5868.31	5697.95	4921.44	4458.77	7410.38	7761.46	5714.41	6999.62	6762.39	6350.43	7011.18	5164.9
GO_PROTEIN_K63_LINKED_DEUBIQUITINATION	6334.01	6320.01	6143.25	5273.78	6007.4	6348	6075	6476.96	6558.58	6232.76	6618.83	6724.35	6432.69	7039.14	6276.6
GO_REGULATION_OF_SPINDLE_ORGANIZATION	6333.94	6275.15	6141.14	6178.68	5754.94	6589.05	6392.74	7349.88	6248.19	7227.37	6520.17	6449.79	6101.3	6262.62	6948.98
GO_RESPONSE_TO_CORTICOSTEROID	6331.65	6164.82	6157.82	6546.84	6192.15	6037.67	6165.09	6559.78	6730.59	6759.13	6546.8	5821.74	5710.39	6471.15	6669.43
GO_RESPONSE_TO_CADMIUM_ION	6329.85	5131.01	5220.63	6315.74	5964.66	6546.23	6343.97	7314.5	6516.42	6423.31	7027.34	5863.06	5846.08	6628.78	5917.99
GO_AMINO_ACID_IMPORT	6329.53	7562.73	7467.33	6922.52	6516.12	5580.31	5579.75	6142.94	5696.23	7037.85	7093.24	5968.38	5610.68	8438.19	4937.28
GO_CELLULAR_RESPONSE_TO_THYROID_HORMONE_STIMULUS	6329.16	6421.91	6095.31	5739.2	5372.93	5683.1	5904.9	7865.97	7816	7294.49	7895.48	6236.42	6547.09	7611.26	6031.3
GO_CELLULAR_RESPONSE_TO_HORMONE_STIMULUS	6328.37	6245.23	6212.9	6420.72	6266.8	6243.99	6236.64	6547.3	6492.4	6455.32	6389.93	6043.45	6015.1	6638	6645.23
GO_RESPONSE_TO_OXYGEN_CONTAINING_COMPOUND	6326.7	6297.47	6342.8	6486.32	6230.79	6269.66	6310.6	6872.36	6822.71	6240.21	6519.57	6305.97	6213.75	6621.41	6375.59
GO_POSITIVE_REGULATION_OF_ALCOHOL_BIOSYNTHETIC_PROCESS	6325.76	7479.75	7525.15	8179.05	7866.49	6072.59	6156.93	4916.31	6286.01	4315.51	5402.08	6365.5	6539.54	7111.24	4869.59
GO_TELENCEPHALON_GLIAL_CELL_MIGRATION	6323.9	5275.12	5284.76	6244.66	5310.49	5978.8	6501.49	6285.14	6986.5	6759.17	6911.63	7012.17	7566.55	5834.51	6362.66
GO_REGULATION_OF_KINASE_ACTIVITY	6321.12	6275.48	6314.92	6380.28	6158.47	6233.07	6205.54	6931.73	6632.68	6368.18	6361.7	6327.32	6146.61	6388.06	6199.75
GO_FIBROBLAST_PROLIFERATION	6317.61	6070.15	6093.38	6286.67	6417.99	5731.03	5692.61	7211.25	6740.12	6354.8	6270.07	6511.41	6348.54	6765.04	5614.38
GO_RESPONSE_TO_CALCIUM_ION	6317.09	6541.29	6329.03	6358.65	6318.62	5611.41	5683.52	6259.38	6315.57	6331.27	6411.97	6055.39	5926.45	6743.08	5971.69
GO_NEGATIVE_REGULATION_OF_LYMPHOCYTE_MEDIATED_IMMUNITY	6316.14	6003.27	5620.23	6542.44	6176.16	7299.74	7013.86	6835.16	6456.12	3928.26	5461.36	7335.02	7174.4	5539.15	5910.83
GO_REGULATION_OF_CLATHRIN_DEPENDENT_ENDOCYTOSIS	6315.45	5851.01	5966.14	6280.16	5848.77	6644.58	6350.73	6364.69	6459.05	5560.47	5541.85	6756.52	6684.76	6836.32	5631.72
GO_ORGANONITROGEN_COMPOUND_CATABOLIC_PROCESS	6315.32	5979.5	6059.03	6137.7	6021.82	6269.46	6138.91	6834.7	6585.01	6402.14	6528.45	6361.18	6106.1	6639.04	6407.09
GO_GLOBAL_GENOME_NUCLEOTIDE_EXCISION_REPAIR	6312.59	5793.18	5662.33	5808.02	5940.83	6406.04	6408.35	6476.43	6219.13	7585.59	6415.59	5815.08	5529.2	7303.18	6905.3
GO_REGULATION_OF_HYDROLASE_ACTIVITY	6312.2	6143.82	6124.67	6424.04	6125.85	6197.25	6266.8	6814.75	6729.19	6466.37	6357.61	6160.1	6009.05	6649.01	6433.39
GO_RESPONSE_TO_TUMOR_CELL	6310.71	5200.24	5313.71	6285.92	5416.64	6964.9	6060.73	8025.69	7190.58	6327.17	7226.2	7979.11	8080.1	6294.25	3404.64
GO_DISRUPTION_OF_CELLS_OF_OTHER_ORGANISM_INVOLVED_IN_SYMBIOTIC_INTERACTION	6309.09	7758.72	7168.35	6365.21	5815.05	6218.53	7125.7	7206.36	8069.52	5827.75	6252.98	3000.6	2121.98	3920.83	6376.55
GO_MONOCYTE_CHEMOTACTIC_PROTEIN_1_PRODUCTION	6308.89	6090.32	5816.71	6739.45	6268.44	5806.38	5407.15	6349.34	6362.9	6547.88	7579.41	5590.8	5544.92	6359.7	7158.22
GO_VESICLE_LOCALIZATION	6308.31	6298.5	6132.39	6203.2	6045.41	6851.22	6762.11	6714.92	6318.11	6499.22	6271.64	6179.03	5994.99	6467.88	6493.86
GO_REGULATION_OF_TRANSFERASE_ACTIVITY	6307.26	6230.15	6298.66	6358.59	6102.84	6235.84	6171.55	6969.88	6636.33	6326.02	6315.86	6359.36	6140.26	6376.97	6158.88
GO_REGULATION_OF_PROTEIN_LOCALIZATION	6304.56	6229.63	6264.96	6391.7	6189.24	6325.39	6244.15	6850.11	6733.34	6400.96	6392.57	6163.63	6172.55	6514.86	6283.72
GO_REGULATION_OF_CELLULAR_LOCALIZATION	6304.21	6117.68	6103.27	6283.52	6077.7	6324.91	6251.37	7008.75	6657.57	6654.32	6535.93	6268.36	6237.02	6474.8	6327.53
GO_NEUROTRANSMITTER_METABOLIC_PROCESS	6303.82	6312.42	6476.66	6339.2	6068.1	5528.77	5561.7	6886.48	6537.15	5769.68	6311.82	6295.82	5881.47	6408.47	6155.17
GO_REGULATION_OF_MYOTUBE_DIFFERENTIATION	6303.73	6422.84	6784.31	6438.57	6039.65	6430.61	6865.26	7279.62	6677.14	5661.22	5887.3	6184.63	6073.24	6025.75	5357.31
GO_MONOSACCHARIDE_METABOLIC_PROCESS	6303.07	5503.69	5837.62	6211.51	5979.43	6376.86	6251.35	6395.31	6625.46	6354.79	6388.8	5837.19	6039.69	6483.19	6373.49
GO_REGULATION_OF_TISSUE_REMODELING	6301.76	6404.49	6303.63	6299.9	5997.33	6430.64	6218.09	6198.12	6558.91	4529.52	6190.58	6577.08	6481.87	6444.7	6118.67
GO_PHOSPHATIDYLINOSITOL_DEPHOSPHORYLATION	6299.75	6304.13	6108.02	6538.18	6463.81	6295.36	6446.85	6071.09	5360.12	6777.63	4592.52	6169.82	5674.37	6428.66	7046.46
GO_REGULATION_OF_PLATELET_ACTIVATION	6298.58	6831.35	6412.61	6686.88	6638.15	6184.56	6131.45	6795.2	7131.09	5231.97	5804.39	5833.89	5666.99	7580.05	5718.58
GO_MORPHOGENESIS_OF_AN_EPITHELIAL_SHEET	6298.51	6132.2	6311.42	6406.84	6285.59	6411.36	6402.32	6552.22	6744.85	6027.48	6058.35	5833.85	5964.55	6692.49	6237.31
GO_EXIT_FROM_MITOSIS	6298.15	6492.97	6199.04	6179.39	6202.97	6967.63	6404.22	7925.98	7801.62	6393.34	5952.23	6946.51	5775.19	5312.78	5795.69
GO_REGULATION_OF_CELL_MATRIX_ADHESION	6296.47	6074.48	6019.29	6464.24	6161.96	5769.69	5904.66	6932.63	7023.77	6955.64	6473.55	5773.71	5513.88	6996.74	6430.97
GO_POSITIVE_REGULATION_OF_LIPID_METABOLIC_PROCESS	6292.74	6311.65	6336.32	6872.39	6637.89	6070.14	6156.15	5884.24	6457.7	6095.85	6589.03	6120.82	6262.89	7010.31	6273.83
GO_CELLULAR_AMIDE_METABOLIC_PROCESS	6292.41	6279.23	6239.9	6409.64	6056.61	6193.2	5890.81	6821.88	6305.58	6607.74	6797.16	6248.31	5968.09	7272.88	6682.09
GO_PLATELET_DERIVED_GROWTH_FACTOR_RECEPTOR_BETA_SIGNALING_PATHWAY	6290.14	5973.45	6198.34	6679.59	6359.15	6292.9	5938.29	7564.77	7056.49	5170.57	6287.38	8170.83	8323.57	6237.23	3977.86
GO_NEUROTROPHIN_TRK_RECEPTOR_SIGNALING_PATHWAY	6289.24	5850.18	5881.28	6374.61	5752.84	6313.78	6379.27	6318.35	7229.47	5997.67	6442.59	6160.6	6264.71	6208.68	6731.05
GO_HISTONE_H3_K4_METHYLATION	6288.73	6458.71	5852.36	5971.9	5854.8	6798.81	6224.67	6920.37	6972.52	6352.79	6043.25	6384.23	6360.39	6168	4898.79
GO_CELLULAR_PROTEIN_CONTAINING_COMPLEX_ASSEMBLY	6288.71	6216.52	6062.8	6148.56	5882.57	6268.02	5970.64	7141.92	6758.19	7014.85	6797.82	6309.4	6092.06	6545.84	6369.95
GO_POSITIVE_REGULATION_OF_DOUBLE_STRAND_BREAK_REPAIR	6285.68	5530.67	4891.48	5846.58	5512.72	6368.99	6202.36	7113.48	6899.21	6667.6	5626.77	6855.28	6430.32	6861.28	5417.06
GO_NEGATIVE_REGULATION_OF_LIPASE_ACTIVITY	6285.4	6389.54	7368.89	6972.18	6185.31	5601.32	7215.97	5691.78	6385.5	5848.39	6433.74	4691.76	5928.8	6797.91	5338.65
GO_REGULATION_OF_PROTEIN_TARGETING_TO_MEMBRANE	6285.19	5280.91	5748.01	5954.44	5112.1	6271.88	6298.49	7087.56	7038.66	7505.28	6723.36	6173.05	6601.48	5888.41	7105.26
GO_CONNECTIVE_TISSUE_REPLACEMENT	6283.25	6648.13	6251.15	6897.15	7244.56	7823.98	6315.35	5866.31	5321.24	6118.03	6650.65	6161.42	5399.06	6002.18	6505.52
GO_REGULATION_OF_INTRACELLULAR_STEROID_HORMONE_RECEPTOR_SIGNALING_PATHWAY	6282.74	5979.54	6089	6138.03	6121.2	6402	6163.47	6765.19	6816.14	6815.83	6410.97	6095.18	5962.69	6641.21	6595.57
GO_REGULATION_OF_CELL_CYCLE_G1_S_PHASE_TRANSITION	6282.62	6378.71	6271.83	6293.41	6117.38	6376.01	6132.14	6456.85	6492.07	5004.68	5484.06	6400.36	6178.17	6323.5	6071.8
GO_EXTRACELLULAR_MATRIX_DISASSEMBLY	6282.56	6407.5	6476.46	6436.12	6327.48	6253.37	6311.75	6071.29	6480.22	3165.65	4632.78	5487.08	5339.59	7052.5	5469.61
GO_SMOOTH_MUSCLE_CELL_APOPTOTIC_PROCESS	6282.43	6972.2	7541.41	6656.73	6832.97	6568.77	6375.31	4749.02	4715.77	4654.31	4700.2	5958.82	6340.5	5860.14	6224.36
GO_MODIFICATION_OF_POSTSYNAPTIC_STRUCTURE	6281.33	6376.83	6059.66	6185.82	5984.18	6057.31	5756.16	8221.74	7916.46	9003.94	7468.67	5461.55	5133.66	7095.55	7910.38
GO_RESPONSE_TO_AMINO_ACID	6280.99	6259.01	6420.6	6352.12	6082.79	5943.64	5865.3	6302.98	6403.81	6930.67	6461.84	5568.57	5536.46	6408.06	5753.71
GO_POSITIVE_REGULATION_OF_SECRETION	6280.77	6331.92	6373.26	6525.76	6341.17	6394.15	6397.33	6214.2	6530.59	5691.62	5815.49	5919.25	5891.01	6229.63	5957.84
GO_HOMOTYPIC_CELL_CELL_ADHESION	6277.97	6637.1	6390.41	6095.99	5899.9	5711.91	5855.1	6773.13	6850.41	5566.11	6116.78	6233.37	6322.56	6832.35	6633.34
GO_CHAPERONE_MEDIATED_PROTEIN_TRANSPORT	6277.01	6654.92	5311.13	6681.57	5975.24	6235.77	5555.09	6469.66	5234.43	6556.48	6318.25	5981.22	6472.25	6338.67	4238.1
GO_REGULATION_OF_GENERATION_OF_PRECURSOR_METABOLITES_AND_ENERGY	6276.2	5916.81	6004.57	6306.52	6166.68	6273.25	5955.72	6749.17	6183.35	6552.21	6350.54	6279.15	6256.29	6581.48	6527.87
GO_COVALENT_CHROMATIN_MODIFICATION	6269.17	6201.16	6182.07	6291.73	6158.29	6446.16	6406.8	6672.17	6604.52	6393.25	5851.86	6160.24	6246.61	6303.79	6222.75
GO_DEVELOPMENTAL_CELL_GROWTH	6269.13	6068.58	6025.52	6327.24	6054.4	6146.27	6211.02	6393.03	6389.45	6394.37	6407.1	5603.61	5561.07	6479.14	6413.11
GO_PLASMA_MEMBRANE_ORGANIZATION	6268.61	6232.68	6291.98	5988.24	5627.68	6390.17	6549.37	7498.36	7072.85	6895.62	6338.81	6231.74	5889.56	6245.25	5965.16
GO_L_AMINO_ACID_TRANSPORT	6268.31	6989.2	6963.62	6768.71	6512.06	6030.93	6202.86	6333.77	6537.6	5906.16	5930.43	5946.71	5760.08	6807.5	4526.37
GO_BONE_REMODELING	6266.89	6437.13	6259.49	6195.29	6049.16	6274.29	6297.91	6901.15	6988.93	5384.86	5976.02	6221.26	6327.45	6533.49	6164.49
GO_CELLULAR_RESPONSE_TO_VIRUS	6264.06	6248.08	5828.78	6456.74	6196.44	6280.04	6468.7	6513.81	6408.8	5633.93	5987.44	7134.4	7021.62	6170.98	5703.65
GO_POLYSACCHARIDE_METABOLIC_PROCESS	6263.62	6194.05	6250.93	6320.34	6276.31	6410.31	6564.87	6005.32	6097.96	6468.7	6360.83	5574.68	5633.11	5943.02	6501.23
GO_NEGATIVE_REGULATION_OF_PROTEIN_METABOLIC_PROCESS	6262.52	6226.98	6240.92	6421.53	6207.96	6073.25	6110.18	6817.61	6523.06	6284.12	6329.06	6075.37	5948.21	6469.21	6565.43
GO_CELLULAR_RESPONSE_TO_LEPTIN_STIMULUS	6259.84	7109.08	6541.63	6128.49	6663.02	7184.71	6786.48	5427.7	5449.07	6630.02	6391.18	4697.96	4645.31	6053.07	5588.19
GO_REGULATION_OF_SYSTEMIC_ARTERIAL_BLOOD_PRESSURE_BY_RENIN_ANGIOTENSIN	6257.26	5653.41	5647.1	6993.61	6620.42	6668.96	6417.11	7522.56	7373.54	5412.6	6097.41	5618.07	5605.55	7787.39	4750.48
GO_CELLULAR_SENESCENCE	6256.83	6438.74	6435.56	6732.68	6401.66	5928.22	6013.14	6520.89	6306	5982.21	5239.58	6207.66	5751.36	6306.32	5820.42
GO_PROTEIN_LOCALIZATION_TO_NUCLEOLUS	6256.3	6975.96	7440.74	5906.9	6132.45	5819.87	4155.77	7597.51	7366.06	7331.96	5822.49	6157.14	6355.47	7801.86	6096.45
GO_POSITIVE_REGULATION_OF_CALCIUM_ION_IMPORT	6256.23	5469.54	6021.62	6390.96	6414.62	6030.24	6121.5	6600.06	7017.87	3894.11	5974.15	6811.41	6624.03	6690.01	5378.35
GO_NEGATIVE_REGULATION_OF_PROTEIN_POLYMERIZATION	6255.41	6503.68	5801.82	6208.13	6133.78	6125.82	6164.89	6634.31	6544.79	5872.26	6167.36	6559.2	6302.69	6500.8	7054.3
GO_IMMUNOGLOBULIN_PRODUCTION_INVOLVED_IN_IMMUNOGLOBULIN_MEDIATED_IMMUNE_RESPONSE	6254.49	6290.47	6100.48	6915.2	6498.95	6281.95	5790.55	6308.02	6046.51	3978.24	5016.17	6466.86	6227.02	6824.74	5103.44
GO_MYOBLAST_MIGRATION	6254.27	6035.42	6473.11	5563.72	5378.28	5362.83	5549.98	7982.57	8357.77	8184.52	7639.58	5869.1	5795.26	6851.07	7840.38
GO_HEAT_GENERATION	6253.54	5869.15	5751.64	6787.3	6727.29	4193.48	4224.46	6272.43	6424.24	7180.91	7214.22	6234.64	5120.16	6658.86	5276.46
GO_LEUKOCYTE_MIGRATION	6252.29	6394	6259.22	6245.36	6125.64	5729.7	5811.45	6635.89	6692.52	4455.16	5317.98	7016.17	6654.43	6460.98	5681.12
GO_RESPONSE_TO_CARBOHYDRATE	6251.78	6052.2	6185.44	6586.09	6452.44	6219.48	6245.77	6257.79	6343.87	6613.47	6547.27	5817.05	5847.35	6631.09	6087.02
GO_REGULATION_OF_CELL_KILLING	6251.71	6475.49	5994.51	6823.32	6275.23	6542.79	6395.71	6509.18	6313.39	3153.4	4676.1	6228.18	5954.21	5645.61	4989.74
GO_REGULATION_OF_T_CELL_APOPTOTIC_PROCESS	6250	6063.51	6049.08	7039.89	6531.24	6227.86	6272.15	7734.67	7203.58	5246.44	5966.44	7122.11	6878.15	5772.04	4507.36
GO_RESPONSE_TO_ABIOTIC_STIMULUS	6249.85	6231.95	6212.01	6382.55	6196.51	6106.09	6036.76	6726.76	6585.41	6641.52	6585.71	6209.03	6004.09	6560.71	6267.75
GO_CARBOHYDRATE_BIOSYNTHETIC_PROCESS	6248.92	6147.19	6394.19	6291.28	6229.11	6258.64	6163.58	6311.66	6685.27	6239.19	6146.09	5822.43	6015.38	6333.86	6274.1
GO_CELLULAR_RESPONSE_TO_OXYGEN_CONTAINING_COMPOUND	6247	6178.65	6233.73	6436.84	6260.27	6146.23	6219.83	6611.12	6601.49	6109.84	6341.24	6264.94	6216.81	6412.34	6187.79
GO_REGULATION_OF_KERATINOCYTE_DIFFERENTIATION	6246.78	5635.78	5519.41	5229.54	4845.66	5205.55	5476.26	8242.58	7453.23	6764.46	6788.66	6468.82	6024.73	6803.12	7322.99
GO_REGULATION_OF_HORMONE_METABOLIC_PROCESS	6244.42	6431.44	6145.07	6385.15	6311.03	5968.97	5985.41	6998.26	7408.06	5295.14	6294.63	6324.84	6194.21	5684.27	5855.75
GO_ASTROCYTE_DIFFERENTIATION	6243.83	6623.43	6531.85	6703.15	6826.1	6097.94	5847.27	6040.99	6343.85	5891.31	7043	5630.82	5654.27	6143.82	6443.24
GO_ACTIVATION_OF_PROTEIN_KINASE_ACTIVITY	6243.45	6177.99	6195.87	6416	6197.06	6080.35	6254.24	6761.06	6711.81	6190.67	6460.76	6262.98	6127.53	6369.45	6232.66
GO_REGULATION_OF_CYTOPLASMIC_TRANSLATION	6238.04	6293.55	5814.9	6368.11	5670.5	6204.95	6134.06	6577.13	6166.65	7389.55	6709.97	6271.12	5664.57	7220.05	5823.13
GO_POSITIVE_REGULATION_OF_TRANSPORT	6237.92	6177.39	6244.78	6434.25	6233.76	6242.08	6281.79	6570.29	6604.38	5989.56	6229.91	6171.33	6142.66	6452.72	6195.46
GO_INTERLEUKIN_13_PRODUCTION	6237.28	5555.15	5452.67	6299.22	6357.55	6175.34	6426.48	7441.69	7193.98	5488.61	5370.31	7530.02	7181.45	5990.36	5710.14
GO_ANTIGEN_RECEPTOR_MEDIATED_SIGNALING_PATHWAY	6235.72	6408.39	6136.26	6335.18	6014.09	6120.87	5660.07	7060.63	6815.51	3336.25	4417.05	7585.44	7491.73	6731.25	5041.6
GO_POSITIVE_REGULATION_OF_RECEPTOR_MEDIATED_ENDOCYTOSIS	6235.1	6035.82	5650.09	6804.93	6528.59	6611.69	6791.34	5823.27	5925.4	6016.59	6434.37	5698.08	5676.88	6943.84	7331.2
GO_I_KAPPAB_PHOSPHORYLATION	6234.53	5806.05	5316.4	6313.37	6230.29	5818.42	6238.76	6721.62	6226.05	6708.77	7046	6446.46	6301.86	4948.74	4674.8
GO_POSITIVE_REGULATION_OF_VASCULAR_ASSOCIATED_SMOOTH_MUSCLE_CELL_MIGRATION	6234.19	6099.66	5858.16	6735.58	6802.15	6774.5	6843.23	5620.53	6999.08	4863.29	5526.05	6212.31	5976.63	6639.04	6256.06
GO_NEGATIVE_REGULATION_OF_TOR_SIGNALING	6233.56	6649.11	6880.57	6438.93	6671.95	6282.66	6112.44	6084.72	6273.39	6193.73	5193.44	5552.14	5612.58	7022.51	5826.32
GO_CELLULAR_RESPONSE_TO_ABIOTIC_STIMULUS	6231.33	6130.64	6101.27	6250.68	6131.65	6310.18	6255.32	6789.07	6637.52	6786.88	6450.48	6070.31	5941.74	6211.98	6097.28
GO_PROTEIN_CONTAINING_COMPLEX_DISASSEMBLY	6230.49	6136.68	6134	6041.2	5799.31	6416.85	6049.1	7127.07	6634.73	6997.63	6996.12	6308.67	6069.9	6859.06	6152.31
GO_POSITIVE_REGULATION_OF_MAP_KINASE_ACTIVITY	6230.38	6201.62	6225.65	6473.56	6310.7	6063.24	6210.21	6603.77	6492.1	6172.81	6486.4	6076.52	6067.17	6289.17	6235.11
GO_DNA_BIOSYNTHETIC_PROCESS	6227.88	5950.01	6041.92	6226.14	6027.45	6472.99	6207.61	7168.74	6562.09	6229.61	5934.75	6734.24	6497.23	6239.19	5602.72
GO_PROTEIN_PROCESSING	6226.88	6015.93	5897.28	6290.31	5902.01	6163.45	6329.89	6821.61	6313.6	6339.18	6398.58	5445.79	5368.41	6986.69	6117.98
GO_BETA_CATENIN_DESTRUCTION_COMPLEX_DISASSEMBLY	6225.54	5744.47	6464.09	5569.17	5404.96	6382.31	6297.62	6060.5	6386.06	5541.28	6153.46	6992.22	6746.05	6925.89	5576.99
GO_REGULATION_OF_CALCIUM_MEDIATED_SIGNALING	6225.47	6262.34	6202.83	6603.9	6474.67	5968.75	5741.62	6876.84	6753.77	5059.72	6066.92	6248.11	6123.66	6617.57	5858.28
GO_NEGATIVE_REGULATION_OF_MUSCLE_CELL_APOPTOTIC_PROCESS	6222.46	6173.92	6730.25	6271.01	6077.23	6154.3	6792.31	5835.94	6438.87	5483.32	5423.51	5873.32	6274.64	6468.81	6547.16
GO_NAD_BIOSYNTHESIS_VIA_NICOTINAMIDE_RIBOSIDE_SALVAGE_PATHWAY	6221.04	5978.29	6598.88	6869.24	6093.15	5538.88	6348.93	6790.72	5670.35	5678.45	6641.71	5231.92	5205.5	6838.29	7577.37
GO_ADAPTATION_OF_SIGNALING_PATHWAY	6219.88	5909.08	5996.33	6443.42	7113.14	6776.02	6811.52	5386.31	5731.24	7655.06	6723.28	4770.18	5638.79	5919.84	6452.89
GO_PROTEIN_LOCALIZATION_TO_MICROTUBULE_ORGANIZING_CENTER	6218.11	6191.01	6043.67	5882.75	6050.54	6190.98	6633.39	7783.24	6648.61	6290.63	5113.67	6470.15	6245.22	6289.91	4350.22
GO_PROTEIN_CONTAINING_COMPLEX_ASSEMBLY	6217.41	6197.73	6060.09	6203.69	5909.64	6231.13	6090.42	6982.03	6704.02	6843.92	6726.56	6190.22	6015.54	6543.13	6373.62
GO_REGULATION_OF_BONE_REMODELING	6217	6374.07	6319.97	6114.02	5579.49	5901.75	6084.21	6405.29	6840.37	3838.11	5639.51	6412.2	6362.81	6507.56	5787.87
GO_NEGATIVE_REGULATION_OF_ALPHA_BETA_T_CELL_PROLIFERATION	6216.3	5434.68	5786.55	6938.15	6578.26	6147.71	6792.15	8324.04	7050.19	5456.14	6382.91	6284.89	5689.19	5615.74	5747.76
GO_RIBONUCLEOSIDE_METABOLIC_PROCESS	6214.74	5375.42	5360.43	5891.2	5707.52	6356.7	6106.31	7183.84	6721.11	6411.7	6323.16	6576.56	6395.75	5491.54	5092.74
GO_RESPONSE_TO_X_RAY	6213.63	6628.46	6639.35	6211.84	6022.73	5970.37	5541.07	6965.65	6045.01	5084.39	5372.05	6831.64	6215.42	7138.2	6375.59
GO_NEGATIVE_REGULATION_OF_LIPOPROTEIN_PARTICLE_CLEARANCE	6212.28	5589.41	6387.81	6693.91	6036.75	7257.62	6503.62	5149.18	8395.61	3980.85	4272.5	5152.3	5770.8	7185.78	6501.08
GO_REGULATION_OF_T_CELL_MEDIATED_CYTOTOXICITY	6211.93	6156.2	5805.89	7675.23	7159.21	6267.67	6361.04	5750.94	5726.16	3690.82	5387.6	6880.11	6685.92	7072.33	6039.23
GO_POSITIVE_REGULATION_OF_NOTCH_SIGNALING_PATHWAY	6210.9	6273.03	5962.24	6814.25	6397.35	5669.03	6168.61	6477.77	6317.13	6253.19	5356.76	5700.08	5602.55	5704.28	6315.54
GO_POSITIVE_REGULATION_OF_PEPTIDYL_TYROSINE_PHOSPHORYLATION	6208.91	6159.46	5893.28	6500.53	6258.36	5623.52	5708.63	6551.71	6767.61	5568.69	6429.02	6650.68	6676.95	5885.74	5719.57
GO_SPINDLE_LOCALIZATION	6207.47	5908.68	5511.46	5184.46	5467.82	6494.21	6457.91	7146.03	6498.71	5787.78	5696.62	6624.63	5957.04	6939.99	6528.96
GO_REGULATION_OF_PH	6205.53	6768.17	6933.95	6606.9	6404.67	6157.74	6253.33	5800.7	6338.56	5503.62	5524.38	6076.4	5774.94	6718.38	5311.74
GO_REGULATION_OF_TRANSCRIPTION_REGULATORY_REGION_DNA_BINDING	6205.21	6299.79	6478.9	6330.93	6050.63	6084.7	5902.77	6655.11	6795.99	6019.86	6206.54	6030.39	6173.31	6203.88	6799.16
GO_MEGAKARYOCYTE_DIFFERENTIATION	6202.52	6096.54	5400.1	6371.7	5861.34	6280.28	6124.75	7231.08	7154.19	4651.82	4831.13	6338.05	6703.15	5974.96	6574.94
GO_CHROMATIN_REMODELING	6202.15	6265.72	6124.67	6250.16	6155.2	6360.8	5967.54	6637.28	6346.81	5810.37	5738.13	6249.11	6098.54	6403.82	6129.86
GO_REGULATION_OF_EXECUTION_PHASE_OF_APOPTOSIS	6201.42	5890.04	6166.38	6289.05	6022.02	6365.97	6032.58	6236.47	6645.51	5267.65	5439.06	6139.21	6411.66	7000.65	6391.81
GO_NEGATIVE_REGULATION_OF_PEPTIDYL_THREONINE_PHOSPHORYLATION	6201.16	4760.02	5256.11	6001.37	5608.7	6217.9	5778.58	7210.59	6989.76	6184.42	6470.45	6801.11	6665.94	5648.79	7516.86
GO_NEGATIVE_REGULATION_OF_NECROTIC_CELL_DEATH	6199.44	5673.01	6277.27	7028.81	6490.9	5273.12	6285.07	6521.56	5782.82	6045.44	6762.91	6116.16	5772.85	6121.61	7009.69
GO_REGULATION_OF_LIPID_CATABOLIC_PROCESS	6197.21	6622.05	6504.62	7076.97	6384.01	6107.54	6145.04	5961.2	7016.91	5600.32	5685.31	5513.34	5989.04	6249.37	6363.02
GO_SEMAPHORIN_PLEXIN_SIGNALING_PATHWAY_INVOLVED_IN_NEURON_PROJECTION_GUIDANCE	6195.66	6146.68	6187.59	5622.48	5233.31	5250.1	5557.59	7821.63	8181.13	8429.17	7846.39	6229.77	6207.94	6203.73	4212.07
GO_PROTEIN_TRANSMEMBRANE_TRANSPORT	6191.61	5668.98	5606.65	6133.84	5667.37	5561.9	5015.1	6516.96	6496.6	6650.04	6321.86	6509.37	5929	6249.39	6558.48
GO_SEMAPHORIN_PLEXIN_SIGNALING_PATHWAY	6189.57	5992.67	6032.33	6583.09	6073.47	5762.24	6038.89	6868.11	6965.82	6734.72	6346.35	6246.05	6133.09	6350.66	5442.47
GO_REGULATION_OF_ORGANELLE_ORGANIZATION	6189.56	6156.15	6107.08	6164.65	5957.36	6224.53	6139.45	6987.81	6661.45	6656.08	6385.25	6214.46	6160.78	6376.41	6123.68
GO_ESTABLISHMENT_OF_CELL_POLARITY	6188.75	5685.55	5693.44	5848.92	5677.95	6264.79	6158.71	6871.83	6572.63	6576.25	6548.08	6162.54	5875.49	6214.96	6938.69
[truncated: 2,897 more rows]

## Sheet: HALLMARK_SS_RNAseq
Name	Median score	S1842_00106_SS_MTM_Plug	S1842_00106_SS_MTM_Whole	S1842_00107_SS_MTM_Plug	S1842_00107_SS_MTM_Whole	S1842_00108_SS_MTM_Plug	S1842_00108_SS_MTM_Whole	S1842_00110_SS_MTM_Plug	S1842_00110_SS_MTM_Whole	S1842_00111_SS_MTM_Plug	S1842_00111_SS_MTM_Whole	S1842_00115_SS_MTM_Plug	S1842_00115_SS_MTM_Whole	S1842_00118_SS_MTM_Plug	S1842_00118_SS_MTM_Whole
HALLMARK_TNFA_SIGNALING_VIA_NFKB	10699.1	10840.8	10823.5	10891.8	10859.2	9941.24	9985.9	10715.6	10774.5	10244.1	10549	10795.9	10682.7	10555.3	9980.11
HALLMARK_INTERFERON_ALPHA_RESPONSE	9825.75	9636.38	9544.04	9674.11	9696.8	9844.59	9806.9	11109.9	10829.2	10286.4	10468.9	11202.4	11186.3	9320.36	8721.69
HALLMARK_INTERFERON_GAMMA_RESPONSE	9787.28	9773.34	9566.78	9771.93	9703.28	9801.23	9821.12	10711.6	10449	9595.33	10020.5	10911.6	10835.1	9401.58	8537.03
HALLMARK_IL6_JAK_STAT3_SIGNALING	9406.05	9448.12	9396.6	9344.84	9411.54	9351.73	9332.82	9713.06	9625.37	8617.79	9400.56	9669.5	9491.57	9543.08	8019.54
HALLMARK_INFLAMMATORY_RESPONSE	9259.55	9433.9	9334.19	9571.8	9502.42	8649.95	8684.79	9399.39	9314.02	8642.27	9220.89	9298.2	9216.8	9113.12	7555.16
HALLMARK_REACTIVE_OXYGEN_SPECIES_PATHWAY	9151.61	9091.23	9401.23	8891.23	8760.77	9086.25	8947.76	9453.05	9386.9	9028.56	9211.98	9253.65	9407.29	9746.48	8765.05
HALLMARK_TGF_BETA_SIGNALING	8907.79	8938.21	8879.86	8910.41	8746.76	8275.79	8292.1	9197.05	9516.35	8905.18	9089.86	8985.49	8849.36	9049.29	8678.42
HALLMARK_APOPTOSIS	8898.36	8907.17	8826.5	9114.57	8723.43	8721.37	8641.92	9454.41	9386.99	8535.69	8914.65	9322.45	9158.78	8889.56	8182.05
HALLMARK_ALLOGRAFT_REJECTION	8770.07	8865.7	8583.72	8976.1	8839.11	8701.03	8484.02	9007.86	8930.35	5961.68	7111.94	9433.37	9283.2	8367.67	6810.39
HALLMARK_UNFOLDED_PROTEIN_RESPONSE	8504.21	8468.96	8625.82	8531.65	8419.17	7868.37	7541.31	8708.1	8584.69	8476.77	8548.59	8632.09	8463.37	8749.99	8434.42
HALLMARK_MTORC1_SIGNALING	8367.73	8448.99	8435.28	8438.05	8362.63	8123.56	7780.56	8605.97	8204.37	8455.07	8372.84	8221.72	7841.63	8620.89	8150.9
HALLMARK_MYC_TARGETS_V1	8351.51	8460.86	8399.88	8327.95	8289.29	8274.11	7708.4	8683.12	8205.06	8263.19	8537.94	8583.57	8296.79	8832.56	8375.08
HALLMARK_COMPLEMENT	8303.53	8241.98	7984.24	8527.82	8250.27	8490.78	8356.78	8694.65	8505.93	7607.14	7889.47	8476.23	8220.83	8369.39	7408.19
HALLMARK_PI3K_AKT_MTOR_SIGNALING	8268.12	8308.57	8171.02	8355.82	8406.32	8481.74	8421.73	8670.07	8245	8291.25	8001.28	8166.4	7928.99	8108	8101.84
HALLMARK_P53_PATHWAY	8054.01	7971.81	8156.08	8048.97	7818.31	7517.86	7616.52	8756.06	8668.84	8504.78	8315.42	8025.86	8059.04	8255.01	7871.07
HALLMARK_HYPOXIA	8009.14	7946.69	7914.44	8302.82	8155.7	7504.36	7503.94	8454.99	8146.28	8238.7	8071.58	7684.02	7585.41	8167.71	7792.77
HALLMARK_IL2_STAT5_SIGNALING	7933.13	7994.59	7999.67	7953.21	7883.44	7611.26	7533.29	8418.46	8299.76	6956.75	7575.96	8134.8	7913.04	7995.41	6436.96
HALLMARK_PROTEIN_SECRETION	7864.09	8052.51	7821.06	7876.23	7851.95	7844.89	7691.64	8086.78	7648.97	8245.96	8216.73	7900.2	7452.03	8795.77	7728.87
HALLMARK_UV_RESPONSE_UP	7731.54	7857.6	7802.73	8064.54	7697.23	7302.27	7081.39	7815.93	7974.33	7219.58	7374.33	7839.98	7681.42	7765.84	7349.38
HALLMARK_ANDROGEN_RESPONSE	7646.69	7676.87	7616.52	7601.28	7390.4	7305.09	7263.8	8586.75	8173.46	7942.28	8289.8	7268.13	7031.84	8488.14	8080.14
HALLMARK_CHOLESTEROL_HOMEOSTASIS	7578.27	7674.67	7810.79	7592.71	7506.8	7560.16	7374.82	7802.7	7550.75	7869.94	8066.29	7563.83	7405.95	8120.54	7423.07
HALLMARK_OXIDATIVE_PHOSPHORYLATION	7497.29	7179.02	7071.62	7279.73	6897.98	7534.72	7166.42	8135.04	7459.85	8088.85	8017.78	7562.62	7220.27	8530.32	7610.17
HALLMARK_ANGIOGENESIS	7201.05	7041.93	6952.8	7363.24	7242.95	6320.98	7159.14	7405.75	7450.35	7567.33	7934.77	6181.92	5879.23	7798.88	6255.61
HALLMARK_KRAS_SIGNALING_UP	6713.01	6879.26	6596.8	7051.04	6885.38	5879.69	6003.81	7247.03	7085.35	6120.4	6829.21	6386.13	5950.2	7378.75	6226.22
HALLMARK_MITOTIC_SPINDLE	6637.39	6452.09	6352.35	6423.53	6251.15	6918.01	7018.56	7631.28	7291.67	6369.64	5863.13	6971.35	6919.84	6822.7	6264.95
HALLMARK_NOTCH_SIGNALING	6579.15	7283.12	7631.74	6866.63	6618.37	5795.2	5854.57	6167.99	6355.64	5953.46	6539.93	7325.22	7381.49	7426.71	5880.84
HALLMARK_HEME_METABOLISM	6423.45	6350.66	6199.61	6062.41	5909.09	6434.76	6412.14	6833.72	6768.36	6775.11	6812.1	6314.47	5833.72	6851.92	6785.32
HALLMARK_ADIPOGENESIS	6420.53	6043.95	6310.47	6261.99	6087.49	6424.01	6417.06	6716.84	6886.34	7295.22	6978.61	6140.66	5971.62	7472.22	6510.87
HALLMARK_DNA_REPAIR	6286.7	6023.34	6126.69	6055.73	5853.21	6207.38	5663.05	7042.65	6814.14	6451.08	6366.03	6591.16	6382.2	6667.04	5756.22
HALLMARK_KRAS_SIGNALING	6198.53	6510.15	6387.55	6627.79	6888.75	6266	5806.75	5467.65	5951.7	5459.58	5395.19	6397.01	6131.07	6822.26	4224.53
HALLMARK_FATTY_ACID_METABOLISM	5607.04	5248.42	5178.84	5458.62	5196.56	5620.94	5382.12	6367.91	5996.75	6755.73	6785.13	5593.13	5458.91	6608.49	6181.86
HALLMARK_XENOBIOTIC_METABOLISM	5590.29	5262.07	5483.97	5635.36	5330.23	5364.02	5545.21	6290.12	6364.82	6606.68	6739.65	5449.89	5427.73	6905.08	5908.12
HALLMARK_APICAL_JUNCTION	5586.44	5173.66	5030	5735.61	5225.28	5567.11	5605.78	6556	6635.68	6030.96	6207.15	5113.86	4968.06	5435.54	6163.34
HALLMARK_PEROXISOME	5499.34	4881.4	4930.16	5125.01	4815.97	5571.16	5427.51	6290.86	5649.36	6843.5	6026.17	5032.54	5007.66	6325.57	6426.63
HALLMARK_COAGULATION	5376	5163.55	5317.95	5662.37	5434.06	4890.07	5139.9	5672.44	6004.48	4335.58	5644.7	4904.26	4880.13	7137.9	5897.87
HALLMARK_GLYCOLYSIS	5321.34	4947.44	5189.58	5350.7	4717.38	5291.98	5011.87	6332.43	5855.17	6858.31	6133.33	5100.79	4764.1	6068.57	6079.84
HALLMARK_MYC_TARGETS_V2	4969.76	4987.62	5593.81	5020.94	4827.93	4096.08	3002.04	5205.36	5295.4	5038.17	4951.9	4219.85	4262.02	5229.79	4878.26
HALLMARK_G2M_CHECKPOINT	4739.54	4685.99	4581.96	4550.45	4390.28	5349.86	4909.23	6010.07	5070.88	3887.11	3737.45	5758.08	5389.44	4793.09	3767.94
HALLMARK_EPITHELIAL_MESENCHYMAL_TRANSITION	4571.72	4579.76	4587.56	4674.84	4427.75	4060.9	4219.9	5100.46	5450.44	4460.51	5293.83	4392.08	4273.71	5648.09	4563.68
HALLMARK_WNT_BETA_CATENIN_SIGNALING	4508.43	3993.34	4214.66	4527.13	4157.93	3751.12	4149.63	5066.38	5074.67	5539.99	5710.25	4879.53	4813.97	4235.16	4489.72
HALLMARK_UV_RESPONSE_DN	4367.06	4256.14	4163.48	4450.26	3847.67	4234.66	4283.86	5780.56	5559.07	6811.63	6397.95	3947.97	3785.21	5225.39	4600.43
HALLMARK_ESTROGEN_RESPONSE_EARLY	4061.41	4010.1	4112.73	4001.02	3478.64	3525.73	3650.8	6524.6	5849.38	5797.42	5952.17	3579.03	3546.92	5057.65	6642.94
HALLMARK_ESTROGEN_RESPONSE_LATE	4002.4	3962.79	4002.48	3863.14	3318.96	3459.84	3699.77	6600.85	5736.16	5753.48	5656.05	4002.32	3813.43	5355.01	6457.72
HALLMARK_APICAL_SURFACE	3969.75	4081.56	3806.29	3952.74	3669.46	3599.27	3986.76	5504.15	4644.37	5157.9	4541.26	2920.03	2823.16	3803.04	5042.72
HALLMARK_HEDGEHOG_SIGNALING	3925	4009.64	3722.14	4023.29	3840.36	3619.89	3795.28	4051.55	4510.05	5738.56	4649.33	3507.48	3660.43	3564.6	4021.58
HALLMARK_MYOGENESIS	3907	3772.43	3941.46	3872.53	3509.91	3442.18	3600.32	4524.08	5017.89	4569.39	4923.54	3343.99	3532.33	4652.62	4803.16
HALLMARK_UV_RESPONSE	2932.57	3601.47	3639.25	3614.28	3849.56	3067.62	2797.53	2035.36	2415.26	407.949	976.382	3892.01	3896.2	2540.44	2748.95
HALLMARK_BILE_ACID_METABOLISM	2930.95	2557.91	2449.11	2743.42	2440.44	3066.06	2795.85	3490.77	3378.19	5310.66	4005	2043.93	2381.24	3333.77	4181.56
HALLMARK_E2F_TARGETS	2769.91	2665.54	2636.35	2565.63	2198.15	3534.99	2859.38	4779.54	3694.16	2144.53	2680.43	4212.41	3819.68	3390.13	1790.72
HALLMARK_PANCREAS_BETA_CELLS	2571.14	2285.1	2940.84	1703.5	2438.62	2360.14	1860.99	2668.33	2621.64	1628.38	2520.64	3234.2	3103.91	3675.13	3637.66
HALLMARK_KRAS_SIGNALING_DN	396.181	369.108	209.256	423.254	-3.36505	-386.304	197.054	1779.38	1133.65	660.818	1434.02	-10.8812	-180.865	556.485	2001.69
HALLMARK_SPERMATOGENESIS	-143.193	419.236	204.62	-446.627	-384.217	-216.319	-260.507	801.034	134.626	1928.36	770.597	-70.0666	-655.562	-512.165	-724.075

## Sheet: BIOCARTA_SS_RNAseq
Name	Median score	S1842_00106_SS_MTM_Plug	S1842_00106_SS_MTM_Whole	S1842_00107_SS_MTM_Plug	S1842_00107_SS_MTM_Whole	S1842_00108_SS_MTM_Plug	S1842_00108_SS_MTM_Whole	S1842_00110_SS_MTM_Plug	S1842_00110_SS_MTM_Whole	S1842_00111_SS_MTM_Plug	S1842_00111_SS_MTM_Whole	S1842_00115_SS_MTM_Plug	S1842_00115_SS_MTM_Whole	S1842_00118_SS_MTM_Plug	S1842_00118_SS_MTM_Whole
BIOCARTA_MHC_PATHWAY	11170.8	11170.2	11088.8	11182.8	10918.9	11043.1	10981.4	11325.1	11276.2	10990.3	11340.4	11410.8	11399.3	11171.4	10981.7
BIOCARTA_IL3_PATHWAY	10538.4	10334.8	10532.9	10630.2	10615.3	10767.1	10770.6	10365.9	10509.4	10090.9	10123.3	10546.3	10604.8	10267.7	10544
BIOCARTA_IL10_PATHWAY	10507.4	10387.6	10357.2	10626.8	10604.6	9629.63	9270.96	10545.2	10807.5	9831.18	10479.7	10681	10535.1	10578.1	9717.2
BIOCARTA_CDMAC_PATHWAY	10473.2	10776.9	10813.2	10514.3	10705.2	10483.5	10462.3	10236.2	10462.8	10207.6	9679.77	10622.6	10284.7	9996.02	10634.2
BIOCARTA_NTHI_PATHWAY	10465	10636.7	10643.6	10692.4	10592.8	10479.8	10515	10364.2	10462.5	9863.85	10076.6	10467.5	10302.8	10094.3	10030.6
BIOCARTA_RELA_PATHWAY	10429.9	10652.9	10520.5	10622.9	10695.9	10345	10312.1	10367.9	10491.8	10148.4	10184.9	10624	10549.2	10174	10363.7
BIOCARTA_IL6_PATHWAY	10343	10335.3	10401.3	10457.7	10491.3	10350.8	10277.1	10131	10352.7	9739.59	9901.17	10412.8	10447.2	10084	10236.3
BIOCARTA_PCAF_PATHWAY	10305.8	10323.3	10236.7	10340.6	10333.8	10197.3	10288.3	10523.5	10553	9848.01	9858.99	10705.8	10719.7	10082.8	10102.6
BIOCARTA_TNFR2_PATHWAY	10297.5	10716	10699.4	10786.1	10817	10294.3	10256.6	10300.7	10336.6	10230.3	10059.6	10362.6	10170.7	10220.5	10068.1
BIOCARTA_UCALPAIN_PATHWAY	10055.4	10137.7	10073.8	9589.62	9606	9966.1	9822.78	10037	10597.6	9135.56	10725.2	10287.1	10128.9	10276.5	9532.45
BIOCARTA_ECM_PATHWAY	10044.5	10148.6	10216.2	9989.32	10058.8	10194.8	10185.2	9787.16	9900.61	9470.32	9399.41	10030.2	10113.3	10080.6	9849.37
BIOCARTA_NFKB_PATHWAY	10022.3	10405.3	10335	10344.3	10301.7	9952.47	9872.69	9963.52	10128.3	9906.25	9921.39	10021.9	9960.7	10022.7	10076.4
BIOCARTA_IL2_PATHWAY	10015.7	10144.6	10144.3	10288.6	10343.3	10225.5	10351.1	9961.68	10069.7	7952.56	8323.3	9865.93	9955.25	9720.47	9112.52
BIOCARTA_EPO_PATHWAY	9987.04	9875.54	10045.9	10227.1	10231.2	10419.5	10335.7	9848.38	10044.2	9528.61	9169.15	9929.85	10058.5	9648.55	9614.67
BIOCARTA_HIF_PATHWAY	9976.57	10218.7	10183.8	10300.3	10398.9	9793.41	9875.37	10446.8	10179.9	10004.6	9590.07	9605	9528.93	9849.58	9948.54
BIOCARTA_BLYMPHOCYTE_PATHWAY	9969.26	10121.1	9654.93	10162.2	10399	10669.9	10722.6	9464.72	9681.02	9118.46	9929.26	10009.3	10269.2	9783.73	9542.89
BIOCARTA_CCR5_PATHWAY	9963.4	9944.84	9764.39	10015.4	9981.96	10287.5	10095.4	9881.44	10079.9	9828.03	9759.57	10170.7	10283.1	9836.65	9658.88
BIOCARTA_TPO_PATHWAY	9939.55	10302.1	10253.6	10326.4	10304.9	10377.8	10331.9	9790.03	9968.29	9655.24	9174.06	9909.59	9910.82	9617.66	9808.33
BIOCARTA_FMLP_PATHWAY	9929.43	10010.9	9980.59	10218.3	10219.8	10093.3	10013.2	9755.26	9884.88	9576.32	9275.11	9973.99	9769.59	9598.85	9660.39
BIOCARTA_EIF_PATHWAY	9891	10104.3	10095.2	9918.67	9954.3	9612.07	9230.28	9903.37	9826.16	9878.62	10106.1	9683.58	9738.98	10157.1	9725.87
BIOCARTA_TCRA_PATHWAY	9849.46	9918.41	9780.5	9996.97	9972.06	9300.01	9103.04	10543.9	10486.5	3285.35	4512.62	10269.4	10212.6	9744.05	5344.95
BIOCARTA_STRESS_PATHWAY	9793.9	10034.7	9998.65	10170.7	10185.3	9757.94	9822.05	9642.42	9777.49	9541.38	9460.69	9876	9810.31	9306.02	9124.76
BIOCARTA_CTL_PATHWAY	9775.5	9593.35	9688.62	9887.22	9762.24	10100	9788.77	10716.3	10699.6	3091.73	5344.74	10700.5	10678.2	8355.67	5792.02
BIOCARTA_ARAP_PATHWAY	9769.15	9983.76	9739.98	9789.69	9764.78	9773.53	9592.29	9969.59	9928.03	9706.73	9483.72	9706.73	9347.46	9849.64	10067.8
BIOCARTA_SODD_PATHWAY	9729.95	9718.36	9176.84	9811.92	9566.18	9420.43	9693.16	10030.5	9741.53	10061.9	10022.8	10196.1	10093	9561.93	9569.17
BIOCARTA_RAS_PATHWAY	9711.5	9971.26	10019.4	10125	10091.4	9740.96	9729.54	9507.5	9635.24	9366.45	9078.92	9804.41	9693.46	9545.67	9623.93
BIOCARTA_BIOPEPTIDES_PATHWAY	9688.51	9387.31	9630.42	9783.95	9746.59	10062.7	9887.7	9759.83	9923.18	9594.59	8641.37	9612.11	9768.49	9552.61	9313.78
BIOCARTA_INTEGRIN_PATHWAY	9667.63	9584.98	9661.1	9692.79	9548.45	9957.19	10049.5	9613.92	10023	9112.86	9341.59	9653.32	9861.31	9674.15	9894
BIOCARTA_IL1R_PATHWAY	9664.91	9719.13	9610.68	9928.52	9980.49	9159.17	9149.19	9734.04	9750.66	8640.23	9204.81	9944.55	10026.3	9255.55	9312.43
BIOCARTA_PYK2_PATHWAY	9662.26	9595.66	9714.61	9849.41	9664.43	9899.97	9908.18	9530.97	9705.43	9660.09	9075.66	9296.49	9506.18	9504.9	9786.15
BIOCARTA_GLEEVEC_PATHWAY	9655.63	9648.9	9730.78	9853.11	9831.84	9868.01	9990.26	9539.52	9662.36	9156.49	9044.82	9637.01	9647.45	9053.55	9750.51
BIOCARTA_MAL_PATHWAY	9649.46	9811.18	9706.17	9805.03	9554.04	10134.3	10149.1	9716.88	9592.74	9212.29	9126.84	9582.03	9353.06	9555.19	10137.4
BIOCARTA_IL4_PATHWAY	9623.79	9340.2	9236.59	9749.55	9560.66	9953.23	10098.3	9769.26	9594.27	9462.6	9708.16	9557.14	9653.31	9303.06	9670.48
BIOCARTA_IL7_PATHWAY	9603.8	9863.7	9612.99	9631.76	9771.83	9826.43	9756.62	9854.05	9560.92	8532.53	8030.73	9525.45	9594.61	9018.06	8248.33
BIOCARTA_RNA_PATHWAY	9602.93	10347.2	10070.7	10320.6	10288.1	9593.84	9195.48	9462.8	9403.02	9547.85	9612.02	9871.74	9657.27	9297.49	9061.72
BIOCARTA_TID_PATHWAY	9536.87	9871.72	9552.91	10050.6	9958.34	9720.51	9455.57	9473.59	9548.4	9383.51	9356.8	9686.53	9525.34	8945.04	9240.91
BIOCARTA_THELPER_PATHWAY	9491.05	9124.92	8801.29	9811.26	9565.68	9883.52	9416.41	10235.8	10209.5	1861.43	3450.4	9658.15	9592.79	8565.61	5398.37
BIOCARTA_TCR_PATHWAY	9479.22	9592.27	9579.19	9709.54	9613.35	9631.8	9491.5	9466.94	9515.46	6487.62	6398.28	9460.92	9415.02	9017.6	7933.64
BIOCARTA_RANKL_PATHWAY	9474.53	9294.7	9041.36	9654.37	9750.67	9141.63	9188.97	9786.94	9855.62	9240.27	9867.89	10222.2	10015.9	8560.57	9264.97
BIOCARTA_CERAMIDE_PATHWAY	9447.65	9581.98	9494.75	9396.52	9496.34	9429.98	9465.31	9334.97	9232.54	9047.56	8880.3	9503.39	9545.57	9262.82	9846.38
BIOCARTA_CD40_PATHWAY	9427.17	9732.35	9640.94	10205.9	10038.2	9968.52	9733.69	9339.76	9456.02	8677.92	8932.12	9398.31	9200.78	9134.7	9249.92
BIOCARTA_MTA3_PATHWAY	9397.23	9290.07	9027.87	9205.65	9394.94	9321.92	9385.02	10203.8	9816.69	10180.2	10195	9489.98	8928.22	9399.52	10381.7
BIOCARTA_GRANULOCYTES_PATHWAY	9375.39	9960.69	9928.97	10166.9	10036.1	9140.16	9157.95	9267.46	9757.81	8386.16	9483.32	9620.98	9187.65	9246.66	8767.11
BIOCARTA_HCMV_PATHWAY	9366.7	9571.69	9473.51	9839.96	9679.3	9763.2	9757.77	8873.48	9186.45	8672.42	8519.31	9374.82	9345.03	8853.24	9358.57
BIOCARTA_CALCINEURIN_PATHWAY	9356.37	9573.88	9329.07	9656.37	9486.05	9873.4	9491.81	9138.8	9350.4	9279.27	8778.93	9481.37	9358.5	9314.96	9354.25
BIOCARTA_D4GDI_PATHWAY	9352.59	9377.66	9243.42	9292.45	9427.49	9359.98	9345.2	9931.39	9694.5	7822.04	9020.47	10046.6	10050.1	9093.2	7224.72
BIOCARTA_TCYTOTOXIC_PATHWAY	9351.37	9068.18	8763.52	9724.63	9496.82	9829.46	9205.92	10074.1	9969.58	17.9043	2398.68	9723.77	9546.13	8320.31	4192.74
BIOCARTA_BCR_PATHWAY	9317.71	9672.38	9717.21	9843.57	9662.08	9854.07	9787.14	9068.21	9262.39	8527.41	8236.23	9288.83	9291.09	9344.32	8864.37
BIOCARTA_MET_PATHWAY	9295.67	9447.29	9352.3	9514.79	9521.19	9640.33	9663.98	9239.04	9383.59	8659.65	8300.73	9078.67	8888.33	9128.99	9009.2
BIOCARTA_AKT_PATHWAY	9290.28	9401.02	9455.72	9366.77	9398.82	9260.91	9101.75	9114.16	9319.64	8298.05	8003.92	9473.68	9350.13	8560.66	8642.33
BIOCARTA_KERATINOCYTE_PATHWAY	9286.44	9312.88	9287.26	9482.88	9353.45	9419.17	9375.72	9285.63	9247.98	8218.93	8061.63	9288.18	9273.15	8473.05	8904.35
BIOCARTA_MYOSIN_PATHWAY	9282.67	9655.8	9690.4	8792.7	8956.71	9475.09	9327.03	8858.86	9391.97	8694.05	7568.24	9379.2	9147.25	9238.32	9508.09
BIOCARTA_AT1R_PATHWAY	9271.38	9151.72	9132.81	9339.66	9340.71	9525.06	9541.87	9247.74	9135.11	9502.84	8997.72	9101.94	9097.75	9295.02	9592.52
BIOCARTA_HIVNEF_PATHWAY	9264.38	9367.98	9272.24	9370.75	9246.12	9256.53	9214.35	9408.01	9426.9	8647.31	8780.75	9699.22	9437.65	9202	9064.4
BIOCARTA_CCR3_PATHWAY	9252.51	9570.68	9383.74	9456.55	9515.17	9842.5	9810.05	8326.46	8908.45	8513.16	7701.75	8558.45	8157.39	9121.28	9672.81
BIOCARTA_PAR1_PATHWAY	9244.03	9650.2	9562.13	9169.97	9112.84	9709.32	9567.39	8926.01	9334.21	8052.21	7005.53	9517.18	9112.44	9110.89	9318.1
BIOCARTA_BARRESTIN_SRC_PATHWAY	9214.14	9243.47	9345.56	9270.51	9089.35	9619.26	9417.25	9184.81	9512.56	8690.88	8281.81	8909.94	8738.65	8735.68	9300.5
BIOCARTA_PML_PATHWAY	9163.88	9062.68	9030.52	9307.53	9391.16	9509.4	9265.08	8919.35	9308.58	7467.38	7859.03	9906.25	9745.92	7950.42	8516.88
BIOCARTA_PDGF_PATHWAY	9153.69	9626.87	9459.68	9452.16	9561.56	9357.47	9328.39	8768.04	8986.86	9007.55	8641.74	9134.9	9172.48	9033.77	8755.44
BIOCARTA_41BB_PATHWAY	9142.56	9811.43	9698.52	9745.06	9685.4	9123.05	8818.44	9005.78	9397.09	7407.85	8467.44	9457.14	9162.07	8484.98	7896.45
BIOCARTA_TNFR1_PATHWAY	9132.36	9083.82	8819.61	8970.87	8996.98	8960.98	9225.54	9180.89	9362.9	8503.01	8666.03	9263.38	9255.25	9339.8	9282.45
BIOCARTA_GCR_PATHWAY	9123.97	8783.37	8639.22	9348.83	9323.07	9473.03	9273.21	9085.08	8798.77	8821.08	8518.65	9162.86	9017.45	9443.64	9582.38
BIOCARTA_IL2RB_PATHWAY	9119.23	9022.08	8956.6	9134.68	9103.78	9508.42	9531.81	9550.76	9448.76	7445.69	8164.45	9513.36	9474.87	8370.22	8624.63
BIOCARTA_DREAM_PATHWAY	9115.19	9048.19	9332.5	9266.17	9182.19	8868.84	9002.74	9263.39	8857.74	8131.23	8696.97	10013	9763.99	9832.64	8634.16
BIOCARTA_MTOR_PATHWAY	9099.8	9238.73	9304.24	9101.5	9035.81	9063.01	8883.89	8982.15	9247.52	9098.11	9031.57	9095.64	9208.39	9420.56	9337.21
BIOCARTA_RACCYCD_PATHWAY	9067.16	9186.6	8960.53	9351.11	9081.09	9305.39	8974.1	9220.52	9329.9	8314.91	8196.27	9258.47	8942.06	8878.84	9053.23
BIOCARTA_CSK_PATHWAY	9052.67	8899.66	8992.9	9172.34	9112.44	8588.71	8550.68	9701.25	9474.63	3979.16	5244.83	9982.57	9837.64	9482.91	6115.84
BIOCARTA_ETS_PATHWAY	9028.75	8980.52	9252.95	9076.98	8832.63	8869.42	8810.81	9242.2	9632.12	8648.65	8735.9	9391.69	9588.29	9217.85	8559.88
BIOCARTA_FCER1_PATHWAY	9019.33	9460.28	9127.65	9775.84	9617.31	9447.95	9344.37	8511.84	8534.85	8517.81	8238.69	8882.88	8752.31	9337.77	8911.02
BIOCARTA_MAPK_PATHWAY	9018.25	9020.53	9015.97	9168.47	9174.45	9146.43	9222.46	9186.98	9125.47	8414.1	8055.32	8939.69	8916.95	8532.18	8861.44
BIOCARTA_GH_PATHWAY	9012.63	9079.84	8944	9076.16	8994.09	9364.42	9484.67	9025.43	9011.34	9013.92	8516.65	8912.12	9077.13	8363.99	8731.84
BIOCARTA_MEF2D_PATHWAY	8994.13	8866.68	8592.5	8969.59	8902.19	9432.49	9119.43	8619.35	9168.51	8670.56	9018.67	9234	9223.51	8824.27	9479.21
BIOCARTA_LYM_PATHWAY	8989.98	9829.62	9540.4	9698.57	9556	9452.55	9406.1	8472.63	8797.97	8809.04	8151.54	8471.1	8236.13	9170.93	7961.19
BIOCARTA_TOLL_PATHWAY	8986.67	9083.58	8980.78	9314.71	9185.21	9269.89	8992.56	9166.16	8878.39	9111.91	8401.88	8939.74	8571.34	8116.13	8644.32
BIOCARTA_EIF4_PATHWAY	8985.16	9035.32	8853.75	8996.66	8831.46	9208.03	9205.85	8734.97	8851.19	9266.69	9014.91	8568.7	8596.04	8973.66	9316.75
BIOCARTA_CXCR4_PATHWAY	8984.37	9189.98	9260.69	9452.07	9175.7	9234.38	9035.3	8343.59	8754.16	8891.44	8244.66	8463.45	8933.45	8731.34	9134.43
BIOCARTA_NGF_PATHWAY	8959.01	8949.92	8968.1	9254.99	9103.89	9161.72	8937.49	8723.23	9187.97	7885.52	7822.87	9207.6	9380.99	8660.63	8634.86
BIOCARTA_PTDINS_PATHWAY	8956.14	8961.83	8818.28	9042	9028.52	8950.45	8557.79	8940.65	9178.33	8517.83	8722.09	9136.65	9136.77	8938.26	9053.41
BIOCARTA_EGF_PATHWAY	8956	8978.6	8943.4	9128.02	9073.23	9090.62	9016.23	8632.91	8610.26	8968.6	8519.96	8609.51	8664.57	8638.54	9322.17
BIOCARTA_P38MAPK_PATHWAY	8940.79	8989.25	8615.45	8923.84	8957.75	8855.68	8845.99	9145.36	9003.49	8820.11	8475.59	9068.1	9022.93	8444.39	8969.21
BIOCARTA_HSP27_PATHWAY	8931.69	8963.43	8930.7	9013.8	8932.68	8293.97	7888.7	9293.26	9675.4	6515.95	7820.46	9518.12	9330.25	7959.6	8387.71
BIOCARTA_VIP_PATHWAY	8905.93	8957.06	8971.62	9177.76	9138.07	8874.41	8684.15	8903.46	8835.11	8247.15	8633.45	9747.46	9502.04	8908.4	8530.85
BIOCARTA_GPCR_PATHWAY	8863.1	8806.35	8886.1	9090.51	9003.58	9000.54	8840.11	8639.29	8577.87	8173.56	8091.22	9239.13	9072.92	9052.56	8492.36
BIOCARTA_ARENRF2_PATHWAY	8829.41	8709.33	8877.82	9022.28	8479.93	8323.67	9114.76	9423.77	9666.61	9068.19	8781	8496.85	8388.34	9355.96	8227.01
BIOCARTA_CARM1_PATHWAY	8771.94	8561.24	8910.13	8955.78	8900.26	8703.46	8840.42	8318.73	8216.36	7507.18	7927.92	9344.72	9173.06	9324.84	7966.16
BIOCARTA_IGF1_PATHWAY	8770.48	8996.11	8907.19	9079.72	8973.36	9144.08	9308.41	8758.78	8661.68	8647.62	8767.8	8718.83	8732.15	8773.15	8738.1
BIOCARTA_HSWI_SNF_PATHWAY	8766.48	8752.47	8662.31	8934.76	8741.11	9259.83	9392.11	8780.48	8789.06	7867.89	7672.29	8611.21	8826.15	8167.25	9050.97
BIOCARTA_INSULIN_PATHWAY	8708.62	8947.25	8837.23	8793.78	8691.27	8713.36	9012.26	8778.9	8686.9	8494.78	8618.87	8568.5	8780.65	8703.87	8611.45
BIOCARTA_CASPASE_PATHWAY	8588.98	8437.01	8199.99	8381.49	8186.32	8885.73	8898.74	9268.44	8740.95	7449.38	8321.27	9460.74	9135.12	8993.16	7047.07
BIOCARTA_RAB_PATHWAY	8588.86	9281.8	8633.62	8476.16	8622.07	9572.49	9015.11	8608.92	7657.19	8350.23	6816.99	8461.02	7518.72	8568.81	9153.18
BIOCARTA_BCELLSURVIVAL_PATHWAY	8576.24	8331.97	8340.03	8505.05	8069.73	8807.25	8950.1	8647.44	8677.6	8131.67	8356.7	8983.59	8968.7	9008.25	7933.71
BIOCARTA_CHEMICAL_PATHWAY	8544.74	8495.15	8480.13	8613.33	8165.26	8993.79	8646.65	8594.07	8438.42	8495.41	8458.29	8824.7	8415.14	8678.72	8618.46
BIOCARTA_NKCELLS_PATHWAY	8485.58	8868.37	8510.15	8461.01	8190.25	9526.92	9495.73	9571.19	8330.71	5614.66	6973.91	9953.73	9740.97	8165.1	7146.01
BIOCARTA_RANBP2_PATHWAY	8484.5	8711.21	7956.72	8536.83	9022.22	8165.12	8865.6	8244.15	8465.44	8523.69	7894.22	8524.62	8503.55	8194.56	7099.2
BIOCARTA_SPPA_PATHWAY	8463.86	8707.36	8457.82	8486.66	8469.9	9213.8	8951.32	6809.7	8005.36	6145.53	5976.91	7981.38	7523.21	8694.35	8623.42
BIOCARTA_P53HYPOXIA_PATHWAY	8452.52	8499.69	8249.12	8736.31	8107.26	7825.74	7678.08	9691.74	9227.31	8806.35	8734.53	8405.35	7822.14	8398.43	8734.78
BIOCARTA_RHO_PATHWAY	8447.78	7879.14	7926.63	8455.79	8257.77	8725.11	8727.85	8439.77	8336.49	8909.36	8919.92	7899.25	8115.95	9066.44	9348.93
BIOCARTA_BARR_MAPK_PATHWAY	8425.01	8476.7	8454.15	8395.88	8063.17	8812.32	8543.86	8623.3	8991.29	7885.33	7292.33	8114.05	7890.08	7934.4	8705.27
BIOCARTA_FAS_PATHWAY	8424.81	8148.57	8149.31	8258.46	7950.26	8843.99	8688.58	9096.27	8843.14	7797.53	8112.62	8864.07	8594.44	8572.49	8277.13
BIOCARTA_SET_PATHWAY	8393.08	8502.96	7886.83	8283.21	7665.2	8577.43	8937.88	9557.08	9840.44	4295.18	6214.8	9542.83	9764.3	6897.6	5208.3
BIOCARTA_CREB_PATHWAY	8340.71	8062.4	8231.02	8621.37	8495.46	8742.87	8631.82	8025.22	8028.31	7767.71	7374.84	8522.3	8301.22	8501.74	8380.19
BIOCARTA_EIF2_PATHWAY	8313.4	8766.12	8645.46	8515.45	8742.86	7350.09	7125.68	8041.06	7753.74	8522.78	8597.13	8377.23	8122.16	8249.57	7476.25
BIOCARTA_ERK_PATHWAY	8297.09	8225.92	8100.18	8517.84	8560.49	8642.76	8644.65	8075.19	8285.25	8651.11	8308.94	8228.13	8234.89	8133.84	8893.28
BIOCARTA_VDR_PATHWAY	8296.69	8145.99	8131.01	8590.62	8503.55	8844.62	8847.31	8087	8393.64	6976.46	6836	8181.53	8258.45	8334.93	8799.22
BIOCARTA_HDAC_PATHWAY	8289.44	8304.27	8213.76	8432.48	8274.62	8417.16	8664.36	8201.65	8466.02	8085.99	8054.7	8335.63	8424.27	8177.78	7847.67
BIOCARTA_DEATH_PATHWAY	8285.82	8040.72	7863.13	8231	8018.31	8282.24	8289.4	8619.43	8393.31	7868.05	8889.14	9111.33	8923.32	8501.48	8094.81
BIOCARTA_TH1TH2_PATHWAY	8221.69	8089.73	7766.3	8453.01	8189.69	8982.2	8253.68	8811.21	8355.32	5182.56	7591.04	9302.2	9174.88	7531.43	6096.43
BIOCARTA_NPC_PATHWAY	8204.65	8322.75	7481.56	8207.89	8265.57	8222.92	8271.98	7947.18	7355.3	7547.41	6970.3	8305.62	8201.42	8236.23	5850.37
BIOCARTA_LAIR_PATHWAY	8190.31	8504.94	8374.63	8823.16	8682.73	7478.9	7106.76	8535.03	8691.78	7724.38	8006.37	8213.19	7699.2	8167.42	7550.1
BIOCARTA_NKT_PATHWAY	8178.42	8544.62	8198.88	8818.12	8677.7	8570	8157.97	8206.91	8542.23	3841.66	4954.03	7978.56	7856.77	7489.65	6073.25
BIOCARTA_NDKDYNAMIN_PATHWAY	8168.78	7970.48	7890.62	8973.51	7928.75	8420.99	8932.71	7978.1	7962.36	7262.22	8025.59	8348.15	8311.97	8608.96	8946.59
BIOCARTA_GSK3_PATHWAY	8146.45	8357.31	8669.31	8273.43	8183.89	7337.71	6986.93	8109.01	8189.61	7240.6	7223.16	8613.5	8073.78	8251.67	7390.03
BIOCARTA_PPARA_PATHWAY	8129.09	8325.91	8256.51	8489.95	8429.64	7896.4	8124.03	7758.22	7969.76	8061.77	8403.28	7886.17	8083.88	8522.67	8134.14
BIOCARTA_IL12_PATHWAY	8105.73	8139.52	8036.48	8071.94	7903.89	8622.9	8618.16	8850.56	9201.3	1248.51	2854.37	9274.73	8968.16	6244.86	3262.51
BIOCARTA_CARDIACEGF_PATHWAY	8101.84	8302.15	8509.99	8172	8576.33	8191.44	8155	7693.92	7902.82	8048.67	7297.13	7625.71	7429.7	7695.96	8513.67
BIOCARTA_NFAT_PATHWAY	8019.85	8002.33	8172.31	8345.68	8278.01	8017.43	7911.57	7964.17	8022.27	6869.5	7295.02	8391.11	8239.7	8164.43	7500.96
BIOCARTA_IGF1MTOR_PATHWAY	7991.63	8000.58	8022.65	8042.12	7912.53	8268.28	8165.66	7670.12	7885.43	7982.68	7908.92	7716.14	7672.44	8104.42	8425.58
BIOCARTA_IGF1R_PATHWAY	7986.7	7581.53	7794.1	8019.79	7868.32	8131.65	8362.55	7982.85	7763.91	7661.44	7990.56	8315.98	8211.44	8512.31	7933.13
BIOCARTA_ERAD_PATHWAY	7971.81	7728.3	7826.11	8284.1	7930.7	7862.88	7949.12	8290.74	8866.67	6567.32	7286.65	9001.39	8986.93	8814.13	7994.5
BIOCARTA_CTLA4_PATHWAY	7919.22	7688.62	7375.96	8421.12	8149.82	7103.76	6625.99	8694.7	8490.37	491.879	3421.58	8705.01	8604.51	8403.33	2480.15
BIOCARTA_ASBCELL_PATHWAY	7881.88	7499.71	7199.25	8653.03	8075.51	8244.53	7178.75	9347.83	9436.96	4664.72	7009.99	9577.56	9485.03	7688.25	5171.42
BIOCARTA_PS1_PATHWAY	7844.77	8441.55	8696.21	7953.37	8018.46	7602.51	7650.58	7484.71	7901.8	6651.96	7370.36	8383.88	7787.74	8366.55	7330.07
BIOCARTA_LONGEVITY_PATHWAY	7844.72	7507.26	7853.41	8278.3	8175.28	8219.24	8250.38	7527.75	7209.52	7362.47	7836.02	7563.87	7378.59	8252.06	8950.47
BIOCARTA_VEGF_PATHWAY	7827.51	8036.16	7996.3	8333.22	8018.79	8241.55	7908.12	7881.94	7773.07	7559.42	7350.91	7649.61	7140.04	7710.03	6855.81
BIOCARTA_ACH_PATHWAY	7818.13	7737.29	7947.3	7317.41	7120.51	8023.25	8183.87	7898.97	8587.26	4776.44	5615.52	8876.07	8779.3	6507.81	4901.68
BIOCARTA_EDG1_PATHWAY	7801.23	8673.43	8529.96	7875.29	8158.97	7813.76	7788.7	7342.21	7772.51	6591.54	7114.61	8009.47	7532.23	8447.16	6516.26
BIOCARTA_INFLAM_PATHWAY	7761.3	7707.99	7627.05	7814.61	7926.51	4830.97	4589.7	8161.44	7950.79	5966.54	7823.66	8709.26	8625.3	7303.65	5494.52
BIOCARTA_CDK5_PATHWAY	7756.08	7356.53	7334.42	8467.89	7808.73	7924.45	7703.43	7638.33	8401.96	7026.01	5956.31	7901.66	8267.68	6880.71	8017.16
BIOCARTA_ERK5_PATHWAY	7736.2	7911.25	7561.14	8202.25	8205.9	8547.47	8281.33	6963.38	8251.99	6612.54	6246.41	7387.69	7350.99	7138.16	7929.88
BIOCARTA_ATM_PATHWAY	7714.09	8206.04	7543.64	7676.46	7904.79	7175.6	7132.2	8301.14	8297.83	7492.72	8463.7	8434.47	7667.65	7751.72	6736.61
BIOCARTA_AMAN_PATHWAY	7695.98	6828.07	6358.86	7995.79	7163.21	8433.03	8411.73	7983.93	8734.85	5634.95	5480.57	7593.76	7732.82	7659.13	7782.96
BIOCARTA_IL17_PATHWAY	7679.22	7787.34	7909.3	8394.25	8207.81	5524.61	5420.6	9366.07	8488.68	1127.86	2392.72	8290.9	7571.11	7399.01	2194.04
BIOCARTA_AKAP13_PATHWAY	7667.84	8340.23	8227.99	7234.43	7184.89	7577.54	8115.59	7546.01	7313.58	8774.77	8676.19	7758.13	7410.72	8775.77	6137.65
BIOCARTA_TGFB_PATHWAY	7661.93	7677.62	7646.24	7709.37	7588.71	7601.01	7815.71	8003.33	8411.7	7347.36	7205.16	7213.09	7584.77	7731.93	8548.59
BIOCARTA_TEL_PATHWAY	7656.4	8068.54	7545.44	7994.36	8017.2	7813.22	7628.74	7363.52	7292.84	8161.76	7684.07	7592.49	7454.29	7272.12	7962.34
BIOCARTA_SM_PATHWAY	7653.68	7329.48	7647.86	7451.07	7545.35	7865.49	6863.54	6923.71	6855.73	7700.21	8057.16	7659.5	7849.03	7795.57	8036.1
BIOCARTA_CARM_ER_PATHWAY	7647.25	7638.97	7584.83	7772.53	7629.35	8157.74	7909.36	7496.48	7832.83	7701.31	7655.52	7466.31	7411.15	7664.38	7523.69
BIOCARTA_PTEN_PATHWAY	7527.89	6899.57	7192.01	7140.04	6751.49	7796.36	7635.86	8393.57	8343.64	7544.66	7273.46	7294.31	7643.91	7511.11	8161.26
BIOCARTA_BAD_PATHWAY	7464.81	7378.3	7213.68	7422.28	7346.76	7523.56	7768.39	7961.13	7503.55	6687.6	7185.35	7611.87	7426.06	8138.62	7561.78
BIOCARTA_HER2_PATHWAY	7457.16	7392.72	7381.15	7674.36	7327.21	7345.25	7177.4	8198.05	8029.67	8594.79	8245.87	7071.01	7066.33	7521.6	8125.4
BIOCARTA_TALL1_PATHWAY	7338.85	7450.61	7189.03	7709.56	7649.19	8493.36	8449.95	5848.13	7830.1	5575.65	5614.8	7075.22	7227.09	7079.41	7583.12
BIOCARTA_TRKA_PATHWAY	7201.2	7409.92	6993.43	7517.6	7356.82	7716.7	7276.25	6262.02	8043.48	5677.61	5679.52	6897.61	6963.08	7126.15	7564.06
BIOCARTA_GATA3_PATHWAY	7188.35	6796.48	6969.44	7517.28	7083.66	7293.05	6964.35	7452.44	7415.23	4930.08	6049.6	8604.72	8270.19	7900.64	6111.91
BIOCARTA_WNT_PATHWAY	7054.09	6994.16	7487.42	6378.8	5925.67	6719.67	6345.47	7021.72	7478.41	5797.41	7089.21	7667.04	7359.43	7644.7	7086.46
BIOCARTA_AKAPCENTROSOME_PATHWAY	7004.48	6971.63	6479.74	7037.32	7241.03	6893.2	6896.8	7205.77	6286.45	8664.87	8540.24	8496.96	7924.43	6900.26	5956.18
BIOCARTA_CYTOKINE_PATHWAY	7000.36	7124.99	6875.74	8004.39	7872.64	4191.06	3457.23	8173.56	7723.18	3874.75	6795.09	9932.97	9244.41	6327.06	5267.53
BIOCARTA_PGC1A_PATHWAY	6990.78	6892.04	7003.35	6978.21	6910.66	7088.46	6714.83	7318.8	7322.75	6940.07	6487.7	7193.96	7165.98	7267.85	6126.39
BIOCARTA_NOS1_PATHWAY	6953.54	6390.8	6610.41	6834.07	6965.67	7315.07	7278.15	6819.92	6941.41	5890.29	6736.57	8169.27	7966.03	8017.03	7249.41
BIOCARTA_PRC2_PATHWAY	6936.3	6902.07	6970.54	7425.02	6795.26	7619.03	6860.74	7623.75	7746.79	6042.36	6220.81	7167.11	7502.03	6304.98	6147.96
BIOCARTA_TFF_PATHWAY	6749.21	6503.09	6474.35	6353.23	5964.29	7192.38	6973.24	8356.51	7366.73	6525.18	7093.54	6065.18	6134.14	7244.76	8456.26
BIOCARTA_CTCF_PATHWAY	6658.43	7071.58	6172.64	5973.4	6468.02	7290.06	6985.43	7460.32	7163.66	6166.2	5442.37	7327.51	6848.85	6271.76	5458.29
BIOCARTA_MITOCHONDRIA_PATHWAY	6620.35	6554.99	6063.15	6201.54	5255.21	6607.56	6499.75	7791.03	6920.21	7238.8	7301.35	7478.63	7193.65	6228.1	6633.14
BIOCARTA_NO1_PATHWAY	6595.69	6082.71	6385.55	6835.33	6581.44	5922.9	6018.05	7065.6	6370.11	6364.49	6691.87	6824.81	6609.93	7287.28	7290.79
BIOCARTA_AGPCR_PATHWAY	6526.84	6505.88	6928.07	5979.49	6292.04	6518.59	6535.1	6429.41	6883.76	5260.55	6558.08	7693.3	7827.62	7825.11	6003.25
BIOCARTA_RAC1_PATHWAY	6504.95	7471.63	7008.45	7021.98	7324.81	7187.33	7658.47	5920.01	6527.96	6481.94	5419.37	5933.03	6100.37	5942.52	6199.43
BIOCARTA_PITX2_PATHWAY	6443.17	6434.39	6718.56	6217.74	6451.94	6045.95	6033.18	6587.29	6750.05	4752.96	4794.14	6472.67	5943.05	6868.64	6622.76
BIOCARTA_MCALPAIN_PATHWAY	6377.85	5286.81	5695.07	5704.79	5711.95	6188.14	6076.74	6775.68	6567.57	5565.01	6773.06	7310.1	7190.96	7246.11	6601.58
BIOCARTA_EGFR_SMRTE_PATHWAY	6292.02	6037.44	6483.33	6631.99	6155.07	6590.41	6254.09	5685.72	5867.45	7900.34	6329.96	5242.9	5834.92	7123.68	8357.23
BIOCARTA_G2_PATHWAY	6073.44	6057.08	5537.07	5713.14	6089.8	6572.7	6798.32	7052.74	6152.22	5753.9	5763.05	6772.4	6191.42	5049.99	4519.83
BIOCARTA_P53_PATHWAY	5985.09	5992.22	5744.84	6085	5558.62	5509.22	5552.44	6802.81	6823.71	4232.08	4974.52	6825.95	5977.96	6991.85	7011.47
BIOCARTA_P27_PATHWAY	5911.63	5771.04	4434.68	5893.65	5319.08	6360.8	5733.49	7314.13	6091.45	5400.88	6060.91	6663.82	5929.61	6161.06	5420.48
BIOCARTA_NO2IL12_PATHWAY	5872.26	5847.01	5636.9	6310	5897.51	6236.85	5835.99	9078.73	8296.73	-1712.89	636.711	8566.68	8302.13	4645.76	568.016
BIOCARTA_STATHMIN_PATHWAY	5838.8	5830.83	6279.22	5846.77	6400.35	6121.63	5634.75	7245.92	5629.03	957.902	847.776	7150.45	6584.01	5304.2	2518.08
BIOCARTA_SPRY_PATHWAY	5807.3	5495.6	5956.41	5658.19	5400.09	6198.42	6140.37	5332.28	5156.82	7304.92	6565.83	4918.92	4797.12	5975.68	8167.47
BIOCARTA_TOB1_PATHWAY	5760.84	5804.4	4955.9	6261.2	5717.29	6159.05	5166.2	8452.89	8447.24	820.031	1949.28	7296.14	7340.67	4363.6	2205.95
BIOCARTA_AKAP95_PATHWAY	5733.4	6075.44	5785.98	4840.93	6280.21	5680.82	5277.46	5365.7	3484.47	7666.08	6020.77	6898.58	6204.95	5121.39	4833.76
BIOCARTA_CBL_PATHWAY	5645.35	5676.07	5314.38	5614.64	5581.76	5950.72	5737.32	4462.47	4631.05	7404.93	6360.64	4444.97	4486.53	5918.94	6673.18
BIOCARTA_EICOSANOID_PATHWAY	5642.08	6168.7	6166.11	6873.86	6693.53	5012.04	5244.15	5648.43	5069.97	5635.73	5472.04	4507.43	4507.45	6675.46	6043.25
BIOCARTA_ARF_PATHWAY	5555.69	5832.68	5280.5	4883.45	5543.85	4842.57	4186.05	5724.41	6236.5	5710.13	4440.63	5696.3	5692.99	5567.52	3787.11
BIOCARTA_AGR_PATHWAY	5464.76	5414.95	4753.22	5127.58	5186.71	5411.44	5270.06	5794.7	5109.59	6287.32	6448.75	5709.88	5542.81	5514.57	6377.17
BIOCARTA_DNAFRAGMENT_PATHWAY	5456.1	4974.93	4720.24	5415.84	4350.24	6373.67	6569.09	7636.99	7610.24	3798.18	5496.35	7863.77	8116.47	5013.28	2915.03
BIOCARTA_CELLCYCLE_PATHWAY	5309.13	5162.5	5249.04	4716.87	4385.8	5677	5369.23	6754.76	5588.96	5422.25	3788.96	6658.84	6123.39	4732.04	4898.43
BIOCARTA_DC_PATHWAY	5190.49	4931.56	5616.33	5941.28	5579.82	4700.17	4166.75	6307.22	5449.43	-990.917	2514.42	8749.32	8308.61	3284.81	1793.9
BIOCARTA_CPSF_PATHWAY	4977.66	3553.3	3789.67	4462.52	4223.35	5715.28	5469.18	6298.2	6631.52	4128.06	5747.39	6729.95	4486.15	6006.98	3285.75
BIOCARTA_SRCRPTP_PATHWAY	4878.71	4362.86	4383.08	4715.45	5121.97	6889.73	6785	5804.41	4283.85	5041.97	4406.83	5863.71	5443.74	2528.85	4049.9
BIOCARTA_COMP_PATHWAY	4753.31	2936.02	4107.86	5224.36	4282.27	3809.46	3202.63	8764.85	8838.84	4171.19	5792.04	6361.34	6130.65	5643.99	3774.07
BIOCARTA_HES_PATHWAY	4726.06	4835.49	5320.16	4665.6	5437.86	3931.22	4436.99	3617.48	4292.58	5005.46	4786.51	4815.66	4141.83	4575.44	4922.89
BIOCARTA_MPR_PATHWAY	4532.76	3909.65	3763.37	4559.52	4869.91	5899.06	5789.43	4062.76	3154.53	4959.71	5730.2	3971.35	3940.66	4506.01	4728.58
BIOCARTA_CHREBP_PATHWAY	4494.47	3987.88	4040.24	3879.23	4511.57	4536.98	4477.36	4361.69	4060.07	4447.65	5457.35	5733.76	5196.84	5758.81	4655.39
BIOCARTA_SKP2E2F_PATHWAY	4478.51	5066.06	4389.74	4537.63	3904.05	4089.87	4095.67	6258.58	5996.55	3880.39	4419.4	6501.65	5883.46	5290.62	3639.28
BIOCARTA_G1_PATHWAY	4423.55	4369.18	3998.81	4241.98	3810.94	4777.11	4411.49	6519.25	6158.02	4806.06	4363.59	6072.66	5948.59	4435.61	4299.64
BIOCARTA_LIS1_PATHWAY	4348.77	3418.2	3534.69	4267.96	3347.94	5379.2	5095.14	7081.93	6574.57	8434.28	7069.37	4416.61	4095.7	4280.94	3938.2
BIOCARTA_EFP_PATHWAY	4141.15	5290.41	5339.48	3971.27	4073.43	5525.34	5334.22	6017.84	4208.86	3701.48	2073.03	5143.59	3619.97	3086.73	2910.38
BIOCARTA_ALK_PATHWAY	4141.11	3901.56	3817.04	3294.24	3345.33	4107.81	3777.15	5294.6	5517.46	4174.41	4329.75	5180.49	4920.5	4382.09	3778.2
BIOCARTA_CLASSIC_PATHWAY	4105.76	2700.06	3836.97	4277.8	3312.53	3933.72	3261.88	8406.83	8505.4	3071.75	5045.58	5218.48	5026.46	5147.06	2257.68
BIOCARTA_CK1_PATHWAY	3250.61	3453.84	3492.28	3866.55	3225.79	3275.43	3167.55	2816.3	2732.63	4235.9	2516.07	2915.99	2420.67	4098.44	4809.02
BIOCARTA_RB_PATHWAY	2939.41	3060.39	2725.12	1993.67	2357.63	3349.38	3534.84	4168.44	2818.43	2209.13	3349.81	4897.91	4176.94	2335.03	334.11
BIOCARTA_ACTINY_PATHWAY	2708.81	2534.75	2556.21	2004.88	1176.66	2861.4	2471.48	2971.51	3927.22	3733.43	3992.37	1935.74	1956.48	3927.73	4728.52
BIOCARTA_PDZS_PATHWAY	2667.04	2334.25	2529.96	2651.84	2199.88	2738.54	2682.23	4670.25	3783.28	5841.49	4403.15	1958.08	2264.95	2320.3	4711.37
BIOCARTA_NUCLEARRS_PATHWAY	2041.33	1313.55	1760.38	1920.34	1932.24	2616.61	2868	3376.52	3289.57	2842.65	4107.22	1621.62	1671.92	2150.43	1873.94
BIOCARTA_SHH_PATHWAY	2020.6	1361.76	1869	1508.65	1209.57	2400.65	1967.57	2680.45	2293.4	1734.95	2073.63	1762.89	2109.46	3959.18	2962.68
BIOCARTA_ATRBRCA_PATHWAY	1459.61	1532.87	528.086	753.728	1386.35	347.893	180.287	3107.96	1873.32	916.679	2184.01	3366.11	2393.73	2669.64	82.4872
BIOCARTA_PTC1_PATHWAY	1198.75	926.432	131.789	716.704	2425.1	1534.71	637.937	2959.73	64.362	4276.75	2345.6	1782.78	1471.06	-400.784	-1997.22
BIOCARTA_MCM_PATHWAY	-98.7695	-165.59	-1009.42	-449.605	-986.47	508.363	-13.3555	2207.14	1299.75	-1847.21	-1163.28	1413.18	666.736	-31.9495	-792.706
BIOCARTA_INTRINSIC_PATHWAY	-1675.05	-968.201	-491.524	-1972.34	-1215.72	2019.27	1805.48	-1957.75	-2068.32	851.739	-1831.11	-1678.4	-2131.18	-1671.69	-2579.49

## Sheet: GO BP_IS_microarray
Name	Median score	S1594.00211_F1	S1594.00337_F1	S1594.00338_F1	S1594.00375_F1	S1594.00586_F1	S1594.00665_F1	S1594.00682_F1	S1594.00058_F1	S1594.00062_F2	S1594.00207_F1	S1594.00374_F2	S1594.00377_F1	S1594.00669_F1	S1594.00678_F1	S1594.01000_F1	S1594.00040_F1	S1594.00208_F1	S1594.00307_F1	S1594.00341_F1	S1594.00370_F1	S1594.00373_F1	S1594.00554_F1	S1594.00173_F1	S1594.00210_F1	S1594.00212_F1	S1594.00306_F1	S1594.00332_F1	S1594.00686_F1	S1594.00054_F1	S1594.00305_F1	S1594.00340_F1	S1594.00566_F1	S1594.01058_F1	S1594.00009_F1	S1594.00048_F1	S1594.00066_F1	S1594.00333_F1	S1594.00573_F1	S1594.00672_F1	S1594.00051_F1	S1594.00205_F1	S1594.00308_F1	S1594.00309_F1	S1594.00331_F1	S1594.00675_F1	S1594.01028_F1
GO_COTRANSLATIONAL_PROTEIN_TARGETING_TO_MEMBRANE	8833.96	8919.62	8891.5	8908.03	8850.7	8632.67	8723.62	8825.48	8802.87	8861.02	8720.35	8922.72	8792.67	8726.71	8826.95	8925.11	8829.83	8838.09	8896.29	8854.47	8923.91	8896.81	8960.59	8930.5	8689.16	8799.25	8762.48	8930.46	8885.6	8810.5	8776.72	8932.11	8914.05	8931.1	8646.61	8854.49	8940.17	8736.55	8787.7	8800.07	8892.5	8564.61	8773.33	8950.44	8746.8	8752.08	8629.92
GO_ESTABLISHMENT_OF_PROTEIN_LOCALIZATION_TO_ENDOPLASMIC_RETICULUM	8690.17	8773	8751.41	8764.7	8715.46	8505.03	8580.51	8683.14	8662.45	8708.4	8588.22	8785.44	8670.6	8586.1	8678.52	8784.85	8682.61	8703.89	8771.82	8702.34	8787.86	8744.91	8828.67	8777.45	8567.92	8660.36	8610.58	8792.97	8759.24	8661.72	8629.2	8778.5	8785.37	8785.35	8504.55	8697.2	8786.45	8622.69	8654.26	8659.79	8741.24	8467.81	8641.56	8802.68	8624.73	8609.25	8497.33
GO_POSITIVE_REGULATION_OF_INTERLEUKIN_6_BIOSYNTHETIC_PROCESS	8424.46	8289.27	8401.88	8499.78	8504.63	8354.56	8210.23	8227.29	8508.91	8302.96	8311.55	8429.83	8230.24	8466.22	8405.68	8341.18	8516.22	8465.9	8438.31	8294.56	8177.77	8497.73	8538.89	8421.8	8468.28	8378.58	8526.75	8417.26	8410.35	8517.72	8351.9	8450.63	8448.83	8427.12	8608.71	8407.58	8161.44	8545.67	8650.65	8215.56	8274.91	8529.12	8380.79	8474.38	8567.34	8236.01	8551.26
GO_NUCLEAR_TRANSCRIBED_MRNA_CATABOLIC_PROCESS_NONSENSE_MEDIATED_DECAY	8235.21	8281.82	8249.59	8301.66	8247.82	8044.26	8217.58	8158.84	8059.99	8217.51	8094.81	8325.95	8233.5	8140.12	8216.03	8302.44	8236.92	8258.42	8252.82	8248.62	8301.23	8271.78	8331.04	8329.01	8150.77	8110.7	8192.83	8319.12	8271.09	8249.05	8168.5	8309.53	8411.05	8349.13	8122.12	8226.4	8287.42	8192.38	8125.25	8199.19	8271.69	7890.1	8177.93	8352.01	8149.52	8120.67	7996.39
GO_PROTEIN_LOCALIZATION_TO_ENDOPLASMIC_RETICULUM	8200.92	8239.48	8302.12	8265.41	8258.61	8062.74	8041.75	8164.33	8136.31	8202.02	8096.76	8329.82	8159.87	8093.91	8152.02	8291.3	8211	8230.73	8301.59	8187.78	8356.75	8218.32	8353.23	8308.44	8055.62	8202.95	8138.72	8349.1	8266	8199.14	8113.93	8299.08	8294.71	8285.9	8008.06	8181.9	8275.86	8199.83	8157.18	8154.35	8278.07	8033.29	8182.01	8323.5	8145.13	8143.64	8037.54
GO_T_CELL_ACTIVATION_VIA_T_CELL_RECEPTOR_CONTACT_WITH_ANTIGEN_BOUND_TO_MHC_MOLECULE_ON_ANTIGEN_PRESENTING_CELL	8168.66	8146.88	8115.55	8121.79	8123.69	8223.96	8417.96	7757.9	8234.9	8143.95	7953.02	8074.51	7740.19	8262.1	8090.56	8075.36	8258.34	7877.88	8157.33	8199.36	8365.63	8421.1	8121.44	8217.78	8320.77	7934.6	8059.06	8109.96	8211.74	8248.93	8293.83	8115.25	8088.97	8023.21	8296.62	8198.04	8058.35	8322.15	8296.36	8037.58	8309.66	8192.85	8180	8278.19	8247.94	8121.7	8232.65
GO_REGULATION_OF_DENDRITIC_CELL_DIFFERENTIATION	8154.83	7886.81	8240.92	8135.99	7981.85	8321.91	8079.38	7639.8	8267.17	8223.83	7885.54	8168	8103.73	8502.5	7743.43	7992.59	8302.47	7941.56	8181.41	8099	7866.92	8215.87	8459.11	7847.99	8399.37	7814.21	7900.76	8302.27	8090.36	8193.6	8062.53	8033.52	8026.55	8322.56	8149.3	8160.35	7872.58	7936.21	8146.12	8197.18	8359.69	8269.88	8224.34	8365.11	8328.18	8178.5	8178.71
GO_NEGATIVE_REGULATION_OF_PHAGOCYTOSIS	8026.99	7985.96	7974.26	7817.39	7875.33	8471.31	8230.37	8007.53	7954.85	8101.44	8029.61	7752	7942.35	8067.46	8086.98	7940.86	8024.37	8138.95	8075.34	8087.5	7737	7898.37	8155.22	7875.87	8235.51	8068.05	8185.61	7666.9	7989.52	8138.71	7940.23	7998.05	8381.08	7938.57	8516.19	7916.8	7916.16	8210	8059.42	8082.36	8136.24	8103.62	7875.44	7915.96	7951.79	8052.57	8115.87
GO_TRANSLATIONAL_INITIATION	7943.48	8061.82	7856.73	8045.7	7927.28	7674.27	7892.79	7985.24	8001.9	7984.54	7770.86	8043.02	7932.69	7786.78	7910.87	8034.27	7980.54	7872.53	8021.03	7990.39	7968.26	7975	8064.25	8068.05	7721.94	7816	7791.06	8045.52	8057.61	7920.27	7807.93	8014.2	7969.28	8076.16	7812.87	7957.77	8055.18	7816.64	7734.61	7787.77	7954.26	7482.58	7818.16	8030.61	7805.56	7760.5	7681.43
GO_ESCRT_COMPLEX_DISASSEMBLY	7872.01	7761.56	7908.66	7816.7	7827.98	7837.52	7748.57	7971.71	7908.63	7839.18	7888.49	7945.74	8063.91	7933.75	7851.5	7794	7894.08	7902.86	7820.07	7832.31	7855.73	7707.65	7873.61	7820.08	7816.45	7954.85	7904.27	7667.2	7884.57	7955.52	7822.69	7870.41	7898.06	7909.71	7774.68	7876.4	7748.95	7816	7767.99	7963	7908.57	7982.24	7879.7	7810.66	7663.59	7896.88	7958.46
GO_ANTIGEN_PROCESSING_AND_PRESENTATION_OF_EXOGENOUS_PEPTIDE_ANTIGEN_VIA_MHC_CLASS_I	7817.48	7813.04	7728.58	7857.72	8067.14	7670.69	7855.78	7427.64	7959.35	7772.98	7795.91	7944.97	7491.95	7948.25	7872.94	7895.66	7783.62	7706.19	7806.7	7684.47	7996.84	7973.31	7813.66	8002.65	7774.06	7567.72	7802.12	7904.34	8170.14	7787.63	7799.62	7917.36	7877.42	7932.7	7536.04	7733.63	7898.46	7661.95	8051.42	7672.47	7955.42	7728	7807.29	7976.18	7821.29	7826.09	7866.51
GO_REGULATION_OF_FC_RECEPTOR_MEDIATED_STIMULATORY_SIGNALING_PATHWAY	7688.77	7781.41	7561.61	7209.92	6828.66	8128.03	8038.27	6919.95	7558.98	7689.16	7898.46	7685.48	7193.14	7715.6	7896.35	7769.93	7765.74	7846.49	7862.97	7458.39	6936.69	7193.6	7688.37	7733.54	8060.99	7875	7721.36	7182.4	7391.16	7801.74	7818.25	7596.25	7486.16	7624.44	7964.9	7554.36	7660.47	7771.96	6523.95	7656.29	7577.52	7889.38	7917.57	7372.35	7624.11	7757.97	8055.34
GO_NEGATIVE_REGULATION_OF_LEUKOCYTE_MEDIATED_CYTOTOXICITY	7688.47	7357.58	7707.73	7385.32	7569.11	7773.09	8509.44	7633.14	7409.7	7530.85	7752.99	7111.8	7745.78	8180.93	7889.98	7707.86	7850.96	7350.71	7695.27	7923.64	7297.16	8071.95	7661.83	7248.15	8269.85	8142.33	7306.94	7469.5	6985.54	8186.74	7606.63	7968.39	7318.1	8098.19	8224.05	7620.97	7132.93	7211.25	7391.17	7681.66	7660.46	8289.85	8081.51	7995.27	7596.49	7990.25	7719.18
GO_RESPONSE_TO_PEPTIDOGLYCAN	7683.83	7339.55	7977.38	7176.3	7262.73	7671.11	8000.46	7667.47	7662.58	7302	7772.39	7370.98	8399.32	7682.11	7576.7	7887.23	7901.07	8219.95	7892	8023.87	7238.43	8241.34	7965.53	7077.93	8091.47	8511.74	7483.81	7576.95	7939.51	7953.99	7658.06	7851.88	7685.55	7535.86	8254.09	7536.79	7092.28	7891.47	7833.31	7526.77	7598.82	8180.03	7575.73	7631.46	8232.77	7222.26	7945.52
GO_REGULATION_OF_UNSATURATED_FATTY_ACID_BIOSYNTHETIC_PROCESS	7589.33	7578.95	7501.84	7620.16	7476.67	7661.24	7385.47	7596.92	7785.9	7251.88	7348.11	7633.01	7581.73	7569.07	7637.27	7488.73	7668.9	7739.17	7775.7	7634.55	7373.2	7119.89	7853.95	7915.05	7969.06	8013.38	7326.67	7633.27	7719.85	8151	7494.3	7553.78	7640.26	7413.98	7560.81	7759.8	7118.26	8002.01	7556.48	7196.96	7539.01	7733.41	7500.02	7345.38	7758.74	7114.27	7934.59
GO_VIRAL_GENE_EXPRESSION	7549.48	7553.73	7554.16	7601.53	7560.29	7392.31	7440.45	7594.42	7455.35	7588.91	7445.18	7568.68	7472.16	7478.54	7512.88	7640.25	7554.49	7513.35	7631.66	7582.07	7685.82	7616.38	7610.66	7641.29	7456.45	7518.45	7492.66	7641.33	7521.83	7490.1	7442.63	7552.21	7618.89	7620.86	7260.32	7534.43	7572.68	7504.69	7455.96	7538.55	7648.51	7262.93	7546.76	7658.69	7568.22	7450.71	7336.74
GO_REGULATION_OF_NEUTROPHIL_ACTIVATION	7544.28	7607.38	7495.61	7180.02	7170.79	7993.79	7706.96	7493.98	7311.18	7708.59	7570.29	7314.32	7276.91	7408.75	7461.05	7203.02	7565.81	7435.43	7676.61	7651.51	7349.16	7512.14	7679.08	7421.48	7877.3	7628.64	7896.81	7441.7	7606.13	7522.75	7470.48	7248.01	7817.42	7612.39	7870.73	7414.74	7249.71	7640.01	6900.51	8064.9	7654.4	7698.17	7932.39	7762.81	7375.16	7758.49	7255.77
GO_ANTIGEN_PROCESSING_AND_PRESENTATION_OF_PEPTIDE_ANTIGEN_VIA_MHC_CLASS_I	7516.09	7518.29	7371.28	7660.42	7744.6	7210.29	7497	7078.31	7513.89	7396.97	7415.47	7617.97	7013.45	7631.6	7571.25	7554.63	7481.93	7325.11	7454.56	7339.78	7767.88	7645.7	7483.12	7688.83	7372.88	7250.82	7497.43	7599.21	7841.74	7462.91	7550.56	7683.32	7643.07	7551.72	7126.29	7447.64	7598.03	7385.22	7707.17	7390.52	7769.22	7448.4	7461.97	7620.2	7678.19	7527.3	7575.48
GO_REGULATION_OF_TRANSLATIONAL_INITIATION_IN_RESPONSE_TO_STRESS	7514.37	7394.34	7511.13	7449.72	7553.12	7620.08	7585.24	7820.01	7415.88	7298.08	7454.13	7709.1	8064.94	7491.97	7354.81	7475.6	7695.75	7701.65	7568.39	7612.45	7378.18	7570.84	7548.5	7459.66	7651.13	7923.77	7532.52	7596.24	7626.38	7653.6	7426.55	7499.3	7517.61	7425.81	7565.99	7484.4	7259.11	7577.53	7397.34	7373.01	7459.16	7503.05	7210.38	7272.96	7774.33	7246.02	7611.86
GO_COPII_COATED_VESICLE_CARGO_LOADING	7496.54	7317.27	7439.29	7599.27	7543.18	7453.68	7457.72	7506.19	7244.31	7499.12	7493.97	7535.59	7703.61	7470.04	7422.38	7569.94	7699.51	7616.44	7473.56	7556.1	7026.32	7349.1	7335.75	7354.48	7667.34	7831.33	7205.25	7625.47	7327.3	7513.63	7545.84	7339.33	7384.15	7547.15	7533.16	7547.24	7343.96	7134.98	6595.53	7415.04	7294.82	7620.98	7600.29	7426.9	7609.9	7502.29	7603.4
GO_CELLULAR_RESPONSE_TO_ARSENIC_CONTAINING_SUBSTANCE	7495.15	7345.68	7975.22	7350.83	7685.2	7833.77	7267.77	7649.85	7226.41	7355.94	7471.97	7881.16	7725.2	7268.23	7223.95	7186.27	7516.78	7776.31	7850.19	7609.59	7144.11	7408.87	7774.73	7044.06	7787.23	7700.32	8065.6	7766.7	7334.39	7473.51	7162.81	7609.06	8069.02	7637.4	7409.9	7374	7241.1	7676.87	6787.27	7349.04	6676.66	7730.64	8083.32	7390.23	7731.29	7030.16	7524.41
GO_MYD88_DEPENDENT_TOLL_LIKE_RECEPTOR_SIGNALING_PATHWAY	7462.89	7543.12	7306.34	7229.3	7067.61	7797.2	7655.29	7570.53	7326.73	7453.05	7481.54	7300.8	7470.29	7450.98	7606.31	7256.82	7746.05	7640.73	7492.63	7652.22	7133.01	7505.44	7450.85	7115	7860.71	7620.2	7508.11	7065.64	6942.37	7933.25	7441.16	7393.98	7690.29	7225.47	7954.04	7261.24	7410.95	7683.02	7176.04	7553.15	7459.45	8037.11	7458.7	7416.46	7422.76	7466.32	7832.47
GO_NUCLEAR_TRANSCRIBED_MRNA_CATABOLIC_PROCESS	7454.83	7494.66	7532.83	7465.05	7452.78	7432.86	7462.03	7449.31	7316.61	7479.06	7348.34	7557.78	7449.04	7386.12	7418.92	7485.58	7445.84	7456.88	7467.77	7435.14	7443.11	7480.34	7536.49	7552.27	7499.11	7364.19	7375.3	7550.73	7502.74	7511.15	7384.48	7501.29	7577.96	7536.59	7428.33	7481.77	7518.69	7409.13	7409.74	7438.72	7478.64	7248.59	7442.55	7532.02	7405.98	7349.23	7356.59
GO_REGULATION_OF_DEOXYRIBONUCLEASE_ACTIVITY	7439.46	7540.01	7668.34	7444.92	7440.17	7624.7	7134.96	7580.7	6752.6	7354.63	6440.83	7362.73	7090.56	7828.83	7462.52	7391.76	7528.93	7320.66	7557.31	7210.84	7383.6	7221.13	7780.96	7334.35	7599.8	7485.16	6842.48	7185.33	6817.19	7591.92	7635.93	7257.73	7036.48	7432.59	6831	7495	7579.49	7552.73	7461.88	7498.83	7420.78	7004.28	7784.02	7588.47	7625.83	7438.75	7355.63
GO_REGULATION_OF_INTEGRIN_MEDIATED_SIGNALING_PATHWAY	7427.55	6809.65	7479.29	7471.8	6790.15	7498.22	7016.51	7058.23	7739.32	7292.9	7414.84	7415.39	7582.57	7272.24	7489.87	7270.52	7495.93	7435.57	7449.31	7044.51	7456.39	7460.13	7593.95	7281.59	6668.61	7902.06	7064.79	7433.9	7718.42	7135.9	7645.96	7463.39	7512.16	7561.75	7446.98	7353.69	6816.44	6551.18	7450.66	7220.38	7399.26	7421.2	7856.06	7386.57	7334.57	7150.91	7761.97
GO_REGULATION_OF_TRANSLATION_IN_RESPONSE_TO_STRESS	7395.69	7256.01	7349.77	7312.18	7384.27	7487.72	7407.1	7657.96	7285.5	7202.71	7383.57	7553.53	7870.91	7347.08	7268.52	7371.44	7489.08	7555.68	7468.1	7498.13	7224.58	7434.65	7419.53	7334.11	7583.98	7772.58	7455.39	7446.48	7463.64	7486.72	7285.58	7409.26	7366.28	7292.82	7499.85	7363.89	7155.39	7550.04	7244.7	7314.51	7330.1	7483.16	7167.19	7172.7	7609.2	7227.95	7507.66
GO_FORMATION_OF_CYTOPLASMIC_TRANSLATION_INITIATION_COMPLEX	7375.31	7689.07	6920.86	7719.72	7695.51	6915.79	7219.12	7120.22	7456.15	7502.07	7390.51	7720.9	6738.17	7426.66	7260.55	7488.13	7394.72	7153.65	7495.86	7250.69	7539.79	7173.9	7550.84	7844.75	7003.14	6817.61	7186.13	7443.62	7489.19	7260.18	7373.13	7409.31	7199.89	7721.81	6959.26	7377.49	7883.85	6643.4	6877.68	7336.6	7268.23	6572.41	7513.24	7483.18	6858.07	7457.17	6829.83
GO_LATE_ENDOSOME_TO_VACUOLE_TRANSPORT	7339.51	7409.7	7128.47	7362.25	7359.31	7046.51	7270.82	7344.37	7603.64	7359.13	7595.56	7356.35	7053.2	7493.18	7385.94	7458.55	7394.31	7273.85	7314.85	7250.31	7551.09	7241.78	7231.99	7411.49	7204.5	7109.24	7515.34	7255.95	7682.27	7182.3	7294.11	7288.7	7342.33	7336.69	7100.78	7287.02	7427.14	7181.12	7768.64	7486.53	7496.97	7172.33	7318.27	7401.52	7103.46	7558.21	7230.58
GO_INTERLEUKIN_1_MEDIATED_SIGNALING_PATHWAY	7337.7	7347.29	7382.63	7186.81	7384.54	7075.7	7338.21	7092.05	7377.2	7323.81	7304.7	7553.88	7140.75	7336.59	7356.92	7481.88	7322.82	7476.51	7337.48	7406.27	7133.85	7424.74	7302.19	7304.51	7344.16	7360.44	7395.65	7335.87	7612.42	7394.02	7267.05	7295.67	7343.75	7438.49	7208.18	7295.67	7187.64	7274.3	7468.85	7162.34	7261.57	7266.83	7442.29	7376.29	7322.04	7337.92	7360.84
GO_CELLULAR_RESPONSE_TO_NITROGEN_STARVATION	7336.16	6984.19	7726.13	7174.78	7686.56	7989.89	6553.83	7101.14	7279.08	7212.59	7013.94	7648.88	7129.86	7395.12	7054.34	6914.91	7182.85	7569	7367.15	6898.33	7691.44	6706.86	7857.06	7450.18	7137.34	7674.6	7837.53	7452.43	7185.03	7509.43	7305.17	7605.5	7788.19	7420.63	7263.43	6827.84	6797.2	7807.91	7505.41	6837.1	6760.72	7646.41	7774.2	7395.19	7464.44	7007.83	7302.18
GO_REGULATION_OF_EXOSOMAL_SECRETION	7325.43	7297.41	7335.09	6788.26	6906.55	7494.58	7613.35	7211.6	6928.86	7225.45	6781.39	6872.41	7819.48	7540.9	7097.05	7398.93	7653.61	7661.61	7331.72	7638.42	7486.96	8106.77	6902.49	7196.35	7495.51	7371.17	6841.96	6801.05	7119.14	7625.19	7319.13	6532.24	6524.84	7290.22	7484.89	7831.69	6971.58	7477.9	7609.05	7551.73	7551.72	6608.65	6844.22	7187.16	7491.52	7196.28	7375.53
GO_ESTABLISHMENT_OF_PROTEIN_LOCALIZATION_TO_MITOCHONDRIAL_MEMBRANE	7305.36	7377.67	7303.77	7596.9	7722.55	7085.45	7248.49	7099.22	6861.69	7125.27	7160.52	7451.98	6902.94	7286.82	7212.37	7091.21	7278.5	7185.68	7321.86	7166.86	7852.47	7584.27	7325.23	7518.42	7249.81	6764.3	7515.1	7827.2	7557.4	7055.89	7344.79	7474.96	7456.5	7467.11	6769.37	6971.87	7523.45	7051.31	7604.84	7208.32	7518.08	7114.09	7306.96	7605.92	7353.36	7509.29	7022.59
GO_POSITIVE_REGULATION_OF_TELOMERASE_RNA_LOCALIZATION_TO_CAJAL_BODY	7261.72	7328.6	7331.44	7479.91	7620.59	7167.05	6762.93	6414.37	6648.79	7234.81	6907.22	7426.25	6402.98	7089.44	7141.42	7054.07	7208.4	7239.77	7352.17	7131.09	7698.46	7388.52	7627.97	7557.21	6943.79	6530.37	7299.29	7590.17	7334	7022.22	7304.22	7286.78	7393.92	7358.62	6701.47	6868.05	7418.06	6917.15	7478.74	7030.15	7296.08	6531.69	7323.26	7515.99	7273.96	7249.49	6766.69
GO_TOLL_LIKE_RECEPTOR_2_SIGNALING_PATHWAY	7261.69	7508.7	6864.37	6899.96	6512.41	7618.14	7598.25	7476.45	7189.03	7376.13	7353.07	6457.43	6965.24	7379.42	7456.24	7259.75	7587.57	7606.13	6987.76	7595.25	6762.45	7008.18	7054.56	6967.26	7928.46	7263.64	6976.7	6346.4	7055.84	7768.2	7435.68	7162.61	7303.68	6771.63	8090.84	7550.94	7001.18	7746.44	6602.96	7209.8	7580.55	7822.84	6932.96	7043.92	7134.59	7386.84	7711.56
GO_VESICLE_CARGO_LOADING	7251.8	7057.66	7202.56	7377.86	7282.82	7248.61	7142.54	7365.26	7142.6	7283.71	7263.97	7211.25	7515.58	7254.99	7148.3	7341.82	7372.04	7423.46	7172.28	7344.29	6775.27	7183.81	7159.8	7205.92	7452.81	7535.59	6973.22	7317.8	7210.24	7265.76	7318.21	7116.19	7080.99	7310.77	7366.05	7258.97	7079.88	6913.56	6460.03	7134.08	7015.16	7397.73	7327.48	7204.04	7350.55	7290.9	7211.9
GO_POSITIVE_REGULATION_OF_LEUKOCYTE_DEGRANULATION	7241.04	7323.11	7172.23	7060.83	6835.24	7647.95	7368.65	7186.41	6863.53	7411.3	7212.45	7003.39	6616.42	7306.72	7407.68	6916.65	7469.83	7347.41	7330.61	7391	6798.64	6966.89	7274.6	7172.95	7662.52	7225.19	7176.36	6876.36	6968.4	7416.39	7379.83	7233.84	7448.97	7141.31	7462.62	7349.77	7248.24	7111.86	6404.85	7353.56	7373.34	7655.8	7606.52	7154.25	6849.48	7586.06	7199.18
GO_MITOCHONDRIAL_ELECTRON_TRANSPORT_UBIQUINOL_TO_CYTOCHROME_C	7239.27	7243.59	7391.49	7531.69	7683.78	6990.89	6675.18	6758.4	6382.35	7074.79	6944.9	7518.41	6312.63	6851.76	7007.01	7330.08	7251.7	6901.73	7235.65	6938.24	7538.56	7242.88	7308.4	7441.69	6895.21	6469.65	7323.82	7579.09	7529.79	6922.07	7302.63	7575.77	7422.22	7461.8	6331.22	6896.54	7323.39	6849.15	7592.18	6736.72	7185.22	6492.64	7219.37	7402.11	7416.48	7404.79	6595.5
GO_MRNA_TRANSCRIPTION_BY_RNA_POLYMERASE_II	7220.26	6947	7690.76	6799.99	6806.37	7650.96	7245.03	7445.22	7419.35	7410.04	7047.97	7036.11	7756.52	7222.65	7060.96	6854.81	7318.8	7321.39	7274.48	7390.17	6856.22	7090.4	7479.27	7010.78	7973.88	7890.23	7269.52	6819.36	7139.54	7648.17	7127.26	7164.64	7461.74	7103.88	7718.39	7201.69	6924.13	7672.27	7121.16	7058.92	7217.88	8057.74	7405.04	7052.43	7157.6	7012.78	7793.33
GO_RIBOSOMAL_SMALL_SUBUNIT_ASSEMBLY	7202.6	6957.01	7049.64	7312.14	7535.12	6925.03	6858.73	6922.77	6942.2	7266.11	7113.61	7256.33	6892.08	7212.41	7055.82	7112.76	7127.26	7106.43	7303.45	7198.53	7668.63	7433.48	7600.2	7515.11	7038.27	7066.37	7167.39	7430.97	7389.3	7042.11	7206.67	7640.16	7629.43	7295.54	7035.26	7107.64	7361.18	6956.03	7526.63	7413.85	7276.32	7188.23	7400.99	7584.67	7269.34	7094.54	6826.96
GO_REGULATION_OF_CELLULAR_AMINO_ACID_METABOLIC_PROCESS	7180.61	7193.54	7128.96	7238.96	7562.51	6862.89	7104.42	6747.21	7149.93	7120.34	7012.81	7392.22	6541.88	7306.12	7170.64	7296.95	7190.58	7152.47	7098.35	7053.26	7416.59	7388	7258.44	7464.51	6926.12	6903.46	7167.82	7371.91	7657.93	7076.09	7096.31	7374.34	7313.21	7361.13	6801.69	6992.46	7404.64	6971.46	7537.89	7000.57	7442.58	6923.29	7206.55	7403.96	7214.63	7216.09	7060.38
GO_EXTRACELLULAR_VESICLE_BIOGENESIS	7179.92	7178.68	6970.31	6860.68	6892.54	7243.57	7471.55	6976.2	6840.33	7062.86	6849.99	6783.41	7560.57	7201.33	7102.88	7297.03	7458.76	7338.79	7272.87	7486.57	7451.71	7849.9	6714.34	7140.84	7326.41	7334.08	6866.07	6737.04	6785.21	7353.19	7217.7	6771.04	6542.26	7134.96	7337.89	7484.32	6864.16	7332.44	7311.25	7434.11	7393.44	6651.28	6716.23	7054.07	7181.16	7209.83	7144.31
GO_PROTEIN_LOCALIZATION_TO_EARLY_ENDOSOME	7155.25	7140.42	6952.48	7466.74	6789.89	6981.53	7757.78	7015.11	6626.66	7445.74	7651.58	7042.4	7060.56	7365.3	7451.09	7339.76	6994.9	7054.22	7139.8	6851.27	6400.64	7343.31	6824.73	7665.61	6566.56	7338.19	7064.9	6745.33	6883.62	7332.78	7390.03	7328.86	6987.67	7548.93	7240.84	7067.4	7269.5	7092.83	6566.44	7207.22	7198.4	7054.84	7170.07	7259.27	7182.02	7611.96	7313.58
GO_POSITIVE_REGULATION_OF_TYPE_2_IMMUNE_RESPONSE	7151.7	6901.49	7430.77	6612.05	6359.63	7126.3	7964.26	7117.03	6693.34	6682.44	7001.58	6855.91	7766.97	7412.75	6045.74	7337.25	7613.06	7687.57	7214.43	7754.25	6791.62	8191.37	7098.43	6393.87	7657.42	7967.85	6713.9	6905.93	6920.46	7317.66	7352.57	7324.32	6726.21	7098.62	7549.42	7177.1	6445.16	7496.48	7317.67	7100.55	7571.03	7039.41	6653.11	7262.5	7906.29	6803.7	7320.28
GO_RESPONSE_TO_INTERLEUKIN_12	7134.69	7115.1	7378.92	6572.66	6719.72	7329.53	6965.91	7030.57	7198.57	7174.85	6874.54	6868.4	7255.61	7232.57	6865.61	7213.46	7483.29	7344.11	7245.27	7261.37	6691.86	7028.25	7138.37	6815.64	7381.63	7431.86	6940.96	6742.13	7300.7	7494.64	7100.9	6734.01	6720.86	7125.17	7257.58	7415.41	6840.38	7267.03	7131.01	7028.64	7200.45	6884.94	7142.94	7031.8	7466.1	6811.74	7573.19
GO_CYTOPLASMIC_TRANSLATION	7122.83	7210.57	7074.45	7497.52	7246.57	6932.8	6956.72	7020.04	7124.75	7107.03	7223.93	7270.51	6899.97	7086.66	7056.13	7270.2	7155.89	7104.49	7199.34	7113.26	7292.27	7297.8	7194.72	7395.37	6941.59	6959.22	7040.57	7283.66	7153.43	7080.23	7232.72	7209.52	7035.68	7265.97	6870.75	7156.91	7371.36	6904.47	7123.27	7113.74	7071.29	6798.53	7122.4	7173.87	7050.99	7157	6909.08
GO_NUCLEOTIDE_EXCISION_REPAIR_DNA_DAMAGE_RECOGNITION	7116.26	7200.39	7110.35	7386.1	7479.7	6822.93	6961.25	7002.39	6962.48	7107.72	7203.79	7366.98	6857.91	7156.15	7097.81	7247.32	6994.25	7077.56	7122.18	6950.21	7592.95	7313.37	7171.54	7361.7	6864.79	6823.61	7039.51	7422.18	7176.43	6908.65	7082.81	7235.21	7143.58	7165.03	6637.14	6911.77	7243.81	6831.58	7329.73	7088.88	7134.88	6750.36	6965.87	7309.6	7177.37	7222.58	6813.18
GO_VIRION_ASSEMBLY	7108.18	7127.63	7005.89	7074.59	7304.47	6883.94	6899.14	6844.69	6533.87	7144.63	6744.95	7201.71	6655.05	7119.8	7173.28	7170.3	7322.64	7092.43	7083.08	6964.57	7321.92	7234.57	7020.57	7206.77	6899.59	6963.96	7130.15	7163.44	6899.48	7126.86	7096.57	7238.84	7280.89	7121.63	6646.35	7012.1	7305.27	6978.03	7238.26	7009.3	7402.86	6891.39	7161.14	7278.26	6983.65	7259.86	6764.05
GO_PROTEIN_TARGETING_TO_MEMBRANE	7101.09	7155.69	7202.51	7187.46	7070.49	6955.41	6937.63	7107.04	7059.07	7155.9	6972.43	7180.44	7167.35	7079.17	7105.06	7190.44	7103.59	7197.69	7097.56	7073.18	7098.63	7198.25	7181.13	7160.77	7030.51	7140.82	6969.3	7173.89	7103.54	7110.35	7065.43	7204.56	7129.75	7190.26	6949.04	7057.48	7106.57	6922.38	7076.07	7096.47	7114.72	6946.22	7041.78	7097.43	7033.21	6991.04	6957.62
GO_TELOMERASE_RNA_LOCALIZATION	7093.97	7153.17	7124.73	7290.81	7433.75	7027.17	6704.95	6408.24	6634.67	7042.52	6842.12	7281.45	6351.81	6914.5	7003.84	6968.93	7022.92	7039.5	7207.65	6967.88	7450.03	7231.23	7419.91	7331.18	6804.98	6490.53	7102.9	7487.13	7143.22	6888.09	7176.98	7120.91	7167.14	7240.31	6664.44	6751.96	7264.01	6792.01	7261.67	6905.63	7103.92	6481.6	7154.53	7293.04	7165.19	7085.04	6658.69
GO_POSITIVE_REGULATION_OF_ESTABLISHMENT_OF_PROTEIN_LOCALIZATION_TO_TELOMERE	7089.66	7074.26	7157.26	7362.05	7554.22	6945.92	6663.65	6499.74	6767.12	6952.49	6790.83	7330.04	6423.41	6815.05	6901.09	6820.41	7112.35	7124.57	7187.19	6929.52	7501.52	7233.01	7487.65	7469.95	6797.79	6547.06	7032.53	7512.31	7116.05	7005.13	7252.8	7105.06	7176.8	7347.83	6623.52	6812.07	7290.81	6756.99	7181.35	6600.44	7156.74	6501.43	7063.15	7378.64	7176.07	7110.57	6725.57
GO_REGULATION_OF_NUCLEAR_TRANSCRIBED_MRNA_POLY_A_TAIL_SHORTENING	7087.85	7127.18	7179	6994.97	6907.39	7537.97	7085.09	7224.21	7387.29	7043.32	7495.96	7138.78	7580.22	7250.39	7090.61	7007.21	7060.91	7114.12	7164.12	6999.37	6397.36	6705.57	6898.09	6944.59	7715.48	7487.84	7130.16	6635.72	7195.21	7306.11	6971.9	6912.86	6955.4	6774.62	7633.75	7349.04	6818.41	7570.68	6965.29	7138.92	6769.12	7542.02	7060.67	6880.74	6986.09	6805.51	7409.96
GO_PROTEASOMAL_UBIQUITIN_INDEPENDENT_PROTEIN_CATABOLIC_PROCESS	7081.83	7322.62	6672.14	7073.58	7694.66	6767.02	7518.97	6693.85	7500.48	7082.08	7102.11	7509.45	6483.47	7456.01	7320.92	7402.46	7019.48	7239.12	6997.9	6949.95	7406.3	7276.42	6811.77	7518.12	7042.23	6491.88	7209.42	7081.57	8029.14	6846.23	7083.03	7061.55	7076.74	7603.83	6543.33	6925.42	7424.22	6951.46	7764.29	6977.25	7695.46	6875.72	6982.07	7461.97	6982.62	7336.49	6996.41
GO_POSITIVE_REGULATION_OF_T_CELL_CYTOKINE_PRODUCTION	7081.73	7079.45	7408.94	6563.36	6574.12	6960.14	7681.98	7651.96	6877.47	6653.12	7160.1	6744.75	7780.07	7195.72	6149.06	7248.65	7320.66	7557.54	6969.77	7660.74	6611.11	7756.62	7012.18	6498.21	7412.5	7978.23	6910.64	6832.58	6835.64	7084	7122.02	7216.46	6581.97	7040.92	7416.96	6875.03	6316.48	7327.29	7103.71	7136.34	7212.95	6934.71	6619.06	6742.27	7644.75	7036.27	7206.12
GO_REGULATION_OF_PROTEIN_FOLDING	7077.15	7173.54	7186.52	7381.5	7361.9	6946.18	6849.31	6872.99	6825.96	6906.24	7185.44	7462.75	6823.67	7052.12	7104.81	7299.47	6861.26	6938.33	7208.54	6862.55	7467.86	6980.94	7049.19	7287.79	6766.05	6684.59	6981.46	7594.94	7475.76	6866.87	7022.19	7169.2	7095.47	7279.51	6243.56	6818.24	7299.46	7100.88	7075.54	6931.03	7105.5	6738.15	7078.75	7093.08	7235.78	7096.33	6606.39
GO_MRNA_TRANSCRIPTION	7043.29	6824.01	7441.88	6627.28	6694.85	7367.15	6938.87	7157.32	7252.01	7110.44	6928.4	6970.5	7583.75	6978.21	6826.01	6803.34	7164.5	7190.07	7178.83	7216.53	6476.91	6964.19	7338.08	6952.52	7752.49	7770.55	7145.57	6845.48	6903.46	7311.13	6944.98	7050.43	7263.24	6949.38	7375.12	7036.15	6668.26	7359.78	6924.5	6894.9	6943.97	7760.14	7303.83	7004.09	7083.68	6770.05	7457.72
GO_NEGATIVE_REGULATION_OF_NATURAL_KILLER_CELL_MEDIATED_IMMUNITY	7026.08	6677.55	7025.81	6331.29	6243.02	7157.08	8145.91	7026.37	6289.92	6960.44	6784.33	6001.58	7323.22	8038.55	7005.37	7240.71	7241.38	6424.26	7036.38	7352.56	6628.9	7567.74	6717.6	6141.12	7713.32	7673.65	6342.65	6429.16	5670.14	7813.23	6838.43	6982.08	6112.33	7700	7835.7	7033.63	6087.38	6451.96	6873.93	7014.34	7041.01	7529.05	7711.7	7153.95	7026.34	7259.5	7320.93
GO_POSITIVE_REGULATION_OF_LEUKOCYTE_ADHESION_TO_VASCULAR_ENDOTHELIAL_CELL	7013.39	6971.63	7071.34	6567.18	6507.71	7382.01	7487.89	6877.05	6833.08	7183.82	6795.36	6313.62	6876.04	7314.78	6955.34	6486.35	7170.46	7094.32	7111.42	7227.14	6308	7132.26	7237.89	6322.46	7812.37	7315.74	7202.77	6536.73	6601.41	7356.02	7140.2	6491.94	7240.91	7028.7	7565.38	6839.31	6072.98	6998.09	6734.58	6843.98	6838.39	7340.98	7097.41	7104.67	6846.05	6599.66	7448.57
GO_VIRAL_LATENCY	6977.81	7017.65	6997.28	6930.76	6904.48	7050.64	7307.3	6859.39	6927.6	7248.15	6873.88	7121.98	6899.94	7011.28	7023	7037.17	6855.91	6696.55	6865.93	6777.19	6931.76	7211.87	7289.02	7067.62	7021.56	6649.23	6818.75	7002.41	6855.37	6951.96	6881.39	6814.76	7017.02	7004.91	7057.05	6971.84	7221.49	6993.03	6979.25	6886.73	6971.94	6783.13	7074.8	7169.08	6825.09	7059.97	6976.38
GO_CHAPERONE_COFACTOR_DEPENDENT_PROTEIN_REFOLDING	6969.46	6847.1	7377.37	7405.77	7001.21	7373.91	7151.7	7143.76	6896.18	7030.96	6761.16	7084.32	7122.04	6962.48	6756.9	7032.87	7041.94	7005.06	6953.17	7067.19	6802.73	7095.36	6672.83	6905.85	6958.01	6824.37	7252.6	6905.21	6947.18	7165.15	7049.59	7059.1	6976.44	7038.98	6855.09	6856.16	7019.71	6799.17	6528.07	6726.65	6813.89	6921.81	7074.71	6889.89	7027.15	6780.3	6444.03
GO_ENDOSOME_TRANSPORT_VIA_MULTIVESICULAR_BODY_SORTING_PATHWAY	6968.16	7002.15	6849.39	6860.23	7120.99	6359.6	6840.4	7048.56	6465.1	6747.03	6885.1	7209.1	6665.37	7066.46	6871.72	7085.47	6989.62	7039.91	7149.66	6899.67	7174.83	6808.39	7100.62	7106.51	6851.64	6961.63	7260.05	6974.7	6920.43	6787.99	6898.66	7115.23	7083.67	7069.14	6883.16	6939.39	6916.92	6643.64	7128.73	7183.74	7095.19	6766.57	7127.18	7157.9	6588.93	7026.09	6696.07
GO_VIRAL_BUDDING_VIA_HOST_ESCRT_COMPLEX	6963.01	6925	6948.33	6922.19	7247.62	6547.75	6480.84	6492.73	6211.78	6908.9	6265.37	7182.86	6346.05	7085.79	7080.77	6921.81	7283.65	7127.55	6977.68	6761.77	7218.03	7139.46	6820.21	7039.97	6680.15	6841.24	7150.27	7082.95	6752.84	7000.62	6999.27	7108.46	7189.86	7120.5	6284.76	6881.1	7278.51	6856.19	7065.66	6637.88	7419.44	6775.17	7053.63	7321.79	6844.57	7133.07	6604.5
GO_CYTOPLASMIC_TRANSLATIONAL_INITIATION	6954.8	7212.95	6692.95	7265.48	7209.57	6682.89	6845.49	6832.77	7022.56	7044.04	7044.81	7155.68	6598.88	6970.25	6887.03	7068.56	6974.02	6831.43	7091.35	6955.16	7066.06	6945.83	7160.24	7368.24	6777.2	6731.8	6948.36	7155.58	6949.51	6926.15	7015.34	7042.71	6939.42	7274.01	6690.87	6954.45	7374.43	6592.93	6791.26	6895.42	6840.05	6511.37	7119.47	7119.74	6754.96	7000.63	6663.03
GO_POSITIVE_REGULATION_OF_MONOCYTE_DIFFERENTIATION	6947.86	6912.27	7081.23	7075.17	7137.42	6959.33	6187.01	7048.06	6623.02	6981.67	6645.06	7047.61	6832.77	6388.39	6670.33	6491.15	7008.45	6508.7	6940.11	6955.61	7016.15	6846.5	7156.99	7253.56	7366	6645.11	6883.55	7347.25	7313.91	6858.68	6925.42	6922.87	7237.99	6979.43	6773.17	6782.16	7036.39	7293.86	6804.75	6646.11	7295.13	6799.9	6796.88	7065.05	7241.15	7054.08	6657.74
GO_MITOCHONDRIAL_ELECTRON_TRANSPORT_NADH_TO_UBIQUINONE	6940.11	7111.43	6794.08	7294.24	7449.06	6473.6	6542.35	6587.56	6675.67	6875.26	6810.32	7120.56	6209	6828.13	6860.5	6933.22	6933.22	6875.45	6966.46	6859.8	7630.9	7160.29	7138.84	7341.69	6381.72	6363.31	6889	7335.86	7137.01	6553.05	7109.16	7166.45	7137.68	7128.94	6384.34	6667.99	7237.45	6824.28	7480.12	6954.3	7167.64	6293.35	6946.99	7378.85	7046.12	7165.97	6481.88
GO_REGULATION_OF_PROTEIN_DEUBIQUITINATION	6939.46	6692.94	7295.31	6526.63	6674.39	7103.02	6890.48	6736.84	6920.8	6952.11	6640.55	6945.15	7234.94	6821.35	6457.23	6738.77	7220.18	7381.59	7231.97	7127.54	6794.84	7025.17	7105.47	6417.85	7462.04	7441.75	6973.18	6689.36	6919.49	7428.45	7211.68	6746.2	6987.17	6930.35	7360.38	6907.58	6611.76	7482.75	6678.75	6748.64	6933.76	7514.23	7266.28	6727.3	7214.42	6627	7494.88
GO_RIBOSOME_ASSEMBLY	6929.36	7019.17	6904.31	7224.88	7343.97	6826.9	6601.54	6567.86	6652.04	6879.96	6875.67	7032.23	6454.7	6918.21	6909.82	6883.48	6910.45	6821.71	7101.62	6852.42	7375.07	7165.99	7266.55	7340.75	6677.33	6565.95	6902.11	7317.44	7097.01	6940.51	7063.92	7227.81	7226.1	7030.24	6437.11	6884.67	7123.31	6731.53	7176.36	6915.49	7061.61	6613.49	7033.05	7214.38	7169.27	6977.82	6667.24
GO_PROTEIN_LOCALIZATION_TO_NUCLEOPLASM	6925.31	6891.89	7066.62	7186.54	7405.24	6810.13	6496.35	6375.78	6613.47	6779.1	6626.54	7159.74	6276.91	6665.1	6725.6	6653.7	6967.04	6979.37	7023.69	6775.29	7378.88	7100.05	7393.67	7291.49	6663.32	6436.72	6885.68	7348.4	6986.65	6910.31	7087.09	6936.31	7144.79	7164.41	6602.85	6641.87	7109.66	6713.96	7091.37	6440.83	7071.33	6412.5	6919.25	7214.26	7136.91	6931.37	6585.69
GO_RNA_DECAPPING	6916.28	6809.61	7085.83	6750.43	6676.18	7071.03	7272.25	6997.47	6674.83	6986.88	7269.84	6884.13	6878.61	6930.31	6948.91	6947.42	6695.56	7066.74	6924.74	6948.03	6621.91	6736.1	6907.83	6873.62	7107.68	7105.44	6848.69	6797.92	6979.79	7216.47	6836.21	6711.09	6785.55	6674.52	7112.85	7099.59	6618.54	6926.62	6793.55	6924.76	6664.96	7199.73	6852.53	6404.82	7138.13	6651.12	7232.21
GO_RIBOSOMAL_LARGE_SUBUNIT_ASSEMBLY	6913.59	7159.02	6927.14	7259.11	7448.44	6905.98	6476.84	6568.17	6653.44	6739.51	6788.78	7036.92	6422.45	6792.02	6835.59	6826.52	6871.36	6660.57	7128.94	6780.94	7351.96	7136.96	7273.32	7360.72	6579.02	6492.81	6824.95	7395.94	6995.77	6921.2	7013.27	7065.94	7297.92	6900.17	6309.53	6827.67	7116.94	6885.87	7155.39	6808.2	7054.48	6606.11	7001.98	7101.89	7180.08	7011.93	6742.29
GO_VIRAL_TRANSLATION	6909.62	7071.55	6705.13	7074.01	7129.12	6713.79	6946.11	6794.09	6671.98	6827.37	6899.31	7014.08	6439.35	6912.97	6835.12	6925.03	7105.37	6730.2	6890.8	6973.68	7070.61	7060.98	7026.23	7071.57	6495.29	6720.23	6923.2	7214.49	7075.84	6666.64	6738.7	6962.21	6887.01	7032.54	6134.48	6746.14	7122.56	6266.75	7092.98	6815.84	6983.56	6220.69	6702.37	7016.75	6906.26	6973.3	6345.22
GO_MYD88_INDEPENDENT_TOLL_LIKE_RECEPTOR_SIGNALING_PATHWAY	6900.49	6734.94	6798.92	6668.52	6721.35	7205.56	7720.08	6815.32	6737.84	7090.6	6586.72	6582.78	7032.45	6993.29	6627.52	7042.89	7248	7146.6	6958.72	7123.9	6750.03	7386.23	6620.91	6776.48	7131.3	7225.93	6733.24	6876.13	6869.05	7000.48	7036.62	6819.41	6675.29	6603.79	7255.37	7086.48	6856.15	7183.27	7046.81	6482.94	6919.42	7356.88	6813.13	6881.56	6969.07	6782.64	7214.86
GO_T_CELL_EXTRAVASATION	6875	7264.87	6651.73	6679.92	6369.71	7003.41	7234.12	7049.74	6646.72	6929.69	6959.16	6363.56	6336.2	7055.52	7105.66	6664.73	7061.51	6749.31	6976.35	7028.9	6566.02	6888.31	6747.9	6485.07	7491.26	6790.35	7115.39	6671.28	6472.16	7089.9	6891.34	6619.48	6858.35	7007.57	7195.39	6823.98	6677.23	6720.43	6723.46	6887.8	6929.72	6596.36	6900.12	7084.44	6459.68	6862.19	6940.47
GO_POSTTRANSLATIONAL_PROTEIN_TARGETING_TO_ENDOPLASMIC_RETICULUM_MEMBRANE	6874.13	7043.55	7342.11	7052.45	7182.22	6871.14	6858.34	6877.12	6576.55	6807.85	7116.66	7381.61	7150	6869.04	6732.17	7232.79	6812.36	7172	7177.52	6734.83	6662.88	6928.89	7369.41	6819.3	6970.62	6827.89	6850.64	7185.54	6850.76	6815.43	6834.95	6818.01	7190.42	7180.48	6328.02	6722.24	7042.58	6932.39	6780.12	6894.18	6827.28	6821.06	7100.18	7103.83	7179.86	6799.56	6667.45
GO_GAMMA_DELTA_T_CELL_ACTIVATION	6867.87	6890.59	6026.41	6636.45	6204.12	7407.41	6867.34	6749.45	7236.14	6655.01	6818.75	6385.66	7112.99	6927.79	7370.57	6940.59	7033.63	6748.7	7262.25	7073.4	6402.99	6952.88	5523.03	6818.28	6890.93	6655.34	6809.49	6225.12	6868.4	7107.56	6678.67	6809.89	6243.57	6284.87	6882.17	6911.86	6608.18	7360.55	6938.92	6903.3	7155.81	7132.13	6637.15	6358.14	6957.44	6407.9	7050.23
GO_MATURATION_OF_LSU_RRNA	6858.77	7158.33	6804.07	7017.61	7244.19	6303.63	6034.25	5633.5	5836.95	6780.77	6587.58	7000.38	5559.04	6951.13	6557.34	6761.97	6863.13	6544.79	6846.17	6560.47	7366.64	7027.34	6928.52	7254.67	6410.88	5622.41	6857.07	7319.08	6860.47	6133.23	6961.55	6944.82	6801.89	6984.68	5559.08	6447.95	7171.62	6121.37	7367.33	6929.76	6877.97	5207.75	6900.33	7431.84	6924.18	7182.91	6180.63
GO_RIBOSOMAL_LARGE_SUBUNIT_BIOGENESIS	6858.64	7076.89	6874.54	7131.81	7282.6	6587.19	6301.78	6241.26	6360.98	6750.92	6727.24	7021.79	6057.59	6842.73	6739.24	6759.17	6834.84	6649.48	6974.87	6660.16	7337.14	7042.24	7098.85	7260.51	6421.17	6191.09	6841.13	7311.59	6960.41	6538.83	6946.24	6987.29	7048.73	6967.79	5995.02	6656.15	7116.26	6566.07	7269.23	6812.43	6924.89	6040.19	6906.16	7175.43	7039.16	7025.42	6424.24
GO_POSITIVE_REGULATION_OF_MAST_CELL_ACTIVATION_INVOLVED_IN_IMMUNE_RESPONSE	6855.32	6751.02	7234.44	6771.95	6851.84	7124.3	6789.39	6475.12	6166.87	6965.06	6782.29	7259.09	6186.31	6858.81	6941.68	6455.65	7071.46	6737.86	7137.99	6950.83	6572.06	6794.87	7301.31	6918.69	6931.93	6800.41	6813.01	7009.93	6510.09	6871.27	7037.88	6963.42	7088.96	6988.67	6358.37	6794.92	7064.36	6082.08	6271.39	6884.66	6730.4	7000.09	7485.51	6700.88	6723.37	7014.05	6495.57
GO_RESPONSE_TO_MANGANESE_ION	6855.18	7359.38	6839.51	6735.39	6487.79	7748.68	6522.19	6665	6249.49	6629.77	7536.23	6903.09	7025.71	6694.08	7458.24	6962	6870.84	6910.12	7173.43	7320.34	6423.36	6506.48	6799.26	6740.8	7460.41	7236.19	7278.39	6728.95	6953.19	6831.54	6614.86	7110.9	7019.53	6605.23	7484.47	6930.87	6558.54	7375.84	6743.4	7448.15	6665.36	6617.28	6463.34	6653.76	7094.78	7031.36	6646.6
GO_ATP_SYNTHESIS_COUPLED_ELECTRON_TRANSPORT	6854.38	7007.22	6787.76	7242.15	7459.3	6482.53	6326.93	6294.42	6606.41	6742.75	6662.93	7182.6	5928.4	6744.96	6680.71	6933.05	6854.38	6728.91	6863.99	6693.69	7520.14	7048.41	7128.95	7315.16	6201.41	6271.46	6854.37	7351.64	7133.78	6560.55	7036.7	7151.89	7121.77	7135.41	6157.46	6465.11	7211.41	6574.57	7383.39	6617.81	7142.7	6171.43	6812.62	7272.78	7054.62	7028.46	6402.81
GO_ANAPHASE_PROMOTING_COMPLEX_DEPENDENT_CATABOLIC_PROCESS	6848.3	7001.84	6688.07	7074.68	7471.66	6639.39	6708.21	6231.94	6837.7	6664.19	6708.25	7280.04	6023.1	6940.52	6850.5	7214.6	6864.44	6780.13	6733.13	6745.45	7160.39	6996.3	6899.51	7367.34	6384.82	6353.11	6820.87	7239.66	7311.3	6704.69	6846.1	7087	7011.56	7115.74	6293.91	6512.46	7291.77	6573.86	7205.67	6495.47	7294.81	6369.02	6810.04	7101.74	7001.69	6997.42	6594.23
GO_REGULATION_OF_RNA_POLYMERASE_II_REGULATORY_REGION_SEQUENCE_SPECIFIC_DNA_BINDING	6844.18	6582.25	7211.26	6721.66	6585.64	7116.91	5852.45	6235.3	6420.58	7236.39	6835.17	6835.99	6891.92	6789.13	6835.48	6506.54	6768.58	6583.46	7032.15	7029.59	6744.2	6550.14	7047.82	6822.02	7409.41	7210.14	6870.09	6863.49	6471.55	7193.44	6860.36	6852.36	7045.63	6863.83	7000.42	7010.7	6152.73	7539.97	6743.48	6864.77	6713.69	7215.56	7080.43	6582.38	6805.31	6213.94	7299.47
GO_RRNA_CONTAINING_RIBONUCLEOPROTEIN_COMPLEX_EXPORT_FROM_NUCLEUS	6838.79	7000.37	6640.92	7181.4	7265.12	6743.92	6357.6	6208.16	6940.68	6790	6893.18	7056.61	6302.36	6785.51	6856.89	6826.49	6603.62	6669.62	6851.09	6539.16	7146.04	6888.9	7016.13	7253.55	6062.7	5536.44	6594.03	7313.93	6995.04	6634.48	6901.44	6959.3	6808.11	7091.53	5923.71	6622.55	7176.45	6145.26	7069.32	6571.25	6860.46	5704.09	6809.91	7201.27	6934.28	6862.3	6498.69
[truncated: 5,039 more rows]

## Sheet: HALLMARK_IS_microarray
Name	Median score	S1594.00211_F1	S1594.00337_F1	S1594.00338_F1	S1594.00375_F1	S1594.00586_F1	S1594.00665_F1	S1594.00682_F1	S1594.00058_F1	S1594.00062_F2	S1594.00207_F1	S1594.00374_F2	S1594.00377_F1	S1594.00669_F1	S1594.00678_F1	S1594.01000_F1	S1594.00040_F1	S1594.00208_F1	S1594.00307_F1	S1594.00341_F1	S1594.00370_F1	S1594.00373_F1	S1594.00554_F1	S1594.00173_F1	S1594.00210_F1	S1594.00212_F1	S1594.00306_F1	S1594.00332_F1	S1594.00686_F1	S1594.00054_F1	S1594.00305_F1	S1594.00340_F1	S1594.00566_F1	S1594.01058_F1	S1594.00009_F1	S1594.00048_F1	S1594.00066_F1	S1594.00333_F1	S1594.00573_F1	S1594.00672_F1	S1594.00051_F1	S1594.00205_F1	S1594.00308_F1	S1594.00309_F1	S1594.00331_F1	S1594.00675_F1	S1594.01028_F1
[truncated: 52 more rows]

[truncated: 1 more sheets: BIOCARTA_IS_microarray]
