# Supplementary material for: A Novel Processing-Free Method for RNAseq Analysis of Spontaneous Sputum in Chronic Obstructive Pulmonary Disease
Source: Front Pharmacol. 2021 Aug 19;12:704969. doi: 10.3389/fphar.2021.704969 (PMC8417251; doi:10.3389/fphar.2021.704969)
Supplement: Supplementary file 4 [file Table1.XLSX]

## Sheet: S1
Request ID	Sample Type	RNA Integrity	DV200 (%)	Approximate Yield Nanodrop (ng)	RNASeq.
S1842-00067	SS_whole	2.3	66	16.35	Exclude
S1842-00068	SS_whole	1.8	22	71.19	Exclude
S1842-00072	SS_whole	2.5	21	31.93	Exclude
S1842-00074	SS_whole	2.3	64	52.8	Exclude
S1842-00075	SS_whole	2.4	19	15.9	Exclude
S1842-00076	SS_whole	n/a	14	29.51	Exclude
S1842-00077	SS_whole	2.4	14	14.51	Exclude
S1842-00079	SS_whole	2.6	8	51.24	Exclude
S1842-00080	SS_whole	1.5	17	20.24	Exclude
S1842-00081	SS_whole	2.5	34	34.68	Exclude
S1842-00116	SS_MTM_whole	1.7	70	16.57	Exclude
S1842-00116	SS_MTM_plugs	2.5	19	22.12	Exclude
S1842-00112	SS_MTM_whole	2.1	49	62.94	Exclude
S1842-00112	SS_MTM_plugs	2.3	46	46.41	Exclude
S1842-00119	SS_MTM_whole	2.4	22	54.967	Exclude
S1842-00119	SS_MTM_plugs	2.5	22	10.5721	Exclude
S1842-00110	SS_MTM_whole	2.2	44	483.03	Process
S1842-00110	SS_MTM_plugs	2.3	29	135	Process
S1842-00106	SS_MTM_whole	2.2	56	481.3	Process
S1842-00106	SS_MTM_plugs	2.1	70	336.49	Process
S1842-00111	SS_MTM_whole	2.3	40	215.52	Process
S1842-00111	SS_MTM_plugs	2.4	29	55.13	Process
S1842-00115	SS_MTM_whole	2.1	46	341.88	Process
S1842-00115	SS_MTM_plugs	2.1	36	862.4	Process
S1842-00118	SS_MTM_whole	2.4	19	71.874	Process
S1842-00118	SS_MTM_plugs	2.5	5	109.527	Process
S1842-00108	SS_MTM_whole	2.3	36	1755.82	Process
S1842-00108	SS_MTM_plugs	2.2	46	5727.6	Process
S1842-00107	SS_MTM_whole	2.3	38	752.06	Process
S1842-00107	SS_MTM_plugs	2.3	62	2165.45	Process
